# Supplementary material for: Canine real-time detection of SARS-CoV-2 infections in the context of a mass screening event
Source: PubMed Central journal article supplement — BMJ Glob Health. 2022 Nov 10;7(11):e010276. doi: 10.1136/bmjgh-2022-010276 (PMC9659709; doi:10.1136/bmjgh-2022-010276), 2022-11-10
Supplement: bmjgh-2022-010276supp001.pdf [file bmjgh-2022-010276supp001.pdf]

Supplemental table 1. Characteristics of the participants

| Sample ID | Concert | Age | Sex    | SARS-CoV-2 RT-qPCR | PoC-antigen test | Dog decision | Previous SARS-CoV-2 infection | Diagnosis of Long COVID | Vaccination status | Vaccine              |                       | Date last vaccination | Time period last vaccination until concert [days] | Chronic diseases | Medication   |
|-----------|---------|-----|--------|--------------------|------------------|--------------|-------------------------------|-------------------------|--------------------|----------------------|-----------------------|-----------------------|---------------------------------------------------|------------------|--------------|
|           |         |     |        |                    |                  |              |                               |                         |                    | first                | second                |                       |                                                   |                  |              |
| C1.1      | 1       | 51  | Female | Negative           | Negative         | No           | No                            | No                      | 2nd dose           |                      | Covid-19 (Moderna)    | 20/6/2021             | 91                                                | None             | None         |
| C1.2      | 1       | 53  | Male   | Negative           | Negative         | No           | No                            | No                      | 2nd dose           |                      | Comirnaty (Biontech)  | 27/7/2021             | 54                                                | None             | None         |
| C1.3      | 1       | 53  | Male   | Negative           | Negative         | No           | No                            | No                      | 2nd dose           |                      | Comirnaty (Biontech)  | 18/6/2021             | 93                                                | Hypertension     | Ramipril     |
| C1.4      | 1       | 33  | Male   | Negative           | Negative         | No           | No                            | No                      | 2nd dose           |                      | Comirnaty (Biontech)  | 30/7/2021             | 51                                                | None             | None         |
| C1.5      | 1       | 41  | Female | Negative           | Negative         | No           | No                            | No                      | Unvaccinated       |                      |                       |                       |                                                   | None             | None         |
| C1.6      | 1       | 40  | Male   | Negative           | Negative         | No           | No                            | No                      | Unvaccinated       |                      |                       |                       |                                                   | None             | None         |
| C1.7      | 1       | 51  | Female | Negative           | Negative         | No           | Yes                           | No                      | 1st dose           | Comirnaty (Biontech) |                       | 7/7/2021              | 74                                                | None             | None         |
| C1.8      | 1       | 42  | Female | Negative           | Negative         | No           | No                            | No                      | 2nd dose           |                      | Comirnaty (Biontech)  | 6/7/2021              | 75                                                | None             | None         |
| C1.9      | 1       | 49  | Female | Negative           | Negative         | No           | No                            | No                      | 2nd dose           |                      | Comirnaty (Biontech)  | 8/7/2021              | 73                                                | None             | None         |
| C1.10     | 1       | 31  | Female | Negative           | Negative         | No           | No                            | No                      | 2nd dose           |                      | Covid-19 (Moderna)    | 29/6/2021             | 82                                                | None             | None         |
| C1.11     | 1       | 53  | Male   | Negative           | Negative         | No           | No                            | No                      | 2nd dose           |                      | Other vaccine vaccine | 23/5/2021             | 119                                               | None             | None         |
| C1.12     | 1       | 57  | Female | Negative           | Negative         | No           | No                            | No                      | 2nd dose           |                      | Comirnaty (Biontech)  | 21/6/2021             | 90                                                | Cancer           | Chemotherapy |
| C1.13     | 1       | 39  | Female | Negative           | Negative         | No           | No                            | No                      | 2nd dose           |                      | Comirnaty (Biontech)  | 16/7/2021             | 65                                                | None             | None         |
| C1.14     | 1       | 55  | Male   | Negative           | Negative         | No           | No                            | No                      | 2nd dose           |                      | Comirnaty (Biontech)  | 13/7/2021             | 68                                                | None             | None         |
| C1.15     | 1       | 46  | Female | Negative           | Negative         | No           | No                            | No                      | 2nd dose           |                      | Comirnaty (Biontech)  | 29/5/2021             | 113                                               | None             | None         |
| C1.16     | 1       | 45  | Female | Negative           | Negative         | No           | No                            | No                      | 1st dose           | Comirnaty (Biontech) |                       | 12/9/2021             | 7                                                 | None             | None         |
| C1.17     | 1       | 40  | Female | Negative           | Negative         | No           | No                            | No                      | 2nd dose           |                      | Comirnaty (Biontech)  | 18/6/2021             | 93                                                | None             | None         |
| C1.18     | 1       | 51  | Female | Negative           | Negative         | No           | No                            | No                      | 2nd dose           |                      | Comirnaty (Biontech)  | 19/6/2021             | 92                                                | None             | None         |
| C1.19     | 1       | 51  | Female | Negative           | Negative         | No           | No                            | No                      | 2nd dose           |                      | Comirnaty (Biontech)  | 28/5/2021             | 114                                               | Hypertension     | Valsartan    |

|       |   |    |        |          |          |    |        |    |              |                      |                          |           |     |                         |                                      |
|-------|---|----|--------|----------|----------|----|--------|----|--------------|----------------------|--------------------------|-----------|-----|-------------------------|--------------------------------------|
| C1.20 | 1 | 57 | Male   | Negative | Negative | No | Unsure | No | 2nd dose     |                      | Comirnaty (Biontech)     | 10/6/2021 | 101 | Hypertension, psoriasis | Ramipril                             |
| C1.21 | 1 | 64 | Male   | Negative | Negative | No | No     | No | Unvaccinated |                      |                          |           |     | None                    | None                                 |
| C1.22 | 1 | 27 | Female | Negative | Negative | No | No     | No | 2nd dose     |                      | Comirnaty (Biontech)     | 7/6/2021  | 104 | None                    | None                                 |
| C1.23 | 1 | 26 | Male   | Negative | Negative | No | No     | No | 2nd dose     |                      | Vaxzevria (Astra-Zeneca) | 2/6/2021  | 109 | None                    | None                                 |
| C1.24 | 1 | 41 | Female | Negative | Negative | No | Yes    | No | 2nd dose     |                      | Comirnaty (Biontech)     | 8/7/2021  | 73  | None                    | None                                 |
| C1.25 | 1 | 36 | Female | Negative | Negative | No | No     | No | 2nd dose     |                      | Comirnaty (Biontech)     | 21/7/2021 | 60  | Hashimoto               | L-thyroxine                          |
| C1.26 | 1 | 41 | Male   | Negative | Negative | No | No     | No | 2nd dose     |                      | Comirnaty (Biontech)     | 7/7/2021  | 74  | Respiratory disorder    | Formoterol+budesonide                |
| C1.27 | 1 | 31 | Male   | Negative | Negative | No | No     | No | 2nd dose     |                      | Comirnaty (Biontech)     | 23/7/2021 | 58  | None                    | None                                 |
| C1.28 | 1 | 55 | Male   | Negative | Negative | No | No     | No | 2nd dose     |                      | Covid-19 (Moderna)       | 30/4/2021 | 142 | None                    | None                                 |
| C1.29 | 1 | 58 | Male   | Negative | Negative | No | No     | No | 2nd dose     |                      | Comirnaty (Biontech)     | 24/6/2021 | 87  | Hypertension            | Candesartan                          |
| C1.30 | 1 | 52 | Male   | Negative | Negative | No | No     | No | 2nd dose     |                      | Covid-19 (Moderna)       | 19/8/2021 | 31  | None                    | None                                 |
| C1.31 | 1 | 45 | Male   | Negative | Negative | No | Unsure | No | Unvaccinated |                      |                          |           |     | None                    | None                                 |
| C1.32 | 1 | 61 | Male   | Negative | Negative | No | No     | No | 2nd dose     |                      | Comirnaty (Biontech)     | 23/4/2021 | 149 | Heart failure           | Bisoprolol, ramipril, chlorthalidone |
| C1.33 | 1 | 59 | Female | Negative | Negative | No | No     | No | 2nd dose     |                      | Comirnaty (Biontech)     | 27/1/2021 | 235 | None                    | None                                 |
| C1.34 | 1 | 49 | Male   | Negative | Negative | No | No     | No | 2nd dose     |                      | Comirnaty (Biontech)     | 7/5/2021  | 135 | None                    | None                                 |
| C1.35 | 1 | 47 | Female | Negative | Negative | No | No     | No | 1st dose     | Comirnaty (Biontech) |                          | 26/8/2021 | 24  | None                    | None                                 |
| C1.36 | 1 | 30 | Female | Negative | Negative | No | No     | No | 2nd dose     |                      | Comirnaty (Biontech)     | 14/7/2021 | 67  | None                    | None                                 |
| C1.37 | 1 | 44 | Female | Negative | Negative | No | No     | No | 2nd dose     |                      | Comirnaty (Biontech)     | 5/5/2021  | 137 | None                    | None                                 |
| C1.38 | 1 | 43 | Male   | Negative | Negative | No | No     | No | 2nd dose     |                      | Comirnaty (Biontech)     | 22/5/2021 | 120 | None                    | None                                 |
| C1.39 | 1 | 44 | Male   | Negative | Negative | No | Yes    | No | 1st dose     | Comirnaty (Biontech) |                          | 17/9/2021 | 2   | Hypertension            | Ramipril                             |
| C1.40 | 1 | 26 | Female | Negative | Negative | No | No     | No | 2nd dose     |                      | Comirnaty (Biontech)     | 26/5/2021 | 116 | None                    | None                                 |
| C1.41 | 1 | 57 | Female | Negative | Negative | No | No     | No | 2nd dose     | Comirnaty (Biontech) | Comirnaty (Biontech)     | 10/6/2021 | 101 | None                    | None                                 |

|       |   |    |        |          |          |    |    |    |          |  |                          |           |     |                                                            |                                                 |
|-------|---|----|--------|----------|----------|----|----|----|----------|--|--------------------------|-----------|-----|------------------------------------------------------------|-------------------------------------------------|
| C1.42 | 1 | 57 | Male   | Negative | Negative | No | No | No | 2nd dose |  | Comirnaty (Biontech)     | 29/6/2021 | 82  | None                                                       | None                                            |
| C1.43 | 1 | 50 | Female | Negative | Negative | No | No | No | 2nd dose |  | Covid-19 (Moderna)       | 10/6/2021 | 101 | None                                                       | None                                            |
| C1.44 | 1 | 44 | Female | Negative | Negative | No | No | No | 2nd dose |  | Comirnaty (Biontech)     | 29/4/2021 | 143 | Hypertension                                               | Bisoprolol                                      |
| C1.45 | 1 | 57 | Male   | Negative | Negative | No | No | No | 2nd dose |  | Comirnaty (Biontech)     | 28/4/2021 | 144 | Coronary heart disease                                     | Bisoprolol , acetylsalicylic acid , simvastatin |
| C1.46 | 1 | 51 | Male   | Negative | Negative | No | No | No | 2nd dose |  | Comirnaty (Biontech)     | 12/7/2021 | 69  | None                                                       | None                                            |
| C1.47 | 1 | 47 | Female | Negative | Negative | No | No | No | 2nd dose |  | Comirnaty (Biontech)     | 9/6/2021  | 102 | Hashimoto, rheumatoid arthritis                            | L-thyroxine, methotrexate                       |
| C1.48 | 1 | 26 | Male   | Negative | Negative | No | No | No | 2nd dose |  | Comirnaty (Biontech)     | 25/6/2021 | 86  | None                                                       | None                                            |
| C1.49 | 1 | 20 | Female | Negative | Negative | No | No | No | 2nd dose |  | Comirnaty (Biontech)     | 10/6/2021 | 101 | None                                                       | None                                            |
| C1.50 | 1 | 28 | Male   | Negative | Negative | No | No | No | 2nd dose |  | Comirnaty (Biontech)     | 21/8/2021 | 29  | None                                                       | None                                            |
| C1.51 | 1 | 22 | Female | Negative | Negative | No | No | No | 2nd dose |  | Comirnaty (Biontech)     | 17/6/2021 | 94  | None                                                       | None                                            |
| C1.52 | 1 | 35 | Female | Negative | Negative | No | No | No | 2nd dose |  | Comirnaty (Biontech)     | 19/8/2021 | 31  | None                                                       | None                                            |
| C1.53 | 1 | 31 | Female | Negative | Negative | No | No | No | 2nd dose |  | Covid-19 (Moderna)       | 29/6/2021 | 82  | None                                                       | None                                            |
| C1.54 | 1 | 48 | Male   | Negative | Negative | No | No | No | 2nd dose |  | Covid-19 (Moderna)       | 23/6/2021 | 88  | None                                                       | None                                            |
| C1.55 | 1 | 53 | Male   | Negative | Negative | No | No | No | 2nd dose |  | Comirnaty (Biontech)     | 26/5/2021 | 116 | None                                                       | None                                            |
| C1.56 | 1 | 53 | Female | Negative | Negative | No | No | No | 2nd dose |  | Comirnaty (Biontech)     | 23/2/2021 | 208 | None                                                       | None                                            |
| C1.57 | 1 | 57 | Male   | Negative | Negative | No | No | No | 2nd dose |  | Comirnaty (Biontech)     | 27/5/2021 | 115 | Rheumatism                                                 | Ramipril                                        |
| C1.58 | 1 | 57 | Female | Negative | Negative | No | No | No | 2nd dose |  | Comirnaty (Biontech)     | 17/5/2021 | 125 | None                                                       | None                                            |
| C1.59 | 1 | 34 | Female | Negative | Negative | No | No | No | 2nd dose |  | Comirnaty (Biontech)     | 11/5/2021 | 131 | None                                                       | None                                            |
| C1.60 | 1 | 56 | Male   | Negative | Negative | No | No | No | 2nd dose |  | Comirnaty (Biontech)     | 5/7/2021  | 76  | None                                                       | None                                            |
| C1.61 | 1 | 64 | Female | Negative | Negative | No | No | No | 2nd dose |  | Vaxzevria (Astra-Zeneca) | 15/5/2021 | 127 | Hypertension, status post thyroid cancer, allergy, obesity | L-thyroxine, lisinopril, bisoprolol             |

|       |   |     |        |          |          |    |        |    |              |                      |                          |           |     |                                       |                                  |
|-------|---|-----|--------|----------|----------|----|--------|----|--------------|----------------------|--------------------------|-----------|-----|---------------------------------------|----------------------------------|
| C1.62 | 1 | 58  | Male   | Negative | Negative | No | No     | No | 1st dose     | Comirnaty (Biontech) |                          | 21/7/2021 | 60  | None                                  | None                             |
| C1.63 | 1 | 63  | Male   | Negative | Negative | No | Unsure | No | 2nd dose     |                      | Vaxzevria (Astra-Zeneca) | 2/2/2021  | 229 | Hypertension, diabetes, obesity       | Antidiabetics, antihypertensives |
| C1.64 | 1 | 53  | Male   | Negative | Negative | No | No     | No | 1st dose     | Johnson & Johnson    |                          | 15/6/2021 | 96  | None                                  | None                             |
| C1.65 | 1 | 47  | Female | Negative | Negative | No | No     | No | 2nd dose     |                      | Comirnaty (Biontech)     | 8/5/2021  | 134 | Rheumatism                            | None                             |
| C1.66 | 1 | 65  | Female | Negative | Negative | No | No     | No | 2nd dose     |                      | Comirnaty (Biontech)     | 9/7/2021  | 72  | None                                  | None                             |
| C1.67 | 1 | 21  | Male   | Negative | Negative | No | No     | No | Unvaccinated |                      |                          |           |     | None                                  | None                             |
| C1.68 | 1 | 55  | Female | Negative | Negative | No | No     | No | 2nd dose     |                      | Comirnaty (Biontech)     | 10/6/2021 | 101 | Thyroid disorder                      | L-thyroxine                      |
| C1.69 | 1 | 43  | Female | Negative | Negative | No | No     | No | 2nd dose     |                      | Comirnaty (Biontech)     | 22/5/2021 | 120 | Mental disorder/neurological disorder | Lamotrigine                      |
| C1.70 | 1 | 49  | Female | Negative | Negative | No | No     | No | Unvaccinated |                      |                          |           |     | Mental disorder/neurological disorder | Lamotrigine                      |
| C1.71 | 1 | 44  | Female | Negative | Negative | No | No     | No | 2nd dose     |                      | Comirnaty (Biontech)     | 16/6/2021 | 95  | None                                  | None                             |
| C1.72 | 1 | N/A | Male   | Negative | Negative | No | No     | No | 2nd dose     |                      | Comirnaty (Biontech)     | 4/6/2021  | 107 | Hypercholesterolemia                  | Cholesterol reducing medication  |
| C1.73 | 1 | 63  | Female | Negative | Negative | No | No     | No | 2nd dose     |                      | Comirnaty (Biontech)     | 21/6/2021 | 90  | Hypertension                          | Candesartan                      |
| C1.74 | 1 | 47  | Male   | Negative | Negative | No | No     | No | 2nd dose     |                      | Comirnaty (Biontech)     | 9/2/2021  | 222 | None                                  | None                             |
| C1.75 | 1 | 48  | Female | Negative | Negative | No | No     | No | 2nd dose     |                      | Comirnaty (Biontech)     | 11/5/2021 | 131 | None                                  | None                             |
| C1.76 | 1 | 40  | Female | Negative | Negative | No | No     | No | 2nd dose     |                      | Comirnaty (Biontech)     | 3/6/2021  | 108 | None                                  | None                             |
| C1.77 | 1 | 30  | Female | Negative | Negative | No | Yes    | No | Unvaccinated |                      |                          |           |     | None                                  | None                             |
| C1.78 | 1 | 29  | Female | Negative | Negative | No | Yes    | No | 1st dose     | Comirnaty (Biontech) |                          | 28/7/2021 | 53  | None                                  | None                             |
| C1.79 | 1 | 31  | Male   | Negative | Negative | No | No     | No | 2nd dose     |                      | Comirnaty (Biontech)     | 4/6/2021  | 107 | Hypertension, asthma                  | Ramipril                         |
| C1.80 | 1 | 47  | Female | Negative | Negative | No | No     | No | 2nd dose     |                      | Comirnaty (Biontech)     | 14/5/2021 | 128 | None                                  | None                             |
| C1.81 | 1 | 51  | Female | Negative | Negative | No | No     | No | 2nd dose     |                      | Comirnaty (Biontech)     | 14/7/2021 | 67  | None                                  | None                             |

|        |   |    |        |          |          |    |        |    |          |                      |                          |           |     |              |             |
|--------|---|----|--------|----------|----------|----|--------|----|----------|----------------------|--------------------------|-----------|-----|--------------|-------------|
| C1.82  | 1 | 27 | Female | Negative | Negative | No | No     | No | 2nd dose |                      | Comirnaty (Biontech)     | 29/1/2021 | 233 | None         | None        |
| C1.83  | 1 | 30 | Female | Negative | Negative | No | No     | No | 2nd dose | Comirnaty (Biontech) | Comirnaty (Biontech)     | 19/6/2021 | 92  | None         | None        |
| C1.84  | 1 | 60 | Male   | Negative | Negative | No | Unsure | No | 2nd dose |                      | Comirnaty (Biontech)     | 8/7/2021  | 73  | None         | None        |
| C1.85  | 1 | 56 | Female | Negative | Negative | No | Unsure | No | 2nd dose |                      | Comirnaty (Biontech)     | 27/5/2021 | 115 | None         | None        |
| C1.86  | 1 | 21 | Female | Negative | Negative | No | No     | No | 2nd dose |                      | Comirnaty (Biontech)     | 7/7/2021  | 74  | None         | None        |
| C1.87  | 1 | 53 | Male   | Negative | Negative | No | No     | No | 2nd dose |                      | Covid-19 (Moderna)       | 19/6/2021 | 92  | None         | None        |
| C1.88  | 1 | 44 | Female | Negative | Negative | No | No     | No | 2nd dose |                      | Comirnaty (Biontech)     | 29/5/2021 | 113 | None         | None        |
| C1.89  | 1 | 38 | Male   | Negative | Negative | No | No     | No | 2nd dose |                      | Comirnaty (Biontech)     | 12/6/2021 | 99  | None         | None        |
| C1.90  | 1 | 47 | Male   | Negative | Negative | No | No     | No | 2nd dose | Comirnaty (Biontech) | Comirnaty (Biontech)     | 19/6/2021 | 92  | None         | None        |
| C1.91  | 1 | 37 | Female | Negative | Negative | No | No     | No | 2nd dose |                      | Comirnaty (Biontech)     | 12/6/2021 | 99  | None         | None        |
| C1.92  | 1 | 20 | Male   | Negative | Negative | No | No     | No | 2nd dose |                      | Comirnaty (Biontech)     | 9/9/2021  | 10  | None         | None        |
| C1.93  | 1 | 37 | Female | Negative | Negative | No | No     | No | 2nd dose |                      | Covid-19 (Moderna)       | 23/8/2021 | 27  | Hashimoto    | L-thyroxine |
| C1.94  | 1 | 42 | Female | Negative | Negative | No | No     | No | 2nd dose |                      | Comirnaty (Biontech)     | 23/6/2021 | 88  | None         | None        |
| C1.95  | 1 | 33 | Female | Negative | Negative | No | No     | No | 2nd dose |                      | Comirnaty (Biontech)     | 12/6/2021 | 99  | None         | None        |
| C1.96  | 1 | 44 | Male   | Negative | Negative | No | No     | No | 2nd dose |                      | Vaxzevria (Astra-Zeneca) | 14/6/2021 | 97  | None         | None        |
| C1.97  | 1 | 60 | Male   | Negative | Negative | No | Unsure | No | 2nd dose |                      | Comirnaty (Biontech)     | 20/7/2021 | 61  | Hypertension | Candesartan |
| C1.98  | 1 | 74 | Male   | Negative | Negative | No | No     | No | 2nd dose |                      | Comirnaty (Biontech)     | N/A       | N/A | None         | None        |
| C1.99  | 1 | 62 | Female | Negative | Negative | No | No     | No | 2nd dose |                      | Comirnaty (Biontech)     | 22/6/2021 | 89  | None         | None        |
| C1.100 | 1 | 82 | Female | Negative | Negative | No | No     | No | 2nd dose |                      | Comirnaty (Biontech)     | 5/4/2021  | 167 | None         | None        |
| C1.101 | 1 | 52 | Male   | Negative | Negative | No | No     | No | 2nd dose |                      | Comirnaty (Biontech)     | 22/7/2021 | 59  | None         | None        |
| C1.102 | 1 | 37 | Male   | Negative | Negative | No | No     | No | 2nd dose |                      | Comirnaty (Biontech)     | 16/6/2021 | 95  | None         | None        |

|        |   |    |        |          |          |    |    |    |              |  |                          |           |     |                 |                                                     |
|--------|---|----|--------|----------|----------|----|----|----|--------------|--|--------------------------|-----------|-----|-----------------|-----------------------------------------------------|
| C1.103 | 1 | 72 | Female | Negative | Negative | No | No | No | 2nd dose     |  | Vaxzevria (Astra-Zeneca) | 4/7/2021  | 77  | None            | None                                                |
| C1.104 | 1 | 61 | Male   | Negative | Negative | No | No | No | 2nd dose     |  | Covid-19 (Moderna)       | 22/7/2021 | 59  | None            | None                                                |
| C1.105 | 1 | 48 | Male   | Negative | Negative | No | No | No | 2nd dose     |  | Comirnaty (Biontech)     | 8/6/2021  | 103 | Hyperuricemia   | Allopurinol                                         |
| C1.106 | 1 | 19 | Female | Negative | Negative | No | No | No | 2nd dose     |  | Comirnaty (Biontech)     | 16/6/2021 | 95  | None            | None                                                |
| C1.107 | 1 | 19 | Female | Negative | Negative | No | No | No | 2nd dose     |  | Covid-19 (Moderna)       | 4/8/2021  | 46  | None            | None                                                |
| C1.108 | 1 | 43 | Male   | Negative | Negative | No | No | No | 2nd dose     |  | Comirnaty (Biontech)     | 20/6/2021 | 91  | Hypertension    | Bisoprolol, Candesartan                             |
| C1.109 | 1 | 44 | Male   | Negative | Negative | No | No | No | 2nd dose     |  | Comirnaty (Biontech)     | 25/5/2021 | 117 | None            | None                                                |
| C1.110 | 1 | 41 | Female | Negative | Negative | No | No | No | 2nd dose     |  | Comirnaty (Biontech)     | 20/6/2021 | 91  | None            | None                                                |
| C1.111 | 1 | 49 | Male   | Negative | Negative | No | No | No | 2nd dose     |  | Comirnaty (Biontech)     | 14/6/2021 | 97  | None            | None                                                |
| C1.112 | 1 | 44 | Female | Negative | Negative | No | No | No | 2nd dose     |  | Comirnaty (Biontech)     | 1/6/2021  | 110 | Asthma          | Formoterol+budesonide, methasone nasal spray        |
| C1.113 | 1 | 51 | Male   | Negative | Negative | No | No | No | 2nd dose     |  | Comirnaty (Biontech)     | 9/7/2021  | 72  | None            | None                                                |
| C1.114 | 1 | 47 | Male   | Negative | Negative | No | No | No | Unvaccinated |  |                          |           |     | None            | None                                                |
| C1.115 | 1 | 50 | Female | Negative | Negative | No | No | No | 2nd dose     |  | Comirnaty (Biontech)     | 22/6/2021 | 89  | None            | None                                                |
| C1.116 | 1 | 53 | Female | Negative | Negative | No | No | No | 2nd dose     |  | Covid-19 (Moderna)       | 27/7/2021 | 54  | Mental disorder | Venlafaxine, pipamperone, rosuvastatin, mirtazapine |
| C1.117 | 1 | 50 | Male   | Negative | Negative | No | No | No | 2nd dose     |  | Comirnaty (Biontech)     | 20/7/2021 | 61  | None            | None                                                |
| C1.118 | 1 | 48 | Female | Negative | Negative | No | No | No | 2nd dose     |  | Comirnaty (Biontech)     | 14/6/2021 | 97  | None            | None                                                |
| C1.119 | 1 | 32 | Male   | Negative | Negative | No | No | No | 2nd dose     |  | Comirnaty (Biontech)     | 10/8/2021 | 40  | None            | None                                                |
| C1.120 | 1 | 37 | Female | Negative | Negative | No | No | No | 2nd dose     |  | Vaxzevria (Astra-Zeneca) | 18/5/2021 | 124 | None            | None                                                |
| C1.121 | 1 | 57 | Female | Negative | Negative | No | No | No | 2nd dose     |  | Comirnaty (Biontech)     | 7/3/2021  | 196 | None            | None                                                |
| C1.122 | 1 | 23 | Female | Negative | Negative | No | No | No | 2nd dose     |  | Comirnaty (Biontech)     | 22/5/2021 | 120 | None            | None                                                |

|        |   |    |        |          |          |    |    |    |              |                      |                          |           |     |                |                      |
|--------|---|----|--------|----------|----------|----|----|----|--------------|----------------------|--------------------------|-----------|-----|----------------|----------------------|
| C1.123 | 1 | 30 | Male   | Negative | Negative | No | No | No | 2nd dose     |                      | Comirnaty (Biontech)     | 22/5/2021 | 120 | None           | None                 |
| C1.124 | 1 | 26 | Male   | Negative | Negative | No | No | No | 1st dose     | Johnson & Johnson    |                          | 9/6/2021  | 102 | None           | None                 |
| C1.125 | 1 | 53 | Male   | Negative | Negative | No | No | No | 2nd dose     |                      | Comirnaty (Biontech)     | 7/7/2021  | 74  | Hypertension   | Ramipril, bisoprolol |
| C1.126 | 1 | 27 | Female | Negative | Negative | No | No | No | 2nd dose     |                      | Comirnaty (Biontech)     | 8/6/2021  | 103 | None           | None                 |
| C1.127 | 1 | 54 | Female | Negative | Negative | No | No | No | 2nd dose     |                      | Comirnaty (Biontech)     | 8/6/2021  | 103 | None           | None                 |
| C1.128 | 1 | 50 | Female | Negative | Negative | No | No | No | 2nd dose     |                      | Vaxzevria (Astra-Zeneca) | 20/5/2021 | 122 | None           | None                 |
| C1.129 | 1 | 56 | Male   | Negative | Negative | No | No | No | 2nd dose     |                      | Comirnaty (Biontech)     | 8/6/2021  | 103 | None           | None                 |
| C1.130 | 1 | 51 | Male   | Negative | Negative | No | No | No | 2nd dose     |                      | Covid-19 (Moderna)       | 13/5/2021 | 129 | None           | None                 |
| C1.131 | 1 | 48 | Female | Negative | Negative | No | No | No | 2nd dose     |                      | Comirnaty (Biontech)     | 28/5/2021 | 114 | None           | None                 |
| C1.132 | 1 | 31 | Female | Negative | Negative | No | No | No | 2nd dose     | Covid-19 (Moderna)   | Covid-19 (Moderna)       | 27/7/2021 | 54  | None           | None                 |
| C1.133 | 1 | 47 | Female | Negative | Negative | No | No | No | 2nd dose     |                      | Comirnaty (Biontech)     | 14/7/2021 | 67  | Hypothyroidism | L-thyroxine          |
| C1.134 | 1 | 31 | Male   | Negative | Negative | No | No | No | 2nd dose     | Comirnaty (Biontech) | Comirnaty (Biontech)     | 15/7/2021 | 66  | None           | None                 |
| C1.135 | 1 | 20 | Female | Negative | Negative | No | No | No | Unvaccinated |                      |                          |           |     | None           | None                 |
| C1.136 | 1 | 22 | Female | Negative | Negative | No | No | No | 2nd dose     |                      | Comirnaty (Biontech)     | 13/7/2021 | 68  | None           | None                 |
| C1.137 | 1 | 53 | Female | Negative | Negative | No | No | No | 2nd dose     |                      | Comirnaty (Biontech)     | 6/8/2021  | 44  | None           | None                 |
| C1.138 | 1 | 21 | Female | Negative | Negative | No | No | No | 2nd dose     |                      | Covid-19 (Moderna)       | 24/8/2021 | 26  | None           | None                 |
| C1.139 | 1 | 46 | Female | Negative | Negative | No | No | No | 2nd dose     |                      | Comirnaty (Biontech)     | 16/6/2021 | 95  | None           | None                 |
| C1.140 | 1 | 42 | Female | Negative | Negative | No | No | No | 2nd dose     |                      | Comirnaty (Biontech)     | 4/8/2021  | 46  | None           | None                 |
| C1.141 | 1 | 50 | Male   | Negative | Negative | No | No | No | 2nd dose     |                      | Comirnaty (Biontech)     | 7/7/2021  | 74  | Hypertension   | Chlortalidone        |
| C1.142 | 1 | 49 | Male   | Negative | Negative | No | No | No | 2nd dose     |                      | Comirnaty (Biontech)     | 19/6/2021 | 92  | None           | None                 |
| C1.143 | 1 | 38 | Female | Negative | Negative | No | No | No | 2nd dose     |                      | Comirnaty (Biontech)     | 19/6/2021 | 92  | Diabetes       | Metformin, insulin   |
| C1.144 | 1 | 49 | Female | Negative | Negative | No | No | No | 2nd dose     |                      | Comirnaty (Biontech)     | 22/6/2021 | 89  | None           | None                 |

|        |   |    |        |          |          |    |    |    |          |                      |                          |           |     |                           |                                  |
|--------|---|----|--------|----------|----------|----|----|----|----------|----------------------|--------------------------|-----------|-----|---------------------------|----------------------------------|
| C1.145 | 1 | 41 | Female | Negative | Negative | No | No | No | 2nd dose |                      | Comirnaty (Biontech)     | 17/2/2021 | 214 | Gastrointestinal disorder | Lansoprazole                     |
| C1.146 | 1 | 51 | Male   | Negative | Negative | No | No | No | 2nd dose |                      | Vaxzevria (Astra-Zeneca) | 13/6/2021 | 98  | None                      | None                             |
| C1.147 | 1 | 53 | Female | Negative | Negative | No | No | No | 2nd dose |                      | Covid-19 (Moderna)       | 16/8/2021 | 34  | None                      | None                             |
| C1.148 | 1 | 46 | Female | Negative | Negative | No | No | No | 2nd dose |                      | Comirnaty (Biontech)     | 30/6/2021 | 81  | None                      | None                             |
| C1.149 | 1 | 46 | Male   | Negative | Negative | No | No | No | 2nd dose |                      | Covid-19 (Moderna)       | 16/8/2021 | 34  | None                      | None                             |
| C1.150 | 1 | 46 | Female | Negative | Negative | No | No | No | 2nd dose |                      | Comirnaty (Biontech)     | 13/7/2021 | 68  | None                      | None                             |
| C1.151 | 1 | 29 | Male   | Negative | Negative | No | No | No | 2nd dose |                      | Comirnaty (Biontech)     | 12/7/2021 | 69  | None                      | None                             |
| C1.152 | 1 | 52 | Male   | Negative | Negative | No | No | No | 2nd dose |                      | Comirnaty (Biontech)     | 19/6/2021 | 92  | None                      | None                             |
| C1.153 | 1 | 29 | Male   | Negative | Negative | No | No | No | 2nd dose |                      | Johnson & Johnson        | 31/5/2021 | 111 | HIV                       | Etravirine, darunavir, ritonavir |
| C1.154 | 1 | 33 | Male   | Negative | Negative | No | No | No | 2nd dose |                      | Comirnaty (Biontech)     | 1/9/2021  | 18  | None                      | None                             |
| C1.155 | 1 | 56 | Female | Negative | Negative | No | No | No | 2nd dose |                      | Comirnaty (Biontech)     | 25/5/2021 | 117 | Hypertension              | Ramipril                         |
| C1.156 | 1 | 43 | Male   | Negative | Negative | No | No | No | 2nd dose |                      | Comirnaty (Biontech)     | 12/6/2021 | 99  | Hypertension              | Candesartan                      |
| C1.157 | 1 | 21 | Female | Negative | Negative | No | No | No | 2nd dose |                      | Comirnaty (Biontech)     | 21/7/2021 | 60  | None                      | None                             |
| C1.158 | 1 | 28 | Female | Negative | Negative | No | No | No | 2nd dose |                      | Covid-19 (Moderna)       | 25/7/2021 | 56  | None                      | None                             |
| C1.159 | 1 | 25 | Male   | Negative | Negative | No | No | No | 2nd dose |                      | Covid-19 (Moderna)       | 25/7/2021 | 56  | None                      | None                             |
| C1.160 | 1 | 51 | Male   | Negative | Negative | No | No | No | 2nd dose |                      | Covid-19 (Moderna)       | 29/6/2021 | 82  | None                      | None                             |
| C1.161 | 1 | 48 | Female | Negative | Negative | No | No | No | 2nd dose |                      | Covid-19 (Moderna)       | 29/6/2021 | 82  | None                      | None                             |
| C1.162 | 1 | 26 | Female | Negative | Negative | No | No | No | 2nd dose |                      | Comirnaty (Biontech)     | 8/7/2021  | 73  | None                      | None                             |
| C1.163 | 1 | 23 | Female | Negative | Negative | No | No | No | 2nd dose |                      | Comirnaty (Biontech)     | 8/7/2021  | 73  | None                      | None                             |
| C1.164 | 1 | 60 | Male   | Negative | Negative | No | No | No | 2nd dose |                      | Comirnaty (Biontech)     | 24/6/2021 | 87  | None                      | None                             |
| C1.165 | 1 | 53 | Female | Negative | Negative | No | No | No | 2nd dose |                      | Covid-19 (Moderna)       | 24/7/2021 | 57  | None                      | None                             |
| C1.166 | 1 | 41 | Male   | Negative | Negative | No | No | No | 2nd dose | Comirnaty (Biontech) | Comirnaty (Biontech)     | 16/6/2021 | 95  | None                      | None                             |



|        |   |    |        |          |          |    |    |    |              |                          |                      |           |     |                                                              |                                               |
|--------|---|----|--------|----------|----------|----|----|----|--------------|--------------------------|----------------------|-----------|-----|--------------------------------------------------------------|-----------------------------------------------|
| C1.167 | 1 | 32 | Male   | Negative | Negative | No | No | No | 2nd dose     |                          | Comirnaty (Biontech) | 8/7/2021  | 73  | None                                                         | None                                          |
| C1.168 | 1 | 43 | Male   | Negative | Negative | No | No | No | 2nd dose     |                          | Comirnaty (Biontech) | 7/6/2021  | 104 | None                                                         | None                                          |
| C1.169 | 1 | 47 | Female | Negative | Negative | No | No | No | 2nd dose     |                          | Comirnaty (Biontech) | 29/5/2021 | 113 | Hypertension                                                 | Metoprolol                                    |
| C1.170 | 1 | 40 | Female | Negative | Negative | No | No | No | 2nd dose     |                          | Comirnaty (Biontech) | 28/1/2021 | 234 | None                                                         | None                                          |
| C1.171 | 1 | 63 | Female | Negative | Negative | No | No | No | 2nd dose     |                          | Comirnaty (Biontech) | 21/5/2021 | 121 | Hypertension, thyroid disorder                               | L-thyroxine, candesartan                      |
| C1.172 | 1 | 25 | Female | Negative | Negative | No | No | No | 2nd dose     |                          | Comirnaty (Biontech) | 14/5/2021 | 128 | None                                                         | None                                          |
| C1.173 | 1 | 53 | Male   | Negative | Negative | No | No | No | 2nd dose     |                          | Comirnaty (Biontech) | 2/8/2021  | 48  | None                                                         | None                                          |
| C1.174 | 1 | 31 | Female | Negative | Negative | No | No | No | 2nd dose     |                          | Comirnaty (Biontech) | 12/6/2021 | 99  | None                                                         | None                                          |
| C1.175 | 1 | 51 | Female | Negative | Negative | No | No | No | 2nd dose     |                          | Comirnaty (Biontech) | 20/7/2021 | 61  | None                                                         | None                                          |
| C1.176 | 1 | 51 | Male   | Negative | Negative | No | No | No | 2nd dose     |                          | Covid-19 (Moderna)   | 7/7/2021  | 74  | Hypertension, colitis (other than IBD)                       | Bisoprolol, losartan, azathioprine            |
| C1.177 | 1 | 55 | Female | Negative | Negative | No | No | No | 2nd dose     |                          | Comirnaty (Biontech) | 9/6/2021  | 102 | Hypertension, diabetes type II, thyroid disorder, depression | Losartan, metformin, carbimazole, venlafaxine |
| C1.178 | 1 | 44 | Female | Negative | Negative | No | No | No | 2nd dose     |                          | Comirnaty (Biontech) | 8/6/2021  | 103 | None                                                         | None                                          |
| C1.179 | 1 | 50 | Female | Negative | Negative | No | No | No | 2nd dose     | Vaxzevria (Astra-Zeneca) | Comirnaty (Biontech) | 4/8/2021  | 46  | None                                                         | None                                          |
| C1.180 | 1 | 51 | Female | Negative | Negative | No | No | No | 2nd dose     |                          | Johnson & Johnson    | 3/6/2021  | 108 | None                                                         | None                                          |
| C1.181 | 1 | 20 | Female | Negative | Negative | No | No | No | Unvaccinated |                          |                      |           |     | None                                                         | None                                          |
| C1.182 | 1 | 48 | Male   | Negative | Negative | No | No | No | 2nd dose     |                          | Comirnaty (Biontech) | 30/6/2021 | 81  | None                                                         | None                                          |
| C1.183 | 1 | 56 | Male   | Negative | Negative | No | No | No | 2nd dose     |                          | Covid-19 (Moderna)   | 10/8/2021 | 40  | Hypertension, hypercholesterolemia                           | Ramipril, simvastatin                         |
| C1.184 | 1 | 53 | Male   | Negative | Negative | No | No | No | 2nd dose     |                          | Comirnaty (Biontech) | 10/6/2021 | 101 | Hypertension, diabetes, epilepsy                             | Carbamazepin, chlortalidone, candesartan      |
| C1.185 | 1 | 57 | Male   | Negative | Negative | No | No | No | 1st dose     | Johnson & Johnson        |                      | 3/8/2021  | 47  | None                                                         | None                                          |
| C1.186 | 1 | 54 | Female | Negative | Negative | No | No | No | 2nd dose     |                          | Comirnaty (Biontech) | 14/7/2021 | 67  | None                                                         | None                                          |

|        |   |    |        |          |          |    |    |    |          |                      |                          |           |     |                                              |                                                                                       |
|--------|---|----|--------|----------|----------|----|----|----|----------|----------------------|--------------------------|-----------|-----|----------------------------------------------|---------------------------------------------------------------------------------------|
| C1.187 | 1 | 50 | Female | Negative | Negative | No | No | No | 2nd dose | Covid-19 (Moderna)   | Covid-19 (Moderna)       | 21/7/2021 | 60  | None                                         | None                                                                                  |
| C1.188 | 1 | 55 | Female | Negative | Negative | No | No | No | 1st dose | Comirnaty (Biontech) |                          | 18/8/2021 | 32  | Hypertension, hypothyroidism, diverticulitis | Bisoprolol, l-thyroxine                                                               |
| C1.189 | 1 | 54 | Female | Negative | Negative | No | No | No | 2nd dose |                      | Comirnaty (Biontech)     | 15/7/2021 | 66  | None                                         | None                                                                                  |
| C1.190 | 1 | 48 | Male   | Negative | Negative | No | No | No | 2nd dose |                      | Comirnaty (Biontech)     | 24/6/2021 | 87  | None                                         | None                                                                                  |
| C1.191 | 1 | 36 | Female | Negative | Negative | No | No | No | 2nd dose |                      | Comirnaty (Biontech)     | 17/7/2021 | 64  | None                                         | None                                                                                  |
| C1.192 | 1 | 47 | Female | Negative | Negative | No | No | No | 1st dose | Johnson & Johnson    |                          | 16/8/2021 | 34  | None                                         | None                                                                                  |
| C1.193 | 1 | 50 | Male   | Negative | Negative | No | No | No | 2nd dose |                      | Comirnaty (Biontech)     | 23/6/2021 | 88  | None                                         | None                                                                                  |
| C1.194 | 1 | 50 | Male   | Negative | Negative | No | No | No | 1st dose | Johnson & Johnson    |                          | 11/9/2021 | 8   | None                                         | None                                                                                  |
| C1.195 | 1 | 50 | Female | Negative | Negative | No | No | No | 2nd dose |                      | Comirnaty (Biontech)     | 23/6/2021 | 88  | Rheumatism, hypothyroidism                   | Methotrexate, l-thyroxine                                                             |
| C1.196 | 1 | 28 | Female | Negative | Negative | No | No | No | 2nd dose |                      | Comirnaty (Biontech)     | 8/7/2021  | 73  | None                                         | None                                                                                  |
| C1.197 | 1 | 55 | Female | Negative | Negative | No | No | No | 2nd dose |                      | Covid-19 (Moderna)       | 5/5/2021  | 137 | Cardiac arrhythmia                           | Beta-blocker                                                                          |
| C1.198 | 1 | 56 | Female | Negative | Negative | No | No | No | 2nd dose |                      | Comirnaty (Biontech)     | 29/5/2021 | 113 | Hypertension                                 | Amlodipine                                                                            |
| C1.199 | 1 | 51 | Male   | Negative | Negative | No | No | No | 2nd dose |                      | Vaxzevria (Astra-Zeneca) | 5/6/2021  | 106 | Cardiovascular disorder                      | Blood thinner, beta-blocker                                                           |
| C1.200 | 1 | 52 | Female | Negative | Negative | No | No | No | 2nd dose |                      | Comirnaty (Biontech)     | 2/6/2021  | 109 | Gastrointestinal disorder                    | Omeprazole                                                                            |
| C1.201 | 1 | 54 | Female | Negative | Negative | No | No | No | 2nd dose |                      | Comirnaty (Biontech)     | 22/7/2021 | 59  | None                                         | None                                                                                  |
| C1.202 | 1 | 41 | Male   | Negative | Negative | No | No | No | 2nd dose |                      | Comirnaty (Biontech)     | 26/6/2021 | 85  | None                                         | None                                                                                  |
| C1.203 | 1 | 46 | Male   | Negative | Negative | No | No | No | 2nd dose |                      | Comirnaty (Biontech)     | 14/6/2021 | 97  | Hypertension                                 | Ramipril                                                                              |
| C1.204 | 1 | 39 | Female | Negative | Negative | No | No | No | 2nd dose |                      | Comirnaty (Biontech)     | 15/6/2021 | 96  | None                                         | None                                                                                  |
| C1.205 | 1 | 55 | Female | Negative | Negative | No | No | No | 2nd dose |                      | Covid-19 (Moderna)       | 24/6/2021 | 87  | Hypertension, diabetes type 2                | Sitagliptin, rosuvastatin, dapagliflozin+metforminhydrochloride, insulin, dulaglutide |

|        |   |     |        |          |          |    |        |     |          |                          |                      |           |     |                              |                                                                  |
|--------|---|-----|--------|----------|----------|----|--------|-----|----------|--------------------------|----------------------|-----------|-----|------------------------------|------------------------------------------------------------------|
| C1.206 | 1 | 51  | Female | Negative | Negative | No | No     | No  | 1st dose | Johnson & Johnson        |                      | 18/6/2021 | 93  | None                         | None                                                             |
| C1.207 | 1 | 43  | Male   | Negative | Negative | No | No     | No  | 2nd dose |                          | Covid-19 (Moderna)   | 30/6/2021 | 81  | None                         | None                                                             |
| C1.208 | 1 | 41  | Female | Negative | Negative | No | No     | No  | 2nd dose |                          | Covid-19 (Moderna)   | 12/8/2021 | 38  | Asthma                       | Montelukast, formoterol, budesonide, cromoglicic acid+reproterol |
| C1.209 | 1 | 52  | Male   | Negative | Negative | No | Yes    | Yes | 1st dose | Comirnaty (Biontech)     |                      | 31/8/2021 | 19  | Hypertension, hypothyroidism | Candesartan, l-thyroxine                                         |
| C1.210 | 1 | 52  | Female | Negative | Negative | No | Yes    | No  | 1st dose | Comirnaty (Biontech)     |                      | 31/8/2021 | 19  | Hypertension, hypothyroidism | Bisoprolol, l-thyroxine                                          |
| C1.211 | 1 | 40  | Female | Negative | Negative | No | Unsure | No  | 2nd dose |                          | Covid-19 (Moderna)   | 10/6/2021 | 101 | Thyroid disorder             | L-thyroxine                                                      |
| C1.212 | 1 | 36  | Female | Negative | Negative | No | No     | No  | 2nd dose |                          | Comirnaty (Biontech) | 3/7/2021  | 78  | None                         | None                                                             |
| C1.213 | 1 | 45  | Male   | Negative | Negative | No | No     | No  | 2nd dose |                          | Comirnaty (Biontech) | 25/6/2021 | 86  | None                         | None                                                             |
| C1.214 | 1 | 44  | Female | Negative | Negative | No | No     | No  | 2nd dose |                          | Comirnaty (Biontech) | 24/6/2021 | 87  | Hypertension                 | Ramipril                                                         |
| C1.215 | 1 | 40  | Female | Negative | Negative | No | Yes    | No  | 1st dose | Vaxzevria (Astra-Zeneca) |                      | 26/2/2021 | 205 | None                         | None                                                             |
| C1.216 | 1 | 44  | Female | Negative | Negative | No | No     | No  | 2nd dose |                          | Covid-19 (Moderna)   | 10/5/2021 | 132 | None                         | None                                                             |
| C1.217 | 1 | 49  | Male   | Negative | Negative | No | No     | No  | 2nd dose |                          | Comirnaty (Biontech) | 2/6/2021  | 109 | None                         | None                                                             |
| C1.218 | 1 | 48  | Male   | Negative | Negative | No | No     | No  | 2nd dose |                          | Comirnaty (Biontech) | 6/6/2021  | 105 | None                         | None                                                             |
| C1.219 | 1 | 57  | Female | Negative | Negative | No | No     | No  | 2nd dose |                          | Comirnaty (Biontech) | 27/7/2021 | 54  | None                         | None                                                             |
| C1.220 | 1 | 45  | Male   | Negative | Negative | No | No     | No  | 2nd dose |                          | Comirnaty (Biontech) | 15/7/2021 | 66  | None                         | None                                                             |
| C1.221 | 1 | 52  | Male   | Negative | Negative | No | No     | No  | 2nd dose |                          | Comirnaty (Biontech) | 26/6/2021 | 85  | Asthma                       | Formoterol+budesonide                                            |
| C1.222 | 1 | 40  | Female | Negative | Negative | No | No     | No  | 2nd dose |                          | Comirnaty (Biontech) | 7/6/2021  | 104 | None                         | None                                                             |
| C1.223 | 1 | 42  | Female | Negative | Negative | No | Unsure | No  | 2nd dose | Comirnaty (Biontech)     | Comirnaty (Biontech) | 17/8/2021 | 33  | None                         | None                                                             |
| C1.224 | 1 | N/A | Female | Negative | Negative | No | No     | No  | 2nd dose |                          | Comirnaty (Biontech) | 12/7/2021 | 69  | None                         | None                                                             |
| C1.225 | 1 | 53  | Male   | Negative | Negative | No | No     | No  | 2nd dose |                          | Covid-19 (Moderna)   | 11/8/2021 | 39  | None                         | None                                                             |

|        |   |    |        |          |          |    |     |    |              |                      |                          |           |     |                              |                               |
|--------|---|----|--------|----------|----------|----|-----|----|--------------|----------------------|--------------------------|-----------|-----|------------------------------|-------------------------------|
| C1.226 | 1 | 65 | Male   | Negative | Negative | No | No  | No | 2nd dose     |                      | Comirnaty (Biontech)     | 8/7/2021  | 73  | Hypertension, diabetes       | Ramipril                      |
| C1.227 | 1 | 53 | Male   | Negative | Negative | No | No  | No | 2nd dose     |                      | Comirnaty (Biontech)     | 16/6/2021 | 95  | None                         | None                          |
| C1.228 | 1 | 49 | Female | Negative | Negative | No | No  | No | 2nd dose     |                      | Comirnaty (Biontech)     | 9/6/2021  | 102 | None                         | None                          |
| C1.229 | 1 | 55 | Female | Negative | Negative | No | No  | No | 2nd dose     |                      | Comirnaty (Biontech)     | 21/7/2021 | 60  | Hypertension                 | Candesartan, metoprolol       |
| C1.230 | 1 | 52 | Female | Negative | Negative | No | No  | No | 2nd dose     |                      | Comirnaty (Biontech)     | 16/6/2021 | 95  | Hypertension, hypothyroidism | Metoprolol, l-thyroxine       |
| C1.231 | 1 | 47 | Male   | Negative | Negative | No | No  | No | 2nd dose     |                      | Comirnaty (Biontech)     | 5/8/2021  | 45  | None                         | None                          |
| C1.232 | 1 | 56 | Female | Negative | Negative | No | No  | No | 2nd dose     |                      | Covid-19 (Moderna)       | 11/8/2021 | 39  | None                         | None                          |
| C1.233 | 1 | 51 | Female | Negative | Negative | No | No  | No | 2nd dose     |                      | Comirnaty (Biontech)     | 4/6/2021  | 107 | Mental disorder              | Citalopram, lithium carbonate |
| C1.234 | 1 | 44 | Female | Negative | Negative | No | No  | No | 2nd dose     |                      | Comirnaty (Biontech)     | 14/8/2021 | 36  | None                         | None                          |
| C1.235 | 1 | 45 | Female | Negative | Negative | No | No  | No | 2nd dose     | Comirnaty (Biontech) | Comirnaty (Biontech)     | 23/6/2021 | 88  | None                         | None                          |
| C1.236 | 1 | 44 | Female | Negative | Negative | No | Yes | No | 2nd dose     |                      | Covid-19 (Moderna)       | 19/8/2021 | 31  | None                         | None                          |
| C1.237 | 1 | 22 | Male   | Negative | Negative | No | No  | No | 2nd dose     |                      | Vaxzevria (Astra-Zeneca) | 18/8/2021 | 32  | None                         | None                          |
| C1.238 | 1 | 47 | Female | Negative | Negative | No | No  | No | 2nd dose     |                      | Comirnaty (Biontech)     | 15/6/2021 | 96  | None                         | None                          |
| C1.239 | 1 | 54 | Male   | Negative | Negative | No | No  | No | 2nd dose     |                      | Vaxzevria (Astra-Zeneca) | 18/8/2021 | 32  | None                         | None                          |
| C1.240 | 1 | 53 | Male   | Negative | Negative | No | No  | No | 2nd dose     |                      | Vaxzevria (Astra-Zeneca) | 3/6/2021  | 108 | None                         | None                          |
| C1.241 | 1 | 51 | Male   | Negative | Negative | No | No  | No | 2nd dose     |                      | Comirnaty (Biontech)     | 19/5/2021 | 123 | None                         | None                          |
| C1.242 | 1 | 57 | Female | Negative | Negative | No | No  | No | Unvaccinated |                      |                          |           |     | Gastrointestinal disorder    | Pantoprazole                  |
| C1.243 | 1 | 53 | Female | Negative | Negative | No | No  | No | 2nd dose     |                      | Comirnaty (Biontech)     | 3/4/2021  | 169 | None                         | None                          |

|        |   |     |        |          |          |    |     |    |          |                      |                      |           |     |                                                             |                                                                     |
|--------|---|-----|--------|----------|----------|----|-----|----|----------|----------------------|----------------------|-----------|-----|-------------------------------------------------------------|---------------------------------------------------------------------|
| C1.244 | 1 | 59  | Male   | Negative | Negative | No | No  | No | 2nd dose | Covid-19 (Moderna)   | Covid-19 (Moderna)   | 3/6/2021  | 108 | Hypertension, hypercholesterolemia, cardiovascular disorder | Acetylsalicylic acid, prasugrel, bisoprolol, rosuvastatin, ramipril |
| C1.245 | 1 | 45  | Male   | Negative | Negative | No | Yes | No | 1st dose | Covid-19 (Moderna)   |                      | 15/7/2021 | 66  | None                                                        | None                                                                |
| C1.246 | 1 | 52  | Male   | Negative | Negative | No | No  | No | 2nd dose |                      | Comirnaty (Biontech) | 25/5/2021 | 117 | None                                                        | None                                                                |
| C1.247 | 1 | 46  | Male   | Negative | Negative | No | No  | No | 2nd dose |                      | Comirnaty (Biontech) | 9/6/2021  | 102 | None                                                        | None                                                                |
| C1.248 | 1 | 47  | Male   | Negative | Negative | No | No  | No | 2nd dose |                      | Covid-19 (Moderna)   | 4/6/2021  | 107 | None                                                        | None                                                                |
| C1.249 | 1 | 50  | Male   | Negative | Negative | No | No  | No | 2nd dose |                      | Comirnaty (Biontech) | 11/8/2021 | 39  | None                                                        | None                                                                |
| C1.250 | 1 | 47  | Female | Negative | Negative | No | No  | No | 2nd dose |                      | Comirnaty (Biontech) | 3/6/2021  | 108 | None                                                        | None                                                                |
| C1.251 | 1 | 50  | Female | Negative | Negative | No | No  | No | 2nd dose |                      | Comirnaty (Biontech) | 16/7/2021 | 65  | None                                                        | None                                                                |
| C1.252 | 1 | 55  | Male   | Negative | Negative | No | No  | No | 2nd dose |                      | Covid-19 (Moderna)   | 28/7/2021 | 53  | None                                                        | None                                                                |
| C1.253 | 1 | 59  | Female | Negative | Negative | No | No  | No | 2nd dose |                      | Comirnaty (Biontech) | 29/7/2021 | 52  | Hypertension, thyroid disorder                              | L-thyroxine, candesartan                                            |
| C1.254 | 1 | 50  | Male   | Negative | Negative | No | No  | No | 2nd dose |                      | Comirnaty (Biontech) | 22/7/2021 | 59  | Hypertension                                                | Candesartan                                                         |
| C1.255 | 1 | 61  | Male   | Negative | Negative | No | No  | No | 2nd dose |                      | Covid-19 (Moderna)   | 29/5/2021 | 113 | Hyperuricemia                                               | Allupinurool                                                        |
| C1.256 | 1 | 46  | Female | Negative | Negative | No | No  | No | 2nd dose |                      | Comirnaty (Biontech) | 22/7/2021 | 59  | None                                                        | None                                                                |
| C1.257 | 1 | 54  | Female | Negative | Negative | No | No  | No | 2nd dose |                      | Comirnaty (Biontech) | 31/5/2021 | 111 | None                                                        | None                                                                |
| C1.258 | 1 | 34  | Female | Negative | Negative | No | No  | No | 1st dose | Comirnaty (Biontech) |                      | 27/8/2021 | 23  | None                                                        | None                                                                |
| C1.259 | 1 | 38  | Male   | Negative | Negative | No | No  | No | 2nd dose |                      | Johnson & Johnson    | 20/6/2021 | 91  | None                                                        | None                                                                |
| C1.260 | 1 | N/A | Female | Negative | Negative | No | No  | No | 2nd dose |                      | Comirnaty (Biontech) | 22/5/2021 | 120 | None                                                        | None                                                                |
| C1.261 | 1 | 49  | Female | Negative | Negative | No | No  | No | 2nd dose |                      | Comirnaty (Biontech) | 15/6/2021 | 96  | None                                                        | None                                                                |
| C1.262 | 1 | 35  | Female | Negative | Negative | No | No  | No | 2nd dose |                      | Johnson & Johnson    | 20/6/2021 | 91  | None                                                        | None                                                                |
| C1.263 | 1 | 48  | Female | Negative | Negative | No | No  | No | 2nd dose |                      | Comirnaty (Biontech) | 22/5/2021 | 120 | None                                                        | None                                                                |
| C1.264 | 1 | 60  | Female | Negative | Negative | No | No  | No | 2nd dose | Comirnaty (Biontech) | Comirnaty (Biontech) | 18/6/2021 | 93  | Hypertension, thyroid disorder                              | Antihypertensives, l-thyroxine                                      |

|        |   |     |        |          |          |    |        |    |          |                   |                          |           |     |                                             |                                  |
|--------|---|-----|--------|----------|----------|----|--------|----|----------|-------------------|--------------------------|-----------|-----|---------------------------------------------|----------------------------------|
| C1.265 | 1 | 48  | Male   | Negative | Negative | No | No     | No | 2nd dose |                   | Comirnaty (Biontech)     | 22/7/2021 | 59  | None                                        | None                             |
| C1.266 | 1 | 41  | Female | Negative | Negative | No | No     | No | 2nd dose |                   | Covid-19 (Moderna)       | 14/7/2021 | 67  | None                                        | None                             |
| C1.267 | 1 | 40  | Male   | Negative | Negative | No | Unsure | No | 1st dose | Johnson & Johnson |                          | 5/6/2021  | 106 | None                                        | None                             |
| C1.268 | 1 | 50  | Female | Negative | Negative | No | No     | No | 2nd dose |                   | Comirnaty (Biontech)     | 21/5/2021 | 121 | COPD, asthma, hypertension, solitary kidney | Ebastin, candesartan omeprazole  |
| C1.269 | 1 | 42  | Female | Negative | Negative | No | No     | No | 2nd dose |                   | Comirnaty (Biontech)     | 9/6/2021  | 102 | None                                        | None                             |
| C1.270 | 1 | 47  | Male   | Negative | Negative | No | No     | No | 2nd dose |                   | Comirnaty (Biontech)     | N/A       | N/A | Hypertension, hay fever                     | Valsartan                        |
| C1.271 | 1 | 58  | Female | Negative | Negative | No | No     | No | 2nd dose |                   | Comirnaty (Biontech)     | 8/6/2021  | 103 | Mental disorder                             | Lithium carbonate, olanzapine    |
| C1.272 | 1 | 61  | Male   | Negative | Negative | No | No     | No | 2nd dose |                   | Comirnaty (Biontech)     | 26/5/2021 | 116 | None                                        | None                             |
| C1.273 | 1 | 52  | Female | Negative | Negative | No | No     | No | 2nd dose |                   | Comirnaty (Biontech)     | 22/6/2021 | 89  | None                                        | None                             |
| C1.274 | 1 | 43  | Female | Negative | Negative | No | No     | No | 2nd dose |                   | Covid-19 (Moderna)       | 28/4/2021 | 144 | None                                        | None                             |
| C1.275 | 1 | 32  | Female | Negative | Negative | No | No     | No | 2nd dose |                   | Comirnaty (Biontech)     | 28/6/2021 | 83  | None                                        | None                             |
| C1.276 | 1 | 43  | Male   | Negative | Negative | No | No     | No | 2nd dose |                   | Comirnaty (Biontech)     | 8/6/2021  | 103 | Psoriasis                                   | None                             |
| C1.277 | 1 | 32  | Male   | Negative | Negative | No | No     | No | 2nd dose |                   | Comirnaty (Biontech)     | 29/5/2021 | 113 | None                                        | None                             |
| C1.278 | 1 | 39  | Female | Negative | Negative | No | No     | No | 2nd dose |                   | Comirnaty (Biontech)     | 30/4/2021 | 142 | None                                        | None                             |
| C1.279 | 1 | 50  | Male   | Negative | Negative | No | No     | No | 2nd dose |                   | Comirnaty (Biontech)     | 10/6/2021 | 101 | None                                        | None                             |
| C1.280 | 1 | 53  | Female | Negative | Negative | No | No     | No | 2nd dose |                   | Comirnaty (Biontech)     | 19/5/2021 | 123 | None                                        | None                             |
| C1.281 | 1 | 50  | Female | Negative | Negative | No | No     | No | 2nd dose |                   | Comirnaty (Biontech)     | 29/6/2021 | 82  | Heart failure                               | Metoprolol, ramipril, torasemide |
| C1.282 | 1 | 54  | Male   | Negative | Negative | No | No     | No | 2nd dose |                   | Vaxzevria (Astra-Zeneca) | 8/6/2021  | 103 | None                                        | None                             |
| C1.283 | 1 | 20  | Male   | Negative | Negative | No | No     | No | 2nd dose |                   | Comirnaty (Biontech)     | 13/6/2021 | 98  | None                                        | None                             |
| C1.284 | 1 | N/A | Female | Negative | Negative | No | No     | No | 2nd dose |                   | Comirnaty (Biontech)     | 4/5/2021  | 138 | None                                        | None                             |

|        |   |    |        |          |          |    |        |    |          |                      |                          |           |     |                 |                                   |
|--------|---|----|--------|----------|----------|----|--------|----|----------|----------------------|--------------------------|-----------|-----|-----------------|-----------------------------------|
| C1.285 | 1 | 53 | Male   | Negative | Negative | No | No     | No | 2nd dose |                      | Comirnaty (Biontech)     | 18/6/2021 | 93  | None            | None                              |
| C1.286 | 1 | 38 | Female | Negative | Negative | No | No     | No | 2nd dose |                      | Vaxzevria (Astra-Zeneca) | 8/7/2021  | 73  | None            | None                              |
| C1.287 | 1 | 51 | Female | Negative | Negative | No | No     | No | 2nd dose |                      | Comirnaty (Biontech)     | 20/4/2021 | 152 | Hypertension    | Ramipril                          |
| C1.288 | 1 | 48 | Female | Negative | Negative | No | No     | No | 2nd dose |                      | Vaxzevria (Astra-Zeneca) | 8/6/2021  | 103 | None            | None                              |
| C1.289 | 1 | 52 | Female | Negative | Negative | No | No     | No | 2nd dose |                      | Comirnaty (Biontech)     | 8/6/2021  | 103 | Hypertension    | Candesartan, metoprolol           |
| C1.290 | 1 | 74 | Female | Negative | Negative | No | No     | No | 2nd dose |                      | Comirnaty (Biontech)     | 3/5/2021  | 139 | None            | None                              |
| C1.291 | 1 | 51 | Male   | Negative | Negative | No | No     | No | 2nd dose |                      | Comirnaty (Biontech)     | 16/7/2021 | 65  | None            | None                              |
| C1.292 | 1 | 27 | Male   | Negative | Negative | No | No     | No | 2nd dose |                      | Comirnaty (Biontech)     | 25/6/2021 | 86  | None            | None                              |
| C1.293 | 1 | 48 | Female | Negative | Negative | No | No     | No | 2nd dose |                      | Comirnaty (Biontech)     | 21/6/2021 | 90  | Diabetes type 1 | Insulin                           |
| C1.294 | 1 | 42 | Female | Negative | Negative | No | Unsure | No | 2nd dose |                      | Covid-19 (Moderna)       | 31/7/2021 | 50  | None            | None                              |
| C1.295 | 1 | 37 | Female | Negative | Negative | No | No     | No | 2nd dose |                      | Comirnaty (Biontech)     | 4/6/2021  | 107 | None            | None                              |
| C1.296 | 1 | 52 | Female | Negative | Negative | No | No     | No | 2nd dose |                      | Covid-19 (Moderna)       | 10/8/2021 | 40  | None            | None                              |
| C1.297 | 1 | 28 | Female | Negative | Negative | No | No     | No | 2nd dose |                      | Comirnaty (Biontech)     | 8/8/2021  | 42  | None            | None                              |
| C1.298 | 1 | 56 | Male   | Negative | Negative | No | Yes    | No | 2nd dose |                      | Comirnaty (Biontech)     | 4/8/2021  | 46  | Hypertension    | Ramipril                          |
| C1.299 | 1 | 59 | Male   | Negative | Negative | No | No     | No | 2nd dose |                      | Comirnaty (Biontech)     | 9/7/2021  | 72  | Hypertension    | Valsartan, hydrochlorothiazide    |
| C1.300 | 1 | 41 | Female | Negative | Negative | No | Unsure | No | 2nd dose | Comirnaty (Biontech) | Comirnaty (Biontech)     | 22/5/2021 | 120 | None            | Formoterol+budesonide, salbutamol |
| C1.301 | 1 | 41 | Male   | Negative | Negative | No | No     | No | 2nd dose |                      | Comirnaty (Biontech)     | 30/6/2021 | 81  | None            | None                              |
| C1.302 | 1 | 43 | Female | Negative | Negative | No | Unsure | No | 2nd dose |                      | Comirnaty (Biontech)     | 1/7/2021  | 80  | Tachycardia     | Metoprolol                        |
| C1.303 | 1 | 58 | Female | Negative | Negative | No | No     | No | 2nd dose | Comirnaty (Biontech) | Comirnaty (Biontech)     | 4/6/2021  | 107 | Hypertension    | Bisoprolol                        |
| C1.304 | 1 | 68 | Male   | Negative | Negative | No | No     | No | 2nd dose |                      | Comirnaty (Biontech)     | 15/7/2021 | 66  | Asthma          | Formoterol+budesonide             |
| C1.305 | 1 | 46 | Female | Negative | Negative | No | No     | No | 2nd dose |                      | Comirnaty (Biontech)     | 16/7/2021 | 65  | Asthma          | None                              |

|        |   |    |        |          |          |    |    |    |              |                    |                      |           |     |                                                          |                                                                               |
|--------|---|----|--------|----------|----------|----|----|----|--------------|--------------------|----------------------|-----------|-----|----------------------------------------------------------|-------------------------------------------------------------------------------|
| C1.306 | 1 | 43 | Female | Negative | Negative | No | No | No | 2nd dose     |                    | Comirnaty (Biontech) | 21/6/2021 | 90  | None                                                     | None                                                                          |
| C1.307 | 1 | 47 | Male   | Negative | Negative | No | No | No | 2nd dose     |                    | Comirnaty (Biontech) | 9/6/2021  | 102 | Hypertension, asthma                                     | Bisoprolol, formoterol+beclometasone                                          |
| C1.308 | 1 | 44 | Female | Negative | Negative | No | No | No | 2nd dose     |                    | Comirnaty (Biontech) | 21/6/2021 | 90  | Diabetes, hypertension, hypothyroidism, bipolar disorder | L-thyroxine, lithium, ramipril, aripiprazole, sertraline, omeprazole, insulin |
| C1.309 | 1 | 54 | Female | Negative | Negative | No | No | No | 2nd dose     |                    | Comirnaty (Biontech) | 15/7/2021 | 66  | None                                                     | None                                                                          |
| C1.310 | 1 | 48 | Male   | Negative | Negative | No | No | No | 2nd dose     |                    | Comirnaty (Biontech) | 15/8/2021 | 35  | None                                                     | None                                                                          |
| C1.311 | 1 | 32 | Male   | Negative | Negative | No | No | No | 2nd dose     |                    | Johnson & Johnson    | 19/6/2021 | 92  | None                                                     | None                                                                          |
| C1.312 | 1 | 38 | Female | Negative | Negative | No | No | No | 2nd dose     |                    | Covid-19 (Moderna)   | 16/6/2021 | 95  | Diabetes, hypothyroidism, depression                     | L-thyroxine, pantoprazole, bupropion, trazodone                               |
| C1.313 | 1 | 51 | Male   | Negative | Negative | No | No | No | 2nd dose     |                    | Comirnaty (Biontech) | N/A       | N/A | Cardiovascular disorder                                  | Prednisolon, apixaban                                                         |
| C1.314 | 1 | 60 | Male   | Negative | Negative | No | No | No | 2nd dose     |                    | Covid-19 (Moderna)   | 9/8/2021  | 41  | None                                                     | None                                                                          |
| C1.315 | 1 | 55 | Female | Negative | Negative | No | No | No | 2nd dose     |                    | Comirnaty (Biontech) | 12/6/2021 | 99  | Hypertension, hypothyroidism                             | L-thyroxine, valsartan                                                        |
| C1.316 | 1 | 26 | Male   | Negative | Negative | No | No | No | 2nd dose     |                    | Comirnaty (Biontech) | 29/1/2021 | 233 | None                                                     | None                                                                          |
| C1.317 | 1 | 31 | Female | Negative | Negative | No | No | No | 2nd dose     |                    | Comirnaty (Biontech) | 18/6/2021 | 93  | None                                                     | None                                                                          |
| C1.318 | 1 | 68 | Female | Negative | Negative | No | No | No | 2nd dose     |                    | Comirnaty (Biontech) | 3/7/2021  | 78  | None                                                     | None                                                                          |
| C1.319 | 1 | 53 | Male   | Negative | Negative | No | No | No | 2nd dose     |                    | Covid-19 (Moderna)   | 28/7/2021 | 53  | None                                                     | None                                                                          |
| C1.320 | 1 | 55 | Male   | Negative | Negative | No | No | No | 2nd dose     |                    | Covid-19 (Moderna)   | 19/7/2021 | 62  | None                                                     | None                                                                          |
| C1.321 | 1 | 56 | Male   | Negative | Negative | No | No | No | 2nd dose     |                    | Comirnaty (Biontech) | 23/6/2021 | 88  | None                                                     | None                                                                          |
| C1.322 | 1 | 71 | Male   | Negative | Negative | No | No | No | 2nd dose     | Covid-19 (Moderna) | Covid-19 (Moderna)   | 18/5/2021 | 124 | None                                                     | None                                                                          |
| C1.323 | 1 | 47 | Male   | Negative | Negative | No | No | No | 2nd dose     |                    | Johnson & Johnson    | 26/5/2021 | 116 | None                                                     | None                                                                          |
| C1.324 | 1 | 38 | Female | Negative | Negative | No | No | No | 2nd dose     |                    | Comirnaty (Biontech) | 30/6/2021 | 81  | None                                                     | None                                                                          |
| C1.325 | 1 | 48 | Female | Negative | Negative | No | No | No | Unvaccinated |                    |                      |           |     | None                                                     | None                                                                          |



|        |   |    |        |          |          |    |        |    |              |                          |                      |           |     |                                                |                                            |
|--------|---|----|--------|----------|----------|----|--------|----|--------------|--------------------------|----------------------|-----------|-----|------------------------------------------------|--------------------------------------------|
| C1.326 | 1 | 53 | Male   | Negative | Negative | No | Unsure | No | 2nd dose     |                          | Comirnaty (Biontech) | 17/6/2021 | 94  | Hypertension                                   | Ramipril, amlodipine                       |
| C1.327 | 1 | 60 | Male   | Negative | Negative | No | No     | No | 2nd dose     | Comirnaty (Biontech)     | Comirnaty (Biontech) | 19/5/2021 | 123 | None                                           | None                                       |
| C1.328 | 1 | 52 | Female | Negative | Negative | No | No     | No | 2nd dose     |                          | Comirnaty (Biontech) | 16/6/2021 | 95  | Hypothyroidism, alpha-1-antitrypsin deficiency | L-thyroxine                                |
| C1.329 | 1 | 55 | Female | Negative | Negative | No | No     | No | 2nd dose     |                          | Comirnaty (Biontech) | 12/8/2021 | 38  | None                                           | None                                       |
| C1.330 | 1 | 59 | Female | Negative | Negative | No | No     | No | 2nd dose     | Vaxzevria (Astra-Zeneca) | Comirnaty (Biontech) | 16/5/2021 | 126 | Gastrointestinal disorder                      | Paracetamol                                |
| C1.331 | 1 | 37 | Female | Negative | Negative | No | Unsure | No | 2nd dose     | Comirnaty (Biontech)     | Comirnaty (Biontech) | 27/5/2021 | 115 | Celiac disease, insulin resistance             | Metformin                                  |
| C1.332 | 1 | 19 | Male   | Negative | Negative | No | No     | No | Unvaccinated |                          |                      |           |     | None                                           | None                                       |
| C1.333 | 1 | 53 | Male   | Negative | Negative | No | No     | No | 2nd dose     |                          | Johnson & Johnson    | 27/5/2021 | 115 | Hypertension, diabetes                         | Telmisartan+hydrochlorothiazide, amlodipin |
| C1.334 | 1 | 43 | Male   | Negative | Negative | No | No     | No | 2nd dose     |                          | Comirnaty (Biontech) | 16/7/2021 | 65  | Asthma                                         | None                                       |
| C1.335 | 1 | 44 | Male   | Negative | Negative | No | No     | No | 2nd dose     |                          | Comirnaty (Biontech) | 11/6/2021 | 100 | None                                           | None                                       |
| C1.336 | 1 | 51 | Male   | Negative | Negative | No | No     | No | 2nd dose     |                          | Comirnaty (Biontech) | 9/6/2021  | 102 | Diabetes                                       | Atrovastatin, empagliflozin, metformin     |
| C1.337 | 1 | 51 | Female | Negative | Negative | No | Yes    | No | 1st dose     | Comirnaty (Biontech)     |                      | 7/7/2021  | 74  | Diabetes type 2                                | Metformin                                  |
| C1.338 | 1 | 49 | Female | Negative | Negative | No | No     | No | 2nd dose     |                          | Covid-19 (Moderna)   | 16/9/2021 | 3   | Epilepsy                                       | Pregabalin                                 |
| C1.339 | 1 | 62 | Male   | Negative | Negative | No | No     | No | 2nd dose     | Vaxzevria (Astra-Zeneca) | Comirnaty (Biontech) | 19/7/2021 | 62  | None                                           | None                                       |
| C1.340 | 1 | 26 | Male   | Negative | Negative | No | No     | No | 2nd dose     |                          | Comirnaty (Biontech) | 12/7/2021 | 69  | None                                           | None                                       |
| C1.341 | 1 | 48 | Male   | Negative | Negative | No | No     | No | 2nd dose     | Johnson & Johnson        | Johnson & Johnson    | 7/6/2021  | 104 | None                                           | None                                       |
| C1.342 | 1 | 56 | Female | Negative | Negative | No | No     | No | 2nd dose     |                          | Comirnaty (Biontech) | 2/8/2021  | 48  | None                                           | None                                       |
| C1.343 | 1 | 51 | Male   | Negative | Negative | No | No     | No | 2nd dose     |                          | Comirnaty (Biontech) | 14/7/2021 | 67  | None                                           | None                                       |
| C1.344 | 1 | 38 | Female | Negative | Negative | No | No     | No | 2nd dose     |                          | Comirnaty (Biontech) | 14/6/2021 | 97  | None                                           | None                                       |
| C1.345 | 1 | 31 | Male   | Negative | Negative | No | No     | No | 2nd dose     |                          | Covid-19 (Moderna)   | 12/5/2021 | 130 | Diabetes type 1                                | Insulin                                    |

|        |   |    |        |          |          |    |        |    |          |                          |                      |           |     |                                       |              |
|--------|---|----|--------|----------|----------|----|--------|----|----------|--------------------------|----------------------|-----------|-----|---------------------------------------|--------------|
| C1.346 | 1 | 37 | Male   | Negative | Negative | No | No     | No | 2nd dose | Comirnaty (Biontech)     | Comirnaty (Biontech) | 23/6/2021 | 88  | None                                  | None         |
| C1.347 | 1 | 61 | Female | Negative | Negative | No | No     | No | 2nd dose |                          | Comirnaty (Biontech) | 12/6/2021 | 99  | None                                  | None         |
| C1.348 | 1 | 54 | Female | Negative | Negative | No | No     | No | 2nd dose |                          | Comirnaty (Biontech) | 15/7/2021 | 66  | None                                  | None         |
| C1.349 | 1 | 54 | Male   | Negative | Negative | No | No     | No | 2nd dose |                          | Comirnaty (Biontech) | 28/7/2021 | 53  | None                                  | None         |
| C1.350 | 1 | 47 | Male   | Negative | Negative | No | No     | No | 2nd dose |                          | Comirnaty (Biontech) | 6/7/2021  | 75  | None                                  | None         |
| C1.351 | 1 | 50 | Female | Negative | Negative | No | No     | No | 2nd dose |                          | Covid-19 (Moderna)   | 28/7/2021 | 53  | None                                  | None         |
| C1.352 | 1 | 38 | Male   | Negative | Negative | No | Unsure | No | 2nd dose |                          | Comirnaty (Biontech) | 7/7/2021  | 74  | None                                  | None         |
| C1.353 | 1 | 28 | Female | Negative | Negative | No | No     | No | 2nd dose |                          | Comirnaty (Biontech) | 18/6/2021 | 93  | None                                  | None         |
| C1.354 | 1 | 55 | Male   | Negative | Negative | No | No     | No | 2nd dose |                          | Comirnaty (Biontech) | 20/8/2021 | 30  | None                                  | None         |
| C1.355 | 1 | 32 | Male   | Negative | Negative | No | No     | No | 2nd dose |                          | Comirnaty (Biontech) | 26/2/2021 | 205 | None                                  | None         |
| C1.356 | 1 | 61 | Male   | Negative | Negative | No | No     | No | 2nd dose |                          | Comirnaty (Biontech) | 12/6/2021 | 99  | None                                  | None         |
| C1.357 | 1 | 37 | Female | Negative | Negative | No | No     | No | 2nd dose |                          | Comirnaty (Biontech) | 24/5/2021 | 118 | Endometriosis, asthma                 | None         |
| C1.358 | 1 | 47 | Female | Negative | Negative | No | No     | No | 2nd dose |                          | Comirnaty (Biontech) | 12/8/2021 | 38  | None                                  | None         |
| C1.359 | 1 | 39 | Male   | Negative | Negative | No | No     | No | 1st dose | Johnson & Johnson        |                      | 17/6/2021 | 94  | None                                  | None         |
| C1.360 | 1 | 38 | Male   | Negative | Negative | No | No     | No | 2nd dose |                          | Comirnaty (Biontech) | 2/8/2021  | 48  | None                                  | None         |
| C1.361 | 1 | 40 | Male   | Negative | Negative | No | No     | No | 2nd dose |                          | Covid-19 (Moderna)   | 29/4/2021 | 143 | Hypertension                          | Bisoprolol   |
| C1.362 | 1 | 57 | Male   | Negative | Negative | No | No     | No | 2nd dose |                          | Comirnaty (Biontech) | 12/8/2021 | 38  | Thyroid disorder                      | L-thyroxine  |
| C1.363 | 1 | 54 | Male   | Negative | Negative | No | No     | No | 2nd dose |                          | Covid-19 (Moderna)   | 19/7/2021 | 62  | None                                  | None         |
| C1.364 | 1 | 37 | Female | Negative | Negative | No | No     | No | 2nd dose |                          | Comirnaty (Biontech) | 11/6/2021 | 100 | None                                  | None         |
| C1.365 | 1 | 51 | Female | Negative | Negative | No | No     | No | 2nd dose |                          | Comirnaty (Biontech) | 23/6/2021 | 88  | Thyroid disorder                      | L-thyroxine  |
| C1.366 | 1 | 49 | Female | Negative | Negative | No | No     | No | 2nd dose | Vaxzevria (Astra-Zeneca) | Comirnaty (Biontech) | 6/6/2021  | 105 | Mental disorder/neurological disorder | Amitriptylin |
| C1.367 | 1 | 45 | Female | Negative | Negative | No | No     | No | 2nd dose |                          | Comirnaty (Biontech) | 20/5/2021 | 122 | None                                  | None         |

|        |   |    |        |          |          |    |    |    |          |  |                      |           |     |                                                              |                                                      |
|--------|---|----|--------|----------|----------|----|----|----|----------|--|----------------------|-----------|-----|--------------------------------------------------------------|------------------------------------------------------|
| C1.368 | 1 | 45 | Male   | Negative | Negative | No | No | No | 2nd dose |  | Comirnaty (Biontech) | 19/5/2021 | 123 | None                                                         | None                                                 |
| C1.369 | 1 | 53 | Male   | Negative | Negative | No | No | No | 2nd dose |  | Comirnaty (Biontech) | 3/8/2021  | 47  | None                                                         | None                                                 |
| C1.370 | 1 | 59 | Male   | Negative | Negative | No | No | No | 2nd dose |  | Covid-19 (Moderna)   | 18/5/2021 | 124 | Hypertension                                                 | Ramipril                                             |
| C1.371 | 1 | 52 | Male   | Negative | Negative | No | No | No | 2nd dose |  | Comirnaty (Biontech) | 14/7/2021 | 67  | Hypertension, hypothyroidism, alpha-1-antitrypsin deficiency | L-thyroxine, ramipril                                |
| C1.372 | 1 | 35 | Female | Negative | Negative | No | No | No | 2nd dose |  | Comirnaty (Biontech) | 21/7/2021 | 60  | None                                                         | None                                                 |
| C1.373 | 1 | 44 | Female | Negative | Negative | No | No | No | 2nd dose |  | Comirnaty (Biontech) | 3/6/2021  | 108 | None                                                         | None                                                 |
| C1.374 | 1 | 55 | Female | Negative | Negative | No | No | No | 2nd dose |  | Comirnaty (Biontech) | 22/6/2021 | 89  | None                                                         | None                                                 |
| C1.375 | 1 | 48 | Female | Negative | Negative | No | No | No | 2nd dose |  | Comirnaty (Biontech) | 17/6/2021 | 94  | Hypertension                                                 | Candesartan                                          |
| C1.376 | 1 | 54 | Female | Negative | Negative | No | No | No | 2nd dose |  | Covid-19 (Moderna)   | 25/5/2021 | 117 | Hypertension, thyroid removal                                | Candesartan, l-thyroxine                             |
| C1.377 | 1 | 44 | Female | Negative | Negative | No | No | No | 2nd dose |  | Comirnaty (Biontech) | 12/7/2021 | 69  | Hypertension, factor V deficiency, hypothyroidism            | Phenprocoumon, simvastatin, l-thyroxine, candesartan |
| C1.378 | 1 | 53 | Male   | Negative | Negative | No | No | No | 2nd dose |  | Comirnaty (Biontech) | 21/6/2021 | 90  | None                                                         | None                                                 |
| C1.379 | 1 | 42 | Female | Negative | Negative | No | No | No | 2nd dose |  | Comirnaty (Biontech) | 21/6/2021 | 90  | None                                                         | None                                                 |
| C1.380 | 1 | 20 | Male   | Negative | Negative | No | No | No | 2nd dose |  | Johnson & Johnson    | 25/6/2021 | 86  | None                                                         | None                                                 |
| C1.381 | 1 | 58 | Female | Negative | Negative | No | No | No | 2nd dose |  | Comirnaty (Biontech) | 15/6/2021 | 96  | Hypertension                                                 | Losartan                                             |
| C1.382 | 1 | 65 | Female | Negative | Negative | No | No | No | 2nd dose |  | Covid-19 (Moderna)   | 9/8/2021  | 41  | None                                                         | None                                                 |
| C1.383 | 1 | 52 | Female | Negative | Negative | No | No | No | 2nd dose |  | Comirnaty (Biontech) | 5/8/2021  | 45  | None                                                         | None                                                 |
| C1.384 | 1 | 44 | Female | Negative | Negative | No | No | No | 2nd dose |  | Comirnaty (Biontech) | 26/5/2021 | 116 | None                                                         | None                                                 |
| C1.385 | 1 | 46 | Male   | Negative | Negative | No | No | No | 2nd dose |  | Comirnaty (Biontech) | 16/6/2021 | 95  | Hypertension                                                 | Telmisartan                                          |
| C1.386 | 1 | 45 | Female | Negative | Negative | No | No | No | 2nd dose |  | Comirnaty (Biontech) | 5/6/2021  | 106 | None                                                         | None                                                 |
| C1.387 | 1 | 50 | Male   | Negative | Negative | No | No | No | 2nd dose |  | Comirnaty (Biontech) | 21/7/2021 | 60  | None                                                         | None                                                 |

|        |   |    |        |          |          |    |        |    |              |  |                      |           |     |                                               |                                                                      |
|--------|---|----|--------|----------|----------|----|--------|----|--------------|--|----------------------|-----------|-----|-----------------------------------------------|----------------------------------------------------------------------|
| C1.388 | 1 | 40 | Female | Negative | Negative | No | No     | No | 2nd dose     |  | Comirnaty (Biontech) | 20/5/2021 | 122 | None                                          | None                                                                 |
| C1.389 | 1 | 46 | Female | Negative | Negative | No | No     | No | 2nd dose     |  | Comirnaty (Biontech) | 23/6/2021 | 88  | None                                          | None                                                                 |
| C1.390 | 1 | 47 | Female | Negative | Negative | No | No     | No | 2nd dose     |  | Comirnaty (Biontech) | 7/6/2021  | 104 | Willebrand von Jürgens disease                | None                                                                 |
| C1.391 | 1 | 54 | Male   | Negative | Negative | No | No     | No | 2nd dose     |  | Covid-19 (Moderna)   | 28/7/2021 | 53  | Diabetes type 2, hypertension                 | Liraglutide, metoprolol, ramipril, metformin                         |
| C1.392 | 1 | 43 | Female | Negative | Negative | No | No     | No | 2nd dose     |  | Covid-19 (Moderna)   | 11/8/2021 | 39  | None                                          | None                                                                 |
| C1.393 | 1 | 51 | Female | Negative | Negative | No | No     | No | 2nd dose     |  | Comirnaty (Biontech) | 16/6/2021 | 95  | None                                          | None                                                                 |
| C1.394 | 1 | 49 | Female | Negative | Negative | No | No     | No | 2nd dose     |  | Comirnaty (Biontech) | 28/7/2021 | 53  | None                                          | None                                                                 |
| C1.395 | 1 | 55 | Female | Negative | Negative | No | No     | No | 2nd dose     |  | Comirnaty (Biontech) | 11/6/2021 | 100 | Hashimoto                                     | L-thyroxine                                                          |
| C1.396 | 1 | 52 | Female | Negative | Negative | No | Unsure | No | 2nd dose     |  | Comirnaty (Biontech) | 17/6/2021 | 94  | None                                          | None                                                                 |
| C1.397 | 1 | 50 | Female | Negative | Negative | No | No     | No | 2nd dose     |  | Comirnaty (Biontech) | 29/5/2021 | 113 | Hypertension                                  | Candesartan, metoprolol                                              |
| C1.398 | 1 | 42 | Female | Negative | Negative | No | No     | No | Unvaccinated |  |                      |           |     | None                                          | None                                                                 |
| C1.399 | 1 | 55 | Female | Negative | Negative | No | No     | No | 2nd dose     |  | Comirnaty (Biontech) | 16/6/2021 | 95  | None                                          | None                                                                 |
| C1.400 | 1 | 47 | Male   | Negative | Negative | No | No     | No | 2nd dose     |  | Comirnaty (Biontech) | 28/6/2021 | 83  | Hypertension                                  | Ramipril, amlodipine, indapamide, emtricitabin, tenofoviridisoproxil |
| C1.401 | 1 | 47 | Male   | Negative | Negative | No | No     | No | 2nd dose     |  | Covid-19 (Moderna)   | 11/8/2021 | 39  | Epilepsy                                      | Valproic acid                                                        |
| C1.402 | 1 | 42 | Female | Negative | Negative | No | Unsure | No | 2nd dose     |  | Covid-19 (Moderna)   | 10/8/2021 | 40  | Asthma, psoriasis, hypothyroidism, depression | Escitalopram, l-thyroxine, beclomethasone+formoterol, cetirizine     |
| C1.403 | 1 | 51 | Female | Negative | Negative | No | No     | No | 2nd dose     |  | Comirnaty (Biontech) | N/A       | N/A | Rheumatism, arthrosis                         | Methotrexate, sulfasalazine, prednisolone                            |
| C1.404 | 1 | 40 | Female | Negative | Negative | No | No     | No | 2nd dose     |  | Comirnaty (Biontech) | 1/7/2021  | 80  | None                                          | None                                                                 |
| C1.405 | 1 | 55 | Female | Negative | Negative | No | No     | No | 2nd dose     |  | Comirnaty (Biontech) | 17/5/2021 | 125 | None                                          | None                                                                 |
| C1.406 | 1 | 21 | Female | Negative | Negative | No | No     | No | 2nd dose     |  | Comirnaty (Biontech) | 26/2/2021 | 205 | None                                          | None                                                                 |

|        |   |    |        |          |          |    |        |    |          |                      |                      |           |     |                                         |                                                                                                                           |
|--------|---|----|--------|----------|----------|----|--------|----|----------|----------------------|----------------------|-----------|-----|-----------------------------------------|---------------------------------------------------------------------------------------------------------------------------|
| C1.407 | 1 | 49 | Female | Negative | Negative | No | Unsure | No | 2nd dose |                      | Comirnaty (Biontech) | 16/7/2021 | 65  | None                                    | None                                                                                                                      |
| C1.408 | 1 | 57 | Female | Negative | Negative | No | No     | No | 2nd dose |                      | Comirnaty (Biontech) | 16/6/2021 | 95  | Thyroid disorder, neurological disorder | L-thyroxine, topiramate                                                                                                   |
| C1.409 | 1 | 51 | Male   | Negative | Negative | No | No     | No | 2nd dose |                      | Comirnaty (Biontech) | 27/7/2021 | 54  | None                                    | None                                                                                                                      |
| C1.410 | 1 | 55 | Male   | Negative | Negative | No | No     | No | 2nd dose |                      | Comirnaty (Biontech) | 27/5/2021 | 115 | None                                    | None                                                                                                                      |
| C1.411 | 1 | 46 | Male   | Negative | Negative | No | No     | No | 2nd dose |                      | Comirnaty (Biontech) | 29/6/2021 | 82  | None                                    | None                                                                                                                      |
| C1.412 | 1 | 28 | Female | Negative | Negative | No | No     | No | 2nd dose |                      | Comirnaty (Biontech) | 21/6/2021 | 90  | None                                    | None                                                                                                                      |
| C1.413 | 1 | 43 | Female | Negative | Negative | No | No     | No | 2nd dose |                      | Comirnaty (Biontech) | 16/6/2021 | 95  | Multiple sclerosis                      | Glaciramer acetate                                                                                                        |
| C1.414 | 1 | 46 | Male   | Negative | Negative | No | No     | No | 2nd dose |                      | Comirnaty (Biontech) | 23/8/2021 | 27  | None                                    | None                                                                                                                      |
| C1.415 | 1 | 46 | Male   | Negative | Negative | No | No     | No | 2nd dose |                      | Comirnaty (Biontech) | 18/6/2021 | 93  | None                                    | None                                                                                                                      |
| C1.416 | 1 | 52 | Male   | Negative | Negative | No | No     | No | 2nd dose |                      | Comirnaty (Biontech) | 15/6/2021 | 96  | None                                    | None                                                                                                                      |
| C1.417 | 1 | 56 | Male   | Negative | Negative | No | No     | No | 2nd dose |                      | Comirnaty (Biontech) | 1/6/2021  | 110 | None                                    | None                                                                                                                      |
| C1.418 | 1 | 51 | Male   | Negative | Negative | No | No     | No | 2nd dose |                      | Comirnaty (Biontech) | 26/2/2021 | 205 | Hypertension                            | Metoprolol, telmisartan                                                                                                   |
| C1.419 | 1 | 43 | Male   | Negative | Negative | No | No     | No | 2nd dose |                      | Comirnaty (Biontech) | 13/8/2021 | 37  | None                                    | None                                                                                                                      |
| C1.420 | 1 | 49 | Female | Negative | Negative | No | No     | No | 2nd dose |                      | Comirnaty (Biontech) | 31/1/2021 | 231 | None                                    | None                                                                                                                      |
| C1.421 | 1 | 50 | Male   | Negative | Negative | No | No     | No | 2nd dose |                      | Johnson & Johnson    | 26/5/2021 | 116 | None                                    | None                                                                                                                      |
| C1.422 | 1 | 53 | Male   | Negative | Negative | No | Unsure | No | 2nd dose | Covid-19 (Moderna)   | Covid-19 (Moderna)   | 18/5/2021 | 124 | None                                    | None                                                                                                                      |
| C1.423 | 1 | 34 | Female | Negative | Negative | No | No     | No | 2nd dose |                      | Comirnaty (Biontech) | 19/5/2021 | 123 | None                                    | None                                                                                                                      |
| C1.424 | 1 | 60 | Male   | Negative | Negative | No | No     | No | 2nd dose | Comirnaty (Biontech) | Comirnaty (Biontech) | 26/5/2021 | 116 | Heart failure                           | Spirolactone, sacubitrile, valsartan, torasemide, pantoprazole, ivabradine, acetylsalicylic acid, ezetemibe, rosuvastatin |

|        |   |     |        |          |          |     |        |     |              |                          |                      |           |     |                                 |                                                         |     |
|--------|---|-----|--------|----------|----------|-----|--------|-----|--------------|--------------------------|----------------------|-----------|-----|---------------------------------|---------------------------------------------------------|-----|
| C1.425 | 1 | 48  | Male   | Negative | Negative | No  | No     | No  | 2nd dose     |                          | Comirnaty (Biontech) | 8/6/2021  | 103 | None                            | None                                                    |     |
| C1.426 | 1 | 50  | Female | Negative | Negative | No  | No     | No  | 2nd dose     |                          | Comirnaty (Biontech) | 14/7/2021 | 67  | None                            | None                                                    |     |
| C1.427 | 1 | 48  | Female | Negative | Negative | No  | No     | No  | Unvaccinated |                          |                      |           |     | None                            | None                                                    |     |
| C1.428 | 1 | 40  | Male   | Negative | Negative | No  | No     | No  | 2nd dose     |                          | Comirnaty (Biontech) | 15/6/2021 | 96  | None                            | None                                                    |     |
| C1.429 | 1 | 58  | Male   | Negative | Negative | No  | No     | No  | 2nd dose     | Vaxzevria (Astra-Zeneca) | Comirnaty (Biontech) | 17/6/2021 | 94  | None                            | None                                                    |     |
| C1.430 | 1 | 47  | Male   | Negative | Negative | yes | No     | No  | 2nd dose     | Comirnaty (Biontech)     | Comirnaty (Biontech) | 22/6/2021 | 89  | None                            | None                                                    |     |
| C1.431 | 1 | 43  | Female | Negative | Negative | No  | No     | No  | 2nd dose     | Comirnaty (Biontech)     | Comirnaty (Biontech) | 22/6/2021 | 89  | Diabetes, chronic pain syndrome | Tapentadol, metamizole, ibuprofen, acetylsalicylic acid |     |
| C1.432 | 1 | 53  | Male   | Negative | Negative | No  | No     | No  | 2nd dose     |                          | Comirnaty (Biontech) | 29/7/2021 | 52  | None                            | None                                                    |     |
| C1.433 | 1 | 50  | Male   | Negative | Negative | No  | No     | No  | 2nd dose     |                          | Comirnaty (Biontech) | 7/6/2021  | 104 | None                            | None                                                    |     |
| C1.434 | 1 | 52  | Female | Negative | Negative | No  | Unsure | No  | 2nd dose     | Vaxzevria (Astra-Zeneca) | Comirnaty (Biontech) | 14/5/2021 | 128 | None                            | None                                                    |     |
| C1.435 | 1 | N/A | N/A    | Negative | Negative | No  | N/A    | N/A | N/A          | N/A                      | N/A                  | N/A       | N/A | N/A                             | N/A                                                     | N/A |
| C1.436 | 1 | N/A | N/A    | Negative | Negative | No  | N/A    | N/A | N/A          | N/A                      | N/A                  | N/A       | N/A | N/A                             | N/A                                                     | N/A |
| C1.437 | 1 | N/A | N/A    | Negative | Negative | No  | N/A    | N/A | N/A          | N/A                      | N/A                  | N/A       | N/A | N/A                             | N/A                                                     | N/A |
| C1.438 | 1 | N/A | N/A    | Negative | Negative | No  | N/A    | N/A | N/A          | N/A                      | N/A                  | N/A       | N/A | N/A                             | N/A                                                     | N/A |
| C1.439 | 1 | N/A | N/A    | Negative | Negative | No  | N/A    | N/A | N/A          | N/A                      | N/A                  | N/A       | N/A | N/A                             | N/A                                                     | N/A |
| C1.440 | 1 | N/A | N/A    | Negative | Negative | No  | N/A    | N/A | N/A          | N/A                      | N/A                  | N/A       | N/A | N/A                             | N/A                                                     | N/A |
| C1.441 | 1 | N/A | N/A    | Negative | Negative | No  | N/A    | N/A | N/A          | N/A                      | N/A                  | N/A       | N/A | N/A                             | N/A                                                     | N/A |
| C1.442 | 1 | N/A | N/A    | Negative | Negative | No  | N/A    | N/A | N/A          | N/A                      | N/A                  | N/A       | N/A | N/A                             | N/A                                                     | N/A |
| C1.443 | 1 | N/A | N/A    | Negative | Negative | No  | N/A    | N/A | N/A          | N/A                      | N/A                  | N/A       | N/A | N/A                             | N/A                                                     | N/A |
| C1.444 | 1 | N/A | N/A    | Negative | Negative | No  | N/A    | N/A | N/A          | N/A                      | N/A                  | N/A       | N/A | N/A                             | N/A                                                     | N/A |
| C1.445 | 1 | N/A | N/A    | Negative | Negative | No  | N/A    | N/A | N/A          | N/A                      | N/A                  | N/A       | N/A | N/A                             | N/A                                                     | N/A |
| C1.446 | 1 | N/A | N/A    | Negative | Negative | No  | N/A    | N/A | N/A          | N/A                      | N/A                  | N/A       | N/A | N/A                             | N/A                                                     | N/A |
| C1.447 | 1 | N/A | N/A    | Negative | Negative | No  | N/A    | N/A | N/A          | N/A                      | N/A                  | N/A       | N/A | N/A                             | N/A                                                     | N/A |
| C1.448 | 1 | N/A | N/A    | Negative | Negative | No  | N/A    | N/A | N/A          | N/A                      | N/A                  | N/A       | N/A | N/A                             | N/A                                                     | N/A |
| C1.449 | 1 | N/A | N/A    | Negative | Negative | No  | N/A    | N/A | N/A          | N/A                      | N/A                  | N/A       | N/A | N/A                             | N/A                                                     | N/A |
| C1.450 | 1 | N/A | N/A    | Negative | Negative | No  | N/A    | N/A | N/A          | N/A                      | N/A                  | N/A       | N/A | N/A                             | N/A                                                     | N/A |

|        |   |     |        |          |          |    |     |     |          |                      |                      |           |     |      |      |     |
|--------|---|-----|--------|----------|----------|----|-----|-----|----------|----------------------|----------------------|-----------|-----|------|------|-----|
| C1.451 | 1 | N/A | N/A    | Negative | Negative | No | N/A | N/A | N/A      | N/A                  | N/A                  | N/A       | N/A | N/A  | N/A  | N/A |
| C1.452 | 1 | N/A | N/A    | Negative | Negative | No | N/A | N/A | N/A      | N/A                  | N/A                  | N/A       | N/A | N/A  | N/A  | N/A |
| C1.453 | 1 | N/A | N/A    | Negative | Negative | No | N/A | N/A | N/A      | N/A                  | N/A                  | N/A       | N/A | N/A  | N/A  | N/A |
| C1.454 | 1 | N/A | N/A    | Negative | Negative | No | N/A | N/A | N/A      | N/A                  | N/A                  | N/A       | N/A | N/A  | N/A  | N/A |
| C1.455 | 1 | N/A | N/A    | Negative | Negative | No | N/A | N/A | N/A      | N/A                  | N/A                  | N/A       | N/A | N/A  | N/A  | N/A |
| C1.456 | 1 | N/A | N/A    | Negative | Negative | No | N/A | N/A | N/A      | N/A                  | N/A                  | N/A       | N/A | N/A  | N/A  | N/A |
| C1.457 | 1 | N/A | N/A    | Negative | Negative | No | N/A | N/A | N/A      | N/A                  | N/A                  | N/A       | N/A | N/A  | N/A  | N/A |
| C1.458 | 1 | N/A | N/A    | Negative | Negative | No | N/A | N/A | N/A      | N/A                  | N/A                  | N/A       | N/A | N/A  | N/A  | N/A |
| C1.459 | 1 | N/A | N/A    | Negative | Negative | No | N/A | N/A | N/A      | N/A                  | N/A                  | N/A       | N/A | N/A  | N/A  | N/A |
| C1.460 | 1 | N/A | N/A    | Negative | Negative | No | N/A | N/A | N/A      | N/A                  | N/A                  | N/A       | N/A | N/A  | N/A  | N/A |
| C1.461 | 1 | N/A | N/A    | Negative | Negative | No | N/A | N/A | N/A      | N/A                  | N/A                  | N/A       | N/A | N/A  | N/A  | N/A |
| C1.462 | 1 | N/A | N/A    | Negative | Negative | No | N/A | N/A | N/A      | N/A                  | N/A                  | N/A       | N/A | N/A  | N/A  | N/A |
| C1.463 | 1 | N/A | N/A    | Negative | Negative | No | N/A | N/A | N/A      | N/A                  | N/A                  | N/A       | N/A | N/A  | N/A  | N/A |
| C1.464 | 1 | N/A | N/A    | Negative | Negative | No | N/A | N/A | N/A      | N/A                  | N/A                  | N/A       | N/A | N/A  | N/A  | N/A |
| C1.465 | 1 | N/A | N/A    | Negative | Negative | No | N/A | N/A | N/A      | N/A                  | N/A                  | N/A       | N/A | N/A  | N/A  | N/A |
| C1.466 | 1 | N/A | N/A    | Negative | Negative | No | N/A | N/A | N/A      | N/A                  | N/A                  | N/A       | N/A | N/A  | N/A  | N/A |
| C2.1   | 2 | 22  | Female | Negative | Negative | No | No  | No  | 2nd dose | Comirnaty (Biontech) | Comirnaty (Biontech) | 3/7/2021  | 86  | None | None |     |
| C2.2   | 2 | 38  | Female | Negative | Negative | No | No  | No  | 2nd dose | Comirnaty (Biontech) | Comirnaty (Biontech) | 3/7/2021  | 86  | None | None |     |
| C2.3   | 2 | 26  | Female | Negative | Negative | No | No  | No  | 2nd dose | Comirnaty (Biontech) | Comirnaty (Biontech) | 16/7/2021 | 73  | None | None |     |
| C2.4   | 2 | 29  | Male   | Negative | Negative | No | No  | No  | 2nd dose | Comirnaty (Biontech) | Comirnaty (Biontech) | 22/7/2021 | 67  | None | None |     |
| C2.5   | 2 | 34  | Female | Negative | Negative | No | No  | No  | 2nd dose | Covid-19 (Moderna)   | Covid-19 (Moderna)   | 20/5/2021 | 130 | None | None |     |
| C2.6   | 2 | 34  | Female | Negative | Negative | No | No  | No  | 2nd dose | Comirnaty (Biontech) | Comirnaty (Biontech) | 27/1/2021 | 243 | None | None |     |
| C2.7   | 2 | 46  | Male   | Negative | Negative | No | No  | No  | 2nd dose | Comirnaty (Biontech) | Comirnaty (Biontech) | 22/6/2021 | 97  | None | None |     |
| C2.8   | 2 | 30  | Male   | Negative | Negative | No | No  | No  | 1st dose | Johnson & Johnson    |                      | 11/9/2021 | 16  | None | None |     |
| C2.9   | 2 | 36  | Female | Negative | Negative | No | No  | No  | 2nd dose | Comirnaty (Biontech) | Comirnaty (Biontech) | 19/6/2021 | 100 | None | None |     |
| C2.10  | 2 | 30  | Female | Negative | Negative | No | No  | No  | 2nd dose | Comirnaty (Biontech) | Comirnaty (Biontech) | 18/8/2021 | 40  | None | None |     |
| C2.11  | 2 | 22  | Female | Negative | Negative | No | No  | No  | 2nd dose | Comirnaty (Biontech) | Comirnaty (Biontech) | 4/8/2021  | 54  | None | None |     |

|       |   |    |        |          |          |    |        |    |              |                          |                      |           |     |            |                            |
|-------|---|----|--------|----------|----------|----|--------|----|--------------|--------------------------|----------------------|-----------|-----|------------|----------------------------|
| C2.12 | 2 | 31 | Female | Negative | Negative | No | No     | No | 2nd dose     | Covid-19 (Moderna)       | Covid-19 (Moderna)   | 29/6/2021 | 90  | None       | None                       |
| C2.13 | 2 | 26 | Female | Negative | Negative | No | No     | No | 2nd dose     | Vaxzevria (Astra-Zeneca) | Comirnaty (Biontech) | N/A       | N/A | None       | None                       |
| C2.14 | 2 | 52 | Male   | Negative | Negative | No | No     | No | 2nd dose     | Comirnaty (Biontech)     | Comirnaty (Biontech) | 11/6/2021 | 108 | None       | None                       |
| C2.15 | 2 | 43 | Male   | Negative | Negative | No | No     | No | 2nd dose     | Comirnaty (Biontech)     | Comirnaty (Biontech) | 31/5/2021 | 119 | None       | None                       |
| C2.16 | 2 | 55 | Female | Negative | Negative | No | No     | No | 2nd dose     | Covid-19 (Moderna)       | Covid-19 (Moderna)   | 11/6/2021 | 108 | Depression | Promethazine, escitalopram |
| C2.17 | 2 | 24 | Female | Negative | Negative | No | No     | No | 2nd dose     | Covid-19 (Moderna)       | Covid-19 (Moderna)   | 7/6/2021  | 112 | None       | None                       |
| C2.18 | 2 | 50 | Female | Negative | Negative | No | No     | No | 2nd dose     | Comirnaty (Biontech)     | Comirnaty (Biontech) | 8/6/2021  | 111 | None       | None                       |
| C2.19 | 2 | 26 | Male   | Negative | Negative | No | No     | No | 2nd dose     | Covid-19 (Moderna)       | Covid-19 (Moderna)   | 19/7/2021 | 70  | None       | None                       |
| C2.20 | 2 | 22 | Female | Negative | Negative | No | No     | No | 2nd dose     | Comirnaty (Biontech)     | Comirnaty (Biontech) | 1/8/2021  | 57  | None       | None                       |
| C2.21 | 2 | 24 | Male   | Negative | Negative | No | No     | No | 2nd dose     | Comirnaty (Biontech)     | Comirnaty (Biontech) | 1/8/2021  | 57  | None       | None                       |
| C2.22 | 2 | 40 | Female | Negative | Negative | No | No     | No | 2nd dose     | Comirnaty (Biontech)     | Comirnaty (Biontech) | 10/7/2021 | 79  | None       | None                       |
| C2.23 | 2 | 58 | Female | Negative | Negative | No | No     | No | 2nd dose     | Comirnaty (Biontech)     | Comirnaty (Biontech) | 16/6/2021 | 103 | None       | None                       |
| C2.24 | 2 | 31 | Female | Negative | Negative | No | No     | No | 2nd dose     | Comirnaty (Biontech)     | Comirnaty (Biontech) | 17/9/2021 | 10  | None       | None                       |
| C2.25 | 2 | 34 | Female | Negative | Negative | No | No     | No | 2nd dose     | Comirnaty (Biontech)     | Comirnaty (Biontech) | 22/7/2021 | 67  | None       | None                       |
| C2.26 | 2 | 52 | Male   | Negative | Negative | No | Unsure | No | Unvaccinated |                          |                      |           |     | None       | None                       |
| C2.27 | 2 | 40 | Female | Negative | Negative | No | No     | No | Unvaccinated |                          |                      |           |     | None       | None                       |
| C2.28 | 2 | 51 | Female | Negative | Negative | No | No     | No | 2nd dose     | Comirnaty (Biontech)     | Comirnaty (Biontech) | 20/7/2021 | 69  | None       | None                       |
| C2.29 | 2 | 58 | Male   | Negative | Negative | No | No     | No | 1st dose     | Johnson & Johnson        |                      | 16/4/2021 | 164 | None       | None                       |
| C2.30 | 2 | 31 | Male   | Negative | Negative | No | No     | No | 2nd dose     | Comirnaty (Biontech)     | Comirnaty (Biontech) | 20/6/2021 | 99  | None       | None                       |
| C2.31 | 2 | 28 | Male   | Negative | Negative | No | No     | No | 1st dose     | Comirnaty (Biontech)     |                      | 16/9/2021 | 11  | None       | None                       |
| C2.32 | 2 | 56 | Male   | Negative | Negative | No | No     | No | Unvaccinated |                          |                      |           |     | None       | None                       |
| C2.33 | 2 | 53 | Male   | Negative | Negative | No | No     | No | 1st dose     | Johnson & Johnson        |                      | 9/6/2021  | 110 | None       | None                       |
| C2.34 | 2 | 25 | Female | Negative | Negative | No | No     | No | Unvaccinated |                          |                      |           |     | None       | None                       |



|       |   |    |        |          |          |    |        |    |          |                          |                      |           |     |                                        |                                                              |
|-------|---|----|--------|----------|----------|----|--------|----|----------|--------------------------|----------------------|-----------|-----|----------------------------------------|--------------------------------------------------------------|
| C2.35 | 2 | 50 | Male   | Negative | Negative | No | No     | No | 2nd dose | Comirnaty (Biontech)     | Comirnaty (Biontech) | 22/7/2021 | 67  | None                                   | None                                                         |
| C2.36 | 2 | 61 | Male   | Negative | Negative | No | No     | No | 2nd dose | Vaxzevria (Astra-Zeneca) | Comirnaty (Biontech) | 17/7/2021 | 72  | Hypertension                           | Ramipril, diltiazem                                          |
| C2.37 | 2 | 55 | Male   | Negative | Negative | No | No     | No | 2nd dose | Comirnaty (Biontech)     | Comirnaty (Biontech) | N/A       | N/A | Rheumatoide arthritis, mental disorder | Methotrexate, adalimumab, prednisone, pregabalin, duloxetine |
| C2.38 | 2 | 21 | Female | Negative | Negative | No | Yes    | No | 1st dose | Comirnaty (Biontech)     |                      | 3/8/2021  | 55  | None                                   | None                                                         |
| C2.39 | 2 | 28 | Female | Negative | Negative | No | No     | No | 2nd dose | Comirnaty (Biontech)     | Comirnaty (Biontech) | 15/6/2021 | 104 | None                                   | None                                                         |
| C2.40 | 2 | 31 | Female | Negative | Negative | No | No     | No | 2nd dose | Comirnaty (Biontech)     | Comirnaty (Biontech) | 1/8/2021  | 57  | None                                   | None                                                         |
| C2.41 | 2 | 49 | Male   | Negative | Negative | No | No     | No | 1st dose | Johnson & Johnson        |                      | 2/6/2021  | 117 | None                                   | None                                                         |
| C2.42 | 2 | 53 | Male   | Negative | Negative | No | Yes    | No | 2nd dose | Comirnaty (Biontech)     | Comirnaty (Biontech) | 18/6/2021 | 101 | Hypertension                           | Candesartan                                                  |
| C2.43 | 2 | 26 | Male   | Negative | Negative | No | Unsure | No | 2nd dose | Comirnaty (Biontech)     | Comirnaty (Biontech) | 1/8/2021  | 57  | None                                   | None                                                         |
| C2.44 | 2 | 29 | Male   | Negative | Negative | No | No     | No | 2nd dose | Covid-19 (Moderna)       | Covid-19 (Moderna)   | 20/5/2021 | 130 | None                                   | None                                                         |
| C2.45 | 2 | 32 | Female | Negative | Negative | No | No     | No | 2nd dose | Comirnaty (Biontech)     | Comirnaty (Biontech) | 19/5/2021 | 131 | None                                   | None                                                         |
| C2.46 | 2 | 44 | Male   | Negative | Negative | No | No     | No | 2nd dose | Covid-19 (Moderna)       | Covid-19 (Moderna)   | 14/6/2021 | 105 | Hypertension                           | Ramipril, bupropion                                          |
| C2.47 | 2 | 36 | Male   | Negative | Negative | No | No     | No | 2nd dose | Comirnaty (Biontech)     | Comirnaty (Biontech) | 19/2/2021 | 220 | None                                   | None                                                         |
| C2.48 | 2 | 29 | Female | Negative | Negative | No | Unsure | No | 2nd dose | Comirnaty (Biontech)     | Comirnaty (Biontech) | 1/6/2021  | 118 | Bronchial asthma                       | Beclomethasone                                               |
| C2.49 | 2 | 31 | Female | Negative | Negative | No | No     | No | 2nd dose | Comirnaty (Biontech)     | Comirnaty (Biontech) | 17/6/2021 | 102 | None                                   | None                                                         |
| C2.50 | 2 | 46 | Female | Negative | Negative | No | Unsure | No | 2nd dose | Comirnaty (Biontech)     | Comirnaty (Biontech) | 22/7/2021 | 67  | None                                   | None                                                         |
| C2.51 | 2 | 34 | Male   | Negative | Negative | No | No     | No | 2nd dose | Vaxzevria (Astra-Zeneca) | Comirnaty (Biontech) | 4/8/2021  | 54  | None                                   | None                                                         |
| C2.52 | 2 | 42 | Male   | Negative | Negative | No | No     | No | 2nd dose | Comirnaty (Biontech)     | Comirnaty (Biontech) | 22/6/2021 | 97  | None                                   | None                                                         |
| C2.53 | 2 | 42 | Female | Negative | Negative | No | No     | No | 2nd dose | Covid-19 (Moderna)       | Covid-19 (Moderna)   | 10/6/2021 | 109 | None                                   | None                                                         |
| C2.54 | 2 | 44 | Male   | Negative | Negative | No | No     | No | 2nd dose | Comirnaty (Biontech)     | Comirnaty (Biontech) | 8/4/2021  | 172 | None                                   | None                                                         |

|       |   |    |        |          |          |    |     |    |          |                          |                          |           |     |                              |                          |
|-------|---|----|--------|----------|----------|----|-----|----|----------|--------------------------|--------------------------|-----------|-----|------------------------------|--------------------------|
| C2.55 | 2 | 59 | Female | Negative | Negative | No | No  | No | 2nd dose | Vaxzevria (Astra-Zeneca) | Comirnaty (Biontech)     | 10/8/2021 | 48  | None                         | None                     |
| C2.56 | 2 | 32 | Male   | Negative | Negative | No | No  | No | 2nd dose | Comirnaty (Biontech)     | Comirnaty (Biontech)     | 1/8/2021  | 57  | None                         | None                     |
| C2.57 | 2 | 30 | Male   | Negative | Negative | No | No  | No | 2nd dose | Comirnaty (Biontech)     | Comirnaty (Biontech)     | 26/7/2021 | 63  | None                         | None                     |
| C2.58 | 2 | 27 | Female | Negative | Negative | No | No  | No | 2nd dose | Comirnaty (Biontech)     | Comirnaty (Biontech)     | 28/7/2021 | 61  | None                         | None                     |
| C2.59 | 2 | 31 | Female | Negative | Negative | No | No  | No | 2nd dose | Comirnaty (Biontech)     | Comirnaty (Biontech)     | 1/8/2021  | 57  | None                         | None                     |
| C2.60 | 2 | 46 | Female | Negative | Negative | No | No  | No | 2nd dose | Comirnaty (Biontech)     | Comirnaty (Biontech)     | 28/7/2021 | 61  | None                         | None                     |
| C2.61 | 2 | 53 | Male   | Negative | Negative | No | No  | No | 2nd dose | Comirnaty (Biontech)     | Comirnaty (Biontech)     | 8/6/2021  | 111 | None                         | None                     |
| C2.62 | 2 | 59 | Female | Negative | Negative | No | No  | No | 2nd dose | Vaxzevria (Astra-Zeneca) | Vaxzevria (Astra-Zeneca) | 5/5/2021  | 145 | None                         | None                     |
| C2.63 | 2 | 42 | Female | Negative | Negative | No | No  | No | 2nd dose | Comirnaty (Biontech)     | Comirnaty (Biontech)     | 31/5/2021 | 119 | None                         | None                     |
| C2.64 | 2 | 48 | Male   | Negative | Negative | No | No  | No | 2nd dose | Comirnaty (Biontech)     | Comirnaty (Biontech)     | 11/6/2021 | 108 | None                         | None                     |
| C2.65 | 2 | 48 | Male   | Negative | Negative | No | No  | No | 2nd dose | Covid-19 (Moderna)       | Covid-19 (Moderna)       | 9/8/2021  | 49  | None                         | None                     |
| C2.66 | 2 | 47 | Female | Negative | Negative | No | No  | No | 2nd dose | Comirnaty (Biontech)     | Comirnaty (Biontech)     | 6/5/2021  | 144 | Hypertension, hypothyroidism | L-thyroxine, candesartan |
| C2.67 | 2 | 51 | Female | Negative | Negative | No | No  | No | 2nd dose | Comirnaty (Biontech)     | Comirnaty (Biontech)     | 14/7/2021 | 75  | None                         | None                     |
| C2.68 | 2 | 46 | Female | Negative | Negative | No | No  | No | 2nd dose | Comirnaty (Biontech)     | Comirnaty (Biontech)     | 10/6/2021 | 109 | None                         | None                     |
| C2.69 | 2 | 25 | Female | Negative | Negative | No | Yes | No | 1st dose | Covid-19 (Moderna)       |                          | 16/9/2021 | 11  | None                         | None                     |
| C2.70 | 2 | 28 | Male   | Negative | Negative | No | Yes | No | 1st dose | Covid-19 (Moderna)       |                          | 16/9/2021 | 11  | None                         | None                     |
| C2.71 | 2 | 47 | Female | Negative | Negative | No | No  | No | 2nd dose | Comirnaty (Biontech)     | Comirnaty (Biontech)     | 20/7/2021 | 69  | None                         | None                     |
| C2.72 | 2 | 47 | Male   | Negative | Negative | No | No  | No | 2nd dose | Vaxzevria (Astra-Zeneca) | Comirnaty (Biontech)     | 6/8/2021  | 52  | None                         | None                     |
| C2.73 | 2 | 27 | Female | Negative | Negative | No | No  | No | 2nd dose | Comirnaty (Biontech)     | Comirnaty (Biontech)     | 31/3/2021 | 180 | None                         | None                     |
| C2.74 | 2 | 23 | Male   | Negative | Negative | No | No  | No | 2nd dose | Comirnaty (Biontech)     | Comirnaty (Biontech)     | 10/7/2021 | 79  | None                         | None                     |
| C2.75 | 2 | 31 | Female | Negative | Negative | No | No  | No | 2nd dose | Covid-19 (Moderna)       | Covid-19 (Moderna)       | 30/7/2021 | 59  | None                         | None                     |

|       |   |    |        |          |          |    |     |    |          |                          |                      |           |     |              |                   |
|-------|---|----|--------|----------|----------|----|-----|----|----------|--------------------------|----------------------|-----------|-----|--------------|-------------------|
| C2.76 | 2 | 31 | Male   | Negative | Negative | No | No  | No | 2nd dose | Covid-19 (Moderna)       | Covid-19 (Moderna)   | 30/7/2021 | 59  | None         | None              |
| C2.77 | 2 | 29 | Female | Negative | Negative | No | No  | No | 2nd dose | Covid-19 (Moderna)       | Covid-19 (Moderna)   | 8/7/2021  | 81  | None         | None              |
| C2.78 | 2 | 25 | Female | Negative | Negative | No | No  | No | 2nd dose | Comirnaty (Biontech)     | Comirnaty (Biontech) | 11/6/2021 | 108 | None         | None              |
| C2.79 | 2 | 24 | Female | Negative | Negative | No | No  | No | 2nd dose | Vaxzevria (Astra-Zeneca) | Comirnaty (Biontech) | 5/7/2021  | 84  | None         | None              |
| C2.80 | 2 | 33 | Male   | Negative | Negative | No | No  | No | 2nd dose | Comirnaty (Biontech)     | Comirnaty (Biontech) | 13/8/2021 | 45  | None         | None              |
| C2.81 | 2 | 29 | Female | Negative | Negative | No | No  | No | 2nd dose | Comirnaty (Biontech)     | Comirnaty (Biontech) | 20/7/2021 | 69  | None         | None              |
| C2.82 | 2 | 40 | Male   | Negative | Negative | No | No  | No | 2nd dose | Covid-19 (Moderna)       | Comirnaty (Biontech) | 15/7/2021 | 74  | None         | None              |
| C2.83 | 2 | 22 | Male   | Negative | Negative | No | No  | No | 2nd dose | Comirnaty (Biontech)     | Comirnaty (Biontech) | 9/6/2021  | 110 | None         | None              |
| C2.84 | 2 | 27 | Female | Negative | Negative | No | No  | No | 2nd dose | Vaxzevria (Astra-Zeneca) | Comirnaty (Biontech) | 28/5/2021 | 122 | None         | None              |
| C2.85 | 2 | 24 | Female | Negative | Negative | No | No  | No | 2nd dose | Comirnaty (Biontech)     | Comirnaty (Biontech) | 3/2/2021  | 236 | None         | None              |
| C2.86 | 2 | 24 | Female | Negative | Negative | No | No  | No | 2nd dose | Covid-19 (Moderna)       | Covid-19 (Moderna)   | 10/8/2021 | 48  | None         | None              |
| C2.87 | 2 | 26 | Male   | Negative | Negative | No | Yes | No | 1st dose | Johnson & Johnson        |                      | 11/6/2021 | 108 | None         | None              |
| C2.88 | 2 | 28 | Female | Negative | Negative | No | Yes | No | 1st dose | Comirnaty (Biontech)     |                      | 9/6/2021  | 110 | None         | None              |
| C2.89 | 2 | 26 | Male   | Negative | Negative | No | No  | No | 2nd dose | Comirnaty (Biontech)     | Comirnaty (Biontech) | 8/7/2021  | 81  | None         | None              |
| C2.90 | 2 | 52 | Male   | Negative | Negative | No | No  | No | 2nd dose | Comirnaty (Biontech)     | Comirnaty (Biontech) | 15/5/2021 | 135 | None         | None              |
| C2.91 | 2 | 26 | Female | Negative | Negative | No | No  | No | 2nd dose | Comirnaty (Biontech)     | Comirnaty (Biontech) | 8/7/2021  | 81  | None         | None              |
| C2.92 | 2 | 21 | Female | Negative | Negative | No | No  | No | 2nd dose | Comirnaty (Biontech)     | Comirnaty (Biontech) | 1/6/2021  | 118 | None         | None              |
| C2.93 | 2 | 53 | Male   | Negative | Negative | No | No  | No | 2nd dose | Comirnaty (Biontech)     | Comirnaty (Biontech) | 10/7/2021 | 79  | Hypertension | Antihypertensives |
| C2.94 | 2 | 50 | Female | Negative | Negative | No | No  | No | 2nd dose | Vaxzevria (Astra-Zeneca) | Comirnaty (Biontech) | 23/6/2021 | 96  | None         | None              |
| C2.95 | 2 | 33 | Female | Negative | Negative | No | No  | No | 2nd dose | Comirnaty (Biontech)     | Comirnaty (Biontech) | 10/6/2021 | 109 | Hashimoto    | L-thyroxine       |
| C2.96 | 2 | 23 | Female | Negative | Negative | No | No  | No | 2nd dose | Comirnaty (Biontech)     | Comirnaty (Biontech) | 17/6/2021 | 102 | None         | None              |

|        |   |    |        |          |          |    |     |    |              |                          |                      |           |     |                                              |                                                |
|--------|---|----|--------|----------|----------|----|-----|----|--------------|--------------------------|----------------------|-----------|-----|----------------------------------------------|------------------------------------------------|
| C2.97  | 2 | 21 | Female | Negative | Negative | No | No  | No | 2nd dose     | Comirnaty (Biontech)     | Comirnaty (Biontech) | 21/5/2021 | 129 | None                                         | None                                           |
| C2.98  | 2 | 22 | Female | Negative | Negative | No | No  | No | 2nd dose     | Comirnaty (Biontech)     | Comirnaty (Biontech) | 11/5/2021 | 139 | Hashimoto, endometriosis                     | L-thyroxine, sertraline                        |
| C2.99  | 2 | 29 | Male   | Negative | Negative | No | No  | No | 1st dose     | Johnson & Johnson        |                      | 9/6/2021  | 110 | None                                         | None                                           |
| C2.100 | 2 | 32 | Male   | Negative | Negative | No | No  | No | 2nd dose     | Covid-19 (Moderna)       | Comirnaty (Biontech) | 21/7/2021 | 68  | None                                         | None                                           |
| C2.101 | 2 | 28 | Female | Negative | Negative | No | No  | No | 2nd dose     | Comirnaty (Biontech)     | Comirnaty (Biontech) | 3/8/2021  | 55  | None                                         | None                                           |
| C2.102 | 2 | 37 | Female | Negative | Negative | No | No  | No | 2nd dose     | Comirnaty (Biontech)     | Comirnaty (Biontech) | 15/6/2021 | 104 | None                                         | None                                           |
| C2.103 | 2 | 57 | Male   | Negative | Negative | No | No  | No | 2nd dose     | Comirnaty (Biontech)     | Comirnaty (Biontech) | 10/6/2021 | 109 | Glaucoma                                     | Latanoprost, timolol, rivaroxaban              |
| C2.104 | 2 | 23 | Female | Negative | Negative | No | No  | No | 2nd dose     | Comirnaty (Biontech)     | Comirnaty (Biontech) | 14/7/2021 | 75  | None                                         | None                                           |
| C2.105 | 2 | 24 | Female | Negative | Negative | No | No  | No | 2nd dose     | Comirnaty (Biontech)     | Comirnaty (Biontech) | 14/7/2021 | 75  | None                                         | None                                           |
| C2.106 | 2 | 22 | Female | Negative | Negative | No | No  | No | 2nd dose     | Vaxzevria (Astra-Zeneca) | Comirnaty (Biontech) | 9/7/2021  | 80  | None                                         | None                                           |
| C2.107 | 2 | 30 | Male   | Negative | Negative | No | No  | No | 2nd dose     | Comirnaty (Biontech)     | Comirnaty (Biontech) | 13/8/2021 | 45  | None                                         | None                                           |
| C2.108 | 2 | 50 | Female | Negative | Negative | No | Yes | No | 1st dose     | Comirnaty (Biontech)     |                      | 21/7/2021 | 68  | Osteoporosis                                 | Hormones (menopause)                           |
| C2.109 | 2 | 53 | Male   | Negative | Negative | No | No  | No | 2nd dose     | Comirnaty (Biontech)     | Comirnaty (Biontech) | 22/5/2021 | 128 | None                                         | None                                           |
| C2.110 | 2 | 38 | Male   | Negative | Negative | No | No  | No | 2nd dose     | Vaxzevria (Astra-Zeneca) | Comirnaty (Biontech) | 28/7/2021 | 61  | None                                         | None                                           |
| C2.111 | 2 | 30 | Female | Negative | Negative | No | No  | No | 2nd dose     | Comirnaty (Biontech)     | Comirnaty (Biontech) | 4/6/2021  | 115 | Hypertension, primary sclerosing cholangitis | Ramipril, ursodesoxycholic acid, chlortalidone |
| C2.112 | 2 | 18 | Female | Negative | Negative | No | No  | No | 2nd dose     | Comirnaty (Biontech)     | Comirnaty (Biontech) | 28/7/2021 | 61  | None                                         | None                                           |
| C2.113 | 2 | 37 | Female | Negative | Negative | No | No  | No | 2nd dose     | Comirnaty (Biontech)     | Comirnaty (Biontech) | N/A       | N/A | Hypertension                                 | ACE-inhibitor, beta-blocker                    |
| C2.114 | 2 | 19 | Female | Negative | Negative | No | No  | No | 2nd dose     | Comirnaty (Biontech)     | Comirnaty (Biontech) | 30/6/2021 | 89  | None                                         | None                                           |
| C2.115 | 2 | 26 | Female | Negative | Negative | No | No  | No | Unvaccinated |                          |                      |           |     | None                                         | None                                           |
| C2.116 | 2 | 61 | Female | Negative | Negative | No | No  | No | 2nd dose     | Vaxzevria (Astra-Zeneca) | Comirnaty (Biontech) | 9/7/2021  | 80  | None                                         | None                                           |

|        |   |    |        |          |          |    |    |    |              |                          |                          |           |     |                      |                         |
|--------|---|----|--------|----------|----------|----|----|----|--------------|--------------------------|--------------------------|-----------|-----|----------------------|-------------------------|
| C2.117 | 2 | 33 | Female | Negative | Negative | No | No | No | 2nd dose     | Comirnaty (Biontech)     | Comirnaty (Biontech)     | 10/6/2021 | 109 | None                 | None                    |
| C2.118 | 2 | 56 | Female | Negative | Negative | No | No | No | 2nd dose     | Comirnaty (Biontech)     | Comirnaty (Biontech)     | 26/7/2021 | 63  | Hypertension         | Ramipril, Atorvastatin  |
| C2.119 | 2 | 38 | Female | Negative | Negative | No | No | No | 2nd dose     | Comirnaty (Biontech)     | Comirnaty (Biontech)     | 9/6/2021  | 110 | None                 | None                    |
| C2.120 | 2 | 50 | Male   | Negative | Negative | No | No | No | Unvaccinated |                          |                          |           |     | None                 | None                    |
| C2.121 | 2 | 28 | Female | Negative | Negative | No | No | No | 2nd dose     | Covid-19 (Moderna)       | Covid-19 (Moderna)       | 19/7/2021 | 70  | None                 | None                    |
| C2.122 | 2 | 24 | Male   | Negative | Negative | No | No | No | 2nd dose     | Comirnaty (Biontech)     | Comirnaty (Biontech)     | 19/6/2021 | 100 | None                 | None                    |
| C2.123 | 2 | 60 | Male   | Negative | Negative | No | No | No | 2nd dose     | Comirnaty (Biontech)     | Comirnaty (Biontech)     | 5/6/2021  | 114 | Hypertension         | Candesartan             |
| C2.124 | 2 | 56 | Female | Negative | Negative | No | No | No | 2nd dose     | Comirnaty (Biontech)     | Comirnaty (Biontech)     | 29/5/2021 | 121 | None                 | None                    |
| C2.125 | 2 | 28 | Female | Negative | Negative | No | No | No | 2nd dose     | Comirnaty (Biontech)     | Comirnaty (Biontech)     | 26/6/2021 | 93  | Crohn's disease      | None                    |
| C2.126 | 2 | 28 | Male   | Negative | Negative | No | No | No | 2nd dose     | Comirnaty (Biontech)     | Comirnaty (Biontech)     | 5/6/2021  | 114 | None                 | None                    |
| C2.127 | 2 | 31 | Male   | Negative | Negative | No | No | No | 2nd dose     | Comirnaty (Biontech)     | Comirnaty (Biontech)     | 4/6/2021  | 115 | Hypertension         | Ramipril                |
| C2.128 | 2 | 51 | Male   | Negative | Negative | No | No | No | 2nd dose     | Vaxzevria (Astra-Zeneca) | Vaxzevria (Astra-Zeneca) | 21/7/2021 | 68  | None                 | None                    |
| C2.129 | 2 | 44 | Female | Negative | Negative | No | No | No | 2nd dose     | Vaxzevria (Astra-Zeneca) | Vaxzevria (Astra-Zeneca) | 15/5/2021 | 135 | None                 | None                    |
| C2.130 | 2 | 46 | Female | Negative | Negative | No | No | No | 2nd dose     | Comirnaty (Biontech)     | Comirnaty (Biontech)     | 8/6/2021  | 111 | None                 | None                    |
| C2.131 | 2 | 48 | Female | Negative | Negative | No | No | No | 2nd dose     | Comirnaty (Biontech)     | Comirnaty (Biontech)     | 29/5/2021 | 121 | Hashimoto            | L-thyroxine             |
| C2.132 | 2 | 38 | Female | Negative | Negative | No | No | No | 2nd dose     | Comirnaty (Biontech)     | Comirnaty (Biontech)     | 29/5/2021 | 121 | Diabetes type 1      | None                    |
| C2.133 | 2 | 27 | Female | Negative | Negative | No | No | No | 2nd dose     | Vaxzevria (Astra-Zeneca) | Vaxzevria (Astra-Zeneca) | 3/5/2021  | 147 | None                 | None                    |
| C2.134 | 2 | 29 | Male   | Negative | Negative | No | No | No | 2nd dose     | Comirnaty (Biontech)     | Comirnaty (Biontech)     | 9/8/2021  | 49  | None                 | None                    |
| C2.135 | 2 | 54 | Female | Negative | Negative | No | No | No | 2nd dose     | Comirnaty (Biontech)     | Comirnaty (Biontech)     | 9/6/2021  | 110 | Rheumatoid arthritis | Methotrexate, cortisone |
| C2.136 | 2 | 50 | Female | Negative | Negative | No | No | No | 2nd dose     | Covid-19 (Moderna)       | Covid-19 (Moderna)       | 13/5/2021 | 137 | None                 | None                    |
| C2.137 | 2 | 26 | Female | Negative | Negative | No | No | No | 2nd dose     | Comirnaty (Biontech)     | Comirnaty (Biontech)     | 25/6/2021 | 94  | None                 | None                    |

|        |   |    |        |          |          |    |        |    |              |                          |                      |           |     |                               |                        |
|--------|---|----|--------|----------|----------|----|--------|----|--------------|--------------------------|----------------------|-----------|-----|-------------------------------|------------------------|
| C2.138 | 2 | 60 | Female | Negative | Negative | No | No     | No | 2nd dose     | Comirnaty (Biontech)     | Comirnaty (Biontech) | 28/5/2021 | 122 | None                          | None                   |
| C2.139 | 2 | 49 | Female | Negative | Negative | No | No     | No | 2nd dose     | Comirnaty (Biontech)     | Comirnaty (Biontech) | 24/6/2021 | 95  | None                          | None                   |
| C2.140 | 2 | 30 | Female | Negative | Negative | No | No     | No | 2nd dose     | Vaxzevria (Astra-Zeneca) | Comirnaty (Biontech) | 21/7/2021 | 68  | None                          | None                   |
| C2.141 | 2 | 45 | Female | Negative | Negative | No | No     | No | 2nd dose     | Comirnaty (Biontech)     | Comirnaty (Biontech) | 1/7/2021  | 88  | None                          | None                   |
| C2.142 | 2 | 24 | Male   | Negative | Negative | No | No     | No | 2nd dose     | Comirnaty (Biontech)     | Comirnaty (Biontech) | 13/7/2021 | 76  | None                          | None                   |
| C2.143 | 2 | 24 | Female | Negative | Negative | No | No     | No | Unvaccinated |                          |                      |           |     | None                          | None                   |
| C2.144 | 2 | 60 | Male   | Negative | Negative | No | Yes    | No | 2nd dose     | Comirnaty (Biontech)     | Comirnaty (Biontech) | 22/7/2021 | 67  | Hypertension                  | Ramipril, pantoprazole |
| C2.145 | 2 | 21 | Female | Negative | Negative | No | No     | No | 2nd dose     | Comirnaty (Biontech)     | Comirnaty (Biontech) | 21/7/2021 | 68  | None                          | None                   |
| C2.146 | 2 | 36 | Male   | Negative | Negative | No | No     | No | 2nd dose     | Vaxzevria (Astra-Zeneca) | Comirnaty (Biontech) | 2/9/2021  | 25  | None                          | None                   |
| C2.147 | 2 | 32 | Female | Negative | Negative | No | No     | No | 2nd dose     | Covid-19 (Moderna)       | Covid-19 (Moderna)   | 20/8/2021 | 38  | None                          | None                   |
| C2.148 | 2 | 37 | Female | Negative | Negative | No | No     | No | 2nd dose     | Comirnaty (Biontech)     | Comirnaty (Biontech) | 9/6/2021  | 110 | Factor II and VIII deficiency | Apixaban               |
| C2.149 | 2 | 37 | Female | Negative | Negative | No | No     | No | 2nd dose     | Comirnaty (Biontech)     | Comirnaty (Biontech) | 5/8/2021  | 53  | None                          | None                   |
| C2.150 | 2 | 31 | Male   | Negative | Negative | No | No     | No | 2nd dose     | Comirnaty (Biontech)     | Comirnaty (Biontech) | 4/8/2021  | 54  | None                          | None                   |
| C2.151 | 2 | 42 | Female | Negative | Negative | No | Unsure | No | 2nd dose     | Comirnaty (Biontech)     | Comirnaty (Biontech) | 15/9/2021 | 12  | None                          | None                   |
| C2.152 | 2 | 45 | Female | Negative | Negative | No | No     | No | 2nd dose     | Comirnaty (Biontech)     | Comirnaty (Biontech) | 3/8/2021  | 55  | None                          | None                   |
| C2.153 | 2 | 50 | Female | Negative | Negative | No | No     | No | 2nd dose     | Comirnaty (Biontech)     | Comirnaty (Biontech) | 20/7/2021 | 69  | Thyroid disorder              | L-thyroxine            |
| C2.154 | 2 | 40 | Female | Negative | Negative | No | No     | No | 2nd dose     | Vaxzevria (Astra-Zeneca) | Comirnaty (Biontech) | 7/5/2021  | 143 | None                          | None                   |
| C2.155 | 2 | 28 | Female | Negative | Negative | No | No     | No | 2nd dose     | Comirnaty (Biontech)     | Comirnaty (Biontech) | 23/6/2021 | 96  | None                          | None                   |
| C2.156 | 2 | 35 | Female | Negative | Negative | No | No     | No | 2nd dose     | Comirnaty (Biontech)     | Comirnaty (Biontech) | 8/7/2021  | 81  | Epilepsy                      | Lamotrigin             |
| C2.157 | 2 | 51 | Female | Negative | Negative | No | No     | No | 2nd dose     | Comirnaty (Biontech)     | Comirnaty (Biontech) | 4/6/2021  | 115 | None                          | None                   |
| C2.158 | 2 | 60 | Male   | Negative | Negative | No | No     | No | 2nd dose     | Comirnaty (Biontech)     | Comirnaty (Biontech) | 30/5/2021 | 120 | None                          | None                   |

|        |   |    |        |          |          |    |    |    |              |                      |                      |           |     |                      |                                                                      |
|--------|---|----|--------|----------|----------|----|----|----|--------------|----------------------|----------------------|-----------|-----|----------------------|----------------------------------------------------------------------|
| C2.159 | 2 | 33 | Female | Negative | Negative | No | No | No | 2nd dose     | Covid-19 (Moderna)   | Covid-19 (Moderna)   | 19/7/2021 | 70  | None                 | None                                                                 |
| C2.160 | 2 | 47 | Female | Negative | Negative | No | No | No | 2nd dose     | Covid-19 (Moderna)   | Covid-19 (Moderna)   | 27/7/2021 | 62  | None                 | None                                                                 |
| C2.161 | 2 | 27 | Female | Negative | Negative | No | No | No | 2nd dose     | Comirnaty (Biontech) | Comirnaty (Biontech) | 9/7/2021  | 80  | None                 | None                                                                 |
| C2.162 | 2 | 30 | Female | Negative | Negative | No | No | No | 2nd dose     | Covid-19 (Moderna)   | Covid-19 (Moderna)   | 28/7/2021 | 61  | None                 | None                                                                 |
| C2.163 | 2 | 28 | Female | Negative | Negative | No | No | No | 2nd dose     | Comirnaty (Biontech) | Comirnaty (Biontech) | 9/2/2021  | 230 | None                 | None                                                                 |
| C2.164 | 2 | 36 | Female | Negative | Negative | No | No | No | 2nd dose     | Comirnaty (Biontech) | Comirnaty (Biontech) | 11/2/2021 | 228 | None                 | None                                                                 |
| C2.165 | 2 | 47 | Female | Negative | Negative | No | No | No | 2nd dose     | Covid-19 (Moderna)   | Covid-19 (Moderna)   | 30/4/2021 | 150 | None                 | None                                                                 |
| C2.166 | 2 | 20 | Female | Negative | Negative | No | No | No | 2nd dose     | Comirnaty (Biontech) | Comirnaty (Biontech) | 10/6/2021 | 109 | None                 | None                                                                 |
| C2.167 | 2 | 22 | Female | Negative | Negative | No | No | No | 2nd dose     | Comirnaty (Biontech) | Comirnaty (Biontech) | 30/7/2021 | 59  | None                 | None                                                                 |
| C2.168 | 2 | 50 | Female | Negative | Negative | No | No | No | 2nd dose     | Comirnaty (Biontech) | Comirnaty (Biontech) | 25/2/2021 | 214 | Thyroid disorder     | L-thyroxine                                                          |
| C2.169 | 2 | 51 | Female | Negative | Negative | No | No | No | 2nd dose     | Comirnaty (Biontech) | Comirnaty (Biontech) | 14/6/2021 | 105 | Hashimoto            | L-thyroxine                                                          |
| C2.170 | 2 | 25 | Female | Negative | Negative | No | No | No | 2nd dose     | Comirnaty (Biontech) | Comirnaty (Biontech) | 8/7/2021  | 81  | Respiratory disorder | Salmeterol+fluticasone, potassium iodide, montelukast, desloratadine |
| C2.171 | 2 | 26 | Female | Negative | Negative | No | No | No | Unvaccinated |                      |                      |           |     | None                 | None                                                                 |
| C2.172 | 2 | 27 | Female | Negative | Negative | No | No | No | 2nd dose     | Covid-19 (Moderna)   | Covid-19 (Moderna)   | 19/7/2021 | 70  | Epilepsy             | Lamotrigin                                                           |
| C2.173 | 2 | 53 | Female | Negative | Negative | No | No | No | 2nd dose     | Comirnaty (Biontech) | Comirnaty (Biontech) | 26/6/2021 | 93  | None                 | None                                                                 |
| C2.174 | 2 | 19 | Female | Negative | Negative | No | No | No | 2nd dose     | Comirnaty (Biontech) | Comirnaty (Biontech) | 6/7/2021  | 83  | None                 | None                                                                 |
| C2.175 | 2 | 51 | Male   | Negative | Negative | No | No | No | 2nd dose     | Comirnaty (Biontech) | Comirnaty (Biontech) | 28/4/2021 | 152 | None                 | None                                                                 |
| C2.176 | 2 | 26 | Male   | Negative | Negative | No | No | No | 2nd dose     | Comirnaty (Biontech) | Comirnaty (Biontech) | 25/5/2021 | 125 | None                 | None                                                                 |
| C2.177 | 2 | 27 | Female | Negative | Negative | No | No | No | 2nd dose     | Comirnaty (Biontech) | Comirnaty (Biontech) | 29/1/2021 | 241 | None                 | None                                                                 |
| C2.178 | 2 | 34 | Male   | Negative | Negative | No | No | No | 2nd dose     | Comirnaty (Biontech) | Comirnaty (Biontech) | 1/7/2021  | 88  | None                 | None                                                                 |
| C2.179 | 2 | 31 | Male   | Negative | Negative | No | No | No | 2nd dose     | Comirnaty (Biontech) | Comirnaty (Biontech) | 12/6/2021 | 107 | None                 | None                                                                 |

|        |   |    |        |          |          |    |        |    |              |                          |                          |           |     |                                   |                                     |
|--------|---|----|--------|----------|----------|----|--------|----|--------------|--------------------------|--------------------------|-----------|-----|-----------------------------------|-------------------------------------|
| C2.180 | 2 | 28 | Female | Negative | Negative | No | No     | No | 2nd dose     | Comirnaty (Biontech)     | Comirnaty (Biontech)     | 15/7/2021 | 74  | None                              | None                                |
| C2.181 | 2 | 28 | Female | Negative | Negative | No | No     | No | 2nd dose     | Comirnaty (Biontech)     | Comirnaty (Biontech)     | 17/6/2021 | 102 | None                              | None                                |
| C2.182 | 2 | 49 | Male   | Negative | Negative | No | No     | No | 2nd dose     | Comirnaty (Biontech)     | Comirnaty (Biontech)     | 23/6/2021 | 96  | Primary sclerosing cholangitis    | Ursodesoxcholic acid                |
| C2.183 | 2 | 58 | Male   | Negative | Negative | No | No     | No | 2nd dose     | Comirnaty (Biontech)     | Comirnaty (Biontech)     | 10/6/2021 | 109 | None                              | None                                |
| C2.184 | 2 | 50 | Female | Negative | Negative | No | No     | No | 2nd dose     | Comirnaty (Biontech)     | Comirnaty (Biontech)     | 2/2/2021  | 237 | Thyroid disorder                  | L-thyroxine                         |
| C2.185 | 2 | 27 | Female | Negative | Negative | No | No     | No | 2nd dose     | Comirnaty (Biontech)     | Comirnaty (Biontech)     | 16/8/2021 | 42  | None                              | None                                |
| C2.186 | 2 | 54 | Male   | Negative | Negative | No | Unsure | No | 1st dose     | Johnson & Johnson        |                          | 27/8/2021 | 31  | None                              | None                                |
| C2.187 | 2 | 44 | Female | Negative | Negative | No | No     | No | 2nd dose     | Comirnaty (Biontech)     | Comirnaty (Biontech)     | 20/5/2021 | 130 | None                              | None                                |
| C2.188 | 2 | 50 | Female | Negative | Negative | No | Yes    | No | 1st dose     | Johnson & Johnson        |                          | 4/6/2021  | 115 | Hypertension, allergy, depression | Citalopram, cetirizine, candesartan |
| C2.189 | 2 | 37 | Female | Negative | Negative | No | No     | No | 2nd dose     | Covid-19 (Moderna)       | Covid-19 (Moderna)       | 29/6/2021 | 90  | None                              | None                                |
| C2.190 | 2 | 25 | Female | Negative | Negative | No | No     | No | 2nd dose     | Comirnaty (Biontech)     | Comirnaty (Biontech)     | 11/8/2021 | 47  | None                              | None                                |
| C2.191 | 2 | 44 | Female | Negative | Negative | No | No     | No | 2nd dose     | Vaxzevria (Astra-Zeneca) | Comirnaty (Biontech)     | 1/6/2021  | 118 | None                              | None                                |
| C2.192 | 2 | 24 | Female | Negative | Negative | No | No     | No | Unvaccinated |                          |                          |           |     | None                              | None                                |
| C2.193 | 2 | 25 | Female | Negative | Negative | No | No     | No | 2nd dose     | Covid-19 (Moderna)       | Covid-19 (Moderna)       | 27/7/2021 | 62  | None                              | None                                |
| C2.194 | 2 | 27 | Female | Negative | Negative | No | No     | No | 2nd dose     | Covid-19 (Moderna)       | Covid-19 (Moderna)       | 29/5/2021 | 121 | None                              | None                                |
| C2.195 | 2 | 41 | Female | Negative | Negative | No | No     | No | 2nd dose     | Comirnaty (Biontech)     | Comirnaty (Biontech)     | 25/6/2021 | 94  | None                              | None                                |
| C2.196 | 2 | 41 | Female | Negative | Negative | No | No     | No | 2nd dose     | Vaxzevria (Astra-Zeneca) | Vaxzevria (Astra-Zeneca) | 25/5/2021 | 125 | None                              | None                                |
| C2.197 | 2 | 42 | Male   | Negative | Negative | No | No     | No | 2nd dose     | Comirnaty (Biontech)     | Comirnaty (Biontech)     | 28/7/2021 | 61  | None                              | None                                |
| C2.198 | 2 | 27 | Female | Negative | Negative | No | No     | No | 2nd dose     | Comirnaty (Biontech)     | Comirnaty (Biontech)     | 11/6/2021 | 108 | None                              | None                                |
| C2.199 | 2 | 38 | Female | Negative | Negative | No | No     | No | 2nd dose     | Comirnaty (Biontech)     | Comirnaty (Biontech)     | 11/8/2021 | 47  | Thyroid disorder                  | L-thyroxine                         |
| C2.200 | 2 | 39 | Female | Negative | Negative | No | No     | No | 2nd dose     | Comirnaty (Biontech)     | Comirnaty (Biontech)     | 25/6/2021 | 94  | None                              | None                                |



|        |   |    |        |          |          |    |     |    |          |                          |                          |           |     |                               |                          |
|--------|---|----|--------|----------|----------|----|-----|----|----------|--------------------------|--------------------------|-----------|-----|-------------------------------|--------------------------|
| C2.201 | 2 | 45 | Female | Negative | Negative | No | No  | No | 2nd dose | Comirnaty (Biontech)     | Comirnaty (Biontech)     | 23/6/2021 | 96  | None                          | None                     |
| C2.202 | 2 | 47 | Female | Negative | Negative | No | No  | No | 2nd dose | Comirnaty (Biontech)     | Vaxzevria (Astra-Zeneca) | 19/5/2021 | 131 | None                          | None                     |
| C2.203 | 2 | 45 | Male   | Negative | Negative | No | No  | No | 2nd dose | Comirnaty (Biontech)     | Comirnaty (Biontech)     | 16/6/2021 | 103 | None                          | None                     |
| C2.204 | 2 | 33 | Male   | Negative | Negative | No | No  | No | 2nd dose | Comirnaty (Biontech)     | Comirnaty (Biontech)     | 16/8/2021 | 42  | None                          | None                     |
| C2.205 | 2 | 63 | Female | Negative | Negative | No | No  | No | 2nd dose | Comirnaty (Biontech)     | Comirnaty (Biontech)     | 20/6/2021 | 99  | Hypertension, thyroid removal | Candesartan, L-thyroxine |
| C2.206 | 2 | 49 | Female | Negative | Negative | No | No  | No | 2nd dose | Comirnaty (Biontech)     | Comirnaty (Biontech)     | 14/7/2021 | 75  | None                          | None                     |
| C2.207 | 2 | 62 | Female | Negative | Negative | No | Yes | No | 1st dose | Comirnaty (Biontech)     |                          | 19/5/2021 | 131 | None                          | None                     |
| C2.208 | 2 | 31 | Female | Negative | Negative | No | No  | No | 2nd dose | Covid-19 (Moderna)       | Covid-19 (Moderna)       | 27/7/2021 | 62  | None                          | None                     |
| C2.209 | 2 | 31 | Male   | Negative | Negative | No | No  | No | 2nd dose | Comirnaty (Biontech)     | Comirnaty (Biontech)     | 15/7/2021 | 74  | None                          | None                     |
| C2.210 | 2 | 36 | Female | Negative | Negative | No | Yes | No | 1st dose | Comirnaty (Biontech)     |                          | 1/7/2021  | 88  | None                          | None                     |
| C2.211 | 2 | 40 | Female | Negative | Negative | No | No  | No | 2nd dose | Comirnaty (Biontech)     | Comirnaty (Biontech)     | 17/6/2021 | 102 | None                          | None                     |
| C2.212 | 2 | 26 | Female | Negative | Negative | No | No  | No | 2nd dose | Comirnaty (Biontech)     | Comirnaty (Biontech)     | 21/5/2021 | 129 | Hashimoto                     | L-thyroxine              |
| C2.213 | 2 | 44 | Female | Negative | Negative | No | No  | No | 2nd dose | Vaxzevria (Astra-Zeneca) | Comirnaty (Biontech)     | 29/5/2021 | 121 | None                          | None                     |
| C2.214 | 2 | 25 | Female | Negative | Negative | No | No  | No | 2nd dose | Comirnaty (Biontech)     | Comirnaty (Biontech)     | 7/7/2021  | 82  | Mental disorder               | Mirtazapine              |
| C2.215 | 2 | 26 | Female | Negative | Negative | No | No  | No | 2nd dose | Comirnaty (Biontech)     | Comirnaty (Biontech)     | 19/7/2021 | 70  | None                          | None                     |
| C2.216 | 2 | 35 | Male   | Negative | Negative | No | No  | No | 2nd dose | Comirnaty (Biontech)     | Comirnaty (Biontech)     | 17/6/2021 | 102 | None                          | None                     |
| C2.217 | 2 | 53 | Male   | Negative | Negative | No | No  | No | 2nd dose | Comirnaty (Biontech)     | Comirnaty (Biontech)     | 18/6/2021 | 101 | None                          | None                     |
| C2.218 | 2 | 31 | Male   | Negative | Negative | No | No  | No | 2nd dose | Comirnaty (Biontech)     | Comirnaty (Biontech)     | 15/6/2021 | 104 | None                          | None                     |
| C2.219 | 2 | 41 | Male   | Negative | Negative | No | No  | No | 2nd dose | Covid-19 (Moderna)       | Covid-19 (Moderna)       | 23/8/2021 | 35  | None                          | None                     |
| C2.220 | 2 | 51 | Female | Negative | Negative | No | No  | No | 2nd dose | Comirnaty (Biontech)     | Comirnaty (Biontech)     | 15/6/2021 | 104 | None                          | None                     |
| C2.221 | 2 | 54 | Male   | Negative | Negative | No | No  | No | 2nd dose | Comirnaty (Biontech)     | Comirnaty (Biontech)     | 15/6/2021 | 104 | Thyroid disorder              | L-thyroxine              |

|        |   |     |        |          |          |    |    |    |              |                          |                          |           |     |                                 |                           |
|--------|---|-----|--------|----------|----------|----|----|----|--------------|--------------------------|--------------------------|-----------|-----|---------------------------------|---------------------------|
| C2.222 | 2 | 28  | Female | Negative | Negative | No | No | No | 2nd dose     | Comirnaty (Biontech)     | Comirnaty (Biontech)     | 7/7/2021  | 82  | None                            | None                      |
| C2.223 | 2 | 51  | Male   | Negative | Negative | No | No | No | 2nd dose     | Vaxzevria (Astra-Zeneca) | Comirnaty (Biontech)     | 12/7/2021 | 77  | None                            | None                      |
| C2.224 | 2 | 47  | Female | Negative | Negative | No | No | No | 2nd dose     | Comirnaty (Biontech)     | Comirnaty (Biontech)     | 9/6/2021  | 110 | Hashimoto, rheumatoid arthritis | L-thyroxine, methotrexate |
| C2.225 | 2 | 49  | Male   | Negative | Negative | No | No | No | 2nd dose     | Comirnaty (Biontech)     | Comirnaty (Biontech)     | 22/7/2021 | 67  | None                            | None                      |
| C2.226 | 2 | 44  | Female | Negative | Negative | No | No | No | 2nd dose     | Covid-19 (Moderna)       | Covid-19 (Moderna)       | 23/8/2021 | 35  | Thyroid disorder                | L-thyroxine               |
| C2.227 | 2 | 46  | Female | Negative | Negative | No | No | No | 2nd dose     | Covid-19 (Moderna)       | Covid-19 (Moderna)       | 19/7/2021 | 70  | None                            | None                      |
| C2.228 | 2 | 45  | Female | Negative | Negative | No | No | No | 2nd dose     | Comirnaty (Biontech)     | Comirnaty (Biontech)     | 17/5/2021 | 133 | None                            | None                      |
| C2.229 | 2 | 41  | Male   | Negative | Negative | No | No | No | 2nd dose     | Vaxzevria (Astra-Zeneca) | Comirnaty (Biontech)     | 13/8/2021 | 45  | None                            | None                      |
| C2.230 | 2 | 48  | Female | Negative | Negative | No | No | No | 2nd dose     | Vaxzevria (Astra-Zeneca) | Vaxzevria (Astra-Zeneca) | 8/6/2021  | 111 | None                            | None                      |
| C2.231 | 2 | N/A | Female | Negative | Negative | No | No | No | 2nd dose     | Comirnaty (Biontech)     | Comirnaty (Biontech)     | 17/6/2021 | 102 | Thyroid disorder                | L-thyroxine               |
| C2.232 | 2 | 42  | Female | Negative | Negative | No | No | No | 2nd dose     | Comirnaty (Biontech)     | Comirnaty (Biontech)     | 17/6/2021 | 102 | None                            | None                      |
| C2.233 | 2 | 22  | Female | Negative | Negative | No | No | No | 2nd dose     | Vaxzevria (Astra-Zeneca) | Comirnaty (Biontech)     | N/A       | N/A | None                            | None                      |
| C2.234 | 2 | 27  | Female | Negative | Negative | No | No | No | Unvaccinated |                          |                          |           |     | None                            | None                      |
| C2.235 | 2 | 44  | Female | Negative | Negative | No | No | No | 2nd dose     | Covid-19 (Moderna)       | Covid-19 (Moderna)       | 26/3/2021 | 185 | Thyroid disorder                | L-thyroxine               |
| C2.236 | 2 | 51  | Female | Negative | Negative | No | No | No | 2nd dose     | Comirnaty (Biontech)     | Comirnaty (Biontech)     | 27/7/2021 | 62  | None                            | None                      |
| C2.237 | 2 | 41  | Female | Negative | Negative | No | No | No | 2nd dose     | Vaxzevria (Astra-Zeneca) | Covid-19 (Moderna)       | 20/6/2021 | 99  | None                            | None                      |
| C2.238 | 2 | 32  | Male   | Negative | Negative | No | No | No | 2nd dose     | Comirnaty (Biontech)     | Comirnaty (Biontech)     | 15/6/2021 | 104 | Thyroid disorder                | L-thyroxine               |
| C2.239 | 2 | 31  | Female | Negative | Negative | No | No | No | 2nd dose     | Comirnaty (Biontech)     | Comirnaty (Biontech)     | 1/7/2021  | 88  | Thyroid disorder                | L-thyroxine               |
| C2.240 | 2 | 35  | Female | Negative | Negative | No | No | No | 2nd dose     | Comirnaty (Biontech)     | Comirnaty (Biontech)     | 1/7/2021  | 88  | None                            | None                      |
| C2.241 | 2 | 33  | Male   | Negative | Negative | No | No | No | 2nd dose     | Comirnaty (Biontech)     | Comirnaty (Biontech)     | 16/6/2021 | 103 | None                            | None                      |

|        |   |    |        |          |          |    |        |    |          |                          |                      |           |     |                                   |                               |
|--------|---|----|--------|----------|----------|----|--------|----|----------|--------------------------|----------------------|-----------|-----|-----------------------------------|-------------------------------|
| C2.242 | 2 | 20 | Female | Negative | Negative | No | No     | No | 2nd dose | Comirnaty (Biontech)     | Comirnaty (Biontech) | 20/5/2021 | 130 | None                              | None                          |
| C2.243 | 2 | 21 | Female | Negative | Negative | No | No     | No | 2nd dose | Comirnaty (Biontech)     | Comirnaty (Biontech) | N/A       | N/A | None                              | None                          |
| C2.244 | 2 | 52 | Female | Negative | Negative | No | No     | No | 2nd dose | Comirnaty (Biontech)     | Comirnaty (Biontech) | 20/7/2021 | 69  | Hypertension, thyroid disorder    | L-thyroxine, candesartan      |
| C2.245 | 2 | 29 | Female | Negative | Negative | No | No     | No | 2nd dose | Covid-19 (Moderna)       | Covid-19 (Moderna)   | 1/5/2021  | 149 | None                              | None                          |
| C2.246 | 2 | 27 | Female | Negative | Negative | No | No     | No | 2nd dose | Comirnaty (Biontech)     | Comirnaty (Biontech) | 20/6/2021 | 99  | None                              | None                          |
| C2.247 | 2 | 25 | Female | Negative | Negative | No | No     | No | 2nd dose | Comirnaty (Biontech)     | Comirnaty (Biontech) | 9/7/2021  | 80  | None                              | None                          |
| C2.248 | 2 | 30 | Female | Negative | Negative | No | Unsure | No | 2nd dose | Covid-19 (Moderna)       | Covid-19 (Moderna)   | 28/7/2021 | 61  | Rheumatic disease                 | Methotrexate                  |
| C2.249 | 2 | 31 | Male   | Negative | Negative | No | Unsure | No | 2nd dose | Comirnaty (Biontech)     | Comirnaty (Biontech) | 8/9/2021  | 19  | None                              | None                          |
| C2.250 | 2 | 40 | Female | Negative | Negative | No | Unsure | No | 1st dose | Johnson & Johnson        |                      | 3/9/2021  | 24  | None                              | None                          |
| C2.251 | 2 | 52 | Female | Negative | Negative | No | No     | No | 2nd dose | Comirnaty (Biontech)     | Comirnaty (Biontech) | 2/6/2021  | 117 | Asthma, pollen allergy            | None                          |
| C2.252 | 2 | 49 | Female | Negative | Negative | No | No     | No | 2nd dose | Comirnaty (Biontech)     | Comirnaty (Biontech) | 26/5/2021 | 124 | Hypertension                      | Valsartan                     |
| C2.253 | 2 | 45 | Female | Negative | Negative | No | No     | No | 2nd dose | Comirnaty (Biontech)     | Comirnaty (Biontech) | 18/5/2021 | 132 | None                              | None                          |
| C2.254 | 2 | 53 | Male   | Negative | Negative | No | No     | No | 2nd dose | Comirnaty (Biontech)     | Comirnaty (Biontech) | 30/6/2021 | 89  | None                              | None                          |
| C2.255 | 2 | 39 | Female | Negative | Negative | No | No     | No | 2nd dose | Covid-19 (Moderna)       | Covid-19 (Moderna)   | 28/7/2021 | 61  | Thyroid disorder, mental disorder | L-thyroxine, Tianeptin        |
| C2.256 | 2 | 28 | Male   | Negative | Negative | No | No     | No | 2nd dose | Comirnaty (Biontech)     | Comirnaty (Biontech) | 21/7/2021 | 68  | None                              | None                          |
| C2.257 | 2 | 40 | Female | Negative | Negative | No | No     | No | 1st dose | Johnson & Johnson        |                      | 11/6/2021 | 108 | Thyroid disorder                  | L-thyroxine, potassium iodide |
| C2.258 | 2 | 21 | Female | Negative | Negative | No | Unsure | No | 2nd dose | Comirnaty (Biontech)     | Comirnaty (Biontech) | 5/6/2021  | 114 | None                              | None                          |
| C2.259 | 2 | 42 | Male   | Negative | Negative | No | No     | No | 2nd dose | Vaxzevria (Astra-Zeneca) | Comirnaty (Biontech) | 14/7/2021 | 75  | None                              | None                          |
| C2.260 | 2 | 22 | Female | Negative | Negative | No | No     | No | 2nd dose | Covid-19 (Moderna)       | Covid-19 (Moderna)   | 7/6/2021  | 112 | None                              | None                          |
| C2.261 | 2 | 24 | Male   | Negative | Negative | No | No     | No | 2nd dose | Comirnaty (Biontech)     | Comirnaty (Biontech) | 6/6/2021  | 113 | None                              | None                          |
| C2.262 | 2 | 43 | Female | Negative | Negative | No | No     | No | 1st dose | Covid-19 (Moderna)       |                      | 28/5/2021 | 122 | None                              | None                          |
| C2.263 | 2 | 44 | Female | Negative | Negative | No | No     | No | 2nd dose | Comirnaty (Biontech)     | Comirnaty (Biontech) | 22/6/2021 | 97  | None                              | None                          |

|        |   |    |        |          |          |    |     |    |              |                      |                          |           |     |                         |      |                           |
|--------|---|----|--------|----------|----------|----|-----|----|--------------|----------------------|--------------------------|-----------|-----|-------------------------|------|---------------------------|
| C2.264 | 2 | 46 | Male   | Negative | Negative | No | No  | No | 2nd dose     |                      |                          |           |     |                         | None | None                      |
| C2.265 | 2 | 42 | Female | Negative | Negative | No | No  | No | Unvaccinated |                      |                          |           |     |                         | None | None                      |
| C2.266 | 2 | 48 | Female | Negative | Negative | No | No  | No | 2nd dose     |                      | Comirnaty (Biontech)     | 20/6/2021 | 99  |                         | None | None                      |
| C2.267 | 2 | 26 | Male   | Negative | Negative | No | No  | No | 2nd dose     |                      | Covid-19 (Moderna)       | 16/6/2021 | 103 |                         | None | None                      |
| C2.268 | 2 | 35 | Male   | Negative | Negative | No | No  | No | 2nd dose     |                      | Comirnaty (Biontech)     | 29/7/2021 | 60  | Hypertension            |      | Ramipril                  |
| C2.269 | 2 | 43 | Female | Negative | Negative | No | No  | No | 2nd dose     |                      | Comirnaty (Biontech)     | N/A       | N/A | Bronchial asthma        |      | Formoterol+beclomethasone |
| C2.270 | 2 | 46 | Male   | Negative | Negative | No | No  | No | 2nd dose     |                      | Vaxzevria (Astra-Zeneca) | 26/5/2021 | 124 |                         | None | None                      |
| C2.271 | 2 | 27 | Female | Negative | Negative | No | No  | No | 2nd dose     |                      | Comirnaty (Biontech)     | 14/6/2021 | 105 |                         | None | None                      |
| C2.272 | 2 | 42 | Female | Negative | Negative | No | No  | No | 2nd dose     |                      | Comirnaty (Biontech)     | 18/5/2021 | 132 |                         | None | None                      |
| C2.273 | 2 | 46 | Female | Negative | Negative | No | No  | No | 2nd dose     |                      | Vaxzevria (Astra-Zeneca) | 13/5/2021 | 137 |                         | None | None                      |
| C2.274 | 2 | 52 | Male   | Negative | Negative | No | Yes | No | 2nd dose     |                      | Comirnaty (Biontech)     | 23/6/2021 | 96  |                         | None | None                      |
| C2.275 | 2 | 56 | Female | Negative | Negative | No | No  | No | 2nd dose     |                      | Comirnaty (Biontech)     | 9/6/2021  | 110 |                         | None | None                      |
| C2.276 | 2 | 34 | Female | Negative | Negative | No | No  | No | 2nd dose     |                      | Comirnaty (Biontech)     | 1/3/2021  | 210 |                         | None | None                      |
| C2.277 | 2 | 58 | Female | Negative | Negative | No | No  | No | 2nd dose     |                      | Comirnaty (Biontech)     | 24/7/2021 | 65  |                         | None | None                      |
| C2.278 | 2 | 48 | Female | Negative | Negative | No | No  | No | Unvaccinated |                      |                          |           |     |                         | None | None                      |
| C2.279 | 2 | 49 | Female | Negative | Negative | No | No  | No | 2nd dose     |                      | Comirnaty (Biontech)     | 8/7/2021  | 81  |                         | None | None                      |
| C2.280 | 2 | 36 | Female | Negative | Negative | No | No  | No | 2nd dose     |                      | Covid-19 (Moderna)       | 5/5/2021  | 145 |                         | None | None                      |
| C2.281 | 2 | 48 | Female | Negative | Negative | No | No  | No | 2nd dose     |                      | Comirnaty (Biontech)     | 23/7/2021 | 66  | Cardiovascular disorder |      | Phenprocoumon             |
| C2.282 | 2 | 54 | Male   | Negative | Negative | No | No  | No | 2nd dose     |                      | Comirnaty (Biontech)     | 10/9/2021 | 17  |                         | None | None                      |
| C2.283 | 2 | 46 | Male   | Negative | Negative | No | Yes | No | 1st dose     | Comirnaty (Biontech) |                          | 13/8/2021 | 45  |                         | None | None                      |
| C2.284 | 2 | 40 | Female | Negative | Negative | No | No  | No | 2nd dose     |                      | Comirnaty (Biontech)     | 24/6/2021 | 95  | Hashimoto               |      | L-thyroxine               |
| C2.285 | 2 | 31 | Female | Negative | Negative | No | No  | No | 2nd dose     |                      | Comirnaty (Biontech)     | 22/6/2021 | 97  |                         | None | None                      |
| C2.286 | 2 | 56 | Female | Negative | Negative | No | No  | No | Unvaccinated |                      |                          |           |     |                         | None | None                      |

|        |   |    |        |          |          |    |    |    |          |                      |                      |           |     |                                                   |                                                  |
|--------|---|----|--------|----------|----------|----|----|----|----------|----------------------|----------------------|-----------|-----|---------------------------------------------------|--------------------------------------------------|
| C2.287 | 2 | 51 | Female | Negative | Negative | No | No | No | 2nd dose | Comirnaty (Biontech) | Comirnaty (Biontech) | 29/4/2021 | 151 | Breast cancer                                     | Trastuzumab                                      |
| C2.288 | 2 | 28 | Male   | Negative | Negative | No | No | No | 2nd dose |                      | Covid-19 (Moderna)   | 19/7/2021 | 70  | None                                              | None                                             |
| C2.289 | 2 | 28 | Female | Negative | Negative | No | No | No | 2nd dose |                      | Comirnaty (Biontech) | 14/6/2021 | 105 | Rheumatoid arthritis, Hashimoto, bronchial asthma | Etanercept, methotrexate, cortisone, l-thyroxine |
| C2.290 | 2 | 29 | Female | Negative | Negative | No | No | No | 2nd dose |                      | Comirnaty (Biontech) | 30/5/2021 | 120 | None                                              | None                                             |
| C2.291 | 2 | 37 | Female | Negative | Negative | No | No | No | 2nd dose |                      | Comirnaty (Biontech) | 30/5/2021 | 120 | None                                              | None                                             |
| C2.292 | 2 | 43 | Female | Negative | Negative | No | No | No | 2nd dose |                      | Comirnaty (Biontech) | 26/6/2021 | 93  | None                                              | None                                             |
| C2.293 | 2 | 20 | Male   | Negative | Negative | No | No | No | 2nd dose |                      | Covid-19 (Moderna)   | 12/5/2021 | 138 | None                                              | None                                             |
| C2.294 | 2 | 43 | Male   | Negative | Negative | No | No | No | 2nd dose |                      | Comirnaty (Biontech) | 25/6/2021 | 94  | None                                              | None                                             |
| C2.295 | 2 | 24 | Male   | Negative | Negative | No | No | No | 2nd dose |                      | Comirnaty (Biontech) | 11/8/2021 | 47  | None                                              | None                                             |
| C2.296 | 2 | 51 | Male   | Negative | Negative | No | No | No | 2nd dose |                      | Comirnaty (Biontech) | 10/6/2021 | 109 | Bronchial asthma                                  | Formoterol+budesonide, salbutamol                |
| C2.297 | 2 | 41 | Male   | Negative | Negative | No | No | No | 2nd dose |                      | Comirnaty (Biontech) | 22/6/2021 | 97  | None                                              | None                                             |
| C2.298 | 2 | 42 | Female | Negative | Negative | No | No | No | 2nd dose |                      | Comirnaty (Biontech) | 21/7/2021 | 68  | None                                              | None                                             |
| C2.299 | 2 | 30 | Female | Negative | Negative | No | No | No | 2nd dose |                      | Covid-19 (Moderna)   | 16/7/2021 | 73  | Hypertension, asthma                              | None                                             |
| C2.300 | 2 | 53 | Female | Negative | Negative | No | No | No | 2nd dose |                      | Comirnaty (Biontech) | 5/8/2021  | 53  | None                                              | None                                             |
| C2.301 | 2 | 25 | Female | Negative | Negative | No | No | No | 2nd dose |                      | Comirnaty (Biontech) | 16/7/2021 | 73  | None                                              | None                                             |
| C2.302 | 2 | 29 | Male   | Negative | Negative | No | No | No | 2nd dose |                      | Comirnaty (Biontech) | 28/7/2021 | 61  | None                                              | None                                             |
| C2.303 | 2 | 34 | Male   | Negative | Negative | No | No | No | 2nd dose |                      | Comirnaty (Biontech) | 29/6/2021 | 90  | Hypertension                                      | None                                             |
| C2.304 | 2 | 24 | Female | Negative | Negative | No | No | No | 2nd dose |                      | Covid-19 (Moderna)   | 6/5/2021  | 144 | None                                              | None                                             |
| C2.305 | 2 | 53 | Male   | Negative | Negative | No | No | No | 2nd dose |                      | Johnson & Johnson    | 10/9/2021 | 17  | None                                              | None                                             |
| C2.306 | 2 | 55 | Female | Negative | Negative | No | No | No | 2nd dose |                      | Comirnaty (Biontech) | 22/5/2021 | 128 | None                                              | None                                             |
| C2.307 | 2 | 25 | Female | Negative | Negative | No | No | No | 2nd dose |                      | Comirnaty (Biontech) | 22/7/2021 | 67  | None                                              | None                                             |

|        |   |    |        |          |          |    |    |    |          |                      |                          |           |     |                  |               |
|--------|---|----|--------|----------|----------|----|----|----|----------|----------------------|--------------------------|-----------|-----|------------------|---------------|
| C2.308 | 2 | 44 | Male   | Negative | Negative | No | No | No | 2nd dose |                      | Comirnaty (Biontech)     | 11/6/2021 | 108 | None             | None          |
| C2.309 | 2 | 24 | Female | Negative | Negative | No | No | No | 2nd dose |                      | Johnson & Johnson        | 27/5/2021 | 123 | None             | None          |
| C2.310 | 2 | 31 | Male   | Negative | Negative | No | No | No | 2nd dose |                      | Comirnaty (Biontech)     | 2/8/2021  | 56  | None             | None          |
| C2.311 | 2 | 24 | Female | Negative | Negative | No | No | No | 2nd dose |                      | Comirnaty (Biontech)     | 6/7/2021  | 83  | None             | None          |
| C2.312 | 2 | 47 | Male   | Negative | Negative | No | No | No | 2nd dose |                      | Comirnaty (Biontech)     | 6/7/2021  | 83  | None             | None          |
| C2.313 | 2 | 36 | Male   | Negative | Negative | No | No | No | 2nd dose |                      | Comirnaty (Biontech)     | 5/2/2021  | 234 | None             | None          |
| C2.314 | 2 | 30 | Female | Negative | Negative | No | No | No | 2nd dose |                      | Comirnaty (Biontech)     | 14/6/2021 | 105 | None             | None          |
| C2.315 | 2 | 69 | Female | Negative | Negative | No | No | No | 2nd dose |                      | Comirnaty (Biontech)     | 28/5/2021 | 122 | Thyroid disorder | L - thyroxine |
| C2.316 | 2 | 36 | Female | Negative | Negative | No | No | No | 2nd dose |                      | Comirnaty (Biontech)     | 3/8/2021  | 55  | None             | None          |
| C2.317 | 2 | 58 | Female | Negative | Negative | No | No | No | 2nd dose |                      | Comirnaty (Biontech)     | 19/6/2021 | 100 | Asthma           | None          |
| C2.318 | 2 | 26 | Male   | Negative | Negative | No | No | No | 2nd dose |                      | Vaxzevria (Astra-Zeneca) | 2/6/2021  | 117 | None             | None          |
| C2.319 | 2 | 36 | Female | Negative | Negative | No | No | No | 2nd dose |                      | Covid-19 (Moderna)       | 30/4/2021 | 150 | None             | None          |
| C2.320 | 2 | 37 | Female | Negative | Negative | No | No | No | 2nd dose |                      | Covid-19 (Moderna)       | 1/5/2021  | 149 | None             | None          |
| C2.321 | 2 | 44 | Female | Negative | Negative | No | No | No | 2nd dose |                      | Comirnaty (Biontech)     | 19/5/2021 | 131 | None             | None          |
| C2.322 | 2 | 28 | Female | Negative | Negative | No | No | No | 2nd dose |                      | Comirnaty (Biontech)     | 16/6/2021 | 103 | None             | None          |
| C2.323 | 2 | 33 | Female | Negative | Negative | No | No | No | 2nd dose |                      | Comirnaty (Biontech)     | 22/7/2021 | 67  | None             | None          |
| C2.324 | 2 | 46 | Female | Negative | Negative | No | No | No | 2nd dose | Comirnaty (Biontech) | Comirnaty (Biontech)     | 27/5/2021 | 123 | None             | None          |
| C2.325 | 2 | 44 | Female | Negative | Negative | No | No | No | 2nd dose |                      | Comirnaty (Biontech)     | 24/6/2021 | 95  | Hypertension     | Ramipril      |
| C2.326 | 2 | 48 | Female | Negative | Negative | No | No | No | 2nd dose |                      | Comirnaty (Biontech)     | 7/7/2021  | 82  | None             | None          |
| C2.327 | 2 | 40 | Female | Negative | Negative | No | No | No | 2nd dose |                      | Comirnaty (Biontech)     | 31/7/2021 | 58  | None             | None          |
| C2.328 | 2 | 23 | Female | Negative | Negative | No | No | No | 2nd dose |                      | Comirnaty (Biontech)     | 14/7/2021 | 75  | None             | None          |
| C2.329 | 2 | 34 | Female | Negative | Negative | No | No | No | 2nd dose |                      | Covid-19 (Moderna)       | 1/5/2021  | 149 | None             | None          |

|        |   |    |        |          |          |    |        |    |              |                      |                      |           |     |                                                                          |                                 |
|--------|---|----|--------|----------|----------|----|--------|----|--------------|----------------------|----------------------|-----------|-----|--------------------------------------------------------------------------|---------------------------------|
| C2.330 | 2 | 32 | Female | Negative | Negative | No | No     | No | 2nd dose     |                      | Comirnaty (Biontech) | 19/6/2021 | 100 | None                                                                     | None                            |
| C2.331 | 2 | 51 | Male   | Negative | Negative | No | No     | No | 2nd dose     |                      | Comirnaty (Biontech) | 21/7/2021 | 68  | None                                                                     | None                            |
| C2.332 | 2 | 27 | Male   | Negative | Negative | No | No     | No | 2nd dose     |                      | Comirnaty (Biontech) | 2/6/2021  | 117 | Hypothyroidism, fungal infection                                         | L-thyroxine, fluconazol         |
| C2.333 | 2 | 25 | Female | Negative | Negative | No | No     | No | 2nd dose     |                      | Comirnaty (Biontech) | 10/5/2021 | 140 | Hypertension                                                             | Amlodipine, candesartan         |
| C2.334 | 2 | 44 | Male   | Negative | Negative | No | No     | No | 2nd dose     |                      | Comirnaty (Biontech) | 9/7/2021  | 80  | None                                                                     | None                            |
| C2.335 | 2 | 54 | Female | Negative | Negative | No | No     | No | 2nd dose     |                      | Comirnaty (Biontech) | 8/6/2021  | 111 | None                                                                     | None                            |
| C2.336 | 2 | 38 | Female | Negative | Negative | No | No     | No | 2nd dose     |                      | Comirnaty (Biontech) | 21/5/2021 | 129 | None                                                                     | None                            |
| C2.337 | 2 | 46 | Female | Negative | Negative | No | No     | No | 2nd dose     |                      | Comirnaty (Biontech) | 29/4/2021 | 151 | None                                                                     | None                            |
| C2.338 | 2 | 25 | Male   | Negative | Negative | No | No     | No | 2nd dose     |                      | Comirnaty (Biontech) | 14/7/2021 | 75  | None                                                                     | None                            |
| C2.339 | 2 | 38 | Female | Negative | Negative | No | No     | No | 2nd dose     |                      | Comirnaty (Biontech) | 9/6/2021  | 110 | None                                                                     | None                            |
| C2.340 | 2 | 55 | Male   | Negative | Negative | No | No     | No | 2nd dose     |                      | Comirnaty (Biontech) | 8/6/2021  | 111 | None                                                                     | None                            |
| C2.341 | 2 | 43 | Female | Negative | Negative | No | No     | No | 2nd dose     |                      | Comirnaty (Biontech) | 18/6/2021 | 101 | Diabetes type 2, mental disorder                                         | Insulin, pregabalin, mirtazapin |
| C2.342 | 2 | 33 | Female | Negative | Negative | No | No     | No | 2nd dose     | Comirnaty (Biontech) | Comirnaty (Biontech) | 22/6/2021 | 97  | None                                                                     | None                            |
| C2.343 | 2 | 34 | Female | Negative | Negative | No | No     | No | 2nd dose     |                      | Comirnaty (Biontech) | 1/6/2021  | 118 | Renal insufficiency, hypertension, mental disorders, lupus anticoagulant | Venlafaxine, quetiapin          |
| C2.344 | 2 | 49 | Female | Negative | Negative | No | No     | No | 2nd dose     |                      | Comirnaty (Biontech) | 8/6/2021  | 111 | Diabetes type 1                                                          | Insulin                         |
| C2.345 | 2 | 39 | Female | Negative | Negative | No | Unsure | No | Unvaccinated |                      |                      |           |     | None                                                                     | None                            |
| C2.346 | 2 | 40 | Female | Negative | Negative | No | No     | No | 2nd dose     |                      | Comirnaty (Biontech) | 1/7/2021  | 88  | None                                                                     | None                            |
| C2.347 | 2 | 28 | Male   | Negative | Negative | No | No     | No | 2nd dose     |                      | Comirnaty (Biontech) | 30/7/2021 | 59  | None                                                                     | None                            |
| C2.348 | 2 | 27 | Female | Negative | Negative | No | No     | No | 2nd dose     |                      | Comirnaty (Biontech) | 7/7/2021  | 82  | None                                                                     | None                            |
| C2.349 | 2 | 39 | Female | Negative | Negative | No | No     | No | 2nd dose     |                      | Covid-19 (Moderna)   | 26/5/2021 | 124 | None                                                                     | None                            |
| C2.350 | 2 | 24 | Male   | Negative | Negative | No | No     | No | 2nd dose     |                      | Comirnaty (Biontech) | 8/6/2021  | 111 | None                                                                     | None                            |

|        |   |    |        |          |          |    |    |    |              |                      |                          |           |     |              |           |
|--------|---|----|--------|----------|----------|----|----|----|--------------|----------------------|--------------------------|-----------|-----|--------------|-----------|
| C2.351 | 2 | 43 | Female | Negative | Negative | No | No | No | Unvaccinated |                      |                          |           |     | None         | None      |
| C2.352 | 2 | 37 | Female | Negative | Negative | No | No | No | 2nd dose     |                      | Comirnaty (Biontech)     | 20/5/2021 | 130 | Asthma       | None      |
| C2.353 | 2 | 37 | Female | Negative | Negative | No | No | No | 2nd dose     |                      | Comirnaty (Biontech)     | 29/5/2021 | 121 | None         | None      |
| C2.354 | 2 | 29 | Female | Negative | Negative | No | No | No | 2nd dose     |                      | Vaxzevria (Astra-Zeneca) | 3/5/2021  | 147 | None         | None      |
| C2.355 | 2 | 37 | Female | Negative | Negative | No | No | No | 2nd dose     |                      | Comirnaty (Biontech)     | 26/2/2021 | 213 | None         | None      |
| C2.356 | 2 | 44 | Female | Negative | Negative | No | No | No | 2nd dose     |                      | Comirnaty (Biontech)     | 14/7/2021 | 75  | None         | None      |
| C2.357 | 2 | 34 | Female | Negative | Negative | No | No | No | 2nd dose     |                      | Comirnaty (Biontech)     | 20/7/2021 | 69  | None         | None      |
| C2.358 | 2 | 41 | Female | Negative | Negative | No | No | No | 2nd dose     |                      | Comirnaty (Biontech)     | 4/8/2021  | 54  | None         | None      |
| C2.359 | 2 | 36 | Female | Negative | Negative | No | No | No | 2nd dose     | Comirnaty (Biontech) | Comirnaty (Biontech)     | 20/7/2021 | 69  | None         | None      |
| C2.360 | 2 | 45 | Female | Negative | Negative | No | No | No | 2nd dose     |                      | Comirnaty (Biontech)     | 6/6/2021  | 113 | Diabetes     | Insulin   |
| C2.361 | 2 | 37 | Female | Negative | Negative | No | No | No | 2nd dose     |                      | Comirnaty (Biontech)     | 30/6/2021 | 89  | None         | None      |
| C2.362 | 2 | 43 | Male   | Negative | Negative | No | No | No | 2nd dose     |                      | Comirnaty (Biontech)     | 23/6/2021 | 96  | None         | None      |
| C2.363 | 2 | 58 | Female | Negative | Negative | No | No | No | 2nd dose     |                      | Covid-19 (Moderna)       | 25/7/2021 | 64  | None         | None      |
| C2.364 | 2 | 49 | Female | Negative | Negative | No | No | No | 2nd dose     |                      | Comirnaty (Biontech)     | 16/6/2021 | 103 | None         | None      |
| C2.365 | 2 | 34 | Male   | Negative | Negative | No | No | No | 2nd dose     |                      | Comirnaty (Biontech)     | 5/7/2021  | 84  | None         | None      |
| C2.366 | 2 | 28 | Female | Negative | Negative | No | No | No | 2nd dose     |                      | Comirnaty (Biontech)     | 13/5/2021 | 137 | None         | None      |
| C2.367 | 2 | 31 | Female | Negative | Negative | No | No | No | 2nd dose     |                      | Covid-19 (Moderna)       | 28/5/2021 | 122 | None         | None      |
| C2.368 | 2 | 22 | Female | Negative | Negative | No | No | No | 2nd dose     |                      | Covid-19 (Moderna)       | 17/6/2021 | 102 | None         | None      |
| C2.369 | 2 | 51 | Male   | Negative | Negative | No | No | No | 2nd dose     |                      | Comirnaty (Biontech)     | 15/6/2021 | 104 | Hypertension | Enalapril |
| C2.370 | 2 | 33 | Female | Negative | Negative | No | No | No | 2nd dose     |                      | Covid-19 (Moderna)       | 28/7/2021 | 61  | None         | None      |
| C2.371 | 2 | 56 | Female | Negative | Negative | No | No | No | 2nd dose     |                      | Comirnaty (Biontech)     | 8/5/2021  | 142 | None         | None      |
| C2.372 | 2 | 35 | Female | Negative | Negative | No | No | No | 2nd dose     | Comirnaty (Biontech) | Comirnaty (Biontech)     | 4/8/2021  | 54  | None         | None      |



|        |   |    |        |          |          |     |    |    |              |  |                          |           |     |                              |                          |
|--------|---|----|--------|----------|----------|-----|----|----|--------------|--|--------------------------|-----------|-----|------------------------------|--------------------------|
| C2.373 | 2 | 43 | Male   | Negative | Negative | No  | No | No | 2nd dose     |  | Comirnaty (Biontech)     | 12/6/2021 | 107 | Hypertension                 | Candesartan              |
| C2.374 | 2 | 26 | Female | Negative | Negative | No  | No | No | 2nd dose     |  | Covid-19 (Moderna)       | 27/7/2021 | 62  | None                         | None                     |
| C2.375 | 2 | 63 | Female | Negative | Negative | No  | No | No | 2nd dose     |  | Comirnaty (Biontech)     | 21/5/2021 | 129 | Hypertension, hypothyroidism | L-thyroxine, candesartan |
| C2.376 | 2 | 48 | Female | Negative | Negative | No  | No | No | 2nd dose     |  | Comirnaty (Biontech)     | 18/6/2021 | 101 | Hypertension                 | Ramipril                 |
| C2.377 | 2 | 40 | Female | Negative | Negative | No  | No | No | 2nd dose     |  | Comirnaty (Biontech)     | 30/4/2021 | 150 | Breast cancer                | Pertuzumab, Trastuzumab  |
| C2.378 | 2 | 64 | Female | Negative | Negative | No  | No | No | 2nd dose     |  | Covid-19 (Moderna)       | 22/7/2021 | 67  | Hypertension                 | Nebivolol                |
| C2.379 | 2 | 57 | Male   | Negative | Negative | yes | No | No | 2nd dose     |  | Comirnaty (Biontech)     | 3/8/2021  | 55  | None                         | None                     |
| C2.380 | 2 | 32 | Female | Negative | Negative | No  | No | No | 2nd dose     |  | Comirnaty (Biontech)     | 20/5/2021 | 130 | Crohn's disease              | Infliximab               |
| C2.381 | 2 | 47 | Male   | Negative | Negative | No  | No | No | 2nd dose     |  | Comirnaty (Biontech)     | 9/2/2021  | 230 | None                         | None                     |
| C2.382 | 2 | 34 | Female | Negative | Negative | No  | No | No | 2nd dose     |  | Comirnaty (Biontech)     | 10/6/2021 | 109 | None                         | None                     |
| C2.383 | 2 | 35 | Female | Negative | Negative | No  | No | No | 2nd dose     |  | Comirnaty (Biontech)     | 20/5/2021 | 130 | None                         | None                     |
| C2.384 | 2 | 55 | Male   | Negative | Negative | No  | No | No | 2nd dose     |  | Covid-19 (Moderna)       | 26/5/2021 | 124 | None                         | None                     |
| C2.385 | 2 | 34 | Female | Negative | Negative | No  | No | No | Unvaccinated |  |                          |           |     | None                         | None                     |
| C2.386 | 2 | 50 | Male   | Negative | Negative | No  | No | No | 2nd dose     |  | Covid-19 (Moderna)       | 19/7/2021 | 70  | None                         | None                     |
| C2.387 | 2 | 20 | Female | Negative | Negative | No  | No | No | 2nd dose     |  | Covid-19 (Moderna)       | 25/7/2021 | 64  | None                         | None                     |
| C2.388 | 2 | 62 | Female | Negative | Negative | No  | No | No | 2nd dose     |  | Comirnaty (Biontech)     | 22/6/2021 | 97  | None                         | None                     |
| C2.389 | 2 | 57 | Male   | Negative | Negative | No  | No | No | 2nd dose     |  | Comirnaty (Biontech)     | 18/6/2021 | 101 | None                         | None                     |
| C2.390 | 2 | 74 | Male   | Negative | Negative | No  | No | No | 2nd dose     |  | Vaxzevria (Astra-Zeneca) | 5/7/2021  | 84  | None                         | None                     |
| C2.391 | 2 | 49 | Female | Negative | Negative | No  | No | No | 2nd dose     |  | Comirnaty (Biontech)     | 16/6/2021 | 103 | None                         | None                     |
| C2.392 | 2 | 48 | Female | Negative | Negative | No  | No | No | 2nd dose     |  | Comirnaty (Biontech)     | 11/5/2021 | 139 | None                         | None                     |
| C2.393 | 2 | 43 | Female | Negative | Negative | No  | No | No | 2nd dose     |  | Covid-19 (Moderna)       | 30/8/2021 | 28  | None                         | None                     |
| C2.394 | 2 | 47 | Female | Negative | Negative | No  | No | No | 2nd dose     |  | Vaxzevria (Astra-Zeneca) | 28/6/2021 | 91  | Hypertension                 | Ramipril                 |

|        |   |    |        |          |          |    |     |    |          |                      |                      |           |     |                      |                                  |
|--------|---|----|--------|----------|----------|----|-----|----|----------|----------------------|----------------------|-----------|-----|----------------------|----------------------------------|
| C2.395 | 2 | 27 | Female | Negative | Negative | No | No  | No | 2nd dose |                      | Comirnaty (Biontech) | 17/6/2021 | 102 | None                 | None                             |
| C2.396 | 2 | 50 | Female | Negative | Negative | No | No  | No | 2nd dose |                      | Comirnaty (Biontech) | 20/6/2021 | 99  | None                 | None                             |
| C2.397 | 2 | 38 | Female | Negative | Negative | No | No  | No | 2nd dose |                      | Comirnaty (Biontech) | 18/6/2021 | 101 | None                 | None                             |
| C2.398 | 2 | 35 | Female | Negative | Negative | No | Yes | No | 2nd dose |                      | Comirnaty (Biontech) | 11/6/2021 | 108 | None                 | None                             |
| C2.399 | 2 | 31 | Female | Negative | Negative | No | No  | No | 2nd dose |                      | Comirnaty (Biontech) | 21/5/2021 | 129 | None                 | None                             |
| C2.400 | 2 | 39 | Female | Negative | Negative | No | No  | No | 2nd dose |                      | Comirnaty (Biontech) | 14/2/2021 | 225 | None                 | None                             |
| C2.401 | 2 | 41 | Female | Negative | Negative | No | No  | No | 2nd dose |                      | Comirnaty (Biontech) | 10/6/2021 | 109 | Asthma, hypertension | Salmeterol+fluticasone, ramipril |
| C2.402 | 2 | 45 | Female | Negative | Negative | No | No  | No | 2nd dose |                      | Comirnaty (Biontech) | 18/6/2021 | 101 | None                 | None                             |
| C2.403 | 2 | 48 | Female | Negative | Negative | No | No  | No | 2nd dose |                      | Comirnaty (Biontech) | 19/7/2021 | 70  | None                 | None                             |
| C2.404 | 2 | 26 | Female | Negative | Negative | No | Yes | No | 1st dose | Comirnaty (Biontech) |                      | 24/9/2021 | 3   | Bronchial asthma     | None                             |
| C2.405 | 2 | 51 | Female | Negative | Negative | No | Yes | No | 2nd dose |                      | Comirnaty (Biontech) | 7/7/2021  | 82  | None                 | None                             |
| C2.406 | 2 | 39 | Female | Negative | Negative | No | No  | No | 2nd dose |                      | Comirnaty (Biontech) | 15/6/2021 | 104 | None                 | None                             |
| C2.407 | 2 | 42 | Male   | Negative | Negative | No | No  | No | 2nd dose |                      | Comirnaty (Biontech) | 19/6/2021 | 100 | Hypertension         | Ramipril                         |
| C2.408 | 2 | 31 | Female | Negative | Negative | No | No  | No | 2nd dose |                      | Comirnaty (Biontech) | 20/8/2021 | 38  | None                 | None                             |
| C2.409 | 2 | 39 | Female | Negative | Negative | No | No  | No | 2nd dose |                      | Comirnaty (Biontech) | 15/7/2021 | 74  | None                 | None                             |
| C2.410 | 2 | 35 | Male   | Negative | Negative | No | No  | No | 2nd dose |                      | Covid-19 (Moderna)   | 16/6/2021 | 103 | None                 | None                             |
| C2.411 | 2 | 39 | Female | Negative | Negative | No | No  | No | 2nd dose |                      | Comirnaty (Biontech) | 21/5/2021 | 129 | None                 | None                             |
| C2.412 | 2 | 38 | Female | Negative | Negative | No | No  | No | 2nd dose |                      | Comirnaty (Biontech) | 29/4/2021 | 151 | Hypothyroidism       | Diverse                          |
| C2.413 | 2 | 42 | Female | Negative | Negative | No | No  | No | 2nd dose |                      | Comirnaty (Biontech) | 23/7/2021 | 66  | None                 | None                             |
| C2.414 | 2 | 28 | Female | Negative | Negative | No | No  | No | 2nd dose |                      | Comirnaty (Biontech) | 5/5/2021  | 145 | None                 | None                             |
| C2.415 | 2 | 35 | Female | Negative | Negative | No | No  | No | 2nd dose |                      | Comirnaty (Biontech) | 8/7/2021  | 81  | None                 | None                             |
| C2.416 | 2 | 52 | Male   | Negative | Negative | No | No  | No | 2nd dose |                      | Comirnaty (Biontech) | 21/7/2021 | 68  | None                 | None                             |

|        |   |    |        |          |          |    |    |    |          |                      |                          |           |     |                                                                              |                                                                                         |
|--------|---|----|--------|----------|----------|----|----|----|----------|----------------------|--------------------------|-----------|-----|------------------------------------------------------------------------------|-----------------------------------------------------------------------------------------|
| C2.417 | 2 | 43 | Female | Negative | Negative | No | No | No | 2nd dose |                      | Covid-19 (Moderna)       | 28/4/2021 | 152 | None                                                                         | None                                                                                    |
| C2.418 | 2 | 51 | Female | Negative | Negative | No | No | No | 2nd dose | Comirnaty (Biontech) | Comirnaty (Biontech)     | 8/6/2021  | 111 | None                                                                         | None                                                                                    |
| C2.419 | 2 | 36 | Female | Negative | Negative | No | No | No | 2nd dose |                      | Comirnaty (Biontech)     | 27/7/2021 | 62  | Systemic lupus erythematoses, Hashimoto                                      | Prednisone, l-thyroxine, hydroxychloroquin, azathioprine, cholecalciferol, pantoprazole |
| C2.420 | 2 | 54 | Female | Negative | Negative | No | No | No | 2nd dose |                      | Comirnaty (Biontech)     | 12/6/2021 | 107 | None                                                                         | None                                                                                    |
| C2.421 | 2 | 47 | Male   | Negative | Negative | No | No | No | 2nd dose |                      | Vaxzevria (Astra-Zeneca) | 26/5/2021 | 124 | None                                                                         | None                                                                                    |
| C2.422 | 2 | 27 | Female | Negative | Negative | No | No | No | 2nd dose |                      | Comirnaty (Biontech)     | 28/5/2021 | 122 | Hypertension                                                                 | Candesartan                                                                             |
| C2.423 | 2 | 38 | Female | Negative | Negative | No | No | No | 2nd dose |                      | Comirnaty (Biontech)     | 10/2/2021 | 229 | None                                                                         | None                                                                                    |
| C2.424 | 2 | 26 | Female | Negative | Negative | No | No | No | 2nd dose |                      | Comirnaty (Biontech)     | 28/1/2021 | 242 | Hand tremor, orthostatic leg tremor, thyroid removal because of thyroid cyst | Clonazepam, l-thyroxine, potassium iodide                                               |
| C2.425 | 2 | 47 | Female | Negative | Negative | No | No | No | 2nd dose |                      | Covid-19 (Moderna)       | 18/6/2021 | 101 | None                                                                         | None                                                                                    |
| C2.426 | 2 | 27 | Female | Negative | Negative | No | No | No | 2nd dose |                      | Comirnaty (Biontech)     | 24/7/2021 | 65  | None                                                                         | None                                                                                    |
| C2.427 | 2 | 46 | Male   | Negative | Negative | No | No | No | 2nd dose |                      | Comirnaty (Biontech)     | 29/6/2021 | 90  | None                                                                         | None                                                                                    |
| C2.428 | 2 | 51 | Female | Negative | Negative | No | No | No | 2nd dose | Comirnaty (Biontech) | Comirnaty (Biontech)     | 8/6/2021  | 111 | None                                                                         | None                                                                                    |
| C2.429 | 2 | 28 | Female | Negative | Negative | No | No | No | 2nd dose |                      | Comirnaty (Biontech)     | 15/6/2021 | 104 | None                                                                         | None                                                                                    |
| C2.430 | 2 | 54 | Female | Negative | Negative | No | No | No | 1st dose | Johnson & Johnson    |                          | 20/5/2021 | 130 | None                                                                         | None                                                                                    |
| C2.431 | 2 | 50 | Male   | Negative | Negative | No | No | No | 2nd dose |                      | Comirnaty (Biontech)     | 11/8/2021 | 47  | None                                                                         | None                                                                                    |
| C2.432 | 2 | 73 | Female | Negative | Negative | No | No | No | 2nd dose | Comirnaty (Biontech) | Comirnaty (Biontech)     | 13/5/2021 | 137 | Hypertension                                                                 | Candesartan, lercanidipin                                                               |
| C2.433 | 2 | 54 | Male   | Negative | Negative | No | No | No | 2nd dose |                      | Comirnaty (Biontech)     | 25/6/2021 | 94  | Hypertension                                                                 | Candesartan                                                                             |
| C2.434 | 2 | 36 | Female | Negative | Negative | No | No | No | 2nd dose |                      | Comirnaty (Biontech)     | 30/6/2021 | 89  | None                                                                         | None                                                                                    |

|        |   |    |        |          |          |    |     |    |              |                      |                          |           |     |                          |                               |
|--------|---|----|--------|----------|----------|----|-----|----|--------------|----------------------|--------------------------|-----------|-----|--------------------------|-------------------------------|
| C2.435 | 2 | 37 | Male   | Negative | Negative | No | No  | No | 2nd dose     |                      | Comirnaty (Biontech)     | 30/6/2021 | 89  | None                     | None                          |
| C2.436 | 2 | 44 | Female | Negative | Negative | No | No  | No | 2nd dose     |                      | Comirnaty (Biontech)     | 28/7/2021 | 61  | Mental disorder          | Mirtazapin                    |
| C2.437 | 2 | 19 | Male   | Negative | Negative | No | No  | No | Unvaccinated |                      |                          |           |     | None                     | None                          |
| C2.438 | 2 | 29 | Female | Negative | Negative | No | No  | No | 2nd dose     |                      | Covid-19 (Moderna)       | 29/4/2021 | 151 | None                     | None                          |
| C2.439 | 2 | 35 | Female | Negative | Negative | No | No  | No | 2nd dose     |                      | Comirnaty (Biontech)     | 19/8/2021 | 39  | None                     | None                          |
| C2.440 | 2 | 59 | Male   | Negative | Negative | No | No  | No | 2nd dose     |                      | Vaxzevria (Astra-Zeneca) | 13/7/2021 | 76  | None                     | None                          |
| C2.441 | 2 | 38 | Female | Negative | Negative | No | No  | No | 2nd dose     |                      | Comirnaty (Biontech)     | 17/2/2021 | 222 | None                     | None                          |
| C2.442 | 2 | 39 | Female | Negative | Negative | No | No  | No | 2nd dose     |                      | Covid-19 (Moderna)       | 7/7/2021  | 82  | None                     | None                          |
| C2.443 | 2 | 56 | Female | Negative | Negative | No | No  | No | 2nd dose     |                      | Comirnaty (Biontech)     | 11/6/2021 | 108 | Hypertension, acromegaly | Lanreotid, ramipril, apixaban |
| C2.444 | 2 | 46 | Female | Negative | Negative | No | No  | No | 2nd dose     |                      | Comirnaty (Biontech)     | 21/7/2021 | 68  | None                     | None                          |
| C2.445 | 2 | 51 | Female | Negative | Negative | No | No  | No | 2nd dose     |                      | Comirnaty (Biontech)     | 15/6/2021 | 104 | None                     | None                          |
| C2.446 | 2 | 47 | Male   | Negative | Negative | No | No  | No | 2nd dose     |                      | Comirnaty (Biontech)     | 23/6/2021 | 96  | Hypertension             | Candesartan                   |
| C2.447 | 2 | 53 | Male   | Negative | Negative | No | No  | No | 2nd dose     |                      | Comirnaty (Biontech)     | 21/5/2021 | 129 | None                     | None                          |
| C2.448 | 2 | 31 | Female | Negative | Negative | No | No  | No | 2nd dose     |                      | Comirnaty (Biontech)     | 20/7/2021 | 69  | None                     | None                          |
| C2.449 | 2 | 64 | Female | Negative | Negative | No | No  | No | 2nd dose     |                      | Comirnaty (Biontech)     | 6/7/2021  | 83  | None                     | None                          |
| C2.450 | 2 | 48 | Female | Negative | Negative | No | No  | No | 2nd dose     |                      | Comirnaty (Biontech)     | 21/6/2021 | 98  | Diabetes type 1          | Insulin                       |
| C2.451 | 2 | 55 | Male   | Negative | Negative | No | No  | No | 2nd dose     |                      | Comirnaty (Biontech)     | 13/7/2021 | 76  | None                     | None                          |
| C2.452 | 2 | 23 | Female | Negative | Negative | No | No  | No | 2nd dose     |                      | Comirnaty (Biontech)     | 29/5/2021 | 121 | None                     | None                          |
| C2.453 | 2 | 50 | Female | Negative | Negative | No | No  | No | 2nd dose     | Comirnaty (Biontech) | Comirnaty (Biontech)     | 14/6/2021 | 105 | Hypertension             | Metoprolol                    |
| C2.454 | 2 | 51 | Male   | Negative | Negative | No | No  | No | 2nd dose     |                      | Comirnaty (Biontech)     | 13/7/2021 | 76  | None                     | None                          |
| C2.455 | 2 | 49 | Male   | Negative | Negative | No | Yes | No | 1st dose     | Comirnaty (Biontech) |                          | 27/4/2021 | 153 | None                     | None                          |
| C2.456 | 2 | 34 | Male   | Negative | Negative | No | No  | No | 2nd dose     |                      | Comirnaty (Biontech)     | 9/8/2021  | 49  | Tourette syndrome        | Aripiprazole                  |

|        |   |    |        |          |          |    |        |     |              |                      |                      |           |     |                                     |                                  |
|--------|---|----|--------|----------|----------|----|--------|-----|--------------|----------------------|----------------------|-----------|-----|-------------------------------------|----------------------------------|
| C2.457 | 2 | 48 | Male   | Negative | Negative | No | No     | No  | 2nd dose     |                      | Comirnaty (Biontech) | 15/8/2021 | 43  | None                                | None                             |
| C2.458 | 2 | 25 | Female | Negative | Negative | No | No     | No  | 2nd dose     |                      | Comirnaty (Biontech) | 25/1/2021 | 245 | Bronchial asthma                    | None                             |
| C2.459 | 2 | 58 | Male   | Negative | Negative | No | No     | No  | 2nd dose     |                      | Comirnaty (Biontech) | 12/2/2021 | 227 | None                                | None                             |
| C2.460 | 2 | 27 | Female | Negative | Negative | No | No     | No  | 2nd dose     |                      | Comirnaty (Biontech) | 27/7/2021 | 62  | None                                | None                             |
| C2.461 | 2 | 28 | Female | Negative | Negative | No | Yes    | Yes | 1st dose     | Comirnaty (Biontech) |                      | 21/5/2021 | 129 | None                                | None                             |
| C2.462 | 2 | 69 | Male   | Negative | Negative | No | No     | No  | 2nd dose     |                      | Comirnaty (Biontech) | 28/5/2021 | 122 | Hypertension, neurological disorder | Ramipril, primidone, propranolol |
| C2.463 | 2 | 47 | Male   | Negative | Negative | No | No     | No  | 2nd dose     |                      | Comirnaty (Biontech) | 24/6/2021 | 95  | None                                | None                             |
| C2.464 | 2 | 45 | Male   | Negative | Negative | No | No     | No  | 2nd dose     |                      | Comirnaty (Biontech) | 10/6/2021 | 109 | None                                | None                             |
| C2.465 | 2 | 49 | Male   | Negative | Negative | No | No     | No  | 2nd dose     |                      | Comirnaty (Biontech) | 15/6/2021 | 104 | Hypertension                        | Candesartan                      |
| C2.466 | 2 | 66 | Male   | Negative | Negative | No | No     | No  | 2nd dose     |                      | Comirnaty (Biontech) | 6/7/2021  | 83  | None                                | None                             |
| C2.467 | 2 | 54 | Female | Negative | Negative | No | No     | No  | 1st dose     | Johnson & Johnson    |                      | 31/5/2021 | 119 | Hypertension                        | Ramipril                         |
| C2.468 | 2 | 43 | Female | Negative | Negative | No | No     | No  | 2nd dose     |                      | Comirnaty (Biontech) | 19/5/2021 | 131 | None                                | None                             |
| C2.469 | 2 | 52 | Male   | Negative | Negative | No | No     | No  | 2nd dose     |                      | Comirnaty (Biontech) | 30/6/2021 | 89  | Hypertension, aortic coarctation    | Pindolol                         |
| C2.470 | 2 | 29 | Female | Negative | Negative | No | No     | No  | 2nd dose     |                      | Comirnaty (Biontech) | 27/7/2021 | 62  | None                                | None                             |
| C2.471 | 2 | 56 | Female | Negative | Negative | No | No     | No  | 2nd dose     |                      | Johnson & Johnson    | 6/5/2021  | 144 | None                                | None                             |
| C2.472 | 2 | 20 | Female | Negative | Negative | No | No     | No  | Unvaccinated |                      |                      |           |     | None                                | None                             |
| C2.473 | 2 | 51 | Female | Negative | Negative | No | No     | No  | 2nd dose     |                      | Comirnaty (Biontech) | 22/6/2021 | 97  | Hypertension                        | Verapamil, doxazosin             |
| C2.474 | 2 | 38 | Female | Negative | Negative | No | No     | No  | 2nd dose     |                      | Covid-19 (Moderna)   | 1/5/2021  | 149 | Thyroid disorder                    | L-thyroxine                      |
| C2.475 | 2 | 41 | Male   | Negative | Negative | No | No     | No  | 2nd dose     |                      | Johnson & Johnson    | 10/6/2021 | 109 | None                                | None                             |
| C2.476 | 2 | 32 | Male   | Negative | Negative | No | No     | No  | 2nd dose     |                      | Johnson & Johnson    | 19/6/2021 | 100 | None                                | None                             |
| C2.477 | 2 | 47 | Male   | Negative | Negative | No | Unsure | No  | 2nd dose     |                      | Comirnaty (Biontech) | 15/7/2021 | 74  | None                                | None                             |
| C2.478 | 2 | 31 | Female | Negative | Negative | No | No     | No  | 2nd dose     |                      | Comirnaty (Biontech) | 27/6/2021 | 92  | None                                | None                             |

|        |   |    |        |          |          |    |     |    |              |                      |                      |           |     |                                             |                                       |
|--------|---|----|--------|----------|----------|----|-----|----|--------------|----------------------|----------------------|-----------|-----|---------------------------------------------|---------------------------------------|
| C2.479 | 2 | 47 | Male   | Negative | Negative | No | No  | No | 2nd dose     |                      | Comirnaty (Biontech) | 31/8/2021 | 27  | Hypertension                                | None                                  |
| C2.480 | 2 | 44 | Female | Negative | Negative | No | Yes | No | 1st dose     | Comirnaty (Biontech) |                      | 12/4/2021 | 168 | None                                        | None                                  |
| C2.481 | 2 | 40 | Female | Negative | Negative | No | No  | No | 2nd dose     |                      | Comirnaty (Biontech) | 7/5/2021  | 143 | None                                        | None                                  |
| C2.482 | 2 | 30 | Male   | Negative | Negative | No | No  | No | 2nd dose     |                      | Comirnaty (Biontech) | 16/6/2021 | 103 | None                                        | None                                  |
| C2.483 | 2 | 69 | Male   | Negative | Negative | No | No  | No | 1st dose     | Johnson & Johnson    |                      | 4/6/2021  | 115 | Ulcerative colitis                          | Mesalazine, pantoprazole              |
| C2.484 | 2 | 46 | Female | Negative | Negative | No | No  | No | 2nd dose     |                      | Comirnaty (Biontech) | 29/5/2021 | 121 | None                                        | None                                  |
| C2.485 | 2 | 42 | Male   | Negative | Negative | No | No  | No | 2nd dose     |                      | Covid-19 (Moderna)   | 25/7/2021 | 64  | None                                        | None                                  |
| C2.486 | 2 | 56 | Female | Negative | Negative | No | No  | No | Unvaccinated |                      |                      |           |     | None                                        | None                                  |
| C2.487 | 2 | 56 | Male   | Negative | Negative | No | No  | No | 2nd dose     |                      | Comirnaty (Biontech) | 6/6/2021  | 113 | None                                        | None                                  |
| C2.488 | 2 | 26 | Female | Negative | Negative | No | No  | No | 2nd dose     |                      | Comirnaty (Biontech) | 25/7/2021 | 64  | None                                        | None                                  |
| C2.489 | 2 | 30 | Female | Negative | Negative | No | No  | No | 2nd dose     |                      | Comirnaty (Biontech) | 15/8/2021 | 43  | None                                        | None                                  |
| C2.490 | 2 | 34 | Male   | Negative | Negative | No | No  | No | 2nd dose     |                      | Comirnaty (Biontech) | 9/6/2021  | 110 | None                                        | None                                  |
| C2.491 | 2 | 41 | Female | Negative | Negative | No | No  | No | 2nd dose     |                      | Comirnaty (Biontech) | 15/6/2021 | 104 | None                                        | None                                  |
| C2.492 | 2 | 26 | Female | Negative | Negative | No | No  | No | 2nd dose     |                      | Comirnaty (Biontech) | 18/5/2021 | 132 | None                                        | None                                  |
| C2.493 | 2 | 43 | Male   | Negative | Negative | No | No  | No | 2nd dose     |                      | Comirnaty (Biontech) | 22/6/2021 | 97  | Asthma, neurodermatitis, hay fever, allergy | Formoterol+beclomethasone, salbutamol |
| C2.494 | 2 | 50 | Female | Negative | Negative | No | No  | No | 2nd dose     |                      | Comirnaty (Biontech) | 18/5/2021 | 132 | Hypertension                                | Candesartan                           |
| C2.495 | 2 | 26 | Female | Negative | Negative | No | No  | No | Unvaccinated |                      |                      |           |     | None                                        | None                                  |
| C2.496 | 2 | 38 | Female | Negative | Negative | No | No  | No | 2nd dose     |                      | Johnson & Johnson    | 30/5/2021 | 120 | Hypertension                                | Candesartan                           |
| C2.497 | 2 | 25 | Male   | Negative | Negative | No | No  | No | 2nd dose     |                      | Comirnaty (Biontech) | 25/6/2021 | 94  | None                                        | None                                  |
| C2.498 | 2 | 53 | Female | Negative | Negative | No | No  | No | 2nd dose     |                      | Comirnaty (Biontech) | 14/7/2021 | 75  | None                                        | None                                  |
| C2.499 | 2 | 41 | Male   | Negative | Negative | No | No  | No | 2nd dose     |                      | Comirnaty (Biontech) | 20/6/2021 | 99  | Hypertension                                | None                                  |
| C2.500 | 2 | 53 | Female | Negative | Negative | No | No  | No | 2nd dose     |                      | Comirnaty (Biontech) | 19/5/2021 | 131 | Breast cancer                               | Tamoxifen                             |
| C2.501 | 2 | 32 | Female | Negative | Negative | No | No  | No | 2nd dose     |                      | Comirnaty (Biontech) | 20/7/2021 | 69  | Diabetes type 2                             | None                                  |

|        |   |    |        |          |          |    |     |    |          |                      |                          |           |     |                 |                                   |
|--------|---|----|--------|----------|----------|----|-----|----|----------|----------------------|--------------------------|-----------|-----|-----------------|-----------------------------------|
| C2.502 | 2 | 37 | Male   | Negative | Negative | No | No  | No | 2nd dose |                      | Comirnaty (Biontech)     | 10/6/2021 | 109 | None            | None                              |
| C2.503 | 2 | 23 | Female | Negative | Negative | No | No  | No | 2nd dose |                      | Covid-19 (Moderna)       | 14/6/2021 | 105 | None            | None                              |
| C2.504 | 2 | 40 | Female | Negative | Negative | No | No  | No | 2nd dose |                      | Comirnaty (Biontech)     | 31/5/2021 | 119 | Mental disorder | Sertraline                        |
| C2.505 | 2 | 40 | Female | Negative | Negative | No | No  | No | 2nd dose |                      | Comirnaty (Biontech)     | 15/7/2021 | 74  | None            | None                              |
| C2.506 | 2 | 52 | Male   | Negative | Negative | No | No  | No | 2nd dose |                      | Comirnaty (Biontech)     | 15/8/2021 | 43  | None            | None                              |
| C2.507 | 2 | 21 | Female | Negative | Negative | No | No  | No | 2nd dose |                      | Covid-19 (Moderna)       | 1/7/2021  | 88  | None            | None                              |
| C2.508 | 2 | 28 | Female | Negative | Negative | No | No  | No | 2nd dose |                      | Covid-19 (Moderna)       | 25/7/2021 | 64  | None            | None                              |
| C2.509 | 2 | 35 | Female | Negative | Negative | No | No  | No | 2nd dose |                      | Covid-19 (Moderna)       | 8/6/2021  | 111 | None            | None                              |
| C2.510 | 2 | 56 | Female | Negative | Negative | No | No  | No | 2nd dose |                      | Comirnaty (Biontech)     | 17/8/2021 | 41  | Hypertension    | Candesartan, nebivolol            |
| C2.511 | 2 | 47 | Female | Negative | Negative | No | No  | No | 2nd dose |                      | Comirnaty (Biontech)     | 10/8/2021 | 48  | None            | None                              |
| C2.512 | 2 | 49 | Male   | Negative | Negative | No | No  | No | 2nd dose |                      | Comirnaty (Biontech)     | 25/6/2021 | 94  | Hypertension    | Chlortalidone, candesartan        |
| C2.513 | 2 | 51 | Female | Negative | Negative | No | No  | No | 2nd dose |                      | Comirnaty (Biontech)     | 22/6/2021 | 97  | None            | None                              |
| C2.514 | 2 | 60 | Female | Negative | Negative | No | No  | No | 2nd dose |                      | Comirnaty (Biontech)     | 22/6/2021 | 97  | None            | None                              |
| C2.515 | 2 | 53 | Female | Negative | Negative | No | Yes | No | 1st dose | Comirnaty (Biontech) |                          | 3/8/2021  | 55  | None            | None                              |
| C2.516 | 2 | 39 | Female | Negative | Negative | No | No  | No | 2nd dose |                      | Johnson & Johnson        | 2/6/2021  | 117 | None            | None                              |
| C2.517 | 2 | 34 | Female | Negative | Negative | No | No  | No | 2nd dose |                      | Comirnaty (Biontech)     | 14/6/2021 | 105 | None            | None                              |
| C2.518 | 2 | 56 | Female | Negative | Negative | No | No  | No | 2nd dose |                      | Comirnaty (Biontech)     | 22/6/2021 | 97  | Hypertension    | Ramipril                          |
| C2.519 | 2 | 66 | Male   | Negative | Negative | No | No  | No | 2nd dose |                      | Vaxzevria (Astra-Zeneca) | 26/6/2021 | 93  | None            | None                              |
| C2.520 | 2 | 28 | Female | Negative | Negative | No | No  | No | 2nd dose |                      | Comirnaty (Biontech)     | 12/6/2021 | 107 | Asthma          | Formoterol+budesonide, salbutamol |
| C2.521 | 2 | 35 | Male   | Negative | Negative | No | No  | No | 2nd dose |                      | Covid-19 (Moderna)       | 31/5/2021 | 119 | Hypertension    | Antihypertensives                 |
| C2.522 | 2 | 42 | Male   | Negative | Negative | No | No  | No | 2nd dose |                      | Comirnaty (Biontech)     | 10/8/2021 | 48  | None            | None                              |

|        |   |    |        |          |          |    |    |    |          |                      |                      |           |     |                                                            |                                              |
|--------|---|----|--------|----------|----------|----|----|----|----------|----------------------|----------------------|-----------|-----|------------------------------------------------------------|----------------------------------------------|
| C2.523 | 2 | 47 | Female | Negative | Negative | No | No | No | 2nd dose |                      | Covid-19 (Moderna)   | 4/3/2021  | 207 | Thyroid disorder, mental disorder                          | L-thyroxine, gabapentin, paroxetine          |
| C2.524 | 2 | 37 | Female | Negative | Negative | No | No | No | 2nd dose |                      | Comirnaty (Biontech) | 24/6/2021 | 95  | None                                                       | None                                         |
| C2.525 | 2 | 48 | Female | Negative | Negative | No | No | No | 2nd dose |                      | Comirnaty (Biontech) | 30/4/2021 | 150 | Renal failure, prothrombin gene mutation, thyroid disorder | Atorvastatin, l-thyroxine, cholecalciferol   |
| C2.526 | 2 | 38 | Male   | Negative | Negative | No | No | No | 2nd dose |                      | Comirnaty (Biontech) | 21/6/2021 | 98  | Hypertension                                               | Antihypertensives                            |
| C2.527 | 2 | 53 | Male   | Negative | Negative | No | No | No | 2nd dose |                      | Comirnaty (Biontech) | 16/6/2021 | 103 | None                                                       | None                                         |
| C2.528 | 2 | 53 | Male   | Negative | Negative | No | No | No | 2nd dose |                      | Comirnaty (Biontech) | 12/8/2021 | 46  | None                                                       | None                                         |
| C2.529 | 2 | 44 | Female | Negative | Negative | No | No | No | 2nd dose |                      | Comirnaty (Biontech) | 11/6/2021 | 108 | Hypertension, thyroid disorder                             | Ramipril, l-thyroxine                        |
| C2.530 | 2 | 27 | Female | Negative | Negative | No | No | No | 2nd dose |                      | Covid-19 (Moderna)   | 25/5/2021 | 125 | Hypertension, thyroid disorder                             | Candesartan, l-thyroxine                     |
| C2.531 | 2 | 20 | Female | Negative | Negative | No | No | No | 2nd dose |                      | Comirnaty (Biontech) | 15/7/2021 | 74  | None                                                       | None                                         |
| C2.532 | 2 | 53 | Male   | Negative | Negative | No | No | No | 2nd dose |                      | Johnson & Johnson    | 27/5/2021 | 123 | Hypertension, diabetes                                     | Telmisartan, hydrochlorothiazide, amlodipine |
| C2.533 | 2 | 18 | Female | Negative | Negative | No | No | No | 1st dose | Comirnaty (Biontech) |                      | 22/9/2021 | 5   | None                                                       | None                                         |
| C2.534 | 2 | 23 | Female | Negative | Negative | No | No | No | 2nd dose |                      | Comirnaty (Biontech) | 21/6/2021 | 98  | None                                                       | None                                         |
| C2.535 | 2 | 44 | Male   | Negative | Negative | No | No | No | 2nd dose |                      | Comirnaty (Biontech) | 21/7/2021 | 68  | None                                                       | None                                         |
| C2.536 | 2 | 39 | Female | Negative | Negative | No | No | No | 2nd dose |                      | Comirnaty (Biontech) | 23/7/2021 | 66  | None                                                       | None                                         |
| C2.537 | 2 | 18 | Female | Negative | Negative | No | No | No | 2nd dose |                      | Comirnaty (Biontech) | 11/7/2021 | 78  | None                                                       | None                                         |
| C2.538 | 2 | 18 | Female | Negative | Negative | No | No | No | 2nd dose |                      | Comirnaty (Biontech) | 11/7/2021 | 78  | None                                                       | None                                         |
| C2.539 | 2 | 19 | Male   | Negative | Negative | No | No | No | 2nd dose |                      | Johnson & Johnson    | 25/6/2021 | 94  | None                                                       | None                                         |
| C2.540 | 2 | 43 | Female | Negative | Negative | No | No | No | 2nd dose |                      | Comirnaty (Biontech) | 16/6/2021 | 103 | Allergy                                                    | Cimetidine                                   |
| C2.541 | 2 | 30 | Female | Negative | Negative | No | No | No | 2nd dose |                      | Comirnaty (Biontech) | 20/8/2021 | 38  | None                                                       | None                                         |
| C2.542 | 2 | 47 | Female | Negative | Negative | No | No | No | 2nd dose |                      | Comirnaty (Biontech) | 30/4/2021 | 150 | None                                                       | None                                         |



|        |   |     |        |          |          |    |        |    |          |                      |                          |           |     |                   |             |
|--------|---|-----|--------|----------|----------|----|--------|----|----------|----------------------|--------------------------|-----------|-----|-------------------|-------------|
| C2.543 | 2 | 48  | Female | Negative | Negative | No | No     | No | 2nd dose |                      | Comirnaty (Biontech)     | 26/5/2021 | 124 | None              | None        |
| C2.544 | 2 | 34  | Male   | Negative | Negative | No | No     | No | 2nd dose |                      | Comirnaty (Biontech)     | 22/7/2021 | 67  | None              | None        |
| C2.545 | 2 | 49  | Male   | Negative | Negative | No | No     | No | 1st dose | Johnson & Johnson    |                          | 8/6/2021  | 111 | None              | None        |
| C2.546 | 2 | 51  | Male   | Negative | Negative | No | No     | No | 2nd dose |                      | Covid-19 (Moderna)       | 28/6/2021 | 91  | None              | None        |
| C2.547 | 2 | 30  | Female | Negative | Negative | No | No     | No | 2nd dose |                      | Comirnaty (Biontech)     | 22/7/2021 | 67  | None              | None        |
| C2.548 | 2 | 21  | Female | Negative | Negative | No | No     | No | 2nd dose |                      | Comirnaty (Biontech)     | 12/2/2021 | 227 | Hashimoto         | L-thyroxine |
| C2.549 | 2 | 37  | Male   | Negative | Negative | No | No     | No | 2nd dose |                      | Comirnaty (Biontech)     | 19/7/2021 | 70  | Chronic Urticaria | Omalizumab  |
| C2.550 | 2 | 46  | Female | Negative | Negative | No | No     | No | 1st dose | Johnson & Johnson    |                          | 3/6/2021  | 116 | None              | None        |
| C2.551 | 2 | N/A | Female | Negative | Negative | No | No     | No | 2nd dose |                      | Comirnaty (Biontech)     | 11/6/2021 | 108 | Hashimoto         | L-thyroxine |
| C2.552 | 2 | 35  | Female | Negative | Negative | No | No     | No | 2nd dose |                      | Comirnaty (Biontech)     | 17/6/2021 | 102 | None              | None        |
| C2.553 | 2 | 36  | Female | Negative | Negative | No | Yes    | No | 1st dose | Comirnaty (Biontech) |                          | 23/9/2021 | 4   | None              | None        |
| C2.554 | 2 | 47  | Female | Negative | Negative | No | No     | No | 2nd dose |                      | Comirnaty (Biontech)     | 7/7/2021  | 82  | None              | None        |
| C2.555 | 2 | 32  | Female | Negative | Negative | No | Unsure | No | 2nd dose |                      | Comirnaty (Biontech)     | 15/7/2021 | 74  | None              | None        |
| C2.556 | 2 | 36  | Female | Negative | Negative | No | No     | No | 2nd dose |                      | Comirnaty (Biontech)     | 7/7/2021  | 82  | None              | None        |
| C2.557 | 2 | 30  | Female | Negative | Negative | No | No     | No | 2nd dose |                      | Covid-19 (Moderna)       | 29/6/2021 | 90  | None              | None        |
| C2.558 | 2 | 43  | Female | Negative | Negative | No | No     | No | 2nd dose |                      | Vaxzevria (Astra-Zeneca) | 14/5/2021 | 136 | Hypertension      | Losartan    |
| C2.559 | 2 | 45  | Female | Negative | Negative | No | No     | No | 1st dose | Johnson & Johnson    |                          | 5/5/2021  | 145 | Hashimoto         | L-thyroxine |
| C2.560 | 2 | 35  | Female | Negative | Negative | No | No     | No | 1st dose | Johnson & Johnson    |                          | 27/5/2021 | 123 | None              | None        |
| C2.561 | 2 | 53  | Female | Negative | Negative | No | No     | No | 2nd dose |                      | Comirnaty (Biontech)     | 15/7/2021 | 74  | None              | None        |
| C2.562 | 2 | 21  | Female | Negative | Negative | No | No     | No | 2nd dose |                      | Comirnaty (Biontech)     | 3/2/2021  | 236 | None              | None        |
| C2.563 | 2 | 54  | Female | Negative | Negative | No | No     | No | 2nd dose |                      | Comirnaty (Biontech)     | 29/5/2021 | 121 | None              | None        |
| C2.564 | 2 | 45  | Female | Negative | Negative | No | Yes    | No | 2nd dose |                      | Comirnaty (Biontech)     | 15/7/2021 | 74  | None              | None        |

|        |   |    |        |          |          |    |        |    |              |  |                          |           |     |                              |                                |
|--------|---|----|--------|----------|----------|----|--------|----|--------------|--|--------------------------|-----------|-----|------------------------------|--------------------------------|
| C2.565 | 2 | 18 | Female | Negative | Negative | No | No     | No | 2nd dose     |  | Comirnaty (Biontech)     | 11/6/2021 | 108 | None                         | None                           |
| C2.566 | 2 | 32 | Female | Negative | Negative | No | No     | No | 2nd dose     |  | Comirnaty (Biontech)     | 5/6/2021  | 114 | None                         | None                           |
| C2.567 | 2 | 51 | Female | Negative | Negative | No | No     | No | 2nd dose     |  | Comirnaty (Biontech)     | 16/6/2021 | 103 | Hypertension, hypothyroidism | Metoprolol, l-thyroxine        |
| C2.568 | 2 | 47 | Female | Negative | Negative | No | No     | No | 2nd dose     |  | Covid-19 (Moderna)       | 29/6/2021 | 90  | None                         | None                           |
| C2.569 | 2 | 30 | Male   | Negative | Negative | No | No     | No | 2nd dose     |  | Covid-19 (Moderna)       | 25/7/2021 | 64  | None                         | None                           |
| C2.570 | 2 | 22 | Male   | Negative | Negative | No | No     | No | 2nd dose     |  | Comirnaty (Biontech)     | 12/3/2021 | 199 | None                         | None                           |
| C2.571 | 2 | 31 | Male   | Negative | Negative | No | No     | No | 2nd dose     |  | Comirnaty (Biontech)     | 29/5/2021 | 121 | None                         | None                           |
| C2.572 | 2 | 48 | Female | Negative | Negative | No | No     | No | 2nd dose     |  | Comirnaty (Biontech)     | 9/6/2021  | 110 | Hypertension                 | Ramipril, amlodipine, letrozol |
| C2.573 | 2 | 30 | Male   | Negative | Negative | No | No     | No | Unvaccinated |  |                          |           |     | None                         | None                           |
| C2.574 | 2 | 45 | Female | Negative | Negative | No | No     | No | 2nd dose     |  | Comirnaty (Biontech)     | 26/7/2021 | 63  | None                         | None                           |
| C2.575 | 2 | 40 | Female | Negative | Negative | No | No     | No | 2nd dose     |  | Comirnaty (Biontech)     | 27/5/2021 | 123 | None                         | None                           |
| C2.576 | 2 | 52 | Female | Negative | Negative | No | No     | No | 2nd dose     |  | Comirnaty (Biontech)     | 9/6/2021  | 110 | None                         | None                           |
| C2.577 | 2 | 62 | Female | Negative | Negative | No | No     | No | 2nd dose     |  | Vaxzevria (Astra-Zeneca) | 26/6/2021 | 93  | None                         | None                           |
| C2.578 | 2 | 26 | Female | Negative | Negative | No | No     | No | Unvaccinated |  |                          |           |     | None                         | None                           |
| C2.579 | 2 | 59 | Female | Negative | Negative | No | No     | No | 2nd dose     |  | Comirnaty (Biontech)     | 15/7/2021 | 74  | None                         | None                           |
| C2.580 | 2 | 49 | Male   | Negative | Negative | No | Unsure | No | 2nd dose     |  | Comirnaty (Biontech)     | 16/7/2021 | 73  | None                         | None                           |
| C2.581 | 2 | 38 | Female | Negative | Negative | No | No     | No | 2nd dose     |  | Comirnaty (Biontech)     | 15/6/2021 | 104 | Thyroid disorder             | L-thyroxine                    |
| C2.582 | 2 | 27 | Female | Negative | Negative | No | No     | No | 2nd dose     |  | Comirnaty (Biontech)     | 16/6/2021 | 103 | None                         | None                           |
| C2.583 | 2 | 40 | Female | Negative | Negative | No | No     | No | 2nd dose     |  | Comirnaty (Biontech)     | 3/6/2021  | 116 | None                         | None                           |
| C2.584 | 2 | 29 | Male   | Negative | Negative | No | No     | No | 2nd dose     |  | Comirnaty (Biontech)     | 12/6/2021 | 107 | None                         | None                           |
| C2.585 | 2 | 22 | Female | Negative | Negative | No | No     | No | 2nd dose     |  | Johnson & Johnson        | 8/6/2021  | 111 | None                         | None                           |
| C2.586 | 2 | 26 | Female | Negative | Negative | No | No     | No | 2nd dose     |  | Comirnaty (Biontech)     | 6/7/2021  | 83  | None                         | None                           |

|        |   |    |        |          |          |    |        |    |          |                      |                      |           |     |                                            |                                        |
|--------|---|----|--------|----------|----------|----|--------|----|----------|----------------------|----------------------|-----------|-----|--------------------------------------------|----------------------------------------|
| C2.587 | 2 | 56 | Male   | Negative | Negative | No | No     | No | 2nd dose |                      | Comirnaty (Biontech) | 7/5/2021  | 143 | None                                       | None                                   |
| C2.588 | 2 | 31 | Female | Negative | Negative | No | No     | No | 2nd dose |                      | Covid-19 (Moderna)   | 19/7/2021 | 70  | Thyroid disorder                           | L-thyroxine                            |
| C2.589 | 2 | 37 | Female | Negative | Negative | No | No     | No | 2nd dose |                      | Comirnaty (Biontech) | 13/9/2021 | 14  | Morbus Crohn                               | Ustekinumab, allopurinol, azathioprine |
| C2.590 | 2 | 30 | Female | Negative | Negative | No | No     | No | 2nd dose |                      | Covid-19 (Moderna)   | 29/6/2021 | 90  | None                                       | None                                   |
| C2.591 | 2 | 43 | Male   | Negative | Negative | No | No     | No | 2nd dose |                      | Comirnaty (Biontech) | 13/8/2021 | 45  | None                                       | None                                   |
| C2.592 | 2 | 32 | Female | Negative | Negative | No | No     | No | 2nd dose |                      | Comirnaty (Biontech) | 18/6/2021 | 101 | None                                       | None                                   |
| C2.593 | 2 | 40 | Female | Negative | Negative | No | No     | No | 2nd dose |                      | Covid-19 (Moderna)   | 10/6/2021 | 109 | Thyroid disorder                           | L-thyroxine                            |
| C2.594 | 2 | 23 | Female | Negative | Negative | No | No     | No | 2nd dose |                      | Comirnaty (Biontech) | 21/6/2021 | 98  | None                                       | None                                   |
| C2.595 | 2 | 20 | Male   | Negative | Negative | No | Unsure | No | 2nd dose |                      | Comirnaty (Biontech) | 21/7/2021 | 68  | None                                       | None                                   |
| C2.596 | 2 | 37 | Female | Negative | Negative | No | No     | No | 2nd dose |                      | Comirnaty (Biontech) | 2/7/2021  | 87  | None                                       | None                                   |
| C2.597 | 2 | 26 | Female | Negative | Negative | No | Unsure | No | 2nd dose |                      | Comirnaty (Biontech) | 17/8/2021 | 41  | None                                       | None                                   |
| C2.598 | 2 | 50 | Female | Negative | Negative | No | No     | No | 2nd dose | Covid-19 (Moderna)   | Covid-19 (Moderna)   | 21/7/2021 | 68  | None                                       | None                                   |
| C2.599 | 2 | 35 | Female | Negative | Negative | No | No     | No | 2nd dose |                      | Comirnaty (Biontech) | 22/6/2021 | 97  | None                                       | None                                   |
| C2.600 | 2 | 22 | Female | Negative | Negative | No | No     | No | 2nd dose |                      | Comirnaty (Biontech) | 16/6/2021 | 103 | None                                       | None                                   |
| C2.601 | 2 | 37 | Female | Negative | Negative | No | No     | No | 2nd dose |                      | Covid-19 (Moderna)   | 25/7/2021 | 64  | None                                       | None                                   |
| C2.602 | 2 | 42 | Female | Negative | Negative | No | Unsure | No | 2nd dose | Comirnaty (Biontech) | Comirnaty (Biontech) | 17/8/2021 | 41  | None                                       | None                                   |
| C2.603 | 2 | 24 | Female | Negative | Negative | No | No     | No | 2nd dose |                      | Comirnaty (Biontech) | 7/7/2021  | 82  | None                                       | None                                   |
| C2.604 | 2 | 37 | Female | Negative | Negative | No | Unsure | No | 2nd dose |                      | Comirnaty (Biontech) | 27/5/2021 | 123 | Celiac disease, asthma, insulin resistance | Metformin, fluticasone+vilanterol      |
| C2.605 | 2 | 36 | Female | Negative | Negative | No | No     | No | 2nd dose |                      | Comirnaty (Biontech) | 26/7/2021 | 63  | None                                       | None                                   |
| C2.606 | 2 | 28 | Male   | Negative | Negative | No | No     | No | 2nd dose |                      | Comirnaty (Biontech) | 21/7/2021 | 68  | Asthma                                     | None                                   |
| C2.607 | 2 | 22 | Female | Negative | Negative | No | No     | No | 2nd dose |                      | Comirnaty (Biontech) | 17/7/2021 | 72  | None                                       | None                                   |

|        |   |     |        |          |          |    |     |     |          |     |                          |           |     |      |      |
|--------|---|-----|--------|----------|----------|----|-----|-----|----------|-----|--------------------------|-----------|-----|------|------|
| C2.608 | 2 | 29  | Male   | Negative | Negative | No | No  | No  | 2nd dose |     | Comirnaty (Biontech)     | 20/5/2021 | 130 | None | None |
| C2.609 | 2 | 25  | Female | Negative | Negative | No | No  | No  | 2nd dose |     | Vaxzevria (Astra-Zeneca) | 25/5/2021 | 125 | None | None |
| C2.610 | 2 | N/A | N/A    | Negative | Negative | No | N/A | N/A | N/A      | N/A | N/A                      | N/A       | N/A | N/A  | N/A  |
| C2.611 | 2 | N/A | N/A    | Negative | Negative | No | N/A | N/A | N/A      | N/A | N/A                      | N/A       | N/A | N/A  | N/A  |
| C2.612 | 2 | N/A | N/A    | Negative | Negative | No | N/A | N/A | N/A      | N/A | N/A                      | N/A       | N/A | N/A  | N/A  |
| C2.613 | 2 | N/A | N/A    | Negative | Negative | No | N/A | N/A | N/A      | N/A | N/A                      | N/A       | N/A | N/A  | N/A  |
| C2.614 | 2 | N/A | N/A    | Negative | Negative | No | N/A | N/A | N/A      | N/A | N/A                      | N/A       | N/A | N/A  | N/A  |
| C2.615 | 2 | N/A | N/A    | Negative | Negative | No | N/A | N/A | N/A      | N/A | N/A                      | N/A       | N/A | N/A  | N/A  |
| C2.616 | 2 | N/A | N/A    | Negative | Negative | No | N/A | N/A | N/A      | N/A | N/A                      | N/A       | N/A | N/A  | N/A  |
| C2.617 | 2 | N/A | N/A    | Negative | Negative | No | N/A | N/A | N/A      | N/A | N/A                      | N/A       | N/A | N/A  | N/A  |
| C2.618 | 2 | N/A | N/A    | Negative | Negative | No | N/A | N/A | N/A      | N/A | N/A                      | N/A       | N/A | N/A  | N/A  |
| C2.619 | 2 | N/A | N/A    | Negative | Negative | No | N/A | N/A | N/A      | N/A | N/A                      | N/A       | N/A | N/A  | N/A  |
| C2.620 | 2 | N/A | N/A    | Negative | Negative | No | N/A | N/A | N/A      | N/A | N/A                      | N/A       | N/A | N/A  | N/A  |
| C2.621 | 2 | N/A | N/A    | Negative | Negative | No | N/A | N/A | N/A      | N/A | N/A                      | N/A       | N/A | N/A  | N/A  |
| C2.622 | 2 | N/A | N/A    | Negative | Negative | No | N/A | N/A | N/A      | N/A | N/A                      | N/A       | N/A | N/A  | N/A  |
| C2.623 | 2 | N/A | N/A    | Negative | Negative | No | N/A | N/A | N/A      | N/A | N/A                      | N/A       | N/A | N/A  | N/A  |
| C2.624 | 2 | N/A | N/A    | Negative | Negative | No | N/A | N/A | N/A      | N/A | N/A                      | N/A       | N/A | N/A  | N/A  |
| C2.625 | 2 | N/A | N/A    | Negative | Negative | No | N/A | N/A | N/A      | N/A | N/A                      | N/A       | N/A | N/A  | N/A  |
| C2.626 | 2 | N/A | N/A    | Negative | Negative | No | N/A | N/A | N/A      | N/A | N/A                      | N/A       | N/A | N/A  | N/A  |
| C2.627 | 2 | N/A | N/A    | Negative | Negative | No | N/A | N/A | N/A      | N/A | N/A                      | N/A       | N/A | N/A  | N/A  |
| C2.628 | 2 | N/A | N/A    | Negative | Negative | No | N/A | N/A | N/A      | N/A | N/A                      | N/A       | N/A | N/A  | N/A  |
| C2.629 | 2 | N/A | N/A    | Negative | Negative | No | N/A | N/A | N/A      | N/A | N/A                      | N/A       | N/A | N/A  | N/A  |
| C2.630 | 2 | N/A | N/A    | Negative | Negative | No | N/A | N/A | N/A      | N/A | N/A                      | N/A       | N/A | N/A  | N/A  |
| C2.631 | 2 | N/A | N/A    | Negative | Negative | No | N/A | N/A | N/A      | N/A | N/A                      | N/A       | N/A | N/A  | N/A  |
| C2.632 | 2 | N/A | N/A    | Negative | Negative | No | N/A | N/A | N/A      | N/A | N/A                      | N/A       | N/A | N/A  | N/A  |
| C2.633 | 2 | N/A | N/A    | Negative | Negative | No | N/A | N/A | N/A      | N/A | N/A                      | N/A       | N/A | N/A  | N/A  |
| C2.634 | 2 | N/A | N/A    | Negative | Negative | No | N/A | N/A | N/A      | N/A | N/A                      | N/A       | N/A | N/A  | N/A  |
| C2.635 | 2 | N/A | N/A    | Negative | Negative | No | N/A | N/A | N/A      | N/A | N/A                      | N/A       | N/A | N/A  | N/A  |
| C2.636 | 2 | N/A | N/A    | Negative | Negative | No | N/A | N/A | N/A      | N/A | N/A                      | N/A       | N/A | N/A  | N/A  |
| C2.637 | 2 | N/A | N/A    | Negative | Negative | No | N/A | N/A | N/A      | N/A | N/A                      | N/A       | N/A | N/A  | N/A  |
| C2.638 | 2 | N/A | N/A    | Negative | Negative | No | N/A | N/A | N/A      | N/A | N/A                      | N/A       | N/A | N/A  | N/A  |

|        |   |     |        |          |          |    |     |     |          |                          |                      |           |     |                                      |                                                  |     |
|--------|---|-----|--------|----------|----------|----|-----|-----|----------|--------------------------|----------------------|-----------|-----|--------------------------------------|--------------------------------------------------|-----|
| C2.639 | 2 | N/A | N/A    | Negative | Negative | No | N/A | N/A | N/A      | N/A                      | N/A                  | N/A       | N/A | N/A                                  | N/A                                              | N/A |
| C2.640 | 2 | N/A | N/A    | Negative | Negative | No | N/A | N/A | N/A      | N/A                      | N/A                  | N/A       | N/A | N/A                                  | N/A                                              | N/A |
| C3.1   | 3 | 24  | Male   | Negative | Negative | No | No  | No  | 2nd dose | Comirnaty (Biontech)     | Comirnaty (Biontech) | 8/6/2021  | 116 | None                                 | None                                             |     |
| C3.2   | 3 | 24  | Female | Negative | Negative | No | No  | No  | 2nd dose | Covid-19 (Moderna)       | Covid-19 (Moderna)   | 19/7/2021 | 75  | None                                 | None                                             |     |
| C3.3   | 3 | 25  | Female | Negative | Negative | No | No  | No  | 2nd dose | Comirnaty (Biontech)     | Comirnaty (Biontech) | 9/6/2021  | 115 | None                                 | None                                             |     |
| C3.4   | 3 | 31  | Female | Negative | Negative | No | No  | No  | 2nd dose | Comirnaty (Biontech)     | Comirnaty (Biontech) | 20/8/2021 | 43  | None                                 | None                                             |     |
| C3.5   | 3 | 32  | Female | Negative | Negative | No | No  | No  | 2nd dose | Comirnaty (Biontech)     | Comirnaty (Biontech) | 19/6/2021 | 105 | None                                 | None                                             |     |
| C3.6   | 3 | 36  | Male   | Negative | Negative | No | No  | No  | 2nd dose | Vaxzevria (Astra-Zeneca) | Comirnaty (Biontech) | 20/7/2021 | 74  | HIV                                  | Bictegravir, emtricitabin, tenofovir alafenamide |     |
| C3.7   | 3 | 43  | Male   | Negative | Negative | No | No  | No  | 2nd dose | Johnson & Johnson        | Other vaccine        | 9/6/2021  | 115 | None                                 | None                                             |     |
| C3.8   | 3 | 23  | Female | Negative | Negative | No | No  | No  | 2nd dose | Comirnaty (Biontech)     | Comirnaty (Biontech) | 23/7/2021 | 71  | None                                 | None                                             |     |
| C3.9   | 3 | 30  | Male   | Negative | Negative | No | No  | No  | 2nd dose | Covid-19 (Moderna)       | Covid-19 (Moderna)   | 5/8/2021  | 58  | None                                 | None                                             |     |
| C3.10  | 3 | 45  | Male   | Negative | Negative | No | No  | No  | 2nd dose | Comirnaty (Biontech)     | Comirnaty (Biontech) | 10/9/2021 | 22  | None                                 | None                                             |     |
| C3.11  | 3 | 48  | Female | Negative | Negative | No | No  | No  | 2nd dose | Comirnaty (Biontech)     | Comirnaty (Biontech) | 9/6/2021  | 115 | Hypertension                         | Ramipril, amlodipine, letrozole                  |     |
| C3.12  | 3 | 59  | Female | Negative | Negative | No | No  | No  | 2nd dose | Vaxzevria (Astra-Zeneca) | Comirnaty (Biontech) | 10/8/2021 | 53  | None                                 | None                                             |     |
| C3.13  | 3 | 27  | Female | Negative | Negative | No | No  | No  | 2nd dose | Comirnaty (Biontech)     | Comirnaty (Biontech) | 2/6/2021  | 122 | None                                 | None                                             |     |
| C3.14  | 3 | 18  | Female | Negative | Negative | No | No  | No  | 1st dose | Comirnaty (Biontech)     |                      | 29/9/2021 | 3   | None                                 | None                                             |     |
| C3.15  | 3 | 43  | Female | Negative | Negative | No | No  | No  | 2nd dose | Vaxzevria (Astra-Zeneca) | Comirnaty (Biontech) | 27/7/2021 | 67  | None                                 | None                                             |     |
| C3.16  | 3 | 56  | Female | Negative | Negative | No | No  | No  | 2nd dose | Comirnaty (Biontech)     | Comirnaty (Biontech) | 2/7/2021  | 92  | Hypothyroidism, hypercholesterolemia | Atorvastatin, L-thyroxine                        |     |
| C3.17  | 3 | 43  | Female | Negative | Negative | No | No  | No  | 2nd dose | Comirnaty (Biontech)     | Comirnaty (Biontech) | 23/9/2021 | 9   | Multiple sclerosis, Hashimoto        | L-thyroxine                                      |     |

|       |   |    |        |          |          |    |    |    |              |                          |                      |           |     |                         |                                     |
|-------|---|----|--------|----------|----------|----|----|----|--------------|--------------------------|----------------------|-----------|-----|-------------------------|-------------------------------------|
| C3.18 | 3 | 28 | Female | Negative | Negative | No | No | No | 2nd dose     | Comirnaty (Biontech)     | Comirnaty (Biontech) | 21/7/2021 | 73  | None                    | None                                |
| C3.19 | 3 | 18 | Female | Negative | Negative | No | No | No | 1st dose     | Comirnaty (Biontech)     |                      | 22/9/2021 | 10  | None                    | None                                |
| C3.20 | 3 | 28 | Male   | Negative | Negative | No | No | No | 2nd dose     | Comirnaty (Biontech)     | Comirnaty (Biontech) | 20/7/2021 | 74  | None                    | None                                |
| C3.21 | 3 | 30 | Male   | Negative | Negative | No | No | No | 2nd dose     | Comirnaty (Biontech)     | Comirnaty (Biontech) | 3/2/2021  | 241 | None                    | None                                |
| C3.22 | 3 | 26 | Male   | Negative | Negative | No | No | No | Unvaccinated |                          |                      |           |     | None                    | None                                |
| C3.23 | 3 | 25 | Female | Negative | Negative | No | No | No | Unvaccinated |                          |                      |           |     | Asthma                  | None                                |
| C3.24 | 3 | 43 | Female | Negative | Negative | No | No | No | 1st dose     | Comirnaty (Biontech)     |                      | 22/9/2021 | 10  | None                    | None                                |
| C3.25 | 3 | 20 | Male   | Negative | Negative | No | No | No | 2nd dose     | Comirnaty (Biontech)     | Comirnaty (Biontech) | 9/9/2021  | 23  | None                    | None                                |
| C3.26 | 3 | 25 | Female | Negative | Negative | No | No | No | 2nd dose     | Comirnaty (Biontech)     | Comirnaty (Biontech) | 21/7/2021 | 73  | None                    | None                                |
| C3.27 | 3 | 25 | Female | Negative | Negative | No | No | No | 2nd dose     | Comirnaty (Biontech)     | Comirnaty (Biontech) | 21/7/2021 | 73  | None                    | None                                |
| C3.28 | 3 | 48 | Male   | Negative | Negative | No | No | No | 2nd dose     | Comirnaty (Biontech)     | Comirnaty (Biontech) | 15/8/2021 | 48  | None                    | None                                |
| C3.29 | 3 | 53 | Male   | Negative | Negative | No | No | No | 2nd dose     | Comirnaty (Biontech)     | Comirnaty (Biontech) | 8/6/2021  | 116 | None                    | None                                |
| C3.30 | 3 | 48 | Male   | Negative | Negative | No | No | No | 2nd dose     | Comirnaty (Biontech)     | Comirnaty (Biontech) | 8/6/2021  | 116 | Hypertension            | Candesartan, amlodipine, paroxetine |
| C3.31 | 3 | 26 | Female | Negative | Negative | No | No | No | 2nd dose     | Vaxzevria (Astra-Zeneca) | Comirnaty (Biontech) | 18/5/2021 | 137 | None                    | None                                |
| C3.32 | 3 | 25 | Female | Negative | Negative | No | No | No | 2nd dose     | Covid-19 (Moderna)       | Covid-19 (Moderna)   | 19/7/2021 | 75  | None                    | None                                |
| C3.33 | 3 | 25 | Male   | Negative | Negative | No | No | No | 2nd dose     | Comirnaty (Biontech)     | Comirnaty (Biontech) | 25/6/2021 | 99  | None                    | None                                |
| C3.34 | 3 | 45 | Female | Negative | Negative | No | No | No | 2nd dose     | Vaxzevria (Astra-Zeneca) | Comirnaty (Biontech) | 12/5/2021 | 143 | None                    | None                                |
| C3.35 | 3 | 27 | Male   | Negative | Negative | No | No | No | 2nd dose     | Comirnaty (Biontech)     | Comirnaty (Biontech) | 29/7/2021 | 65  | None                    | None                                |
| C3.36 | 3 | 21 | Female | Negative | Negative | No | No | No | 2nd dose     | Comirnaty (Biontech)     | Comirnaty (Biontech) | 22/7/2021 | 72  | None                    | None                                |
| C3.37 | 3 | 50 | Female | Negative | Negative | No | No | No | Unvaccinated |                          |                      |           |     | Hypertension            | None                                |
| C3.38 | 3 | 37 | Female | Negative | Negative | No | No | No | 2nd dose     | Comirnaty (Biontech)     | Comirnaty (Biontech) | 30/6/2021 | 94  | None                    | None                                |
| C3.39 | 3 | 51 | Female | Negative | Negative | No | No | No | 2nd dose     | Covid-19 (Moderna)       | Covid-19 (Moderna)   | 29/7/2021 | 65  | Cardiovascular disorder | Apixaban                            |

|       |   |    |        |          |          |    |     |    |          |                          |                      |           |     |                         |                                   |
|-------|---|----|--------|----------|----------|----|-----|----|----------|--------------------------|----------------------|-----------|-----|-------------------------|-----------------------------------|
| C3.40 | 3 | 18 | Female | Negative | Negative | No | No  | No | 2nd dose | Comirnaty (Biontech)     | Comirnaty (Biontech) | 3/8/2021  | 60  | None                    | None                              |
| C3.41 | 3 | 23 | Male   | Negative | Negative | No | No  | No | 2nd dose | Comirnaty (Biontech)     | Comirnaty (Biontech) | 19/7/2021 | 75  | None                    | None                              |
| C3.42 | 3 | 24 | Male   | Negative | Negative | No | No  | No | 2nd dose | Comirnaty (Biontech)     | Comirnaty (Biontech) | 12/7/2021 | 82  | None                    | None                              |
| C3.43 | 3 | 46 | Female | Negative | Negative | No | No  | No | 1st dose | Johnson & Johnson        |                      | 17/6/2021 | 107 | None                    | None                              |
| C3.44 | 3 | 24 | Male   | Negative | Negative | No | No  | No | 2nd dose | Comirnaty (Biontech)     | Comirnaty (Biontech) | 22/7/2021 | 72  | None                    | None                              |
| C3.45 | 3 | 30 | Female | Negative | Negative | No | No  | No | 2nd dose | Comirnaty (Biontech)     | Comirnaty (Biontech) | 21/6/2021 | 103 | Hypertension            | Metoprolol                        |
| C3.46 | 3 | 20 | Male   | Negative | Negative | No | Yes | No | 1st dose | Comirnaty (Biontech)     |                      | 30/6/2021 | 94  | None                    | None                              |
| C3.47 | 3 | 43 | Male   | Negative | Negative | No | No  | No | 2nd dose | Comirnaty (Biontech)     | Comirnaty (Biontech) | 30/7/2021 | 64  | Hypertension            | Amlodipine, ramipril              |
| C3.48 | 3 | 37 | Male   | Negative | Negative | No | No  | No | 2nd dose | Covid-19 (Moderna)       | Covid-19 (Moderna)   | 29/6/2021 | 95  | Hypertension            | Ramipril                          |
| C3.49 | 3 | 48 | Female | Negative | Negative | No | No  | No | 2nd dose | Comirnaty (Biontech)     | Comirnaty (Biontech) | 22/5/2021 | 133 | Thyroid disorder        | L-thyroxine                       |
| C3.50 | 3 | 44 | Female | Negative | Negative | No | No  | No | 2nd dose | Vaxzevria (Astra-Zeneca) | Comirnaty (Biontech) | 23/5/2021 | 132 | None                    | None                              |
| C3.51 | 3 | 39 | Male   | Negative | Negative | No | No  | No | 2nd dose | Comirnaty (Biontech)     | Comirnaty (Biontech) | 27/5/2021 | 128 | None                    | None                              |
| C3.52 | 3 | 33 | Female | Negative | Negative | No | No  | No | 2nd dose | Comirnaty (Biontech)     | Comirnaty (Biontech) | 13/7/2021 | 81  | None                    | None                              |
| C3.53 | 3 | 43 | Male   | Negative | Negative | No | No  | No | 2nd dose | Comirnaty (Biontech)     | Comirnaty (Biontech) | 17/6/2021 | 107 | Cardiovascular disorder | Apixaban                          |
| C3.54 | 3 | 45 | Male   | Negative | Negative | No | No  | No | 2nd dose | Covid-19 (Moderna)       | Covid-19 (Moderna)   | 18/5/2021 | 137 | Asthma                  | Salbutamol, formoterol+budesonide |
| C3.55 | 3 | 25 | Female | Negative | Negative | No | No  | No | 2nd dose | Comirnaty (Biontech)     | Comirnaty (Biontech) | 22/6/2021 | 102 | None                    | None                              |
| C3.56 | 3 | 26 | Female | Negative | Negative | No | No  | No | 2nd dose | Comirnaty (Biontech)     | Comirnaty (Biontech) | 23/6/2021 | 101 | None                    | None                              |
| C3.57 | 3 | 56 | Male   | Negative | Negative | No | No  | No | 2nd dose | Comirnaty (Biontech)     | Comirnaty (Biontech) | 9/6/2021  | 115 | COPD                    | Fluticasone, vilanterol           |
| C3.58 | 3 | 39 | Male   | Negative | Negative | No | No  | No | 2nd dose | Comirnaty (Biontech)     | Comirnaty (Biontech) | 28/6/2021 | 96  | None                    | None                              |
| C3.59 | 3 | 20 | Female | Negative | Negative | No | No  | No | 2nd dose | Johnson & Johnson        | Other vaccine        | 3/9/2021  | 29  | N/A                     | Methylphenidat                    |
| C3.60 | 3 | 41 | Male   | Negative | Negative | No | No  | No | 2nd dose | Vaxzevria (Astra-Zeneca) | Comirnaty (Biontech) | 20/4/2021 | 165 | None                    | None                              |

|       |   |    |        |          |          |    |        |    |              |                          |                      |           |     |                                     |             |
|-------|---|----|--------|----------|----------|----|--------|----|--------------|--------------------------|----------------------|-----------|-----|-------------------------------------|-------------|
| C3.61 | 3 | 44 | Female | Negative | Negative | No | No     | No | 2nd dose     | Comirnaty (Biontech)     | Comirnaty (Biontech) | 12/2/2021 | 232 | Thyroid disorder                    | L-thyroxine |
| C3.62 | 3 | 24 | Male   | Negative | Negative | No | Yes    | No | 1st dose     | Comirnaty (Biontech)     |                      | 4/8/2021  | 59  | None                                | None        |
| C3.63 | 3 | 19 | Male   | Negative | Negative | No | No     | No | 2nd dose     | Comirnaty (Biontech)     | Comirnaty (Biontech) | 16/6/2021 | 108 | None                                | None        |
| C3.64 | 3 | 21 | Female | Negative | Negative | No | No     | No | 2nd dose     | Covid-19 (Moderna)       | Covid-19 (Moderna)   | 25/7/2021 | 69  | None                                | None        |
| C3.65 | 3 | 27 | Male   | Negative | Negative | No | Unsure | No | 2nd dose     | Comirnaty (Biontech)     | Comirnaty (Biontech) | 23/5/2021 | 132 | Diabetes type 1                     | Insulin     |
| C3.66 | 3 | 37 | Male   | Negative | Negative | No | No     | No | 2nd dose     | Comirnaty (Biontech)     | Comirnaty (Biontech) | 22/5/2021 | 133 | None                                | None        |
| C3.67 | 3 | 32 | Male   | Negative | Negative | No | No     | No | 2nd dose     | Comirnaty (Biontech)     | Comirnaty (Biontech) | 28/5/2021 | 127 | None                                | None        |
| C3.68 | 3 | 28 | Female | Negative | Negative | No | No     | No | 2nd dose     | Comirnaty (Biontech)     | Comirnaty (Biontech) | 9/6/2021  | 115 | None                                | None        |
| C3.69 | 3 | 31 | Female | Negative | Negative | No | No     | No | 2nd dose     | Covid-19 (Moderna)       | Covid-19 (Moderna)   | 30/7/2021 | 64  | None                                | None        |
| C3.70 | 3 | 40 | Female | Negative | Negative | No | No     | No | 2nd dose     | Comirnaty (Biontech)     | Comirnaty (Biontech) | 21/6/2021 | 103 | None                                | None        |
| C3.71 | 3 | 26 | Female | Negative | Negative | No | No     | No | 2nd dose     | Comirnaty (Biontech)     | Comirnaty (Biontech) | 7/7/2021  | 87  | None                                | None        |
| C3.72 | 3 | 38 | Female | Negative | Negative | No | No     | No | 2nd dose     | Covid-19 (Moderna)       | Covid-19 (Moderna)   | 11/6/2021 | 113 | None                                | None        |
| C3.73 | 3 | 36 | Male   | Negative | Negative | No | No     | No | 2nd dose     | Comirnaty (Biontech)     | Comirnaty (Biontech) | 18/6/2021 | 106 | None                                | None        |
| C3.74 | 3 | 54 | Female | Negative | Negative | No | No     | No | 2nd dose     | Comirnaty (Biontech)     | Comirnaty (Biontech) | 12/6/2021 | 112 | None                                | None        |
| C3.75 | 3 | 62 | Male   | Negative | Negative | No | No     | No | Unvaccinated |                          |                      |           |     | None                                | None        |
| C3.76 | 3 | 26 | Male   | Negative | Negative | No | No     | No | 2nd dose     | Comirnaty (Biontech)     | Comirnaty (Biontech) | N/A       | N/A | None                                | None        |
| C3.77 | 3 | 27 | Male   | Negative | Negative | No | Yes    | No | 1st dose     | Covid-19 (Moderna)       |                      | 29/5/2021 | 126 | None                                | None        |
| C3.78 | 3 | 29 | Male   | Negative | Negative | No | No     | No | 2nd dose     | Comirnaty (Biontech)     | Comirnaty (Biontech) | 23/6/2021 | 101 | None                                | None        |
| C3.79 | 3 | 33 | Female | Negative | Negative | No | No     | No | 2nd dose     | Vaxzevria (Astra-Zeneca) | Comirnaty (Biontech) | 5/5/2021  | 150 | None                                | None        |
| C3.80 | 3 | 44 | Female | Negative | Negative | No | No     | No | 2nd dose     | Comirnaty (Biontech)     | Comirnaty (Biontech) | 14/8/2021 | 49  | None                                | None        |
| C3.81 | 3 | 58 | Female | Negative | Negative | No | No     | No | 2nd dose     | Comirnaty (Biontech)     | Comirnaty (Biontech) | 2/7/2021  | 92  | Hypothyroidism, chronic thyroiditis | L-thyroxine |
| C3.82 | 3 | 32 | Male   | Negative | Negative | No | No     | No | 2nd dose     | Comirnaty (Biontech)     | Comirnaty (Biontech) | 29/5/2021 | 126 | None                                | None        |



|        |   |    |        |          |          |    |     |    |              |                          |                      |           |     |                                                              |                                                |
|--------|---|----|--------|----------|----------|----|-----|----|--------------|--------------------------|----------------------|-----------|-----|--------------------------------------------------------------|------------------------------------------------|
| C3.83  | 3 | 20 | Female | Negative | Negative | No | No  | No | 2nd dose     | Comirnaty (Biontech)     | Comirnaty (Biontech) | 20/5/2021 | 135 | None                                                         | None                                           |
| C3.84  | 3 | 58 | Female | Negative | Negative | No | No  | No | 2nd dose     | Vaxzevria (Astra-Zeneca) | Covid-19 (Moderna)   | 20/6/2021 | 104 | Hypothyroidism                                               | L-thyroxine                                    |
| C3.85  | 3 | 32 | Female | Negative | Negative | No | No  | No | 2nd dose     | Covid-19 (Moderna)       | Covid-19 (Moderna)   | 25/7/2021 | 69  | None                                                         | None                                           |
| C3.86  | 3 | 44 | Female | Negative | Negative | No | Yes | No | 2nd dose     | Covid-19 (Moderna)       | Covid-19 (Moderna)   | 19/8/2021 | 44  | None                                                         | None                                           |
| C3.87  | 3 | 31 | Female | Negative | Negative | No | No  | No | 2nd dose     | Comirnaty (Biontech)     | Comirnaty (Biontech) | 22/7/2021 | 72  | None                                                         | None                                           |
| C3.88  | 3 | 28 | Male   | Negative | Negative | No | No  | No | 2nd dose     | Comirnaty (Biontech)     | Comirnaty (Biontech) | 5/8/2021  | 58  | None                                                         | None                                           |
| C3.89  | 3 | 43 | Male   | Negative | Negative | No | No  | No | 2nd dose     | Vaxzevria (Astra-Zeneca) | Comirnaty (Biontech) | 28/7/2021 | 66  | None                                                         | None                                           |
| C3.90  | 3 | 26 | Female | Negative | Negative | No | No  | No | 2nd dose     | Comirnaty (Biontech)     | Comirnaty (Biontech) | 22/6/2021 | 102 | None                                                         | None                                           |
| C3.91  | 3 | 21 | Female | Negative | Negative | No | No  | No | 2nd dose     | Comirnaty (Biontech)     | Comirnaty (Biontech) | 30/7/2021 | 64  | None                                                         | None                                           |
| C3.92  | 3 | 35 | Female | Negative | Negative | No | No  | No | 2nd dose     | Comirnaty (Biontech)     | Comirnaty (Biontech) | 2/7/2021  | 92  | Hypothyroidism                                               | L-thyroxine                                    |
| C3.93  | 3 | 47 | Female | Negative | Negative | No | No  | No | 2nd dose     | Comirnaty (Biontech)     | Comirnaty (Biontech) | 19/6/2021 | 105 | None                                                         | None                                           |
| C3.94  | 3 | 24 | Female | Negative | Negative | No | Yes | No | 1st dose     | Covid-19 (Moderna)       |                      | 29/5/2021 | 126 | None                                                         | None                                           |
| C3.95  | 3 | 41 | Female | Negative | Negative | No | No  | No | 2nd dose     | Comirnaty (Biontech)     | Comirnaty (Biontech) | 9/6/2021  | 115 | Asthma                                                       | Budesonide                                     |
| C3.96  | 3 | 53 | Male   | Negative | Negative | No | No  | No | 2nd dose     | Comirnaty (Biontech)     | Comirnaty (Biontech) | 11/8/2021 | 52  | None                                                         | None                                           |
| C3.97  | 3 | 44 | Female | Negative | Negative | No | No  | No | 2nd dose     | Vaxzevria (Astra-Zeneca) | Comirnaty (Biontech) | 14/7/2021 | 80  | None                                                         | None                                           |
| C3.98  | 3 | 52 | Female | Negative | Negative | No | No  | No | 2nd dose     | Comirnaty (Biontech)     | Comirnaty (Biontech) | 19/5/2021 | 136 | Diabetes type 2, hypertension, rheumatism, tracheal stenosis | Metformin, semaglutide, bisoprolol, infliximab |
| C3.99  | 3 | 51 | Female | Negative | Negative | No | No  | No | 2nd dose     | Comirnaty (Biontech)     | Comirnaty (Biontech) | 25/2/2021 | 219 | None                                                         | None                                           |
| C3.100 | 3 | 26 | Male   | Negative | Negative | No | No  | No | 2nd dose     | Comirnaty (Biontech)     | Comirnaty (Biontech) | 30/6/2021 | 94  | Hypothyroidism                                               | L-thyroxine                                    |
| C3.101 | 3 | 46 | Male   | Negative | Negative | No | No  | No | 2nd dose     | Comirnaty (Biontech)     | Comirnaty (Biontech) | 23/7/2021 | 71  | None                                                         | None                                           |
| C3.102 | 3 | 47 | Male   | Negative | Negative | No | No  | No | Unvaccinated |                          |                      |           |     | None                                                         | None                                           |

|        |   |    |        |          |          |    |    |    |              |                          |                      |           |     |              |                   |
|--------|---|----|--------|----------|----------|----|----|----|--------------|--------------------------|----------------------|-----------|-----|--------------|-------------------|
| C3.103 | 3 | 49 | Male   | Negative | Negative | No | No | No | 2nd dose     | Comirnaty (Biontech)     | Comirnaty (Biontech) | 9/7/2021  | 85  | None         | None              |
| C3.104 | 3 | 45 | Female | Negative | Negative | No | No | No | 2nd dose     | Covid-19 (Moderna)       | Covid-19 (Moderna)   | 9/8/2021  | 54  | Hypertension | Candesartan       |
| C3.105 | 3 | 25 | Female | Negative | Negative | No | No | No | 2nd dose     | Comirnaty (Biontech)     | Comirnaty (Biontech) | 30/7/2021 | 64  | None         | None              |
| C3.106 | 3 | 23 | Female | Negative | Negative | No | No | No | 2nd dose     | Vaxzevria (Astra-Zeneca) | Comirnaty (Biontech) | 6/6/2021  | 118 | None         | None              |
| C3.107 | 3 | 60 | Female | Negative | Negative | No | No | No | 2nd dose     | Comirnaty (Biontech)     | Comirnaty (Biontech) | 16/5/2021 | 139 | Hypertension | Valsartan         |
| C3.108 | 3 | 48 | Male   | Negative | Negative | No | No | No | 2nd dose     | Comirnaty (Biontech)     | Comirnaty (Biontech) | 19/6/2021 | 105 | Hypertension | Antihypertensives |
| C3.109 | 3 | 39 | Female | Negative | Negative | No | No | No | 2nd dose     | Vaxzevria (Astra-Zeneca) | Comirnaty (Biontech) | 7/7/2021  | 87  | None         | None              |
| C3.110 | 3 | 27 | Female | Negative | Negative | No | No | No | 2nd dose     | Comirnaty (Biontech)     | Comirnaty (Biontech) | N/A       | N/A | None         | None              |
| C3.111 | 3 | 50 | Female | Negative | Negative | No | No | No | 2nd dose     | Comirnaty (Biontech)     | Comirnaty (Biontech) | 25/2/2021 | 219 | None         | None              |
| C3.112 | 3 | 46 | Male   | Negative | Negative | No | No | No | 2nd dose     | Covid-19 (Moderna)       | Covid-19 (Moderna)   | 25/5/2021 | 130 | None         | None              |
| C3.113 | 3 | 34 | Female | Negative | Negative | No | No | No | Unvaccinated |                          |                      |           |     | None         | None              |
| C3.114 | 3 | 28 | Male   | Negative | Negative | No | No | No | 2nd dose     | Covid-19 (Moderna)       | Covid-19 (Moderna)   | 25/7/2021 | 69  | None         | None              |
| C3.115 | 3 | 50 | Male   | Negative | Negative | No | No | No | 2nd dose     | Comirnaty (Biontech)     | Comirnaty (Biontech) | 12/8/2021 | 51  | None         | None              |
| C3.116 | 3 | 27 | Female | Negative | Negative | No | No | No | 2nd dose     | Comirnaty (Biontech)     | Comirnaty (Biontech) | 5/8/2021  | 58  | None         | None              |
| C3.117 | 3 | 29 | Female | Negative | Negative | No | No | No | 2nd dose     | Comirnaty (Biontech)     | Comirnaty (Biontech) | 27/7/2021 | 67  | None         | None              |
| C3.118 | 3 | 36 | Female | Negative | Negative | No | No | No | 2nd dose     | Comirnaty (Biontech)     | Comirnaty (Biontech) | 6/8/2021  | 57  | None         | None              |
| C3.119 | 3 | 38 | Female | Negative | Negative | No | No | No | 2nd dose     | Covid-19 (Moderna)       | Covid-19 (Moderna)   | 18/5/2021 | 137 | None         | None              |
| C3.120 | 3 | 36 | Male   | Negative | Negative | No | No | No | 2nd dose     | Comirnaty (Biontech)     | Comirnaty (Biontech) | 18/6/2021 | 106 | None         | None              |
| C3.121 | 3 | 62 | Male   | Negative | Negative | No | No | No | 2nd dose     | Comirnaty (Biontech)     | Comirnaty (Biontech) | 5/6/2021  | 119 | None         | None              |
| C3.122 | 3 | 50 | Male   | Negative | Negative | No | No | No | 2nd dose     | Vaxzevria (Astra-Zeneca) | Covid-19 (Moderna)   | 2/7/2021  | 92  | Hypertension | None              |
| C3.123 | 3 | 54 | Male   | Negative | Negative | No | No | No | 2nd dose     | Comirnaty (Biontech)     | Comirnaty (Biontech) | 6/8/2021  | 57  | None         | None              |

|        |   |    |        |          |          |    |    |    |              |                          |                      |           |     |                           |                        |
|--------|---|----|--------|----------|----------|----|----|----|--------------|--------------------------|----------------------|-----------|-----|---------------------------|------------------------|
| C3.124 | 3 | 45 | Female | Negative | Negative | No | No | No | 2nd dose     | Comirnaty (Biontech)     | Comirnaty (Biontech) | 18/6/2021 | 106 | None                      | None                   |
| C3.125 | 3 | 30 | Male   | Negative | Negative | No | No | No | 1st dose     | Johnson & Johnson        |                      | 20/8/2021 | 43  | None                      | None                   |
| C3.126 | 3 | 40 | Female | Negative | Negative | No | No | No | 2nd dose     | Comirnaty (Biontech)     | Comirnaty (Biontech) | N/A       | N/A | None                      | None                   |
| C3.127 | 3 | 47 | Male   | Negative | Negative | No | No | No | 1st dose     | Johnson & Johnson        |                      | 4/6/2021  | 120 | Gastrointestinal disorder | Omeprazole             |
| C3.128 | 3 | 52 | Male   | Negative | Negative | No | No | No | 2nd dose     | Vaxzevria (Astra-Zeneca) | Comirnaty (Biontech) | 14/7/2021 | 80  | None                      | None                   |
| C3.129 | 3 | 44 | Male   | Negative | Negative | No | No | No | 2nd dose     | Vaxzevria (Astra-Zeneca) | Comirnaty (Biontech) | 8/7/2021  | 86  | None                      | None                   |
| C3.130 | 3 | 44 | Female | Negative | Negative | No | No | No | Unvaccinated |                          |                      |           |     | None                      | None                   |
| C3.131 | 3 | 25 | Female | Negative | Negative | No | No | No | 2nd dose     | Comirnaty (Biontech)     | Comirnaty (Biontech) | 12/7/2021 | 82  | Thyroid disorder          | L-thyroxine            |
| C3.132 | 3 | 22 | Female | Negative | Negative | No | No | No | 2nd dose     | Vaxzevria (Astra-Zeneca) | Comirnaty (Biontech) | 17/6/2021 | 107 | None                      | None                   |
| C3.133 | 3 | 32 | Female | Negative | Negative | No | No | No | 2nd dose     | Comirnaty (Biontech)     | Comirnaty (Biontech) | 21/7/2021 | 73  | None                      | None                   |
| C3.134 | 3 | 50 | Female | Negative | Negative | No | No | No | 2nd dose     | Comirnaty (Biontech)     | Comirnaty (Biontech) | 20/8/2021 | 43  | None                      | None                   |
| C3.135 | 3 | 27 | Female | Negative | Negative | No | No | No | 1st dose     | Johnson & Johnson        |                      | 28/5/2021 | 127 | None                      | None                   |
| C3.136 | 3 | 26 | Male   | Negative | Negative | No | No | No | 2nd dose     | Vaxzevria (Astra-Zeneca) | Comirnaty (Biontech) | N/A       | N/A | None                      | None                   |
| C3.137 | 3 | 59 | Female | Negative | Negative | No | No | No | 2nd dose     | Comirnaty (Biontech)     | Comirnaty (Biontech) | 7/6/2021  | 117 | Asthma                    | Salmeterol+fluticasone |
| C3.138 | 3 | 52 | Male   | Negative | Negative | No | No | No | 2nd dose     | Comirnaty (Biontech)     | Comirnaty (Biontech) | 1/8/2021  | 62  | Hypertension              | Ramipril               |
| C3.139 | 3 | 47 | Female | Negative | Negative | No | No | No | 2nd dose     | Comirnaty (Biontech)     | Comirnaty (Biontech) | 3/8/2021  | 60  | Hypertension              | Nebivolol              |
| C3.140 | 3 | 44 | Female | Negative | Negative | No | No | No | 2nd dose     | Covid-19 (Moderna)       | Covid-19 (Moderna)   | 25/5/2021 | 130 | None                      | None                   |
| C3.141 | 3 | 26 | Male   | Negative | Negative | No | No | No | 1st dose     | Johnson & Johnson        |                      | 15/6/2021 | 109 | None                      | None                   |
| C3.142 | 3 | 40 | Female | Negative | Negative | No | No | No | 2nd dose     | Comirnaty (Biontech)     | Comirnaty (Biontech) | 8/6/2021  | 116 | None                      | None                   |
| C3.143 | 3 | 60 | Female | Negative | Negative | No | No | No | 2nd dose     | Comirnaty (Biontech)     | Comirnaty (Biontech) | 27/5/2021 | 128 | Hypertension              | Metoprolol             |
| C3.144 | 3 | 54 | Female | Negative | Negative | No | No | No | 2nd dose     | Comirnaty (Biontech)     | Comirnaty (Biontech) | 16/6/2021 | 108 | None                      | None                   |

|        |   |    |        |          |          |    |     |    |              |                          |                          |           |     |                  |             |
|--------|---|----|--------|----------|----------|----|-----|----|--------------|--------------------------|--------------------------|-----------|-----|------------------|-------------|
| C3.145 | 3 | 24 | Female | Negative | Negative | No | No  | No | 2nd dose     | Comirnaty (Biontech)     | Comirnaty (Biontech)     | 8/6/2021  | 116 | Thyroid disorder | L-thyroxine |
| C3.146 | 3 | 44 | Female | Negative | Negative | No | No  | No | 2nd dose     | Comirnaty (Biontech)     | Comirnaty (Biontech)     | 3/6/2021  | 121 | None             | None        |
| C3.147 | 3 | 49 | Female | Negative | Negative | No | No  | No | 2nd dose     | Comirnaty (Biontech)     | Comirnaty (Biontech)     | 1/7/2021  | 93  | None             | None        |
| C3.148 | 3 | 21 | Female | Negative | Negative | No | No  | No | 2nd dose     | Comirnaty (Biontech)     | Comirnaty (Biontech)     | 3/2/2021  | 241 | None             | None        |
| C3.149 | 3 | 24 | Female | Negative | Negative | No | No  | No | 2nd dose     | Comirnaty (Biontech)     | Comirnaty (Biontech)     | 22/6/2021 | 102 | None             | None        |
| C3.150 | 3 | 28 | Male   | Negative | Negative | No | No  | No | 2nd dose     | Comirnaty (Biontech)     | Comirnaty (Biontech)     | 21/6/2021 | 103 | None             | None        |
| C3.151 | 3 | 26 | Female | Negative | Negative | No | Yes | No | 1st dose     | Johnson & Johnson        |                          | 10/6/2021 | 114 | None             | None        |
| C3.152 | 3 | 47 | Female | Negative | Negative | No | No  | No | 2nd dose     | Comirnaty (Biontech)     | Comirnaty (Biontech)     | 16/7/2021 | 78  | Thyroid disorder | L-thyroxine |
| C3.153 | 3 | 32 | Female | Negative | Negative | No | No  | No | 2nd dose     | Comirnaty (Biontech)     | Comirnaty (Biontech)     | 9/6/2021  | 115 | None             | None        |
| C3.154 | 3 | 49 | Female | Negative | Negative | No | No  | No | 2nd dose     | Covid-19 (Moderna)       | Covid-19 (Moderna)       | 29/6/2021 | 95  | None             | None        |
| C3.155 | 3 | 21 | Male   | Negative | Negative | No | No  | No | 2nd dose     | Comirnaty (Biontech)     | Comirnaty (Biontech)     | 23/6/2021 | 101 | None             | None        |
| C3.156 | 3 | 49 | Male   | Negative | Negative | No | No  | No | 2nd dose     | Vaxzevria (Astra-Zeneca) | Comirnaty (Biontech)     | 16/7/2021 | 78  | None             | None        |
| C3.157 | 3 | 27 | Female | Negative | Negative | No | No  | No | 2nd dose     | Comirnaty (Biontech)     | Comirnaty (Biontech)     | 17/7/2021 | 77  | None             | None        |
| C3.158 | 3 | 47 | Female | Negative | Negative | No | No  | No | Unvaccinated |                          |                          |           |     | None             | None        |
| C3.159 | 3 | 34 | Female | Negative | Negative | No | No  | No | 2nd dose     | Comirnaty (Biontech)     | Comirnaty (Biontech)     | 16/6/2021 | 108 | None             | None        |
| C3.160 | 3 | 39 | Female | Negative | Negative | No | No  | No | 2nd dose     | Comirnaty (Biontech)     | Comirnaty (Biontech)     | 15/7/2021 | 79  | None             | None        |
| C3.161 | 3 | 30 | Male   | Negative | Negative | No | No  | No | 1st dose     | Johnson & Johnson        |                          | 11/9/2021 | 21  | None             | None        |
| C3.162 | 3 | 39 | Male   | Negative | Negative | No | No  | No | 2nd dose     | Vaxzevria (Astra-Zeneca) | Vaxzevria (Astra-Zeneca) | 22/6/2021 | 102 | None             | None        |
| C3.163 | 3 | 37 | Female | Negative | Negative | No | No  | No | 2nd dose     | Vaxzevria (Astra-Zeneca) | Vaxzevria (Astra-Zeneca) | 6/5/2021  | 149 | None             | None        |
| C3.164 | 3 | 51 | Female | Negative | Negative | No | No  | No | 2nd dose     | Comirnaty (Biontech)     | Comirnaty (Biontech)     | 16/6/2021 | 108 | None             | None        |
| C3.165 | 3 | 28 | Male   | Negative | Negative | No | No  | No | 2nd dose     | Comirnaty (Biontech)     | Comirnaty (Biontech)     | 18/9/2021 | 14  | None             | None        |

|        |   |     |        |          |          |    |    |    |              |                      |                      |            |     |                 |                          |
|--------|---|-----|--------|----------|----------|----|----|----|--------------|----------------------|----------------------|------------|-----|-----------------|--------------------------|
| C3.166 | 3 | 25  | Male   | Negative | Negative | No | No | No | 1st dose     | Johnson & Johnson    |                      | 17/6/2021  | 107 | None            | None                     |
| C3.167 | 3 | 24  | Male   | Negative | Negative | No | No | No | 1st dose     | Johnson & Johnson    |                      | N/A        | N/A | Rheumatism      | Methotrexat, secukinumab |
| C3.168 | 3 | 25  | Female | Negative | Negative | No | No | No | 2nd dose     | Comirnaty (Biontech) | Comirnaty (Biontech) | 10/5/2021  | 145 | Diabetes type 1 | Insulin                  |
| C3.169 | 3 | 28  | Female | Negative | Negative | No | No | No | 2nd dose     | Covid-19 (Moderna)   | Covid-19 (Moderna)   | 4/7/2021   | 90  | None            | None                     |
| C3.170 | 3 | 24  | Male   | Negative | Negative | No | No | No | 2nd dose     | Comirnaty (Biontech) | Comirnaty (Biontech) | 26/6/2021  | 98  | None            | None                     |
| C3.171 | 3 | 40  | Female | Negative | Negative | No | No | No | 2nd dose     | Comirnaty (Biontech) | Comirnaty (Biontech) | 2/6/2021   | 122 | None            | None                     |
| C3.172 | 3 | 25  | Male   | Negative | Negative | No | No | No | 1st dose     | Johnson & Johnson    |                      | 10/06/2021 | 114 | Allergy         | None                     |
| C3.173 | 3 | 36  | Female | Negative | Negative | No | No | No | 2nd dose     | Covid-19 (Moderna)   | Covid-19 (Moderna)   | 1/5/2021   | 154 | None            | None                     |
| C3.174 | 3 | 34  | Male   | Negative | Negative | No | No | No | 2nd dose     | Comirnaty (Biontech) | Comirnaty (Biontech) | 11/6/2021  | 113 | None            | None                     |
| C3.175 | 3 | 19  | Female | Negative | Negative | No | No | No | 2nd dose     | Comirnaty (Biontech) | Comirnaty (Biontech) | 15/7/2021  | 79  | None            | None                     |
| C3.176 | 3 | 27  | Female | Negative | Negative | No | No | No | 2nd dose     | Comirnaty (Biontech) | Comirnaty (Biontech) | 11/6/2021  | 113 | None            | None                     |
| C3.177 | 3 | 23  | Male   | Negative | Negative | No | No | No | 2nd dose     | Comirnaty (Biontech) | Comirnaty (Biontech) | 28/5/2021  | 127 | None            | None                     |
| C3.178 | 3 | 33  | Female | Negative | Negative | No | No | No | 2nd dose     | Comirnaty (Biontech) | Comirnaty (Biontech) | N/A        | N/A | None            | None                     |
| C3.179 | 3 | 24  | Female | Negative | Negative | No | No | No | 2nd dose     | Comirnaty (Biontech) | Comirnaty (Biontech) | 30/7/2021  | 64  | None            | None                     |
| C3.180 | 3 | 25  | Male   | Negative | Negative | No | No | No | 2nd dose     | Comirnaty (Biontech) | Comirnaty (Biontech) | 10/6/2021  | 114 | None            | None                     |
| C3.181 | 3 | 24  | Female | Negative | Negative | No | No | No | 2nd dose     | Comirnaty (Biontech) | Comirnaty (Biontech) | 8/7/2021   | 86  | None            | None                     |
| C3.182 | 3 | 30  | Male   | Negative | Negative | No | No | No | 2nd dose     | Comirnaty (Biontech) | Comirnaty (Biontech) | N/A        | N/A | None            | None                     |
| C3.183 | 3 | N/A | Female | Negative | Negative | No | No | No | 2nd dose     | Comirnaty (Biontech) | Comirnaty (Biontech) | 16/6/2021  | 108 | None            | None                     |
| C3.184 | 3 | 26  | Female | Negative | Negative | No | No | No | 2nd dose     | Comirnaty (Biontech) | Comirnaty (Biontech) | 21/6/2021  | 103 | None            | None                     |
| C3.185 | 3 | 19  | Male   | Negative | Negative | No | No | No | Unvaccinated |                      |                      |            |     | None            | None                     |
| C3.186 | 3 | 23  | Male   | Negative | Negative | No | No | No | 2nd dose     | Comirnaty (Biontech) | Comirnaty (Biontech) | 17/6/2021  | 107 | None            | None                     |
| C3.187 | 3 | 18  | Female | Negative | Negative | No | No | No | 2nd dose     | Comirnaty (Biontech) | Comirnaty (Biontech) | 7/7/2021   | 87  | None            | None                     |
| C3.188 | 3 | 30  | Female | Negative | Negative | No | No | No | 2nd dose     | Comirnaty (Biontech) | Comirnaty (Biontech) | 29/6/2021  | 95  | None            | None                     |

|        |   |    |        |          |          |    |        |    |              |                          |                      |           |     |                      |                       |
|--------|---|----|--------|----------|----------|----|--------|----|--------------|--------------------------|----------------------|-----------|-----|----------------------|-----------------------|
| C3.189 | 3 | 32 | Female | Negative | Negative | No | No     | No | 2nd dose     | Vaxzevria (Astra-Zeneca) | Comirnaty (Biontech) | 7/7/2021  | 87  | None                 | None                  |
| C3.190 | 3 | 31 | Male   | Negative | Negative | No | No     | No | 2nd dose     | Comirnaty (Biontech)     | Comirnaty (Biontech) | 19/7/2021 | 75  | None                 | None                  |
| C3.191 | 3 | 26 | Female | Negative | Negative | No | No     | No | 1st dose     | Comirnaty (Biontech)     |                      | 17/9/2021 | 15  | None                 | None                  |
| C3.192 | 3 | 29 | Female | Negative | Negative | No | No     | No | 2nd dose     | Comirnaty (Biontech)     | Comirnaty (Biontech) | 25/6/2021 | 99  | Respiratory disorder | Formoterol+budesonide |
| C3.193 | 3 | 33 | Female | Negative | Negative | No | No     | No | 2nd dose     | Comirnaty (Biontech)     | Comirnaty (Biontech) | 22/6/2021 | 102 | None                 | None                  |
| C3.194 | 3 | 22 | Male   | Negative | Negative | No | No     | No | 2nd dose     | Covid-19 (Moderna)       | Covid-19 (Moderna)   | 8/4/2021  | 177 | None                 | None                  |
| C3.195 | 3 | 31 | Male   | Negative | Negative | No | Unsure | No | Unvaccinated |                          |                      |           |     | None                 | None                  |
| C3.196 | 3 | 40 | Female | Negative | Negative | No | Unsure | No | Unvaccinated |                          |                      |           |     | None                 | None                  |
| C3.197 | 3 | 25 | Female | Negative | Negative | No | No     | No | 2nd dose     | Covid-19 (Moderna)       | Covid-19 (Moderna)   | 13/6/2021 | 111 | None                 | None                  |
| C3.198 | 3 | 20 | Male   | Negative | Negative | No | No     | No | 1st dose     | Johnson & Johnson        |                      | 26/6/2021 | 98  | None                 | None                  |
| C3.199 | 3 | 27 | Male   | Negative | Negative | No | No     | No | 2nd dose     | Covid-19 (Moderna)       | Covid-19 (Moderna)   | 13/6/2021 | 111 | None                 | None                  |
| C3.200 | 3 | 27 | Male   | Negative | Negative | No | No     | No | 2nd dose     | Vaxzevria (Astra-Zeneca) | Comirnaty (Biontech) | 26/7/2021 | 68  | None                 | None                  |
| C3.201 | 3 | 31 | Male   | Negative | Negative | No | No     | No | 2nd dose     | Comirnaty (Biontech)     | Comirnaty (Biontech) | 21/7/2021 | 73  | None                 | None                  |
| C3.202 | 3 | 44 | Male   | Negative | Negative | No | No     | No | 2nd dose     | Comirnaty (Biontech)     | Comirnaty (Biontech) | 14/6/2021 | 110 | None                 | None                  |
| C3.203 | 3 | 26 | Female | Negative | Negative | No | No     | No | Unvaccinated |                          |                      |           |     | None                 | None                  |
| C3.204 | 3 | 57 | Male   | Negative | Negative | No | No     | No | 2nd dose     | Comirnaty (Biontech)     | Comirnaty (Biontech) | 23/6/2021 | 101 | Thyroid disorder     | L-thyroxine           |
| C3.205 | 3 | 55 | Female | Negative | Negative | No | No     | No | 2nd dose     | Comirnaty (Biontech)     | Comirnaty (Biontech) | 14/7/2021 | 80  | None                 | None                  |
| C3.206 | 3 | 21 | Female | Negative | Negative | No | No     | No | 2nd dose     | Comirnaty (Biontech)     | Comirnaty (Biontech) | 3/8/2021  | 60  | None                 | None                  |
| C3.207 | 3 | 22 | Female | Negative | Negative | No | No     | No | 2nd dose     | Vaxzevria (Astra-Zeneca) | Comirnaty (Biontech) | 9/7/2021  | 85  | None                 | None                  |
| C3.208 | 3 | 31 | Male   | Negative | Negative | No | No     | No | 1st dose     | Johnson & Johnson        |                      | 27/5/2021 | 128 | None                 | None                  |
| C3.209 | 3 | 23 | Female | Negative | Negative | No | No     | No | 2nd dose     | Comirnaty (Biontech)     | Comirnaty (Biontech) | 27/5/2021 | 128 | None                 | None                  |
| C3.210 | 3 | 24 | Male   | Negative | Negative | No | No     | No | 2nd dose     | Comirnaty (Biontech)     | Comirnaty (Biontech) | 10/6/2021 | 114 | None                 | None                  |

|        |   |    |        |          |          |    |        |    |              |                          |                      |           |     |                                         |                           |
|--------|---|----|--------|----------|----------|----|--------|----|--------------|--------------------------|----------------------|-----------|-----|-----------------------------------------|---------------------------|
| C3.211 | 3 | 28 | Male   | Negative | Negative | No | No     | No | 2nd dose     | Comirnaty (Biontech)     | Comirnaty (Biontech) | 10/7/2021 | 84  | None                                    | None                      |
| C3.212 | 3 | 27 | Female | Negative | Negative | No | No     | No | 2nd dose     | Comirnaty (Biontech)     | Comirnaty (Biontech) | 20/6/2021 | 104 | None                                    | None                      |
| C3.213 | 3 | 38 | Female | Negative | Negative | No | No     | No | 2nd dose     | Covid-19 (Moderna)       | Covid-19 (Moderna)   | 10/2/2021 | 234 | None                                    | None                      |
| C3.214 | 3 | 22 | Female | Negative | Negative | No | No     | No | 2nd dose     | Comirnaty (Biontech)     | Comirnaty (Biontech) | 20/5/2021 | 135 | None                                    | None                      |
| C3.215 | 3 | 19 | Female | Negative | Negative | No | No     | No | Unvaccinated |                          |                      |           |     | None                                    | None                      |
| C3.216 | 3 | 49 | Female | Negative | Negative | No | No     | No | 2nd dose     | Comirnaty (Biontech)     | Comirnaty (Biontech) | 12/2/2021 | 232 | Hypertension                            | Candesartan               |
| C3.217 | 3 | 24 | Female | Negative | Negative | No | Yes    | No | 1st dose     | Comirnaty (Biontech)     |                      | 25/8/2021 | 38  | None                                    | None                      |
| C3.218 | 3 | 22 | Female | Negative | Negative | No | No     | No | 2nd dose     | Comirnaty (Biontech)     | Comirnaty (Biontech) | 12/6/2021 | 112 | None                                    | None                      |
| C3.219 | 3 | 37 | Female | Negative | Negative | No | No     | No | 2nd dose     | Comirnaty (Biontech)     | Comirnaty (Biontech) | 1/8/2021  | 62  | None                                    | None                      |
| C3.220 | 3 | 39 | Female | Negative | Negative | No | Unsure | No | Unvaccinated |                          |                      |           |     | None                                    | None                      |
| C3.221 | 3 | 31 | Male   | Negative | Negative | No | No     | No | 2nd dose     | Comirnaty (Biontech)     | Comirnaty (Biontech) | 20/8/2021 | 43  | None                                    | None                      |
| C3.222 | 3 | 24 | Female | Negative | Negative | No | No     | No | 2nd dose     | Vaxzevria (Astra-Zeneca) | Covid-19 (Moderna)   | 9/6/2021  | 115 | None                                    | None                      |
| C3.223 | 3 | 30 | Female | Negative | Negative | No | No     | No | 2nd dose     | Comirnaty (Biontech)     | Comirnaty (Biontech) | 20/8/2021 | 43  | None                                    | None                      |
| C3.224 | 3 | 45 | Female | Negative | Negative | No | No     | No | 2nd dose     | Comirnaty (Biontech)     | Comirnaty (Biontech) | 1/7/2021  | 93  | None                                    | None                      |
| C3.225 | 3 | 23 | Male   | Negative | Negative | No | No     | No | 2nd dose     | Vaxzevria (Astra-Zeneca) | Comirnaty (Biontech) | 28/7/2021 | 66  | None                                    | None                      |
| C3.226 | 3 | 31 | Female | Negative | Negative | No | No     | No | 2nd dose     | Comirnaty (Biontech)     | Comirnaty (Biontech) | 11/6/2021 | 113 | Polycystic kidney disease, hypertension | Irbesartan, chlortalidone |
| C3.227 | 3 | 35 | Female | Negative | Negative | No | No     | No | 2nd dose     | Comirnaty (Biontech)     | Comirnaty (Biontech) | 8/7/2021  | 86  | Epilepsy                                | Lamotrigin                |
| C3.228 | 3 | 26 | Female | Negative | Negative | No | No     | No | 2nd dose     | Comirnaty (Biontech)     | Comirnaty (Biontech) | 29/5/2021 | 126 | None                                    | None                      |
| C3.229 | 3 | 23 | Female | Negative | Negative | No | No     | No | 2nd dose     | Comirnaty (Biontech)     | Comirnaty (Biontech) | 12/7/2021 | 82  | None                                    | None                      |
| C3.230 | 3 | 25 | Female | Negative | Negative | No | No     | No | 2nd dose     | Comirnaty (Biontech)     | Comirnaty (Biontech) | 21/7/2021 | 73  | None                                    | None                      |
| C3.231 | 3 | 33 | Male   | Negative | Negative | No | No     | No | 2nd dose     | Comirnaty (Biontech)     | Comirnaty (Biontech) | 9/6/2021  | 115 | None                                    | None                      |

|        |   |    |        |          |          |    |    |    |              |                          |                          |           |     |                            |                   |
|--------|---|----|--------|----------|----------|----|----|----|--------------|--------------------------|--------------------------|-----------|-----|----------------------------|-------------------|
| C3.232 | 3 | 25 | Female | Negative | Negative | No | No | No | 2nd dose     | Vaxzevria (Astra-Zeneca) | Comirnaty (Biontech)     | 7/6/2021  | 117 | None                       | None              |
| C3.233 | 3 | 24 | Female | Negative | Negative | No | No | No | 2nd dose     | Covid-19 (Moderna)       | Covid-19 (Moderna)       | 30/7/2021 | 64  | None                       | None              |
| C3.234 | 3 | 19 | Female | Negative | Negative | No | No | No | 2nd dose     | Comirnaty (Biontech)     | Comirnaty (Biontech)     | 18/9/2021 | 14  | None                       | None              |
| C3.235 | 3 | 52 | Male   | Negative | Negative | No | No | No | 2nd dose     | Comirnaty (Biontech)     | Comirnaty (Biontech)     | 1/8/2021  | 62  | None                       | None              |
| C3.236 | 3 | 49 | Female | Negative | Negative | No | No | No | 2nd dose     | Comirnaty (Biontech)     | Comirnaty (Biontech)     | 1/8/2021  | 62  | None                       | None              |
| C3.237 | 3 | 18 | Female | Negative | Negative | No | No | No | 2nd dose     | Covid-19 (Moderna)       | Covid-19 (Moderna)       | 15/9/2021 | 17  | None                       | None              |
| C3.238 | 3 | 20 | Female | Negative | Negative | No | No | No | 2nd dose     | Comirnaty (Biontech)     | Comirnaty (Biontech)     | 23/6/2021 | 101 | Multiple sclerosis, asthma | Dimethyl fumarate |
| C3.239 | 3 | 20 | Male   | Negative | Negative | No | No | No | 2nd dose     | Vaxzevria (Astra-Zeneca) | Comirnaty (Biontech)     | 13/7/2021 | 81  | None                       | None              |
| C3.240 | 3 | 20 | Female | Negative | Negative | No | No | No | Unvaccinated |                          |                          |           |     | None                       | None              |
| C3.241 | 3 | 36 | Female | Negative | Negative | No | No | No | 2nd dose     | Covid-19 (Moderna)       | Covid-19 (Moderna)       | 11/8/2021 | 52  | None                       | None              |
| C3.242 | 3 | 22 | Female | Negative | Negative | No | No | No | 2nd dose     | Covid-19 (Moderna)       | Covid-19 (Moderna)       | 8/8/2021  | 55  | None                       | None              |
| C3.243 | 3 | 30 | Female | Negative | Negative | No | No | No | 2nd dose     | Vaxzevria (Astra-Zeneca) | Comirnaty (Biontech)     | N/A       | N/A | None                       | None              |
| C3.244 | 3 | 21 | Female | Negative | Negative | No | No | No | 2nd dose     | Comirnaty (Biontech)     | Comirnaty (Biontech)     | 27/9/2021 | 5   | None                       | None              |
| C3.245 | 3 | 21 | Male   | Negative | Negative | No | No | No | 2nd dose     | Comirnaty (Biontech)     | Comirnaty (Biontech)     | 25/6/2021 | 99  | None                       | None              |
| C3.246 | 3 | 21 | Female | Negative | Negative | No | No | No | 2nd dose     | Comirnaty (Biontech)     | Comirnaty (Biontech)     | 23/7/2021 | 71  | None                       | None              |
| C3.247 | 3 | 39 | Male   | Negative | Negative | No | No | No | 2nd dose     | Comirnaty (Biontech)     | Comirnaty (Biontech)     | 7/7/2021  | 87  | None                       | None              |
| C3.248 | 3 | 23 | Male   | Negative | Negative | No | No | No | 2nd dose     | Vaxzevria (Astra-Zeneca) | Comirnaty (Biontech)     | 4/5/2021  | 151 | None                       | None              |
| C3.249 | 3 | 20 | Female | Negative | Negative | No | No | No | 2nd dose     | Comirnaty (Biontech)     | Comirnaty (Biontech)     | 27/7/2021 | 67  | None                       | None              |
| C3.250 | 3 | 34 | Female | Negative | Negative | No | No | No | 2nd dose     | Comirnaty (Biontech)     | Comirnaty (Biontech)     | 22/6/2021 | 102 | None                       | None              |
| C3.251 | 3 | 61 | Male   | Negative | Negative | No | No | No | 2nd dose     | Vaxzevria (Astra-Zeneca) | Vaxzevria (Astra-Zeneca) | 20/5/2021 | 135 | None                       | None              |



|        |   |    |        |          |          |    |        |    |              |                          |                      |           |     |                |             |
|--------|---|----|--------|----------|----------|----|--------|----|--------------|--------------------------|----------------------|-----------|-----|----------------|-------------|
| C3.252 | 3 | 60 | Female | Negative | Negative | No | No     | No | 2nd dose     | Comirnaty (Biontech)     | Comirnaty (Biontech) | 19/5/2021 | 136 | Breast cancer  | Letrozol    |
| C3.253 | 3 | 37 | Male   | Negative | Negative | No | No     | No | 1st dose     | Johnson & Johnson        |                      | 1/6/2021  | 123 | None           | None        |
| C3.254 | 3 | 28 | Female | Negative | Negative | No | No     | No | 2nd dose     | Comirnaty (Biontech)     | Comirnaty (Biontech) | 14/7/2021 | 80  | Hypothyroidism | L-thyroxine |
| C3.255 | 3 | 59 | Female | Negative | Negative | No | Unsure | No | Unvaccinated |                          |                      |           |     | None           | None        |
| C3.256 | 3 | 25 | Male   | Negative | Negative | No | No     | No | 2nd dose     | Comirnaty (Biontech)     | Comirnaty (Biontech) | 12/6/2021 | 112 | None           | None        |
| C3.257 | 3 | 29 | Female | Negative | Negative | No | Unsure | No | Unvaccinated |                          |                      |           |     | None           | None        |
| C3.258 | 3 | 26 | Female | Negative | Negative | No | No     | No | 2nd dose     | Comirnaty (Biontech)     | Comirnaty (Biontech) | 27/7/2021 | 67  | None           | None        |
| C3.259 | 3 | 28 | Male   | Negative | Negative | No | No     | No | 2nd dose     | Comirnaty (Biontech)     | Comirnaty (Biontech) | 27/7/2021 | 67  | None           | None        |
| C3.260 | 3 | 31 | Male   | Negative | Negative | No | Unsure | No | 2nd dose     | Covid-19 (Moderna)       | Covid-19 (Moderna)   | 24/7/2021 | 70  | Hypertension   | Rampiril    |
| C3.261 | 3 | 54 | Male   | Negative | Negative | No | No     | No | 2nd dose     | Comirnaty (Biontech)     | Comirnaty (Biontech) | 22/6/2021 | 102 | None           | None        |
| C3.262 | 3 | 31 | Female | Negative | Negative | No | No     | No | 2nd dose     | Covid-19 (Moderna)       | Covid-19 (Moderna)   | 24/7/2021 | 70  | None           | None        |
| C3.263 | 3 | 24 | Male   | Negative | Negative | No | No     | No | 2nd dose     | Vaxzevria (Astra-Zeneca) | Covid-19 (Moderna)   | 30/7/2021 | 64  | None           | None        |
| C3.264 | 3 | 23 | Female | Negative | Negative | No | No     | No | 2nd dose     | Comirnaty (Biontech)     | Comirnaty (Biontech) | 27/6/2021 | 97  | None           | None        |
| C3.265 | 3 | 22 | Male   | Negative | Negative | No | No     | No | 2nd dose     | Vaxzevria (Astra-Zeneca) | Comirnaty (Biontech) | 2/7/2021  | 92  | None           | None        |
| C3.266 | 3 | 20 | Female | Negative | Negative | No | No     | No | 2nd dose     | Covid-19 (Moderna)       | Covid-19 (Moderna)   | 27/8/2021 | 36  | None           | None        |
| C3.267 | 3 | 24 | Female | Negative | Negative | No | No     | No | 2nd dose     | Comirnaty (Biontech)     | Comirnaty (Biontech) | N/A       | N/A | None           | None        |
| C3.268 | 3 | 26 | Male   | Negative | Negative | No | Yes    | No | 1st dose     | Comirnaty (Biontech)     |                      | 25/8/2021 | 38  | None           | None        |
| C3.269 | 3 | 43 | Female | Negative | Negative | No | No     | No | 2nd dose     | Comirnaty (Biontech)     | Comirnaty (Biontech) | 16/6/2021 | 108 | None           | None        |
| C3.270 | 3 | 30 | Female | Negative | Negative | No | No     | No | 2nd dose     | Comirnaty (Biontech)     | Comirnaty (Biontech) | 22/7/2021 | 72  | None           | None        |
| C3.271 | 3 | 24 | Female | Negative | Negative | No | No     | No | 2nd dose     | Comirnaty (Biontech)     | Comirnaty (Biontech) | 21/7/2021 | 73  | None           | None        |
| C3.272 | 3 | 26 | Male   | Negative | Negative | No | No     | No | 1st dose     | Johnson & Johnson        |                      | 24/6/2021 | 100 | None           | None        |
| C3.273 | 3 | 27 | Female | Negative | Negative | No | No     | No | 2nd dose     | Comirnaty (Biontech)     | Comirnaty (Biontech) | 25/1/2021 | 250 | None           | None        |

|        |   |    |        |          |          |    |        |    |              |                          |                      |           |     |                     |                                                                                                                                                           |
|--------|---|----|--------|----------|----------|----|--------|----|--------------|--------------------------|----------------------|-----------|-----|---------------------|-----------------------------------------------------------------------------------------------------------------------------------------------------------|
| C3.274 | 3 | 20 | Female | Negative | Negative | No | No     | No | 2nd dose     | Comirnaty (Biontech)     | Comirnaty (Biontech) | 17/2/2021 | 227 | None                | None                                                                                                                                                      |
| C3.275 | 3 | 22 | Female | Negative | Negative | No | No     | No | 2nd dose     | Covid-19 (Moderna)       | Covid-19 (Moderna)   | 22/7/2021 | 72  | None                | None                                                                                                                                                      |
| C3.276 | 3 | 27 | Female | Negative | Negative | No | No     | No | 1st dose     | Johnson & Johnson        |                      | N/A       | N/A | None                | None                                                                                                                                                      |
| C3.277 | 3 | 25 | Female | Negative | Negative | No | No     | No | 2nd dose     | Vaxzevria (Astra-Zeneca) | Comirnaty (Biontech) | 29/7/2021 | 65  | None                | None                                                                                                                                                      |
| C3.278 | 3 | 24 | Female | Negative | Negative | No | No     | No | Unvaccinated |                          |                      |           |     | None                | None                                                                                                                                                      |
| C3.279 | 3 | 29 | Male   | Negative | Negative | No | No     | No | 2nd dose     | Comirnaty (Biontech)     | Comirnaty (Biontech) | 8/7/2021  | 86  | None                | None                                                                                                                                                      |
| C3.280 | 3 | 37 | Female | Negative | Negative | No | No     | No | 2nd dose     | Comirnaty (Biontech)     | Comirnaty (Biontech) | 27/7/2021 | 67  | None                | None                                                                                                                                                      |
| C3.281 | 3 | 29 | Female | Negative | Negative | No | No     | No | 2nd dose     | Covid-19 (Moderna)       | Covid-19 (Moderna)   | 27/7/2021 | 67  | None                | None                                                                                                                                                      |
| C3.282 | 3 | 55 | Male   | Negative | Negative | No | No     | No | 2nd dose     | Comirnaty (Biontech)     | Comirnaty (Biontech) | 22/6/2021 | 102 | None                | None                                                                                                                                                      |
| C3.283 | 3 | 50 | Female | Negative | Negative | No | No     | No | 2nd dose     | Comirnaty (Biontech)     | Comirnaty (Biontech) | 20/5/2021 | 135 | Renal insufficiency | Metoprolol, ramipril, amlodipine, dihydralazine, furosemide, sodium hydrogen carbonate, allopurinol, atorvastatin, tamsulosin, phosphorus-lowering agents |
| C3.284 | 3 | 30 | Male   | Negative | Negative | No | No     | No | 2nd dose     | Comirnaty (Biontech)     | Comirnaty (Biontech) | 21/7/2021 | 73  | None                | None                                                                                                                                                      |
| C3.285 | 3 | 54 | Female | Negative | Negative | No | No     | No | 2nd dose     | Comirnaty (Biontech)     | Comirnaty (Biontech) | 20/7/2021 | 74  | None                | None                                                                                                                                                      |
| C3.286 | 3 | 28 | Female | Negative | Negative | No | No     | No | 2nd dose     | Comirnaty (Biontech)     | Comirnaty (Biontech) | 3/8/2021  | 60  | None                | None                                                                                                                                                      |
| C3.287 | 3 | 24 | Female | Negative | Negative | No | No     | No | 2nd dose     | Comirnaty (Biontech)     | Comirnaty (Biontech) | 16/7/2021 | 78  | None                | None                                                                                                                                                      |
| C3.288 | 3 | 26 | Male   | Negative | Negative | No | No     | No | 2nd dose     | Comirnaty (Biontech)     | Comirnaty (Biontech) | 16/7/2021 | 78  | None                | None                                                                                                                                                      |
| C3.289 | 3 | 28 | Male   | Negative | Negative | No | No     | No | 2nd dose     | Comirnaty (Biontech)     | Comirnaty (Biontech) | 20/5/2021 | 135 | None                | None                                                                                                                                                      |
| C3.290 | 3 | 24 | Male   | Negative | Negative | No | Unsure | No | Unvaccinated |                          |                      |           |     | None                | None                                                                                                                                                      |

|        |   |     |        |          |          |    |    |    |              |                          |                      |           |     |                |                                   |
|--------|---|-----|--------|----------|----------|----|----|----|--------------|--------------------------|----------------------|-----------|-----|----------------|-----------------------------------|
| C3.291 | 3 | 25  | Female | Negative | Negative | No | No | No | 2nd dose     | Vaxzevria (Astra-Zeneca) | Comirnaty (Biontech) | 14/6/2021 | 110 | Hypertension   | Bisoprolol, Ramipril, Desogestrel |
| C3.292 | 3 | 27  | Female | Negative | Negative | No | No | No | 2nd dose     | Comirnaty (Biontech)     | Comirnaty (Biontech) | 28/7/2021 | 66  | None           | None                              |
| C3.293 | 3 | 27  | Male   | Negative | Negative | No | No | No | 2nd dose     | Covid-19 (Moderna)       | Covid-19 (Moderna)   | 19/7/2021 | 75  | None           | None                              |
| C3.294 | 3 | 23  | Female | Negative | Negative | No | No | No | 2nd dose     | Comirnaty (Biontech)     | Comirnaty (Biontech) | 15/6/2021 | 109 | None           | None                              |
| C3.295 | 3 | 25  | Female | Negative | Negative | No | No | No | 2nd dose     | Comirnaty (Biontech)     | Comirnaty (Biontech) | 8/7/2021  | 86  | None           | None                              |
| C3.296 | 3 | 29  | Male   | Negative | Negative | No | No | No | 2nd dose     | Comirnaty (Biontech)     | Comirnaty (Biontech) | 12/2/2021 | 232 | None           | None                              |
| C3.297 | 3 | 28  | Male   | Negative | Negative | No | No | No | 2nd dose     | Comirnaty (Biontech)     | Comirnaty (Biontech) | 6/8/2021  | 57  | None           | None                              |
| C3.298 | 3 | 25  | Female | Negative | Negative | No | No | No | 2nd dose     | Comirnaty (Biontech)     | Comirnaty (Biontech) | 26/7/2021 | 68  | None           | None                              |
| C3.299 | 3 | 32  | Male   | Negative | Negative | No | No | No | 2nd dose     | Comirnaty (Biontech)     | Comirnaty (Biontech) | 1/8/2021  | 62  | None           | None                              |
| C3.300 | 3 | 37  | Female | Negative | Negative | No | No | No | Unvaccinated |                          |                      |           |     | None           | None                              |
| C3.301 | 3 | 32  | Female | Negative | Negative | No | No | No | Unvaccinated |                          |                      |           |     | None           | None                              |
| C3.302 | 3 | 23  | Female | Negative | Negative | No | No | No | 2nd dose     | Comirnaty (Biontech)     | Comirnaty (Biontech) | 12/2/2021 | 232 | Hypothyroidism | L-thyroxine                       |
| C3.303 | 3 | 27  | Male   | Negative | Negative | No | No | No | 2nd dose     | Vaxzevria (Astra-Zeneca) | Comirnaty (Biontech) | 16/6/2021 | 108 | None           | None                              |
| C3.304 | 3 | 18  | Female | Negative | Negative | No | No | No | 2nd dose     | Comirnaty (Biontech)     | Comirnaty (Biontech) | 8/6/2021  | 116 | None           | None                              |
| C3.305 | 3 | 29  | Female | Negative | Negative | No | No | No | 2nd dose     | Comirnaty (Biontech)     | Comirnaty (Biontech) | 23/9/2021 | 9   | None           | None                              |
| C3.306 | 3 | 41  | Female | Negative | Negative | No | No | No | 2nd dose     | Vaxzevria (Astra-Zeneca) | Covid-19 (Moderna)   | 20/6/2021 | 104 | None           | None                              |
| C3.307 | 3 | 37  | Female | Negative | Negative | No | No | No | 2nd dose     | Comirnaty (Biontech)     | Comirnaty (Biontech) | 15/6/2021 | 109 | None           | None                              |
| C3.308 | 3 | 19  | Female | Negative | Negative | No | No | No | 2nd dose     | Johnson & Johnson        | Other vaccine        | 23/6/2021 | 101 | None           | None                              |
| C3.309 | 3 | 19  | Male   | Negative | Negative | No | No | No | 2nd dose     | Comirnaty (Biontech)     | Comirnaty (Biontech) | 6/7/2021  | 88  | None           | None                              |
| C3.310 | 3 | N/A | Female | Negative | Negative | No | No | No | 2nd dose     | Comirnaty (Biontech)     | Comirnaty (Biontech) | 28/7/2021 | 66  | None           | None                              |
| C3.311 | 3 | 52  | Male   | Negative | Negative | No | No | No | 2nd dose     | Comirnaty (Biontech)     | Comirnaty (Biontech) | 8/7/2021  | 86  | None           | None                              |
| C3.312 | 3 | 34  | Female | Negative | Negative | No | No | No | 2nd dose     | Covid-19 (Moderna)       | Covid-19 (Moderna)   | 28/7/2021 | 66  | None           | None                              |

|        |   |    |        |          |          |    |     |     |              |                          |                          |           |     |                                   |                                    |
|--------|---|----|--------|----------|----------|----|-----|-----|--------------|--------------------------|--------------------------|-----------|-----|-----------------------------------|------------------------------------|
| C3.313 | 3 | 33 | Male   | Negative | Negative | No | No  | No  | 2nd dose     | Covid-19 (Moderna)       | Covid-19 (Moderna)       | 26/7/2021 | 68  | None                              | None                               |
| C3.314 | 3 | 29 | Female | Negative | Negative | No | No  | No  | 2nd dose     | Covid-19 (Moderna)       | Covid-19 (Moderna)       | 20/5/2021 | 135 | None                              | None                               |
| C3.315 | 3 | 28 | Female | Negative | Negative | No | Yes | No  | 1st dose     | Comirnaty (Biontech)     |                          | 9/6/2021  | 115 | None                              | None                               |
| C3.316 | 3 | 26 | Female | Negative | Negative | No | No  | No  | 2nd dose     | Comirnaty (Biontech)     | Comirnaty (Biontech)     | 8/7/2021  | 86  | None                              | None                               |
| C3.317 | 3 | 29 | Male   | Negative | Negative | No | No  | No  | Unvaccinated |                          |                          |           |     | None                              | None                               |
| C3.318 | 3 | 24 | Male   | Negative | Negative | No | No  | No  | 2nd dose     | Comirnaty (Biontech)     | Comirnaty (Biontech)     | 19/8/2021 | 44  | None                              | None                               |
| C3.319 | 3 | 29 | Female | Negative | Negative | No | No  | No  | 2nd dose     | Comirnaty (Biontech)     | Comirnaty (Biontech)     | 26/6/2021 | 98  | None                              | None                               |
| C3.320 | 3 | 26 | Female | Negative | Negative | No | No  | No  | 2nd dose     | Covid-19 (Moderna)       | Covid-19 (Moderna)       | 14/9/2021 | 18  | None                              | None                               |
| C3.321 | 3 | 36 | Male   | Negative | Negative | No | No  | No  | 2nd dose     | Comirnaty (Biontech)     | Comirnaty (Biontech)     | 28/7/2021 | 66  | Crohn's disease                   | None                               |
| C3.322 | 3 | 26 | Female | Negative | Negative | No | No  | No  | 2nd dose     | Comirnaty (Biontech)     | Comirnaty (Biontech)     | 26/5/2021 | 129 | None                              | None                               |
| C3.323 | 3 | 31 | Female | Negative | Negative | No | No  | No  | 2nd dose     | Comirnaty (Biontech)     | Comirnaty (Biontech)     | N/A       | N/A | None                              | None                               |
| C3.324 | 3 | 19 | Female | Negative | Negative | No | No  | No  | 2nd dose     | Comirnaty (Biontech)     | Comirnaty (Biontech)     | 29/7/2021 | 65  | None                              | None                               |
| C3.325 | 3 | 69 | Male   | Negative | Negative | No | No  | No  | 2nd dose     | Comirnaty (Biontech)     | Comirnaty (Biontech)     | 7/5/2021  | 148 | None                              | None                               |
| C3.326 | 3 | 48 | Male   | Negative | Negative | No | No  | No  | Unvaccinated |                          |                          |           |     | None                              | None                               |
| C3.327 | 3 | 36 | Female | Negative | Negative | No | No  | No  | 2nd dose     | Comirnaty (Biontech)     | Comirnaty (Biontech)     | 30/6/2021 | 94  | None                              | None                               |
| C3.328 | 3 | 28 | Male   | Negative | Negative | No | No  | No  | 2nd dose     | Comirnaty (Biontech)     | Comirnaty (Biontech)     | 30/7/2021 | 64  | None                              | None                               |
| C3.329 | 3 | 35 | Male   | Negative | Negative | No | Yes | Yes | 2nd dose     | Comirnaty (Biontech)     | Comirnaty (Biontech)     | 21/7/2021 | 73  | Bronchial asthma, neurodermatitis | Salmeterol+fluticasone, salbutamol |
| C3.330 | 3 | 23 | Female | Negative | Negative | No | No  | No  | 2nd dose     | Vaxzevria (Astra-Zeneca) | Comirnaty (Biontech)     | 18/5/2021 | 137 | None                              | None                               |
| C3.331 | 3 | 29 | Female | Negative | Negative | No | No  | No  | 2nd dose     | Vaxzevria (Astra-Zeneca) | Comirnaty (Biontech)     | 28/5/2021 | 127 | None                              | None                               |
| C3.332 | 3 | 32 | Male   | Negative | Negative | No | No  | No  | 2nd dose     | Comirnaty (Biontech)     | Comirnaty (Biontech)     | N/A       | N/A | None                              | None                               |
| C3.333 | 3 | 52 | Female | Negative | Negative | No | No  | No  | Unvaccinated |                          |                          |           |     | None                              | None                               |
| C3.334 | 3 | 36 | Female | Negative | Negative | No | No  | No  | 2nd dose     | Vaxzevria (Astra-Zeneca) | Vaxzevria (Astra-Zeneca) | 4/6/2021  | 120 | None                              | None                               |

|        |   |    |        |          |          |    |        |    |          |                          |                          |           |     |                                                       |                          |
|--------|---|----|--------|----------|----------|----|--------|----|----------|--------------------------|--------------------------|-----------|-----|-------------------------------------------------------|--------------------------|
| C3.335 | 3 | 29 | Female | Negative | Negative | No | Unsure | No | 2nd dose | Comirnaty (Biontech)     | Comirnaty (Biontech)     | 1/6/2021  | 123 | Bronchial asthma                                      | Beclomethasone           |
| C3.336 | 3 | 57 | Male   | Negative | Negative | No | No     | No | 2nd dose | Vaxzevria (Astra-Zeneca) | Comirnaty (Biontech)     | 6/7/2021  | 88  | Hypertension                                          | Candesartan              |
| C3.337 | 3 | 42 | Female | Negative | Negative | No | No     | No | 2nd dose | Comirnaty (Biontech)     | Comirnaty (Biontech)     | 10/6/2021 | 114 | None                                                  | None                     |
| C3.338 | 3 | 24 | Female | Negative | Negative | No | No     | No | 2nd dose | Comirnaty (Biontech)     | Comirnaty (Biontech)     | 20/7/2021 | 74  | None                                                  | None                     |
| C3.339 | 3 | 48 | Female | Negative | Negative | No | No     | No | 2nd dose | Covid-19 (Moderna)       | Covid-19 (Moderna)       | 28/5/2021 | 127 | Hypertension, hay fever, nuts allergy, hypothyroidism | Candesartan, l-thyroxine |
| C3.340 | 3 | 22 | Female | Negative | Negative | No | No     | No | 2nd dose | Comirnaty (Biontech)     | Comirnaty (Biontech)     | 14/7/2021 | 80  | None                                                  | None                     |
| C3.341 | 3 | 28 | Female | Negative | Negative | No | No     | No | 2nd dose | Comirnaty (Biontech)     | Comirnaty (Biontech)     | 3/9/2021  | 29  | None                                                  | None                     |
| C3.342 | 3 | 20 | Female | Negative | Negative | No | No     | No | 2nd dose | Comirnaty (Biontech)     | Comirnaty (Biontech)     | 21/7/2021 | 73  | None                                                  | None                     |
| C3.343 | 3 | 40 | Female | Negative | Negative | No | No     | No | 2nd dose | Vaxzevria (Astra-Zeneca) | Comirnaty (Biontech)     | 7/5/2021  | 148 | None                                                  | None                     |
| C3.344 | 3 | 24 | Male   | Negative | Negative | No | No     | No | 2nd dose | Comirnaty (Biontech)     | Comirnaty (Biontech)     | 24/9/2021 | 8   | None                                                  | None                     |
| C3.345 | 3 | 33 | Male   | Negative | Negative | No | No     | No | 2nd dose | Comirnaty (Biontech)     | Comirnaty (Biontech)     | N/A       | N/A | None                                                  | None                     |
| C3.346 | 3 | 36 | Female | Negative | Negative | No | No     | No | 2nd dose | Comirnaty (Biontech)     | Comirnaty (Biontech)     | 30/7/2021 | 64  | None                                                  | None                     |
| C3.347 | 3 | 24 | Female | Negative | Negative | No | No     | No | 2nd dose | Comirnaty (Biontech)     | Comirnaty (Biontech)     | 27/8/2021 | 36  | None                                                  | None                     |
| C3.348 | 3 | 32 | Male   | Negative | Negative | No | No     | No | 2nd dose | Vaxzevria (Astra-Zeneca) | Vaxzevria (Astra-Zeneca) | 27/5/2021 | 128 | None                                                  | None                     |
| C3.349 | 3 | 31 | Female | Negative | Negative | No | No     | No | 2nd dose | Comirnaty (Biontech)     | Comirnaty (Biontech)     | 16/6/2021 | 108 | None                                                  | None                     |
| C3.350 | 3 | 29 | Female | Negative | Negative | No | No     | No | 2nd dose | Comirnaty (Biontech)     | Comirnaty (Biontech)     | 20/7/2021 | 74  | None                                                  | None                     |
| C3.351 | 3 | 35 | Male   | Negative | Negative | No | No     | No | 2nd dose | Comirnaty (Biontech)     | Comirnaty (Biontech)     | 1/8/2021  | 62  | None                                                  | None                     |
| C3.352 | 3 | 30 | Female | Negative | Negative | No | No     | No | 2nd dose | Covid-19 (Moderna)       | Covid-19 (Moderna)       | 28/5/2021 | 127 | None                                                  | None                     |
| C3.353 | 3 | 30 | Female | Negative | Negative | No | No     | No | 2nd dose | Comirnaty (Biontech)     | Comirnaty (Biontech)     | 1/8/2021  | 62  | None                                                  | None                     |
| C3.354 | 3 | 25 | Female | Negative | Negative | No | No     | No | 2nd dose | Comirnaty (Biontech)     | Comirnaty (Biontech)     | 26/7/2021 | 68  | None                                                  | None                     |

|        |   |    |        |          |          |    |     |    |              |                          |                      |           |     |                  |                                      |
|--------|---|----|--------|----------|----------|----|-----|----|--------------|--------------------------|----------------------|-----------|-----|------------------|--------------------------------------|
| C3.355 | 3 | 25 | Male   | Negative | Negative | No | No  | No | 2nd dose     | Comirnaty (Biontech)     | Comirnaty (Biontech) | 14/8/2021 | 49  | None             | None                                 |
| C3.356 | 3 | 30 | Male   | Negative | Negative | No | No  | No | 2nd dose     | Comirnaty (Biontech)     | Comirnaty (Biontech) | 9/6/2021  | 115 | None             | None                                 |
| C3.357 | 3 | 27 | Female | Negative | Negative | No | No  | No | 2nd dose     | Comirnaty (Biontech)     | Comirnaty (Biontech) | 9/6/2021  | 115 | None             | None                                 |
| C3.358 | 3 | 25 | Male   | Negative | Negative | No | No  | No | Unvaccinated |                          |                      |           |     | None             | None                                 |
| C3.359 | 3 | 20 | Female | Negative | Negative | No | No  | No | Unvaccinated |                          |                      |           |     | None             | None                                 |
| C3.360 | 3 | 34 | Female | Negative | Negative | No | No  | No | 2nd dose     | Johnson & Johnson        | Other vaccine        | N/A       | N/A | Hypertension     | Beta-blocker, prednisone             |
| C3.361 | 3 | 22 | Female | Negative | Negative | No | No  | No | 2nd dose     | Comirnaty (Biontech)     | Comirnaty (Biontech) | 30/7/2021 | 64  | None             | None                                 |
| C3.362 | 3 | 26 | Male   | Negative | Negative | No | No  | No | 1st dose     | Johnson & Johnson        |                      | 10/6/2021 | 114 | None             | None                                 |
| C3.363 | 3 | 23 | Male   | Negative | Negative | No | No  | No | 2nd dose     | Covid-19 (Moderna)       | Covid-19 (Moderna)   | 10/8/2021 | 53  | None             | None                                 |
| C3.364 | 3 | 22 | Female | Negative | Negative | No | No  | No | 2nd dose     | Comirnaty (Biontech)     | Comirnaty (Biontech) | 15/7/2021 | 79  | None             | None                                 |
| C3.365 | 3 | 48 | Female | Negative | Negative | No | No  | No | 2nd dose     | Vaxzevria (Astra-Zeneca) | Comirnaty (Biontech) | 7/5/2021  | 148 | Hypertension     | Mirtazapine, ramipril, chlormadinone |
| C3.366 | 3 | 29 | Female | Negative | Negative | No | No  | No | 2nd dose     | Comirnaty (Biontech)     | Comirnaty (Biontech) | 26/7/2021 | 68  | None             | None                                 |
| C3.367 | 3 | 19 | Male   | Negative | Negative | No | No  | No | 2nd dose     | Comirnaty (Biontech)     | Comirnaty (Biontech) | 19/5/2021 | 136 | None             | None                                 |
| C3.368 | 3 | 45 | Female | Negative | Negative | No | No  | No | 2nd dose     | Comirnaty (Biontech)     | Comirnaty (Biontech) | 28/5/2021 | 127 | None             | None                                 |
| C3.369 | 3 | 28 | Female | Negative | Negative | No | No  | No | 2nd dose     | Covid-19 (Moderna)       | Covid-19 (Moderna)   | 29/6/2021 | 95  | None             | None                                 |
| C3.370 | 3 | 28 | Male   | Negative | Negative | No | No  | No | 1st dose     | Johnson & Johnson        |                      | 10/6/2021 | 114 | None             | None                                 |
| C3.371 | 3 | 25 | Female | Negative | Negative | No | No  | No | 2nd dose     | Comirnaty (Biontech)     | Comirnaty (Biontech) | 15/7/2021 | 79  | None             | None                                 |
| C3.372 | 3 | 20 | Female | Negative | Negative | No | No  | No | 1st dose     | Comirnaty (Biontech)     |                      | 20/9/2021 | 12  | None             | None                                 |
| C3.373 | 3 | 21 | Female | Negative | Negative | No | No  | No | 2nd dose     | Covid-19 (Moderna)       | Covid-19 (Moderna)   | 17/7/2021 | 77  | None             | None                                 |
| C3.374 | 3 | 38 | Female | Negative | Negative | No | No  | No | 2nd dose     | Covid-19 (Moderna)       | Covid-19 (Moderna)   | 1/5/2021  | 154 | Thyroid disorder | L-thyroxine                          |
| C3.375 | 3 | 27 | Male   | Negative | Negative | No | Yes | No | 1st dose     | Johnson & Johnson        |                      | 16/6/2021 | 108 | None             | None                                 |
| C3.376 | 3 | 41 | Male   | Negative | Negative | No | No  | No | 2nd dose     | Comirnaty (Biontech)     | Comirnaty (Biontech) | 20/6/2021 | 104 | Hypertension     | None                                 |
| C3.377 | 3 | 27 | Female | Negative | Negative | No | No  | No | 2nd dose     | Comirnaty (Biontech)     | Comirnaty (Biontech) | 8/7/2021  | 86  | Diabetes         | Insulin                              |

|        |   |    |        |          |          |    |        |    |              |                          |                      |           |     |                |             |
|--------|---|----|--------|----------|----------|----|--------|----|--------------|--------------------------|----------------------|-----------|-----|----------------|-------------|
| C3.378 | 3 | 22 | Female | Negative | Negative | No | No     | No | 2nd dose     | Comirnaty (Biontech)     | Comirnaty (Biontech) | 22/6/2021 | 102 | None           | None        |
| C3.379 | 3 | 25 | Female | Negative | Negative | No | No     | No | 2nd dose     | Comirnaty (Biontech)     | Comirnaty (Biontech) | 28/7/2021 | 66  | None           | None        |
| C3.380 | 3 | 33 | Female | Negative | Negative | No | No     | No | 2nd dose     | Comirnaty (Biontech)     | Comirnaty (Biontech) | 9/6/2021  | 115 | None           | None        |
| C3.381 | 3 | 27 | Female | Negative | Negative | No | No     | No | 2nd dose     | Comirnaty (Biontech)     | Comirnaty (Biontech) | 22/7/2021 | 72  | None           | None        |
| C3.382 | 3 | 30 | Female | Negative | Negative | No | Unsure | No | 2nd dose     | Comirnaty (Biontech)     | Comirnaty (Biontech) | 9/9/2021  | 23  | None           | None        |
| C3.383 | 3 | 25 | Female | Negative | Negative | No | No     | No | 1st dose     | Comirnaty (Biontech)     |                      | 1/9/2021  | 31  | None           | None        |
| C3.384 | 3 | 32 | Male   | Negative | Negative | No | No     | No | 2nd dose     | Vaxzevria (Astra-Zeneca) | Comirnaty (Biontech) | 10/9/2021 | 22  | None           | None        |
| C3.385 | 3 | 29 | Male   | Negative | Negative | No | No     | No | 2nd dose     | Comirnaty (Biontech)     | Comirnaty (Biontech) | 9/8/2021  | 54  | None           | None        |
| C3.386 | 3 | 57 | Female | Negative | Negative | No | No     | No | 2nd dose     | Comirnaty (Biontech)     | Comirnaty (Biontech) | 3/6/2021  | 121 | None           | None        |
| C3.387 | 3 | 53 | Male   | Negative | Negative | No | No     | No | 1st dose     | Johnson & Johnson        |                      | 9/6/2021  | 115 | None           | None        |
| C3.388 | 3 | 20 | Female | Negative | Negative | No | Unsure | No | 2nd dose     | Comirnaty (Biontech)     | Comirnaty (Biontech) | 11/6/2021 | 113 | None           | None        |
| C3.389 | 3 | 27 | Female | Negative | Negative | No | No     | No | 2nd dose     | Comirnaty (Biontech)     | Comirnaty (Biontech) | 21/9/2021 | 11  | None           | None        |
| C3.390 | 3 | 25 | Male   | Negative | Negative | No | No     | No | 2nd dose     | Covid-19 (Moderna)       | Covid-19 (Moderna)   | N/A       | N/A | None           | None        |
| C3.391 | 3 | 24 | Female | Negative | Negative | No | No     | No | 2nd dose     | Comirnaty (Biontech)     | Comirnaty (Biontech) | 2/7/2021  | 92  | Hypothyroidism | L-thyroxine |
| C3.392 | 3 | 24 | Female | Negative | Negative | No | No     | No | 2nd dose     | Covid-19 (Moderna)       | Covid-19 (Moderna)   | 25/7/2021 | 69  | None           | None        |
| C3.393 | 3 | 53 | Male   | Negative | Negative | No | No     | No | 2nd dose     | Comirnaty (Biontech)     | Comirnaty (Biontech) | 1/6/2021  | 123 | None           | None        |
| C3.394 | 3 | 62 | Female | Negative | Negative | No | No     | No | 2nd dose     | Comirnaty (Biontech)     | Comirnaty (Biontech) | 22/6/2021 | 102 | None           | None        |
| C3.395 | 3 | 50 | Male   | Negative | Negative | No | No     | No | Unvaccinated |                          |                      |           |     | None           | None        |
| C3.396 | 3 | 50 | Female | Negative | Negative | No | No     | No | 2nd dose     | Comirnaty (Biontech)     | Comirnaty (Biontech) | 21/6/2021 | 103 | None           | None        |
| C3.397 | 3 | 24 | Female | Negative | Negative | No | No     | No | 2nd dose     | Comirnaty (Biontech)     | Comirnaty (Biontech) | 6/8/2021  | 57  | None           | None        |
| C3.398 | 3 | 26 | Male   | Negative | Negative | No | No     | No | 1st dose     | Johnson & Johnson        |                      | 30/8/2021 | 33  | None           | None        |
| C3.399 | 3 | 48 | Male   | Negative | Negative | No | No     | No | 2nd dose     | Comirnaty (Biontech)     | Comirnaty (Biontech) | 16/6/2021 | 108 | None           | None        |

|        |   |    |        |          |          |    |        |    |              |                          |                      |           |     |              |      |
|--------|---|----|--------|----------|----------|----|--------|----|--------------|--------------------------|----------------------|-----------|-----|--------------|------|
| C3.400 | 3 | 51 | Female | Negative | Negative | No | No     | No | 2nd dose     | Comirnaty (Biontech)     | Comirnaty (Biontech) | 22/6/2021 | 102 | None         | None |
| C3.401 | 3 | 23 | Female | Negative | Negative | No | No     | No | 2nd dose     | Comirnaty (Biontech)     | Comirnaty (Biontech) | 28/7/2021 | 66  | None         | None |
| C3.402 | 3 | 21 | Male   | Negative | Negative | No | No     | No | Unvaccinated |                          |                      |           |     | None         | None |
| C3.403 | 3 | 53 | Female | Negative | Negative | No | No     | No | 2nd dose     | Covid-19 (Moderna)       | Covid-19 (Moderna)   | 5/5/2021  | 150 | None         | None |
| C3.404 | 3 | 21 | Female | Negative | Negative | No | No     | No | 2nd dose     | Comirnaty (Biontech)     | Comirnaty (Biontech) | 18/8/2021 | 45  | None         | None |
| C3.405 | 3 | 31 | Male   | Negative | Negative | No | No     | No | 2nd dose     | Comirnaty (Biontech)     | Comirnaty (Biontech) | 8/7/2021  | 86  | None         | None |
| C3.406 | 3 | 18 | Female | Negative | Negative | No | Yes    | No | 1st dose     | Comirnaty (Biontech)     |                      | 2/9/2021  | 30  | None         | None |
| C3.407 | 3 | 21 | Male   | Negative | Negative | No | No     | No | 1st dose     | Johnson & Johnson        |                      | 4/6/2021  | 120 | None         | None |
| C3.408 | 3 | 36 | Male   | Negative | Negative | No | No     | No | 2nd dose     | Comirnaty (Biontech)     | Comirnaty (Biontech) | 15/7/2021 | 79  | None         | None |
| C3.409 | 3 | 24 | Female | Negative | Negative | No | No     | No | 2nd dose     | Comirnaty (Biontech)     | Comirnaty (Biontech) | 20/7/2021 | 74  | None         | None |
| C3.410 | 3 | 24 | Male   | Negative | Negative | No | No     | No | 2nd dose     | Covid-19 (Moderna)       | Covid-19 (Moderna)   | 7/7/2021  | 87  | None         | None |
| C3.411 | 3 | 34 | Male   | Negative | Negative | No | No     | No | 2nd dose     | Comirnaty (Biontech)     | Comirnaty (Biontech) | 20/7/2021 | 74  | None         | None |
| C3.412 | 3 | 28 | Female | Negative | Negative | No | No     | No | 2nd dose     | Comirnaty (Biontech)     | Comirnaty (Biontech) | 29/5/2021 | 126 | None         | None |
| C3.413 | 3 | 24 | Male   | Negative | Negative | No | No     | No | 2nd dose     | Comirnaty (Biontech)     | Comirnaty (Biontech) | 12/6/2021 | 112 | None         | None |
| C3.414 | 3 | 27 | Female | Negative | Negative | No | No     | No | 2nd dose     | Comirnaty (Biontech)     | Comirnaty (Biontech) | 16/6/2021 | 108 | None         | None |
| C3.415 | 3 | 54 | Female | Negative | Negative | No | No     | No | Unvaccinated |                          |                      |           |     | None         | None |
| C3.416 | 3 | 23 | Male   | Negative | Negative | No | No     | No | 1st dose     | Johnson & Johnson        |                      | 6/6/2021  | 118 | None         | None |
| C3.417 | 3 | 18 | Male   | Negative | Negative | No | Unsure | No | 1st dose     | Comirnaty (Biontech)     |                      | 30/8/2021 | 33  | Hypertension | None |
| C3.418 | 3 | 20 | Female | Negative | Negative | No | No     | No | 2nd dose     | Covid-19 (Moderna)       | Covid-19 (Moderna)   | 25/8/2021 | 38  | None         | None |
| C3.419 | 3 | 24 | Female | Negative | Negative | No | No     | No | 2nd dose     | Comirnaty (Biontech)     | Comirnaty (Biontech) | 14/7/2021 | 80  | None         | None |
| C3.420 | 3 | 23 | Female | Negative | Negative | No | No     | No | 2nd dose     | Comirnaty (Biontech)     | Comirnaty (Biontech) | 13/7/2021 | 81  | None         | None |
| C3.421 | 3 | 23 | Male   | Negative | Negative | No | No     | No | 1st dose     | Johnson & Johnson        |                      | 31/5/2021 | 124 | None         | None |
| C3.422 | 3 | 22 | Female | Negative | Negative | No | No     | No | 2nd dose     | Vaxzevria (Astra-Zeneca) | Comirnaty (Biontech) | 5/6/2021  | 119 | None         | None |



|        |   |    |        |          |          |    |    |    |          |                          |                      |           |     |      |      |
|--------|---|----|--------|----------|----------|----|----|----|----------|--------------------------|----------------------|-----------|-----|------|------|
| C3.423 | 3 | 23 | Female | Negative | Negative | No | No | No | 2nd dose | Comirnaty (Biontech)     | Comirnaty (Biontech) | 14/7/2021 | 80  | None | None |
| C3.424 | 3 | 29 | Female | Negative | Negative | No | No | No | 2nd dose | Comirnaty (Biontech)     | Comirnaty (Biontech) | 7/6/2021  | 117 | None | None |
| C3.425 | 3 | 27 | Female | Negative | Negative | No | No | No | 2nd dose | Comirnaty (Biontech)     | Comirnaty (Biontech) | 7/7/2021  | 87  | None | None |
| C3.426 | 3 | 30 | Female | Negative | Negative | No | No | No | 2nd dose | Vaxzevria (Astra-Zeneca) | Comirnaty (Biontech) | 5/6/2021  | 119 | None | None |
| C3.427 | 3 | 25 | Male   | Negative | Negative | No | No | No | 2nd dose | Comirnaty (Biontech)     | Comirnaty (Biontech) | 8/6/2021  | 116 | None | None |
| C3.428 | 3 | 24 | Female | Negative | Negative | No | No | No | 2nd dose | Comirnaty (Biontech)     | Comirnaty (Biontech) | 8/6/2021  | 116 | None | None |
| C3.429 | 3 | 29 | Male   | Negative | Negative | No | No | No | 2nd dose | Comirnaty (Biontech)     | Comirnaty (Biontech) | 5/6/2021  | 119 | None | None |
| C3.430 | 3 | 52 | Male   | Negative | Negative | No | No | No | 2nd dose | Covid-19 (Moderna)       | Covid-19 (Moderna)   | 25/7/2021 | 69  | None | None |
| C3.431 | 3 | 25 | Female | Negative | Negative | No | No | No | 2nd dose | Vaxzevria (Astra-Zeneca) | Comirnaty (Biontech) | 7/7/2021  | 87  | None | None |
| C3.432 | 3 | 51 | Female | Negative | Negative | No | No | No | 2nd dose | Covid-19 (Moderna)       | Covid-19 (Moderna)   | 25/7/2021 | 69  | None | None |
| C3.433 | 3 | 27 | Female | Negative | Negative | No | No | No | 2nd dose | Comirnaty (Biontech)     | Comirnaty (Biontech) | 14/7/2021 | 80  | None | None |
| C3.434 | 3 | 37 | Male   | Negative | Negative | No | No | No | 2nd dose | Comirnaty (Biontech)     | Comirnaty (Biontech) | 8/6/2021  | 116 | None | None |
| C3.435 | 3 | 30 | Female | Negative | Negative | No | No | No | 2nd dose | Comirnaty (Biontech)     | Comirnaty (Biontech) | 29/7/2021 | 65  | None | None |
| C3.436 | 3 | 53 | Male   | Negative | Negative | No | No | No | 2nd dose | Comirnaty (Biontech)     | Comirnaty (Biontech) | 20/5/2021 | 135 | None | None |
| C3.437 | 3 | 32 | Male   | Negative | Negative | No | No | No | 2nd dose | Covid-19 (Moderna)       | Covid-19 (Moderna)   | 9/8/2021  | 54  | None | None |
| C3.438 | 3 | 27 | Male   | Negative | Negative | No | No | No | 2nd dose | Comirnaty (Biontech)     | Comirnaty (Biontech) | 21/6/2021 | 103 | None | None |
| C3.439 | 3 | 66 | Female | Negative | Negative | No | No | No | 2nd dose | Covid-19 (Moderna)       | Covid-19 (Moderna)   | 17/5/2021 | 138 | None | None |
| C3.440 | 3 | 27 | Female | Negative | Negative | No | No | No | 2nd dose | Comirnaty (Biontech)     | Comirnaty (Biontech) | 23/7/2021 | 71  | None | None |
| C3.441 | 3 | 69 | Male   | Negative | Negative | No | No | No | 2nd dose | Comirnaty (Biontech)     | Comirnaty (Biontech) | 25/8/2021 | 38  | None | None |
| C3.442 | 3 | 37 | Male   | Negative | Negative | No | No | No | 1st dose | Comirnaty (Biontech)     |                      | 1/9/2021  | 31  | None | None |
| C3.443 | 3 | 33 | Female | Negative | Negative | No | No | No | 2nd dose | Comirnaty (Biontech)     | Comirnaty (Biontech) | N/A       | N/A | None | None |

|        |   |    |        |          |          |    |        |    |          |                          |                      |           |     |                 |         |
|--------|---|----|--------|----------|----------|----|--------|----|----------|--------------------------|----------------------|-----------|-----|-----------------|---------|
| C3.444 | 3 | 23 | Female | Negative | Negative | No | Yes    | No | 1st dose | Comirnaty (Biontech)     |                      | 2/6/2021  | 122 | Diabetes type 1 | Insulin |
| C3.445 | 3 | 29 | Male   | Negative | Negative | No | No     | No | 1st dose | Johnson & Johnson        |                      | 1/6/2021  | 123 | None            | None    |
| C3.446 | 3 | 27 | Female | Negative | Negative | No | No     | No | 2nd dose | Comirnaty (Biontech)     | Comirnaty (Biontech) | 3/5/2021  | 152 | None            | None    |
| C3.447 | 3 | 24 | Female | Negative | Negative | No | No     | No | 2nd dose | Comirnaty (Biontech)     | Comirnaty (Biontech) | 27/6/2021 | 97  | None            | None    |
| C3.448 | 3 | 30 | Male   | Negative | Negative | No | No     | No | 1st dose | Johnson & Johnson        |                      | 16/6/2021 | 108 | None            | None    |
| C3.449 | 3 | 30 | Female | Negative | Negative | No | No     | No | 1st dose | Johnson & Johnson        |                      | 2/6/2021  | 122 | None            | None    |
| C3.450 | 3 | 33 | Male   | Negative | Negative | No | No     | No | 2nd dose | Comirnaty (Biontech)     | Comirnaty (Biontech) | 21/8/2021 | 42  | None            | None    |
| C3.451 | 3 | 55 | Male   | Negative | Negative | No | Unsure | No | 2nd dose | Comirnaty (Biontech)     | Comirnaty (Biontech) | 26/6/2021 | 98  | None            | None    |
| C3.452 | 3 | 27 | Female | Negative | Negative | No | No     | No | 2nd dose | Comirnaty (Biontech)     | Comirnaty (Biontech) | 21/8/2021 | 42  | None            | None    |
| C3.453 | 3 | 52 | Female | Negative | Negative | No | No     | No | 2nd dose | Comirnaty (Biontech)     | Comirnaty (Biontech) | 26/6/2021 | 98  | None            | None    |
| C3.454 | 3 | 48 | Female | Negative | Negative | No | No     | No | 2nd dose | Comirnaty (Biontech)     | Comirnaty (Biontech) | 11/6/2021 | 113 | None            | None    |
| C3.455 | 3 | 44 | Female | Negative | Negative | No | No     | No | 1st dose | Johnson & Johnson        |                      | 11/6/2021 | 113 | None            | None    |
| C3.456 | 3 | 30 | Female | Negative | Negative | No | No     | No | 2nd dose | Comirnaty (Biontech)     | Comirnaty (Biontech) | 7/7/2021  | 87  | None            | None    |
| C3.457 | 3 | 24 | Male   | Negative | Negative | No | No     | No | 2nd dose | Comirnaty (Biontech)     | Comirnaty (Biontech) | 5/7/2021  | 89  | None            | None    |
| C3.458 | 3 | 49 | Male   | Negative | Negative | No | No     | No | 1st dose | Johnson & Johnson        |                      | 10/6/2021 | 114 | None            | None    |
| C3.459 | 3 | 40 | Male   | Negative | Negative | No | No     | No | 2nd dose | Comirnaty (Biontech)     | Comirnaty (Biontech) | 25/5/2021 | 130 | None            | None    |
| C3.460 | 3 | 53 | Female | Negative | Negative | No | No     | No | 2nd dose | Comirnaty (Biontech)     | Comirnaty (Biontech) | 14/8/2021 | 49  | None            | None    |
| C3.461 | 3 | 24 | Female | Negative | Negative | No | No     | No | 2nd dose | Comirnaty (Biontech)     | Comirnaty (Biontech) | N/A       | N/A | None            | None    |
| C3.462 | 3 | 26 | Female | Negative | Negative | No | No     | No | 2nd dose | Comirnaty (Biontech)     | Comirnaty (Biontech) | 26/6/2021 | 98  | None            | None    |
| C3.463 | 3 | 18 | Female | Negative | Negative | No | No     | No | 2nd dose | Comirnaty (Biontech)     | Comirnaty (Biontech) | 24/8/2021 | 39  | None            | None    |
| C3.464 | 3 | 25 | Female | Negative | Negative | No | No     | No | 2nd dose | Covid-19 (Moderna)       | Covid-19 (Moderna)   | 21/8/2021 | 42  | None            | None    |
| C3.465 | 3 | 34 | Female | Negative | Negative | No | No     | No | 2nd dose | Vaxzevria (Astra-Zeneca) | Comirnaty (Biontech) | 17/6/2021 | 107 | None            | None    |

|        |   |    |        |          |          |    |        |    |              |                          |                          |           |     |                                |                          |
|--------|---|----|--------|----------|----------|----|--------|----|--------------|--------------------------|--------------------------|-----------|-----|--------------------------------|--------------------------|
| C3.466 | 3 | 27 | Male   | Negative | Negative | No | No     | No | Unvaccinated |                          |                          |           |     | None                           | None                     |
| C3.467 | 3 | 23 | Male   | Negative | Negative | No | No     | No | 2nd dose     | Comirnaty (Biontech)     | Comirnaty (Biontech)     | 28/7/2021 | 66  | None                           | None                     |
| C3.468 | 3 | 39 | Male   | Negative | Negative | No | No     | No | 2nd dose     | Vaxzevria (Astra-Zeneca) | Comirnaty (Biontech)     | 27/5/2021 | 128 | None                           | None                     |
| C3.469 | 3 | 23 | Female | Negative | Negative | No | No     | No | Unvaccinated |                          |                          |           |     | None                           | None                     |
| C3.470 | 3 | 21 | Female | Negative | Negative | No | No     | No | 2nd dose     | Comirnaty (Biontech)     | Comirnaty (Biontech)     | 28/7/2021 | 66  | Hypertension, bronchial asthma | None                     |
| C3.471 | 3 | 54 | Female | Negative | Negative | No | No     | No | 2nd dose     | Comirnaty (Biontech)     | Comirnaty (Biontech)     | 14/7/2021 | 80  | None                           | None                     |
| C3.472 | 3 | 27 | Male   | Negative | Negative | No | No     | No | 2nd dose     | Comirnaty (Biontech)     | Comirnaty (Biontech)     | N/A       | N/A | None                           | None                     |
| C3.473 | 3 | 46 | Male   | Negative | Negative | No | No     | No | 2nd dose     | Comirnaty (Biontech)     | Comirnaty (Biontech)     | 21/9/2021 | 11  | None                           | None                     |
| C3.474 | 3 | 44 | Female | Negative | Negative | No | No     | No | 2nd dose     | Comirnaty (Biontech)     | Comirnaty (Biontech)     | 29/4/2021 | 156 | Hypertension                   | Bisoprolol               |
| C3.475 | 3 | 41 | Female | Negative | Negative | No | No     | No | 2nd dose     | Vaxzevria (Astra-Zeneca) | Vaxzevria (Astra-Zeneca) | 27/5/2021 | 128 | None                           | None                     |
| C3.476 | 3 | 36 | Female | Negative | Negative | No | No     | No | 2nd dose     | Comirnaty (Biontech)     | Comirnaty (Biontech)     | 28/7/2021 | 66  | None                           | None                     |
| C3.477 | 3 | 23 | Female | Negative | Negative | No | No     | No | 2nd dose     | Covid-19 (Moderna)       | Covid-19 (Moderna)       | 24/8/2021 | 39  | None                           | None                     |
| C3.478 | 3 | 38 | Female | Negative | Negative | No | No     | No | 2nd dose     | Covid-19 (Moderna)       | Covid-19 (Moderna)       | 9/8/2021  | 54  | None                           | None                     |
| C3.479 | 3 | 38 | Female | Negative | Negative | No | No     | No | 2nd dose     | Comirnaty (Biontech)     | Comirnaty (Biontech)     | 21/7/2021 | 73  | None                           | None                     |
| C3.480 | 3 | 33 | Female | Negative | Negative | No | No     | No | 2nd dose     | Comirnaty (Biontech)     | Comirnaty (Biontech)     | 8/6/2021  | 116 | None                           | None                     |
| C3.481 | 3 | 49 | Male   | Negative | Negative | No | No     | No | 2nd dose     | Comirnaty (Biontech)     | Comirnaty (Biontech)     | 20/6/2021 | 104 | Asthma                         | None                     |
| C3.482 | 3 | 53 | Female | Negative | Negative | No | No     | No | 2nd dose     | Comirnaty (Biontech)     | Comirnaty (Biontech)     | 21/5/2021 | 134 | None                           | None                     |
| C3.483 | 3 | 26 | Female | Negative | Negative | No | No     | No | 1st dose     | Johnson & Johnson        |                          | 8/8/2021  | 55  | None                           | None                     |
| C3.484 | 3 | 20 | Female | Negative | Negative | No | No     | No | 2nd dose     | Vaxzevria (Astra-Zeneca) | Vaxzevria (Astra-Zeneca) | 9/7/2021  | 85  | Hypertension                   | Ramipril                 |
| C3.485 | 3 | 35 | Male   | Negative | Negative | No | Unsure | No | 2nd dose     | Covid-19 (Moderna)       | Covid-19 (Moderna)       | 4/7/2021  | 90  | None                           | None                     |
| C3.486 | 3 | 28 | Female | Negative | Negative | No | No     | No | 2nd dose     | Comirnaty (Biontech)     | Comirnaty (Biontech)     | 1/7/2021  | 93  | Diabetes type 2                | Metformin, empagliflozin |

|        |   |    |        |          |          |    |        |    |              |                          |                          |           |     |              |             |
|--------|---|----|--------|----------|----------|----|--------|----|--------------|--------------------------|--------------------------|-----------|-----|--------------|-------------|
| C3.487 | 3 | 29 | Male   | Negative | Negative | No | No     | No | 2nd dose     | Vaxzevria (Astra-Zeneca) | Comirnaty (Biontech)     | 5/7/2021  | 89  | None         | None        |
| C3.488 | 3 | 29 | Female | Negative | Negative | No | Yes    | No | 1st dose     | Comirnaty (Biontech)     |                          | 28/7/2021 | 66  | None         | None        |
| C3.489 | 3 | 32 | Female | Negative | Negative | No | No     | No | 1st dose     | Comirnaty (Biontech)     |                          | 22/9/2021 | 10  | None         | None        |
| C3.490 | 3 | 24 | Female | Negative | Negative | No | No     | No | 2nd dose     | Comirnaty (Biontech)     | Comirnaty (Biontech)     | 8/7/2021  | 86  | None         | None        |
| C3.491 | 3 | 52 | Female | Negative | Negative | No | No     | No | 2nd dose     | Comirnaty (Biontech)     | Comirnaty (Biontech)     | 8/7/2021  | 86  | None         | None        |
| C3.492 | 3 | 28 | Female | Negative | Negative | No | Unsure | No | Unvaccinated |                          |                          |           |     | None         | None        |
| C3.493 | 3 | 55 | Female | Negative | Negative | No | No     | No | 2nd dose     | Comirnaty (Biontech)     | Comirnaty (Biontech)     | 4/6/2021  | 120 | None         | None        |
| C3.494 | 3 | 33 | Female | Negative | Negative | No | No     | No | 2nd dose     | Comirnaty (Biontech)     | Comirnaty (Biontech)     | 22/6/2021 | 102 | None         | None        |
| C3.495 | 3 | 51 | Female | Negative | Negative | No | No     | No | 2nd dose     | Comirnaty (Biontech)     | Comirnaty (Biontech)     | 20/7/2021 | 74  | None         | None        |
| C3.496 | 3 | 59 | Female | Negative | Negative | No | No     | No | 2nd dose     | Vaxzevria (Astra-Zeneca) | Vaxzevria (Astra-Zeneca) | 5/5/2021  | 150 | None         | None        |
| C3.497 | 3 | 63 | Female | Negative | Negative | No | No     | No | 2nd dose     | Comirnaty (Biontech)     | Comirnaty (Biontech)     | 21/5/2021 | 134 | Hypertension | Candesartan |
| C3.498 | 3 | 28 | Female | Negative | Negative | No | No     | No | 2nd dose     | Comirnaty (Biontech)     | Comirnaty (Biontech)     | 7/7/2021  | 87  | None         | None        |
| C3.499 | 3 | 21 | Female | Negative | Negative | No | No     | No | 2nd dose     | Comirnaty (Biontech)     | Comirnaty (Biontech)     | 7/7/2021  | 87  | None         | None        |
| C3.500 | 3 | 22 | Female | Negative | Negative | No | No     | No | 2nd dose     | Comirnaty (Biontech)     | Comirnaty (Biontech)     | 28/6/2021 | 96  | None         | None        |
| C3.501 | 3 | 47 | Male   | Negative | Negative | No | No     | No | 2nd dose     | Comirnaty (Biontech)     | Comirnaty (Biontech)     | 9/2/2021  | 235 | None         | None        |
| C3.502 | 3 | 48 | Female | Negative | Negative | No | No     | No | 2nd dose     | Comirnaty (Biontech)     | Comirnaty (Biontech)     | 11/5/2021 | 144 | None         | None        |
| C3.503 | 3 | 44 | Female | Negative | Negative | No | No     | No | 2nd dose     | Comirnaty (Biontech)     | Comirnaty (Biontech)     | 3/3/2021  | 213 | None         | None        |
| C3.504 | 3 | 23 | Female | Negative | Negative | No | No     | No | 2nd dose     | Covid-19 (Moderna)       | Covid-19 (Moderna)       | 31/5/2021 | 124 | None         | None        |
| C3.505 | 3 | 51 | Female | Negative | Negative | No | No     | No | 2nd dose     | Comirnaty (Biontech)     | Comirnaty (Biontech)     | 24/6/2021 | 100 | Asthma       | None        |
| C3.506 | 3 | 18 | Female | Negative | Negative | No | No     | No | 2nd dose     | Comirnaty (Biontech)     | Comirnaty (Biontech)     | 28/7/2021 | 66  | None         | None        |
| C3.507 | 3 | 57 | Female | Negative | Negative | No | No     | No | 2nd dose     | Vaxzevria (Astra-Zeneca) | Vaxzevria (Astra-Zeneca) | 28/5/2021 | 127 | None         | None        |

|        |   |    |        |          |          |    |    |    |          |                          |                      |           |     |                  |                          |
|--------|---|----|--------|----------|----------|----|----|----|----------|--------------------------|----------------------|-----------|-----|------------------|--------------------------|
| C3.508 | 3 | 48 | Male   | Negative | Negative | No | No | No | 2nd dose | Vaxzevria (Astra-Zeneca) | Comirnaty (Biontech) | 25/7/2021 | 69  | None             | None                     |
| C3.509 | 3 | 21 | Female | Negative | Negative | No | No | No | 2nd dose | Vaxzevria (Astra-Zeneca) | Comirnaty (Biontech) | 20/7/2021 | 74  | None             | None                     |
| C3.510 | 3 | 51 | Female | Negative | Negative | No | No | No | 2nd dose | Comirnaty (Biontech)     | Comirnaty (Biontech) | 21/6/2021 | 103 | None             | None                     |
| C3.511 | 3 | 50 | Female | Negative | Negative | No | No | No | 2nd dose | Comirnaty (Biontech)     | Comirnaty (Biontech) | 12/6/2021 | 112 | Hypertension     | Ramipril                 |
| C3.512 | 3 | 57 | Female | Negative | Negative | No | No | No | 2nd dose | Comirnaty (Biontech)     | Comirnaty (Biontech) | 10/6/2021 | 114 | Colon cancer     | Chemotherapy             |
| C3.513 | 3 | 48 | Male   | Negative | Negative | No | No | No | 1st dose | Johnson & Johnson        |                      | 7/6/2021  | 117 | None             | None                     |
| C3.514 | 3 | 48 | Female | Negative | Negative | No | No | No | 2nd dose | Comirnaty (Biontech)     | Comirnaty (Biontech) | 18/7/2021 | 76  | Hypertension     | Ramipril                 |
| C3.515 | 3 | 56 | Female | Negative | Negative | No | No | No | 2nd dose | Comirnaty (Biontech)     | Comirnaty (Biontech) | 22/7/2021 | 72  | Hypertension     | Metroprolol              |
| C3.516 | 3 | 54 | Female | Negative | Negative | No | No | No | 2nd dose | Comirnaty (Biontech)     | Comirnaty (Biontech) | 21/6/2021 | 103 | Thyroid disorder | L-thyroxine              |
| C3.517 | 3 | 41 | Male   | Negative | Negative | No | No | No | 1st dose | Johnson & Johnson        |                      | 3/9/2021  | 29  | None             | None                     |
| C3.518 | 3 | 28 | Female | Negative | Negative | No | No | No | 2nd dose | Covid-19 (Moderna)       | Covid-19 (Moderna)   | N/A       | N/A | None             | None                     |
| C3.519 | 3 | 28 | Male   | Negative | Negative | No | No | No | 2nd dose | Comirnaty (Biontech)     | Comirnaty (Biontech) | 5/6/2021  | 119 | None             | None                     |
| C3.520 | 3 | 34 | Female | Negative | Negative | No | No | No | 2nd dose | Comirnaty (Biontech)     | Comirnaty (Biontech) | 11/5/2021 | 144 | None             | None                     |
| C3.521 | 3 | 28 | Female | Negative | Negative | No | No | No | 2nd dose | Comirnaty (Biontech)     | Comirnaty (Biontech) | 26/6/2021 | 98  | Crohn's disease  | None                     |
| C3.522 | 3 | 31 | Male   | Negative | Negative | No | No | No | 2nd dose | Comirnaty (Biontech)     | Comirnaty (Biontech) | 15/6/2021 | 109 | None             | None                     |
| C3.523 | 3 | 28 | Female | Negative | Negative | No | No | No | 2nd dose | Comirnaty (Biontech)     | Comirnaty (Biontech) | 29/1/2021 | 246 | None             | None                     |
| C3.524 | 3 | 46 | Female | Negative | Negative | No | No | No | 1st dose | Johnson & Johnson        |                      | 9/6/2021  | 115 | None             | None                     |
| C3.525 | 3 | 52 | Male   | Negative | Negative | No | No | No | 2nd dose | Vaxzevria (Astra-Zeneca) | Comirnaty (Biontech) | 21/7/2021 | 73  | None             | None                     |
| C3.526 | 3 | 59 | Male   | Negative | Negative | No | No | No | 2nd dose | Comirnaty (Biontech)     | Comirnaty (Biontech) | 23/6/2021 | 101 | Hypertension     | Candesartan,nebio<br>lol |
| C3.527 | 3 | 26 | Female | Negative | Negative | No | No | No | 2nd dose | Covid-19 (Moderna)       | Covid-19 (Moderna)   | 27/7/2021 | 67  | None             | None                     |
| C3.528 | 3 | 38 | Male   | Negative | Negative | No | No | No | 2nd dose | Covid-19 (Moderna)       | Covid-19 (Moderna)   | 10/8/2021 | 53  | None             | None                     |

|        |   |    |        |          |          |    |    |    |          |                          |                      |           |     |                                                |                                     |
|--------|---|----|--------|----------|----------|----|----|----|----------|--------------------------|----------------------|-----------|-----|------------------------------------------------|-------------------------------------|
| C3.529 | 3 | 67 | Female | Negative | Negative | No | No | No | 2nd dose | Comirnaty (Biontech)     | Comirnaty (Biontech) | 26/5/2021 | 129 | Hypertension                                   | Antihypertensives                   |
| C3.530 | 3 | 67 | Male   | Negative | Negative | No | No | No | 2nd dose | Comirnaty (Biontech)     | Comirnaty (Biontech) | 28/5/2021 | 127 | Hypertension                                   | Antihypertensives                   |
| C3.531 | 3 | 50 | Female | Negative | Negative | No | No | No | 2nd dose | Comirnaty (Biontech)     | Comirnaty (Biontech) | 20/8/2021 | 43  | N/A                                            | Budesonide                          |
| C3.532 | 3 | 41 | Male   | Negative | Negative | No | No | No | 2nd dose | Comirnaty (Biontech)     | Comirnaty (Biontech) | 20/6/2021 | 104 | None                                           | None                                |
| C3.533 | 3 | 34 | Female | Negative | Negative | No | No | No | 2nd dose | Comirnaty (Biontech)     | Comirnaty (Biontech) | 20/6/2021 | 104 | None                                           | None                                |
| C3.534 | 3 | 22 | Female | Negative | Negative | No | No | No | 2nd dose | Covid-19 (Moderna)       | Covid-19 (Moderna)   | 20/7/2021 | 74  | None                                           | None                                |
| C3.535 | 3 | 22 | Female | Negative | Negative | No | No | No | 2nd dose | Johnson & Johnson        | Other vaccine        | 10/6/2021 | 114 | None                                           | None                                |
| C3.536 | 3 | 31 | Female | Negative | Negative | No | No | No | 2nd dose | Covid-19 (Moderna)       | Covid-19 (Moderna)   | 29/6/2021 | 95  | None                                           | None                                |
| C3.537 | 3 | 28 | Male   | Negative | Negative | No | No | No | 2nd dose | Comirnaty (Biontech)     | Comirnaty (Biontech) | 27/7/2021 | 67  | None                                           | None                                |
| C3.538 | 3 | 34 | Female | Negative | Negative | No | No | No | 2nd dose | Comirnaty (Biontech)     | Comirnaty (Biontech) | 12/8/2021 | 51  | None                                           | None                                |
| C3.539 | 3 | 29 | Female | Negative | Negative | No | No | No | 2nd dose | Comirnaty (Biontech)     | Comirnaty (Biontech) | 31/8/2021 | 32  | None                                           | None                                |
| C3.540 | 3 | 34 | Male   | Negative | Negative | No | No | No | 2nd dose | Comirnaty (Biontech)     | Comirnaty (Biontech) | 22/7/2021 | 72  | None                                           | None                                |
| C3.541 | 3 | 28 | Female | Negative | Negative | No | No | No | 2nd dose | Vaxzevria (Astra-Zeneca) | Covid-19 (Moderna)   | 17/6/2021 | 107 | None                                           | None                                |
| C3.542 | 3 | 20 | Female | Negative | Negative | No | No | No | 2nd dose | Comirnaty (Biontech)     | Comirnaty (Biontech) | N/A       | N/A | None                                           | None                                |
| C3.543 | 3 | 19 | Female | Negative | Negative | No | No | No | 1st dose | Johnson & Johnson        |                      | N/A       | N/A | None                                           | None                                |
| C3.544 | 3 | 63 | Female | Negative | Negative | No | No | No | 2nd dose | Comirnaty (Biontech)     | Comirnaty (Biontech) | 20/6/2021 | 104 | Hypertension, thyroid removal                  | Candesartan, l-thyroxine            |
| C3.545 | 3 | 18 | Female | Negative | Negative | No | No | No | 2nd dose | Vaxzevria (Astra-Zeneca) | Comirnaty (Biontech) | 15/6/2021 | 109 | Hypertension, asthma, neurodermatitis, allergy | Ramipril, formoterol+beclomethasone |
| C3.546 | 3 | 34 | Female | Negative | Negative | No | No | No | 2nd dose | Covid-19 (Moderna)       | Covid-19 (Moderna)   | 20/5/2021 | 135 | None                                           | None                                |
| C3.547 | 3 | 31 | Male   | Negative | Negative | No | No | No | 2nd dose | Comirnaty (Biontech)     | Comirnaty (Biontech) | 5/8/2021  | 58  | None                                           | None                                |
| C3.548 | 3 | 40 | Female | Negative | Negative | No | No | No | 2nd dose | Comirnaty (Biontech)     | Comirnaty (Biontech) | 9/6/2021  | 115 | Hashimoto, multiple sclerosis                  | L-thyroxine, teriflunomide          |
| C3.549 | 3 | 52 | Male   | Negative | Negative | No | No | No | 2nd dose | Comirnaty (Biontech)     | Comirnaty (Biontech) | 11/6/2021 | 113 | None                                           | None                                |

|        |   |    |        |          |          |    |     |    |              |                          |                      |           |     |                  |             |
|--------|---|----|--------|----------|----------|----|-----|----|--------------|--------------------------|----------------------|-----------|-----|------------------|-------------|
| C3.550 | 3 | 18 | Male   | Negative | Negative | No | No  | No | 2nd dose     | Vaxzevria (Astra-Zeneca) | Comirnaty (Biontech) | 2/7/2021  | 92  | None             | None        |
| C3.551 | 3 | 62 | Female | Negative | Negative | No | Yes | No | 1st dose     | Comirnaty (Biontech)     |                      | 19/5/2021 | 136 | None             | None        |
| C3.552 | 3 | 31 | Male   | Negative | Negative | No | No  | No | 2nd dose     | Comirnaty (Biontech)     | Comirnaty (Biontech) | 11/7/2021 | 83  | None             | None        |
| C3.553 | 3 | 29 | Female | Negative | Negative | No | No  | No | 2nd dose     | Covid-19 (Moderna)       | Covid-19 (Moderna)   | 28/5/2021 | 127 | None             | None        |
| C3.554 | 3 | 29 | Female | Negative | Negative | No | No  | No | 2nd dose     | Comirnaty (Biontech)     | Comirnaty (Biontech) | 19/5/2021 | 136 | None             | None        |
| C3.555 | 3 | 49 | Female | Negative | Negative | No | No  | No | 2nd dose     | Comirnaty (Biontech)     | Comirnaty (Biontech) | 21/6/2021 | 103 | None             | None        |
| C3.556 | 3 | 49 | Female | Negative | Negative | No | No  | No | Unvaccinated |                          |                      |           |     | None             | None        |
| C3.557 | 3 | 28 | Female | Negative | Negative | No | No  | No | 2nd dose     | Vaxzevria (Astra-Zeneca) | Comirnaty (Biontech) | 28/4/2021 | 157 | None             | None        |
| C3.558 | 3 | 60 | Female | Negative | Negative | No | No  | No | 2nd dose     | Johnson & Johnson        | Other vaccine        | 1/7/2021  | 93  | None             | None        |
| C3.559 | 3 | 21 | Female | Negative | Negative | No | No  | No | 2nd dose     | Comirnaty (Biontech)     | Comirnaty (Biontech) | 31/8/2021 | 32  | None             | None        |
| C3.560 | 3 | 23 | Female | Negative | Negative | No | No  | No | 2nd dose     | Vaxzevria (Astra-Zeneca) | Covid-19 (Moderna)   | 12/6/2021 | 112 | None             | None        |
| C3.561 | 3 | 24 | Male   | Negative | Negative | No | No  | No | 1st dose     | Johnson & Johnson        |                      | 9/6/2021  | 115 | None             | None        |
| C3.562 | 3 | 31 | Male   | Negative | Negative | No | No  | No | 2nd dose     | Covid-19 (Moderna)       | Covid-19 (Moderna)   | 7/8/2021  | 56  | None             | None        |
| C3.563 | 3 | 30 | Male   | Negative | Negative | No | No  | No | 2nd dose     | Comirnaty (Biontech)     | Comirnaty (Biontech) | 22/6/2021 | 102 | None             | None        |
| C3.564 | 3 | 31 | Female | Negative | Negative | No | No  | No | 2nd dose     | Comirnaty (Biontech)     | Comirnaty (Biontech) | 22/6/2021 | 102 | None             | None        |
| C3.565 | 3 | 51 | Female | Negative | Negative | No | No  | No | 2nd dose     | Vaxzevria (Astra-Zeneca) | Covid-19 (Moderna)   | 20/6/2021 | 104 | None             | None        |
| C3.566 | 3 | 53 | Male   | Negative | Negative | No | No  | No | 2nd dose     | Comirnaty (Biontech)     | Comirnaty (Biontech) | 27/7/2021 | 67  | None             | None        |
| C3.567 | 3 | 56 | Male   | Negative | Negative | No | No  | No | 2nd dose     | Comirnaty (Biontech)     | Comirnaty (Biontech) | 12/6/2021 | 112 | Thyroid disorder | L-thyroxine |
| C3.568 | 3 | 54 | Female | Negative | Negative | No | No  | No | 2nd dose     | Comirnaty (Biontech)     | Comirnaty (Biontech) | 12/6/2021 | 112 | None             | None        |
| C3.569 | 3 | 39 | Female | Negative | Negative | No | No  | No | 2nd dose     | Comirnaty (Biontech)     | Comirnaty (Biontech) | 25/6/2021 | 99  | None             | None        |
| C3.570 | 3 | 26 | Female | Negative | Negative | No | No  | No | 2nd dose     | Comirnaty (Biontech)     | Comirnaty (Biontech) | N/A       | N/A | None             | None        |

|        |   |    |        |          |          |    |     |    |              |                          |                      |           |     |                  |                   |
|--------|---|----|--------|----------|----------|----|-----|----|--------------|--------------------------|----------------------|-----------|-----|------------------|-------------------|
| C3.571 | 3 | 29 | Female | Negative | Negative | No | No  | No | 2nd dose     | Comirnaty (Biontech)     | Comirnaty (Biontech) | 9/6/2021  | 115 | Bronchial asthma | None              |
| C3.572 | 3 | 29 | Female | Negative | Negative | No | No  | No | 2nd dose     | Comirnaty (Biontech)     | Comirnaty (Biontech) | 14/7/2021 | 80  | None             | None              |
| C3.573 | 3 | 30 | Male   | Negative | Negative | No | No  | No | 2nd dose     | Comirnaty (Biontech)     | Comirnaty (Biontech) | 15/8/2021 | 48  | None             | None              |
| C3.574 | 3 | 29 | Male   | Negative | Negative | No | No  | No | 2nd dose     | Comirnaty (Biontech)     | Comirnaty (Biontech) | 28/6/2021 | 96  | None             | None              |
| C3.575 | 3 | 47 | Female | Negative | Negative | No | No  | No | 2nd dose     | Vaxzevria (Astra-Zeneca) | Comirnaty (Biontech) | 5/6/2021  | 119 | Hypothyroidism   | L-thyroxine       |
| C3.576 | 3 | 36 | Female | Negative | Negative | No | No  | No | 2nd dose     | Comirnaty (Biontech)     | Comirnaty (Biontech) | 11/6/2021 | 113 | None             | None              |
| C3.577 | 3 | 26 | Female | Negative | Negative | No | No  | No | 2nd dose     | Covid-19 (Moderna)       | Covid-19 (Moderna)   | 1/5/2021  | 154 | Asthma           | Asthma inhaler    |
| C3.578 | 3 | 25 | Female | Negative | Negative | No | No  | No | 2nd dose     | Comirnaty (Biontech)     | Comirnaty (Biontech) | 15/2/2021 | 229 | None             | None              |
| C3.579 | 3 | 57 | Female | Negative | Negative | No | No  | No | 2nd dose     | Comirnaty (Biontech)     | Comirnaty (Biontech) | 7/3/2021  | 209 | None             | None              |
| C3.580 | 3 | 30 | Male   | Negative | Negative | No | No  | No | 2nd dose     | Vaxzevria (Astra-Zeneca) | Comirnaty (Biontech) | 8/7/2021  | 86  | None             | None              |
| C3.581 | 3 | 30 | Female | Negative | Negative | No | No  | No | 2nd dose     | Comirnaty (Biontech)     | Comirnaty (Biontech) | 16/8/2021 | 47  | Hypothyroidism   | L-thyroxine       |
| C3.582 | 3 | 20 | Female | Negative | Negative | No | No  | No | 2nd dose     | Comirnaty (Biontech)     | Comirnaty (Biontech) | 21/7/2021 | 73  | None             | None              |
| C3.583 | 3 | 49 | Female | Negative | Negative | No | No  | No | 2nd dose     | Comirnaty (Biontech)     | Comirnaty (Biontech) | 16/6/2021 | 108 | Hypertension     | Antihypertensives |
| C3.584 | 3 | 25 | Female | Negative | Negative | No | No  | No | 2nd dose     | Comirnaty (Biontech)     | Comirnaty (Biontech) | 23/7/2021 | 71  | None             | None              |
| C3.585 | 3 | 36 | Female | Negative | Negative | No | Yes | No | 1st dose     | Comirnaty (Biontech)     |                      | 1/7/2021  | 93  | None             | None              |
| C3.586 | 3 | 24 | Female | Negative | Negative | No | No  | No | 2nd dose     | Comirnaty (Biontech)     | Comirnaty (Biontech) | 9/6/2021  | 115 | None             | None              |
| C3.587 | 3 | 18 | Female | Negative | Negative | No | No  | No | 2nd dose     | Comirnaty (Biontech)     | Comirnaty (Biontech) | 11/7/2021 | 83  | None             | None              |
| C3.588 | 3 | 18 | Female | Negative | Negative | No | No  | No | 2nd dose     | Comirnaty (Biontech)     | Comirnaty (Biontech) | 11/7/2021 | 83  | None             | None              |
| C3.589 | 3 | 29 | Female | Negative | Negative | No | No  | No | 2nd dose     | Covid-19 (Moderna)       | Covid-19 (Moderna)   | 19/7/2021 | 75  | None             | None              |
| C3.590 | 3 | 29 | Female | Negative | Negative | No | No  | No | 2nd dose     | Comirnaty (Biontech)     | Comirnaty (Biontech) | 13/7/2021 | 81  | None             | None              |
| C3.591 | 3 | 33 | Female | Negative | Negative | No | No  | No | 2nd dose     | Comirnaty (Biontech)     | Comirnaty (Biontech) | 10/6/2021 | 114 | None             | None              |
| C3.592 | 3 | 19 | Female | Negative | Negative | No | No  | No | Unvaccinated |                          |                      |           |     | None             | None              |



|        |   |    |        |          |          |    |     |    |          |                          |                          |           |     |                              |                         |
|--------|---|----|--------|----------|----------|----|-----|----|----------|--------------------------|--------------------------|-----------|-----|------------------------------|-------------------------|
| C3.593 | 3 | 54 | Female | Negative | Negative | No | No  | No | 2nd dose | Comirnaty (Biontech)     | Comirnaty (Biontech)     | 29/9/2021 | 3   | Hypertension, hypothyroidism | Bisoprolol, l-thyroxine |
| C3.594 | 3 | 37 | Male   | Negative | Negative | No | No  | No | 2nd dose | Vaxzevria (Astra-Zeneca) | Comirnaty (Biontech)     | 15/7/2021 | 79  | None                         | None                    |
| C3.595 | 3 | 36 | Male   | Negative | Negative | No | No  | No | 2nd dose | Comirnaty (Biontech)     | Comirnaty (Biontech)     | N/A       | N/A | None                         | None                    |
| C3.596 | 3 | 32 | Female | Negative | Negative | No | No  | No | 2nd dose | Comirnaty (Biontech)     | Comirnaty (Biontech)     | 15/7/2021 | 79  | None                         | None                    |
| C3.597 | 3 | 25 | Female | Negative | Negative | No | No  | No | 2nd dose | Comirnaty (Biontech)     | Comirnaty (Biontech)     | 8/7/2021  | 86  | None                         | None                    |
| C3.598 | 3 | 22 | Female | Negative | Negative | No | No  | No | 2nd dose | Vaxzevria (Astra-Zeneca) | Vaxzevria (Astra-Zeneca) | 28/6/2021 | 96  | None                         | None                    |
| C3.599 | 3 | 26 | Female | Negative | Negative | No | No  | No | 2nd dose | Covid-19 (Moderna)       | Covid-19 (Moderna)       | 18/5/2021 | 137 | Diabetes type 1, asthma      | Insulin, budesonide     |
| C3.600 | 3 | 51 | Male   | Negative | Negative | No | No  | No | 2nd dose | Comirnaty (Biontech)     | Comirnaty (Biontech)     | 15/8/2021 | 48  | None                         | None                    |
| C3.601 | 3 | 51 | Female | Negative | Negative | No | No  | No | 2nd dose | Comirnaty (Biontech)     | Comirnaty (Biontech)     | 23/6/2021 | 101 | Breast cancer                | Anastrozole             |
| C3.602 | 3 | 28 | Male   | Negative | Negative | No | No  | No | 2nd dose | Comirnaty (Biontech)     | Comirnaty (Biontech)     | 19/7/2021 | 75  | None                         | None                    |
| C3.603 | 3 | 21 | Female | Negative | Negative | No | Yes | No | 1st dose | Comirnaty (Biontech)     |                          | 3/8/2021  | 60  | None                         | None                    |
| C3.604 | 3 | 48 | Male   | Negative | Negative | No | No  | No | 2nd dose | Comirnaty (Biontech)     | Comirnaty (Biontech)     | N/A       | N/A | None                         | None                    |
| C3.605 | 3 | 21 | Male   | Negative | Negative | No | No  | No | 2nd dose | Vaxzevria (Astra-Zeneca) | Comirnaty (Biontech)     | 5/7/2021  | 89  | None                         | None                    |
| C3.606 | 3 | 29 | Male   | Negative | Negative | No | No  | No | 2nd dose | Comirnaty (Biontech)     | Comirnaty (Biontech)     | 20/7/2021 | 74  | None                         | None                    |
| C3.607 | 3 | 35 | Male   | Negative | Negative | No | No  | No | 2nd dose | Comirnaty (Biontech)     | Comirnaty (Biontech)     | 19/7/2021 | 75  | None                         | None                    |
| C3.608 | 3 | 36 | Female | Negative | Negative | No | No  | No | 2nd dose | Covid-19 (Moderna)       | Covid-19 (Moderna)       | 11/6/2021 | 113 | None                         | None                    |
| C3.609 | 3 | 21 | Female | Negative | Negative | No | No  | No | 2nd dose | Comirnaty (Biontech)     | Comirnaty (Biontech)     | 5/7/2021  | 89  | None                         | None                    |
| C3.610 | 3 | 51 | Female | Negative | Negative | No | No  | No | 2nd dose | Comirnaty (Biontech)     | Comirnaty (Biontech)     | 16/6/2021 | 108 | Hypertension, hypothyroidism | Metoprolol, l-thyroxine |
| C3.611 | 3 | 36 | Female | Negative | Negative | No | No  | No | 2nd dose | Comirnaty (Biontech)     | Comirnaty (Biontech)     | 26/7/2021 | 68  | None                         | None                    |
| C3.612 | 3 | 24 | Male   | Negative | Negative | No | No  | No | 2nd dose | Vaxzevria (Astra-Zeneca) | Comirnaty (Biontech)     | 30/6/2021 | 94  | None                         | None                    |

|        |   |    |        |          |          |    |        |    |              |                          |                      |           |     |                        |                                  |
|--------|---|----|--------|----------|----------|----|--------|----|--------------|--------------------------|----------------------|-----------|-----|------------------------|----------------------------------|
| C3.613 | 3 | 23 | Female | Negative | Negative | No | No     | No | 2nd dose     | Covid-19 (Moderna)       | Covid-19 (Moderna)   | 19/7/2021 | 75  | None                   | None                             |
| C3.614 | 3 | 24 | Female | Negative | Negative | No | No     | No | 2nd dose     | Comirnaty (Biontech)     | Comirnaty (Biontech) | 20/7/2021 | 74  | None                   | None                             |
| C3.615 | 3 | 39 | Male   | Negative | Negative | No | No     | No | 2nd dose     | Covid-19 (Moderna)       | Covid-19 (Moderna)   | 29/6/2021 | 95  | Diabetes type 2        | None                             |
| C3.616 | 3 | 41 | Female | Negative | Positive | No | Unsure | No | 2nd dose     | Comirnaty (Biontech)     | Comirnaty (Biontech) | 21/6/2021 | 103 | None                   | None                             |
| C3.617 | 3 | 69 | Female | Negative | Negative | No | No     | No | 2nd dose     | Comirnaty (Biontech)     | Comirnaty (Biontech) | 28/5/2021 | 127 | Thyroid disorder       | L-thyroxine                      |
| C3.618 | 3 | 28 | Male   | Negative | Negative | No | No     | No | 2nd dose     | Comirnaty (Biontech)     | Comirnaty (Biontech) | 13/7/2021 | 81  | None                   | None                             |
| C3.619 | 3 | 69 | Male   | Negative | Negative | No | No     | No | 2nd dose     | Comirnaty (Biontech)     | Comirnaty (Biontech) | 28/5/2021 | 127 | Cardiovasclar disorder | Ramipril, propranolol, primidone |
| C3.620 | 3 | 29 | Female | Negative | Negative | No | No     | No | 2nd dose     | Comirnaty (Biontech)     | Comirnaty (Biontech) | 10/8/2021 | 53  | None                   | None                             |
| C3.621 | 3 | 62 | Female | Negative | Negative | No | No     | No | 2nd dose     | Vaxzevria (Astra-Zeneca) | Covid-19 (Moderna)   | 25/7/2021 | 69  | None                   | None                             |
| C3.622 | 3 | 50 | Female | Negative | Negative | No | No     | No | 1st dose     | Johnson & Johnson        |                      | 9/6/2021  | 115 | None                   | None                             |
| C3.623 | 3 | 36 | Male   | Negative | Negative | No | No     | No | 2nd dose     | Comirnaty (Biontech)     | Comirnaty (Biontech) | 29/7/2021 | 65  | None                   | None                             |
| C3.624 | 3 | 51 | Male   | Negative | Negative | No | Unsure | No | Unvaccinated |                          |                      |           |     | None                   | None                             |
| C3.625 | 3 | 40 | Female | Negative | Negative | No | No     | No | Unvaccinated |                          |                      |           |     | None                   | None                             |
| C3.626 | 3 | 54 | Male   | Negative | Negative | No | No     | No | 2nd dose     | Comirnaty (Biontech)     | Comirnaty (Biontech) | 22/6/2021 | 102 | None                   | None                             |
| C3.627 | 3 | 40 | Female | Negative | Negative | No | No     | No | 2nd dose     | Comirnaty (Biontech)     | Comirnaty (Biontech) | 14/6/2021 | 110 | None                   | None                             |
| C3.628 | 3 | 57 | Female | Negative | Negative | No | No     | No | 2nd dose     | Comirnaty (Biontech)     | Comirnaty (Biontech) | 19/6/2021 | 105 | Asthma                 | None                             |
| C3.629 | 3 | 36 | Female | Negative | Negative | No | No     | No | 2nd dose     | Comirnaty (Biontech)     | Comirnaty (Biontech) | 16/6/2021 | 108 | None                   | None                             |
| C3.630 | 3 | 57 | Male   | Negative | Negative | No | No     | No | 2nd dose     | Comirnaty (Biontech)     | Comirnaty (Biontech) | 18/6/2021 | 106 | None                   | None                             |
| C3.631 | 3 | 37 | Female | Negative | Negative | No | No     | No | 2nd dose     | Comirnaty (Biontech)     | Comirnaty (Biontech) | 21/2/2021 | 223 | None                   | None                             |
| C3.632 | 3 | 38 | Female | Negative | Negative | No | No     | No | 2nd dose     | Comirnaty (Biontech)     | Comirnaty (Biontech) | 18/6/2021 | 106 | None                   | None                             |
| C3.633 | 3 | 53 | Female | Negative | Negative | No | No     | No | 2nd dose     | Comirnaty (Biontech)     | Comirnaty (Biontech) | 14/7/2021 | 80  | None                   | None                             |
| C3.634 | 3 | 38 | Male   | Negative | Negative | No | No     | No | Unvaccinated |                          |                      |           |     | None                   | None                             |

|        |   |     |        |          |          |    |     |     |          |                          |                      |           |     |                |                                 |
|--------|---|-----|--------|----------|----------|----|-----|-----|----------|--------------------------|----------------------|-----------|-----|----------------|---------------------------------|
| C3.635 | 3 | 38  | Female | Negative | Negative | No | No  | No  | 2nd dose | Vaxzevria (Astra-Zeneca) | Comirnaty (Biontech) | 4/5/2021  | 151 | Sicca syndrome | None                            |
| C3.636 | 3 | 29  | Male   | Negative | Negative | No | No  | No  | 1st dose | Johnson & Johnson        |                      | 31/5/2021 | 124 | None           | None                            |
| C3.637 | 3 | 33  | Male   | Negative | Negative | No | No  | No  | 2nd dose | Comirnaty (Biontech)     | Comirnaty (Biontech) | 1/9/2021  | 31  | None           | None                            |
| C3.638 | 3 | 34  | Male   | Negative | Negative | No | No  | No  | 2nd dose | Comirnaty (Biontech)     | Comirnaty (Biontech) | 21/2/2021 | 223 | HIV            | Dolutegravir+abacavir+lamivudin |
| C3.639 | 3 | 20  | Female | Negative | Negative | No | No  | No  | 2nd dose | Comirnaty (Biontech)     | Comirnaty (Biontech) | 8/7/2021  | 86  | None           | None                            |
| C3.640 | 3 | 47  | Male   | Negative | Negative | No | No  | No  | 2nd dose | Johnson & Johnson        | Other vaccine        | 25/5/2021 | 130 | None           | None                            |
| C3.641 | 3 | 25  | Male   | Negative | Negative | No | No  | No  | 2nd dose | Vaxzevria (Astra-Zeneca) | Comirnaty (Biontech) | 5/5/2021  | 150 | None           | None                            |
| C3.642 | 3 | 22  | Female | Negative | Negative | No | No  | No  | 2nd dose | Comirnaty (Biontech)     | Comirnaty (Biontech) | 26/6/2021 | 98  | None           | None                            |
| C3.643 | 3 | 28  | Male   | Negative | Negative | No | No  | No  | 2nd dose | Comirnaty (Biontech)     | Comirnaty (Biontech) | 22/7/2021 | 72  | None           | None                            |
| C3.644 | 3 | N/A | N/A    | Negative | Negative | No | N/A | N/A | N/A      | N/A                      | N/A                  | N/A       | N/A | N/A            | N/A                             |
| C3.645 | 3 | N/A | N/A    | Negative | Negative | No | N/A | N/A | N/A      | N/A                      | N/A                  | N/A       | N/A | N/A            | N/A                             |
| C3.646 | 3 | N/A | N/A    | Negative | Negative | No | N/A | N/A | N/A      | N/A                      | N/A                  | N/A       | N/A | N/A            | N/A                             |
| C3.647 | 3 | N/A | N/A    | Negative | Negative | No | N/A | N/A | N/A      | N/A                      | N/A                  | N/A       | N/A | N/A            | N/A                             |
| C3.648 | 3 | N/A | N/A    | Negative | Negative | No | N/A | N/A | N/A      | N/A                      | N/A                  | N/A       | N/A | N/A            | N/A                             |
| C3.649 | 3 | N/A | N/A    | Negative | Negative | No | N/A | N/A | N/A      | N/A                      | N/A                  | N/A       | N/A | N/A            | N/A                             |
| C3.650 | 3 | N/A | N/A    | Negative | Negative | No | N/A | N/A | N/A      | N/A                      | N/A                  | N/A       | N/A | N/A            | N/A                             |
| C3.651 | 3 | N/A | N/A    | Negative | Negative | No | N/A | N/A | N/A      | N/A                      | N/A                  | N/A       | N/A | N/A            | N/A                             |
| C3.652 | 3 | N/A | N/A    | Negative | Negative | No | N/A | N/A | N/A      | N/A                      | N/A                  | N/A       | N/A | N/A            | N/A                             |
| C3.653 | 3 | N/A | N/A    | Negative | Negative | No | N/A | N/A | N/A      | N/A                      | N/A                  | N/A       | N/A | N/A            | N/A                             |
| C3.654 | 3 | N/A | N/A    | Negative | Negative | No | N/A | N/A | N/A      | N/A                      | N/A                  | N/A       | N/A | N/A            | N/A                             |
| C3.655 | 3 | N/A | N/A    | Negative | Negative | No | N/A | N/A | N/A      | N/A                      | N/A                  | N/A       | N/A | N/A            | N/A                             |
| C3.656 | 3 | N/A | N/A    | Negative | Negative | No | N/A | N/A | N/A      | N/A                      | N/A                  | N/A       | N/A | N/A            | N/A                             |
| C3.657 | 3 | N/A | N/A    | Negative | Negative | No | N/A | N/A | N/A      | N/A                      | N/A                  | N/A       | N/A | N/A            | N/A                             |
| C3.658 | 3 | N/A | N/A    | Negative | Negative | No | N/A | N/A | N/A      | N/A                      | N/A                  | N/A       | N/A | N/A            | N/A                             |
| C3.659 | 3 | N/A | N/A    | Negative | Negative | No | N/A | N/A | N/A      | N/A                      | N/A                  | N/A       | N/A | N/A            | N/A                             |
| C3.660 | 3 | N/A | N/A    | Negative | Negative | No | N/A | N/A | N/A      | N/A                      | N/A                  | N/A       | N/A | N/A            | N/A                             |
| C3.661 | 3 | N/A | N/A    | Negative | Negative | No | N/A | N/A | N/A      | N/A                      | N/A                  | N/A       | N/A | N/A            | N/A                             |

|        |   |     |        |          |          |    |     |     |          |                          |                      |           |     |      |      |     |
|--------|---|-----|--------|----------|----------|----|-----|-----|----------|--------------------------|----------------------|-----------|-----|------|------|-----|
| C3.662 | 3 | N/A | N/A    | Negative | Negative | No | N/A | N/A | N/A      | N/A                      | N/A                  | N/A       | N/A | N/A  | N/A  | N/A |
| C3.663 | 3 | N/A | N/A    | Negative | Negative | No | N/A | N/A | N/A      | N/A                      | N/A                  | N/A       | N/A | N/A  | N/A  | N/A |
| C3.664 | 3 | N/A | N/A    | Negative | Negative | No | N/A | N/A | N/A      | N/A                      | N/A                  | N/A       | N/A | N/A  | N/A  | N/A |
| C3.665 | 3 | N/A | N/A    | Negative | Negative | No | N/A | N/A | N/A      | N/A                      | N/A                  | N/A       | N/A | N/A  | N/A  | N/A |
| C3.666 | 3 | N/A | N/A    | Negative | Negative | No | N/A | N/A | N/A      | N/A                      | N/A                  | N/A       | N/A | N/A  | N/A  | N/A |
| C3.667 | 3 | N/A | N/A    | Negative | Negative | No | N/A | N/A | N/A      | N/A                      | N/A                  | N/A       | N/A | N/A  | N/A  | N/A |
| C3.668 | 3 | N/A | N/A    | Negative | Negative | No | N/A | N/A | N/A      | N/A                      | N/A                  | N/A       | N/A | N/A  | N/A  | N/A |
| C3.669 | 3 | N/A | N/A    | Negative | Negative | No | N/A | N/A | N/A      | N/A                      | N/A                  | N/A       | N/A | N/A  | N/A  | N/A |
| C3.670 | 3 | N/A | N/A    | Negative | Negative | No | N/A | N/A | N/A      | N/A                      | N/A                  | N/A       | N/A | N/A  | N/A  | N/A |
| C3.671 | 3 | N/A | N/A    | Negative | Negative | No | N/A | N/A | N/A      | N/A                      | N/A                  | N/A       | N/A | N/A  | N/A  | N/A |
| C3.672 | 3 | N/A | N/A    | Negative | Negative | No | N/A | N/A | N/A      | N/A                      | N/A                  | N/A       | N/A | N/A  | N/A  | N/A |
| C3.673 | 3 | N/A | N/A    | Negative | Negative | No | N/A | N/A | N/A      | N/A                      | N/A                  | N/A       | N/A | N/A  | N/A  | N/A |
| C3.674 | 3 | N/A | N/A    | Negative | Negative | No | N/A | N/A | N/A      | N/A                      | N/A                  | N/A       | N/A | N/A  | N/A  | N/A |
| C3.675 | 3 | N/A | N/A    | Negative | Negative | No | N/A | N/A | N/A      | N/A                      | N/A                  | N/A       | N/A | N/A  | N/A  | N/A |
| C3.676 | 3 | N/A | N/A    | Negative | Negative | No | N/A | N/A | N/A      | N/A                      | N/A                  | N/A       | N/A | N/A  | N/A  | N/A |
| C3.677 | 3 | N/A | N/A    | Negative | Negative | No | N/A | N/A | N/A      | N/A                      | N/A                  | N/A       | N/A | N/A  | N/A  | N/A |
| C3.678 | 3 | N/A | N/A    | Negative | Negative | No | N/A | N/A | N/A      | N/A                      | N/A                  | N/A       | N/A | N/A  | N/A  | N/A |
| C4.1   | 4 | 35  | Male   | Negative | Negative | No | No  | No  | 1st dose | Johnson & Johnson        |                      | 4/6/2021  | 127 | None | None |     |
| C4.2   | 4 | 24  | Female | Negative | Negative | No | No  | No  | 1st dose | Comirnaty (Biontech)     |                      | 4/9/2021  | 35  | None | None |     |
| C4.3   | 4 | 31  | Female | Negative | Negative | No | No  | No  | 2nd dose | Comirnaty (Biontech)     | Comirnaty (Biontech) | 4/8/2021  | 66  | None | None |     |
| C4.4   | 4 | 29  | Male   | Negative | Negative | No | No  | No  | 2nd dose | Comirnaty (Biontech)     | Comirnaty (Biontech) | 23/6/2021 | 108 | None | None |     |
| C4.5   | 4 | 26  | Female | Negative | Negative | No | No  | No  | 2nd dose | Vaxzevria (Astra-Zeneca) | Covid-19 (Moderna)   | 18/6/2021 | 113 | None | None |     |
| C4.6   | 4 | 29  | Male   | Negative | Negative | No | No  | No  | 1st dose | Johnson & Johnson        |                      | 17/6/2021 | 114 | None | None |     |
| C4.7   | 4 | 29  | Male   | Negative | Negative | No | No  | No  | 2nd dose | Vaxzevria (Astra-Zeneca) | Comirnaty (Biontech) | 15/7/2021 | 86  | None | None |     |
| C4.8   | 4 | 24  | Male   | Negative | Negative | No | Yes | No  | 1st dose | Vaxzevria (Astra-Zeneca) |                      | 27/5/2021 | 135 | None | None |     |
| C4.9   | 4 | 23  | Female | Negative | Negative | No | No  | No  | 2nd dose | Vaxzevria (Astra-Zeneca) | Comirnaty (Biontech) | 22/5/2021 | 140 | None | None |     |

|       |   |    |        |          |          |    |        |    |              |                          |                      |           |     |      |      |
|-------|---|----|--------|----------|----------|----|--------|----|--------------|--------------------------|----------------------|-----------|-----|------|------|
| C4.10 | 4 | 40 | Female | Negative | Negative | No | No     | No | 1st dose     | Johnson & Johnson        |                      | 2/6/2021  | 129 | None | None |
| C4.11 | 4 | 20 | Female | Negative | Negative | No | No     | No | 2nd dose     | Comirnaty (Biontech)     | Comirnaty (Biontech) | 22/2/2021 | 229 | None | None |
| C4.12 | 4 | 28 | Female | Negative | Negative | No | No     | No | 2nd dose     | Vaxzevria (Astra-Zeneca) | Comirnaty (Biontech) | 14/5/2021 | 148 | None | None |
| C4.13 | 4 | 29 | Female | Negative | Negative | No | No     | No | 2nd dose     | Comirnaty (Biontech)     | Comirnaty (Biontech) | 7/7/2021  | 94  | None | None |
| C4.14 | 4 | 24 | Male   | Negative | Negative | No | No     | No | 2nd dose     | Comirnaty (Biontech)     | Comirnaty (Biontech) | 12/7/2021 | 89  | None | None |
| C4.15 | 4 | 24 | Female | Negative | Negative | No | No     | No | 2nd dose     | Covid-19 (Moderna)       | Comirnaty (Biontech) | N/A       | N/A | None | None |
| C4.16 | 4 | 23 | Male   | Negative | Negative | No | No     | No | 2nd dose     | Vaxzevria (Astra-Zeneca) | Comirnaty (Biontech) | 19/5/2021 | 143 | None | None |
| C4.17 | 4 | 25 | Male   | Negative | Negative | No | No     | No | 2nd dose     | Vaxzevria (Astra-Zeneca) | Comirnaty (Biontech) | 24/6/2021 | 107 | None | None |
| C4.18 | 4 | 22 | Male   | Negative | Negative | No | No     | No | 2nd dose     | Covid-19 (Moderna)       | Covid-19 (Moderna)   | 8/4/2021  | 184 | None | None |
| C4.19 | 4 | 36 | Female | Negative | Negative | No | Unsure | No | Unvaccinated |                          |                      |           |     | None | None |
| C4.20 | 4 | 41 | Female | Negative | Negative | No | No     | No | Unvaccinated |                          |                      |           |     | None | None |
| C4.21 | 4 | 40 | Male   | Negative | Negative | No | No     | No | Unvaccinated |                          |                      |           |     | None | None |
| C4.22 | 4 | 25 | Female | Negative | Negative | No | No     | No | 2nd dose     | Covid-19 (Moderna)       | Covid-19 (Moderna)   | 27/7/2021 | 74  | None | None |
| C4.23 | 4 | 40 | Male   | Negative | Negative | No | No     | No | Unvaccinated |                          |                      |           |     | None | None |
| C4.24 | 4 | 35 | Female | Negative | Negative | No | No     | No | 2nd dose     | Comirnaty (Biontech)     | Comirnaty (Biontech) | 9/6/2021  | 122 | None | None |
| C4.25 | 4 | 22 | Female | Negative | Negative | No | No     | No | 2nd dose     | Comirnaty (Biontech)     | Comirnaty (Biontech) | 21/7/2021 | 80  | None | None |
| C4.26 | 4 | 18 | Male   | Negative | Negative | No | No     | No | 2nd dose     | Comirnaty (Biontech)     | Comirnaty (Biontech) | 8/7/2021  | 93  | None | None |
| C4.27 | 4 | 61 | Female | Negative | Negative | No | No     | No | 2nd dose     | Vaxzevria (Astra-Zeneca) | Comirnaty (Biontech) | 8/7/2021  | 93  | None | None |
| C4.28 | 4 | 19 | Female | Negative | Negative | No | No     | No | 2nd dose     | Comirnaty (Biontech)     | Comirnaty (Biontech) | 16/6/2021 | 115 | None | None |
| C4.29 | 4 | 27 | Male   | Negative | Negative | No | No     | No | 2nd dose     | Covid-19 (Moderna)       | Covid-19 (Moderna)   | 9/8/2021  | 61  | None | None |
| C4.30 | 4 | 22 | Female | Negative | Negative | No | No     | No | 2nd dose     | Comirnaty (Biontech)     | Comirnaty (Biontech) | 9/7/2021  | 92  | None | None |

|       |   |    |        |          |          |    |     |    |              |                          |                          |           |     |      |      |
|-------|---|----|--------|----------|----------|----|-----|----|--------------|--------------------------|--------------------------|-----------|-----|------|------|
| C4.31 | 4 | 25 | Male   | Negative | Negative | No | No  | No | 2nd dose     | Vaxzevria (Astra-Zeneca) | Comirnaty (Biontech)     | 22/6/2021 | 109 | None | None |
| C4.32 | 4 | 23 | Female | Negative | Negative | No | No  | No | Unvaccinated |                          |                          |           |     | None | None |
| C4.33 | 4 | 32 | Male   | Negative | Negative | No | No  | No | 2nd dose     | Comirnaty (Biontech)     | Comirnaty (Biontech)     | 17/6/2021 | 114 | None | None |
| C4.34 | 4 | 18 | Female | Negative | Negative | No | No  | No | 2nd dose     | Comirnaty (Biontech)     | Comirnaty (Biontech)     | 21/7/2021 | 80  | None | None |
| C4.35 | 4 | 36 | Female | Negative | Negative | No | No  | No | 2nd dose     | Comirnaty (Biontech)     | Comirnaty (Biontech)     | 24/5/2021 | 138 | None | None |
| C4.36 | 4 | 42 | Female | Negative | Negative | No | No  | No | 2nd dose     | Comirnaty (Biontech)     | Comirnaty (Biontech)     | 16/7/2021 | 85  | None | None |
| C4.37 | 4 | 27 | Male   | Negative | Negative | No | No  | No | 2nd dose     | Covid-19 (Moderna)       | Covid-19 (Moderna)       | 26/5/2021 | 136 | None | None |
| C4.38 | 4 | 22 | Female | Negative | Negative | No | No  | No | 2nd dose     | Vaxzevria (Astra-Zeneca) | Comirnaty (Biontech)     | 9/7/2021  | 92  | None | None |
| C4.39 | 4 | 30 | Female | Negative | Negative | No | No  | No | 1st dose     | Johnson & Johnson        |                          | 1/5/2021  | 161 | None | None |
| C4.40 | 4 | 32 | Male   | Negative | Negative | No | No  | No | 2nd dose     | Vaxzevria (Astra-Zeneca) | Vaxzevria (Astra-Zeneca) | 21/6/2021 | 110 | None | None |
| C4.41 | 4 | 18 | Female | Negative | Negative | No | No  | No | 2nd dose     | Covid-19 (Moderna)       | Covid-19 (Moderna)       | 15/9/2021 | 24  | None | None |
| C4.42 | 4 | 46 | Male   | Negative | Negative | No | No  | No | 2nd dose     | Comirnaty (Biontech)     | Comirnaty (Biontech)     | 16/2/2021 | 235 | None | None |
| C4.43 | 4 | 20 | Male   | Negative | Negative | No | No  | No | 2nd dose     | Vaxzevria (Astra-Zeneca) | Comirnaty (Biontech)     | 13/7/2021 | 88  | None | None |
| C4.44 | 4 | 37 | Male   | Negative | Negative | No | Yes | No | 1st dose     | Comirnaty (Biontech)     |                          | 14/7/2021 | 87  | None | None |
| C4.45 | 4 | 37 | Male   | Negative | Negative | No | No  | No | 2nd dose     | Comirnaty (Biontech)     | Comirnaty (Biontech)     | 8/6/2021  | 123 | None | None |
| C4.46 | 4 | 21 | Female | Negative | Negative | No | No  | No | 2nd dose     | Comirnaty (Biontech)     | Comirnaty (Biontech)     | 22/7/2021 | 79  | None | None |
| C4.47 | 4 | 24 | Female | Negative | Negative | No | No  | No | 2nd dose     | Comirnaty (Biontech)     | Comirnaty (Biontech)     | 9/6/2021  | 122 | None | None |
| C4.48 | 4 | 21 | Female | Negative | Negative | No | No  | No | 2nd dose     | Comirnaty (Biontech)     | Comirnaty (Biontech)     | 3/8/2021  | 67  | None | None |
| C4.49 | 4 | 27 | Male   | Negative | Negative | No | No  | No | 2nd dose     | Vaxzevria (Astra-Zeneca) | Comirnaty (Biontech)     | 30/8/2021 | 40  | None | None |
| C4.50 | 4 | 33 | Male   | Negative | Negative | No | No  | No | 2nd dose     | Vaxzevria (Astra-Zeneca) | Comirnaty (Biontech)     | 10/8/2021 | 60  | None | None |

|       |   |    |        |          |          |    |        |    |          |                          |                      |           |     |                                                       |             |
|-------|---|----|--------|----------|----------|----|--------|----|----------|--------------------------|----------------------|-----------|-----|-------------------------------------------------------|-------------|
| C4.51 | 4 | 24 | Female | Negative | Negative | No | No     | No | 2nd dose | Comirnaty (Biontech)     | Comirnaty (Biontech) | 15/6/2021 | 116 | None                                                  | None        |
| C4.52 | 4 | 31 | Male   | Negative | Negative | No | No     | No | 2nd dose | Vaxzevria (Astra-Zeneca) | Comirnaty (Biontech) | 13/7/2021 | 88  | None                                                  | None        |
| C4.53 | 4 | 27 | Female | Negative | Negative | No | No     | No | 2nd dose | Comirnaty (Biontech)     | Comirnaty (Biontech) | 28/7/2021 | 73  | None                                                  | None        |
| C4.54 | 4 | 43 | Female | Negative | Negative | No | No     | No | 2nd dose | Comirnaty (Biontech)     | Comirnaty (Biontech) | 6/2/2021  | 245 | Hypothyroidism                                        | L-thyroxine |
| C4.55 | 4 | 24 | Female | Negative | Negative | No | No     | No | 2nd dose | Vaxzevria (Astra-Zeneca) | Covid-19 (Moderna)   | 18/6/2021 | 113 | Hypertension                                          | Ramipril    |
| C4.56 | 4 | 26 | Female | Negative | Negative | No | Unsure | No | 2nd dose | Comirnaty (Biontech)     | Comirnaty (Biontech) | 1/6/2021  | 130 | Hypertension, hidradenitis suppurative (acne inversa) | Candesartan |
| C4.57 | 4 | 28 | Male   | Negative | Negative | No | No     | No | 1st dose | Johnson & Johnson        |                      | 17/6/2021 | 114 | None                                                  | None        |
| C4.58 | 4 | 44 | Female | Negative | Negative | No | No     | No | 2nd dose | Vaxzevria (Astra-Zeneca) | Comirnaty (Biontech) | 15/7/2021 | 86  | None                                                  | None        |
| C4.59 | 4 | 34 | Female | Negative | Negative | No | No     | No | 2nd dose | Vaxzevria (Astra-Zeneca) | Comirnaty (Biontech) | 11/5/2021 | 151 | None                                                  | None        |
| C4.60 | 4 | 28 | Male   | Negative | Negative | No | Yes    | No | 1st dose | Covid-19 (Moderna)       |                      | 16/9/2021 | 23  | None                                                  | None        |
| C4.61 | 4 | 36 | Male   | Negative | Negative | No | No     | No | 2nd dose | Comirnaty (Biontech)     | Comirnaty (Biontech) | 27/7/2021 | 74  | Crohn's disease                                       | None        |
| C4.62 | 4 | 24 | Male   | Negative | Negative | No | No     | No | 2nd dose | Comirnaty (Biontech)     | Comirnaty (Biontech) | 20/6/2021 | 111 | None                                                  | None        |
| C4.63 | 4 | 27 | Female | Negative | Negative | No | No     | No | 2nd dose | Covid-19 (Moderna)       | Covid-19 (Moderna)   | 30/4/2021 | 162 | None                                                  | None        |
| C4.64 | 4 | 30 | Female | Negative | Negative | No | No     | No | 2nd dose | Comirnaty (Biontech)     | Comirnaty (Biontech) | 24/9/2021 | 15  | None                                                  | None        |
| C4.65 | 4 | 28 | Female | Negative | Negative | No | No     | No | 2nd dose | Covid-19 (Moderna)       | Covid-19 (Moderna)   | 5/6/2021  | 126 | None                                                  | None        |
| C4.66 | 4 | 29 | Female | Negative | Negative | No | No     | No | 2nd dose | Comirnaty (Biontech)     | Comirnaty (Biontech) | 15/6/2021 | 116 | None                                                  | None        |
| C4.67 | 4 | 28 | Male   | Negative | Negative | No | Yes    | No | 1st dose | Johnson & Johnson        |                      | 3/6/2021  | 128 | None                                                  | None        |
| C4.68 | 4 | 23 | Male   | Negative | Negative | No | No     | No | 2nd dose | Vaxzevria (Astra-Zeneca) | Comirnaty (Biontech) | 28/7/2021 | 73  | None                                                  | None        |

|       |   |    |        |          |          |    |        |    |          |                          |                      |           |     |      |      |
|-------|---|----|--------|----------|----------|----|--------|----|----------|--------------------------|----------------------|-----------|-----|------|------|
| C4.69 | 4 | 24 | Female | Negative | Negative | No | No     | No | 2nd dose | Vaxzevria (Astra-Zeneca) | Covid-19 (Moderna)   | 9/6/2021  | 122 | None | None |
| C4.70 | 4 | 24 | Male   | Negative | Negative | No | No     | No | 2nd dose | Vaxzevria (Astra-Zeneca) | Comirnaty (Biontech) | 5/6/2021  | 126 | None | None |
| C4.71 | 4 | 29 | Male   | Negative | Negative | No | No     | No | 2nd dose | Vaxzevria (Astra-Zeneca) | Covid-19 (Moderna)   | 11/9/2021 | 28  | None | None |
| C4.72 | 4 | 23 | Female | Negative | Negative | No | No     | No | 2nd dose | Covid-19 (Moderna)       | Covid-19 (Moderna)   | 27/7/2021 | 74  | None | None |
| C4.73 | 4 | 29 | Male   | Negative | Negative | No | Unsure | No | 2nd dose | Comirnaty (Biontech)     | Comirnaty (Biontech) | 24/9/2021 | 15  | None | None |
| C4.74 | 4 | 38 | Female | Negative | Negative | No | Yes    | No | 1st dose | Comirnaty (Biontech)     |                      | 14/9/2021 | 25  | None | None |
| C4.75 | 4 | 24 | Female | Negative | Negative | No | No     | No | 2nd dose | Covid-19 (Moderna)       | Covid-19 (Moderna)   | 7/7/2021  | 94  | None | None |
| C4.76 | 4 | 20 | Male   | Negative | Negative | No | No     | No | 2nd dose | Comirnaty (Biontech)     | Comirnaty (Biontech) | 18/6/2021 | 113 | None | None |
| C4.77 | 4 | 25 | Male   | Negative | Negative | No | No     | No | 2nd dose | Comirnaty (Biontech)     | Comirnaty (Biontech) | 9/7/2021  | 92  | None | None |
| C4.78 | 4 | 23 | Male   | Negative | Negative | No | No     | No | 2nd dose | Vaxzevria (Astra-Zeneca) | Comirnaty (Biontech) | 2/8/2021  | 68  | None | None |
| C4.79 | 4 | 22 | Male   | Negative | Negative | No | No     | No | 2nd dose | Comirnaty (Biontech)     | Comirnaty (Biontech) | 15/7/2021 | 86  | None | None |
| C4.80 | 4 | 22 | Male   | Negative | Negative | No | No     | No | 2nd dose | Vaxzevria (Astra-Zeneca) | Comirnaty (Biontech) | 2/8/2021  | 68  | None | None |
| C4.81 | 4 | 19 | Male   | Negative | Negative | No | No     | No | 2nd dose | Comirnaty (Biontech)     | Comirnaty (Biontech) | 20/7/2021 | 81  | None | None |
| C4.82 | 4 | 26 | Female | Negative | Negative | No | No     | No | 2nd dose | Covid-19 (Moderna)       | Covid-19 (Moderna)   | 19/7/2021 | 82  | None | None |
| C4.83 | 4 | 24 | Female | Negative | Negative | No | No     | No | 2nd dose | Covid-19 (Moderna)       | Covid-19 (Moderna)   | 19/7/2021 | 82  | None | None |
| C4.84 | 4 | 31 | Female | Negative | Negative | No | No     | No | 2nd dose | Comirnaty (Biontech)     | Comirnaty (Biontech) | 4/9/2021  | 35  | None | None |
| C4.85 | 4 | 22 | Male   | Negative | Negative | No | Yes    | No | 2nd dose | Comirnaty (Biontech)     | Comirnaty (Biontech) | 30/7/2021 | 71  | None | None |
| C4.86 | 4 | 34 | Female | Negative | Negative | No | No     | No | 2nd dose | Covid-19 (Moderna)       | Covid-19 (Moderna)   | 13/5/2021 | 149 | None | None |
| C4.87 | 4 | 24 | Female | Negative | Negative | No | No     | No | 2nd dose | Comirnaty (Biontech)     | Comirnaty (Biontech) | 20/7/2021 | 81  | None | None |
| C4.88 | 4 | 18 | Female | Negative | Negative | No | No     | No | 2nd dose | Covid-19 (Moderna)       | Covid-19 (Moderna)   | 26/7/2021 | 75  | None | None |



|        |   |    |        |          |          |    |        |    |          |                          |                      |           |     |                                |                         |
|--------|---|----|--------|----------|----------|----|--------|----|----------|--------------------------|----------------------|-----------|-----|--------------------------------|-------------------------|
| C4.89  | 4 | 42 | Female | Negative | Negative | No | No     | No | 2nd dose | Comirnaty (Biontech)     | Comirnaty (Biontech) | 29/6/2021 | 102 | Hypertension                   | Olmesartan              |
| C4.90  | 4 | 18 | Female | Negative | Negative | No | No     | No | 1st dose | Johnson & Johnson        |                      | 25/5/2021 | 137 | None                           | None                    |
| C4.91  | 4 | 25 | Female | Negative | Negative | No | No     | No | 2nd dose | Comirnaty (Biontech)     | Comirnaty (Biontech) | 20/6/2021 | 111 | None                           | None                    |
| C4.92  | 4 | 23 | Female | Negative | Negative | No | No     | No | 2nd dose | Covid-19 (Moderna)       | Covid-19 (Moderna)   | 13/7/2021 | 88  | None                           | None                    |
| C4.93  | 4 | 24 | Female | Negative | Negative | No | No     | No | 2nd dose | Comirnaty (Biontech)     | Comirnaty (Biontech) | 21/5/2021 | 141 | None                           | None                    |
| C4.94  | 4 | 23 | Female | Negative | Negative | No | No     | No | 2nd dose | Comirnaty (Biontech)     | Comirnaty (Biontech) | 21/6/2021 | 110 | None                           | None                    |
| C4.95  | 4 | 30 | Male   | Negative | Negative | No | No     | No | 2nd dose | Comirnaty (Biontech)     | Comirnaty (Biontech) | 17/7/2021 | 84  | Thyroid disorder               | L-thyroxine             |
| C4.96  | 4 | 53 | Female | Negative | Negative | No | No     | No | 2nd dose | Comirnaty (Biontech)     | Comirnaty (Biontech) | 26/6/2021 | 105 | Asthma                         | Formoterol+budesonide   |
| C4.97  | 4 | 45 | Female | Negative | Negative | No | No     | No | 2nd dose | Comirnaty (Biontech)     | Comirnaty (Biontech) | 7/7/2021  | 94  | Hypertension, thyroid disorder | L-thyroxine, bisoprolol |
| C4.98  | 4 | 31 | Female | Negative | Negative | No | No     | No | 2nd dose | Vaxzevria (Astra-Zeneca) | Comirnaty (Biontech) | 13/5/2021 | 149 | None                           | None                    |
| C4.99  | 4 | 31 | Male   | Negative | Negative | No | No     | No | 2nd dose | Comirnaty (Biontech)     | Comirnaty (Biontech) | 5/8/2021  | 65  | None                           | None                    |
| C4.100 | 4 | 20 | Male   | Negative | Negative | No | No     | No | 2nd dose | Comirnaty (Biontech)     | Comirnaty (Biontech) | 26/5/2021 | 136 | None                           | None                    |
| C4.101 | 4 | 23 | Female | Negative | Negative | No | No     | No | 2nd dose | Covid-19 (Moderna)       | Covid-19 (Moderna)   | 27/7/2021 | 74  | None                           | None                    |
| C4.102 | 4 | 22 | Female | Negative | Negative | No | No     | No | 2nd dose | Covid-19 (Moderna)       | Covid-19 (Moderna)   | 7/8/2021  | 63  | None                           | None                    |
| C4.103 | 4 | 26 | Female | Negative | Negative | No | Unsure | No | 2nd dose | Covid-19 (Moderna)       | Covid-19 (Moderna)   | 9/7/2021  | 92  | None                           | None                    |
| C4.104 | 4 | 41 | Male   | Negative | Negative | No | No     | No | 1st dose | Johnson & Johnson        |                      | 3/9/2021  | 36  | None                           | None                    |
| C4.105 | 4 | 23 | Male   | Negative | Negative | No | No     | No | 2nd dose | Comirnaty (Biontech)     | Comirnaty (Biontech) | 19/6/2021 | 112 | None                           | None                    |
| C4.106 | 4 | 24 | Male   | Negative | Negative | No | No     | No | 2nd dose | Comirnaty (Biontech)     | Comirnaty (Biontech) | 29/7/2021 | 72  | None                           | None                    |
| C4.107 | 4 | 19 | Female | Negative | Negative | No | No     | No | 2nd dose | Comirnaty (Biontech)     | Comirnaty (Biontech) | 6/7/2021  | 95  | None                           | None                    |
| C4.108 | 4 | 40 | Female | Negative | Negative | No | Yes    | No | 1st dose | Comirnaty (Biontech)     |                      | 12/5/2021 | 150 | Asthma                         | Asthma inhaler          |
| C4.109 | 4 | 53 | Female | Negative | Negative | No | No     | No | 2nd dose | Vaxzevria (Astra-Zeneca) | Comirnaty (Biontech) | 2/5/2021  | 160 | None                           | None                    |

|        |   |    |        |          |          |    |        |    |          |                          |                      |           |     |      |                 |
|--------|---|----|--------|----------|----------|----|--------|----|----------|--------------------------|----------------------|-----------|-----|------|-----------------|
| C4.110 | 4 | 27 | Male   | Negative | Negative | No | No     | No | 2nd dose | Covid-19 (Moderna)       | Covid-19 (Moderna)   | 19/7/2021 | 82  | None | None            |
| C4.111 | 4 | 33 | Male   | Negative | Negative | No | No     | No | 2nd dose | Comirnaty (Biontech)     | Comirnaty (Biontech) | 13/7/2021 | 88  | None | None            |
| C4.112 | 4 | 35 | Female | Negative | Negative | No | No     | No | 2nd dose | Vaxzevria (Astra-Zeneca) | Comirnaty (Biontech) | 6/6/2021  | 125 | None | None            |
| C4.113 | 4 | 24 | Female | Negative | Negative | No | No     | No | 2nd dose | Comirnaty (Biontech)     | Comirnaty (Biontech) | 8/7/2021  | 93  | None | None            |
| C4.114 | 4 | 30 | Male   | Negative | Negative | No | No     | No | 2nd dose | Comirnaty (Biontech)     | Comirnaty (Biontech) | 26/7/2021 | 75  | None | None            |
| C4.115 | 4 | 22 | Female | Negative | Negative | No | No     | No | 1st dose | Johnson & Johnson        |                      | 8/8/2021  | 62  | None | None            |
| C4.116 | 4 | 35 | Male   | Negative | Negative | No | No     | No | 2nd dose | Comirnaty (Biontech)     | Comirnaty (Biontech) | 26/6/2021 | 105 | None | None            |
| C4.117 | 4 | 32 | Female | Negative | Negative | No | No     | No | 2nd dose | Comirnaty (Biontech)     | Comirnaty (Biontech) | 10/8/2021 | 60  | N/A  | Methylphenidate |
| C4.118 | 4 | 25 | Male   | Negative | Negative | No | No     | No | 2nd dose | Comirnaty (Biontech)     | Comirnaty (Biontech) | 13/8/2021 | 57  | None | None            |
| C4.119 | 4 | 18 | Female | Negative | Negative | No | No     | No | 2nd dose | Comirnaty (Biontech)     | Comirnaty (Biontech) | 27/9/2021 | 12  | None | None            |
| C4.120 | 4 | 19 | Male   | Negative | Negative | No | No     | No | 1st dose | Johnson & Johnson        |                      | 24/6/2021 | 107 | None | None            |
| C4.121 | 4 | 28 | Male   | Negative | Negative | No | No     | No | 2nd dose | Comirnaty (Biontech)     | Comirnaty (Biontech) | 7/10/2021 | 2   | None | None            |
| C4.122 | 4 | 21 | Male   | Negative | Negative | No | No     | No | 2nd dose | Comirnaty (Biontech)     | Comirnaty (Biontech) | 7/7/2021  | 94  | None | None            |
| C4.123 | 4 | 19 | Female | Negative | Negative | No | Yes    | No | 1st dose | Comirnaty (Biontech)     |                      | 14/6/2021 | 117 | None | None            |
| C4.124 | 4 | 33 | Male   | Negative | Negative | No | No     | No | 1st dose | Johnson & Johnson        |                      | 18/7/2021 | 83  | None | None            |
| C4.125 | 4 | 20 | Female | Negative | Negative | No | No     | No | 2nd dose | Covid-19 (Moderna)       | Covid-19 (Moderna)   | 11/8/2021 | 59  | None | None            |
| C4.126 | 4 | 21 | Male   | Negative | Negative | No | No     | No | 2nd dose | Comirnaty (Biontech)     | Comirnaty (Biontech) | N/A       | N/A | None | None            |
| C4.127 | 4 | 29 | Male   | Negative | Negative | No | No     | No | 1st dose | Johnson & Johnson        |                      | 5/6/2021  | 126 | None | None            |
| C4.128 | 4 | 30 | Female | Negative | Negative | No | No     | No | 2nd dose | Comirnaty (Biontech)     | Comirnaty (Biontech) | 29/6/2021 | 102 | None | None            |
| C4.129 | 4 | 30 | Female | Negative | Negative | No | No     | No | 2nd dose | Comirnaty (Biontech)     | Comirnaty (Biontech) | 30/6/2021 | 101 | None | None            |
| C4.130 | 4 | 19 | Female | Negative | Negative | No | No     | No | 1st dose | Johnson & Johnson        |                      | N/A       | N/A | None | None            |
| C4.131 | 4 | 26 | Male   | Negative | Negative | No | Unsure | No | 2nd dose | Comirnaty (Biontech)     | Comirnaty (Biontech) | 7/6/2021  | 124 | None | None            |

|        |   |    |        |          |          |    |     |    |              |                          |                      |           |     |              |             |
|--------|---|----|--------|----------|----------|----|-----|----|--------------|--------------------------|----------------------|-----------|-----|--------------|-------------|
| C4.132 | 4 | 28 | Male   | Negative | Negative | No | No  | No | 2nd dose     | Covid-19 (Moderna)       | Covid-19 (Moderna)   | 28/6/2021 | 103 | None         | None        |
| C4.133 | 4 | 36 | Male   | Negative | Negative | No | Yes | No | 2nd dose     | Vaxzevria (Astra-Zeneca) | Covid-19 (Moderna)   | 17/6/2021 | 114 | None         | None        |
| C4.134 | 4 | 19 | Female | Negative | Negative | No | Yes | No | 1st dose     | Comirnaty (Biontech)     |                      | 8/6/2021  | 123 | None         | None        |
| C4.135 | 4 | 28 | Female | Negative | Negative | No | No  | No | 2nd dose     | Comirnaty (Biontech)     | Comirnaty (Biontech) | 2/8/2021  | 68  | None         | None        |
| C4.136 | 4 | 24 | Male   | Negative | Negative | No | No  | No | 1st dose     | Johnson & Johnson        |                      | 10/6/2021 | 121 | None         | None        |
| C4.137 | 4 | 20 | Female | Negative | Negative | No | No  | No | 2nd dose     | Comirnaty (Biontech)     | Comirnaty (Biontech) | 28/6/2021 | 103 | None         | None        |
| C4.138 | 4 | 24 | Female | Negative | Negative | No | No  | No | 2nd dose     | Comirnaty (Biontech)     | Comirnaty (Biontech) | 21/7/2021 | 80  | None         | None        |
| C4.139 | 4 | 24 | Female | Negative | Negative | No | No  | No | 2nd dose     | Comirnaty (Biontech)     | Comirnaty (Biontech) | 21/4/2021 | 171 | None         | None        |
| C4.140 | 4 | 26 | Male   | Negative | Negative | No | No  | No | 2nd dose     | Comirnaty (Biontech)     | Comirnaty (Biontech) | 16/7/2021 | 85  | None         | None        |
| C4.141 | 4 | 35 | Female | Negative | Negative | No | No  | No | 2nd dose     | Comirnaty (Biontech)     | Comirnaty (Biontech) | 8/7/2021  | 93  | Epilepsy     | Lamotrigin  |
| C4.142 | 4 | 34 | Female | Negative | Negative | No | No  | No | 2nd dose     | Comirnaty (Biontech)     | Comirnaty (Biontech) | 28/1/2021 | 254 | None         | None        |
| C4.143 | 4 | 29 | Male   | Negative | Negative | No | No  | No | 2nd dose     | Comirnaty (Biontech)     | Comirnaty (Biontech) | 27/7/2021 | 74  | None         | None        |
| C4.144 | 4 | 19 | Female | Negative | Negative | No | No  | No | 2nd dose     | Comirnaty (Biontech)     | Comirnaty (Biontech) | 24/7/2021 | 77  | None         | None        |
| C4.145 | 4 | 23 | Female | Negative | Negative | No | No  | No | 2nd dose     | Comirnaty (Biontech)     | Comirnaty (Biontech) | 27/6/2021 | 104 | None         | None        |
| C4.146 | 4 | 27 | Male   | Negative | Negative | No | No  | No | 2nd dose     | Vaxzevria (Astra-Zeneca) | Comirnaty (Biontech) | 26/7/2021 | 75  | None         | None        |
| C4.147 | 4 | 25 | Female | Negative | Negative | No | No  | No | 2nd dose     | Comirnaty (Biontech)     | Comirnaty (Biontech) | 27/6/2021 | 104 | None         | None        |
| C4.148 | 4 | 41 | Female | Negative | Negative | No | No  | No | 2nd dose     | Comirnaty (Biontech)     | Comirnaty (Biontech) | 10/6/2021 | 121 | None         | None        |
| C4.149 | 4 | 42 | Male   | Negative | Negative | No | No  | No | 2nd dose     | Comirnaty (Biontech)     | Comirnaty (Biontech) | 14/7/2021 | 87  | Hypertension | Candesartan |
| C4.150 | 4 | 23 | Female | Negative | Negative | No | No  | No | 2nd dose     | Covid-19 (Moderna)       | Covid-19 (Moderna)   | 10/6/2021 | 121 | None         | None        |
| C4.151 | 4 | 19 | Male   | Negative | Negative | No | No  | No | Unvaccinated |                          |                      |           |     | None         | None        |
| C4.152 | 4 | 24 | Female | Negative | Negative | No | No  | No | 2nd dose     | Comirnaty (Biontech)     | Comirnaty (Biontech) | 27/5/2021 | 135 | None         | None        |
| C4.153 | 4 | 24 | Female | Negative | Negative | No | No  | No | 2nd dose     | Covid-19 (Moderna)       | Covid-19 (Moderna)   | 25/7/2021 | 76  | None         | None        |

|        |   |    |        |          |          |    |        |    |              |                          |                      |           |     |                |                                |
|--------|---|----|--------|----------|----------|----|--------|----|--------------|--------------------------|----------------------|-----------|-----|----------------|--------------------------------|
| C4.154 | 4 | 24 | Female | Negative | Negative | No | No     | No | 2nd dose     | Comirnaty (Biontech)     | Comirnaty (Biontech) | 2/7/2021  | 99  | Hypothyroidism | L-thyroxine                    |
| C4.155 | 4 | 26 | Male   | Negative | Negative | No | No     | No | 1st dose     | Johnson & Johnson        |                      | 30/8/2021 | 40  | None           | None                           |
| C4.156 | 4 | 35 | Female | Negative | Negative | No | No     | No | 1st dose     | Johnson & Johnson        |                      | N/A       | N/A | None           | None                           |
| C4.157 | 4 | 26 | Female | Negative | Negative | No | No     | No | 2nd dose     | Comirnaty (Biontech)     | Comirnaty (Biontech) | 8/7/2021  | 93  | None           | None                           |
| C4.158 | 4 | 27 | Female | Negative | Negative | No | No     | No | 2nd dose     | Comirnaty (Biontech)     | Comirnaty (Biontech) | 4/8/2021  | 66  | None           | None                           |
| C4.159 | 4 | 30 | Male   | Negative | Negative | No | No     | No | 2nd dose     | Comirnaty (Biontech)     | Comirnaty (Biontech) | 3/8/2021  | 67  | None           | None                           |
| C4.160 | 4 | 39 | Female | Negative | Negative | No | No     | No | Unvaccinated |                          |                      |           |     | None           | None                           |
| C4.161 | 4 | 42 | Male   | Negative | Negative | No | No     | No | 2nd dose     | Comirnaty (Biontech)     | Comirnaty (Biontech) | 10/8/2021 | 60  | None           | None                           |
| C4.162 | 4 | 38 | Male   | Negative | Negative | No | No     | No | 2nd dose     | Johnson & Johnson        |                      | 20/6/2021 | 111 | None           | None                           |
| C4.163 | 4 | 35 | Male   | Negative | Negative | No | Unsure | No | 2nd dose     | Covid-19 (Moderna)       | Covid-19 (Moderna)   | 4/7/2021  | 97  | None           | None                           |
| C4.164 | 4 | 20 | Female | Negative | Negative | No | No     | No | 2nd dose     | Comirnaty (Biontech)     | Comirnaty (Biontech) | 28/7/2021 | 73  | None           | None                           |
| C4.165 | 4 | 22 | Male   | Negative | Negative | No | No     | No | 2nd dose     | Vaxzevria (Astra-Zeneca) | Comirnaty (Biontech) | 10/5/2021 | 152 | None           | None                           |
| C4.166 | 4 | 19 | Female | Negative | Negative | No | No     | No | 2nd dose     | Comirnaty (Biontech)     | Comirnaty (Biontech) | 3/2/2021  | 248 | None           | None                           |
| C4.167 | 4 | 28 | Female | Negative | Negative | No | Unsure | No | Unvaccinated |                          |                      |           |     | None           | None                           |
| C4.168 | 4 | 24 | Male   | Negative | Negative | No | No     | No | 2nd dose     | Covid-19 (Moderna)       | Covid-19 (Moderna)   | 4/6/2021  | 127 | None           | None                           |
| C4.169 | 4 | 22 | Female | Negative | Negative | No | No     | No | 2nd dose     | Comirnaty (Biontech)     | Comirnaty (Biontech) | 26/6/2021 | 105 | None           | None                           |
| C4.170 | 4 | 30 | Male   | Negative | Negative | No | No     | No | 2nd dose     | Comirnaty (Biontech)     | Comirnaty (Biontech) | 1/6/2021  | 130 | Hypertension   | Acetylsalicylic acid, ramipril |
| C4.171 | 4 | 26 | Female | Negative | Negative | No | No     | No | 2nd dose     | Comirnaty (Biontech)     | Comirnaty (Biontech) | 10/8/2021 | 60  | None           | None                           |
| C4.172 | 4 | 26 | Female | Negative | Negative | No | No     | No | 2nd dose     | Vaxzevria (Astra-Zeneca) | Comirnaty (Biontech) | 28/5/2021 | 134 | None           | None                           |
| C4.173 | 4 | 27 | Male   | Negative | Negative | No | No     | No | 1st dose     | Johnson & Johnson        |                      | 4/6/2021  | 127 | None           | None                           |
| C4.174 | 4 | 22 | Male   | Negative | Negative | No | No     | No | 2nd dose     | Vaxzevria (Astra-Zeneca) | Comirnaty (Biontech) | 2/7/2021  | 99  | None           | None                           |
| C4.175 | 4 | 27 | Female | Negative | Negative | No | No     | No | 2nd dose     | Covid-19 (Moderna)       | Covid-19 (Moderna)   | 25/7/2021 | 76  | None           | None                           |

|        |   |    |        |          |          |    |    |    |          |                          |                          |           |     |                    |                                     |
|--------|---|----|--------|----------|----------|----|----|----|----------|--------------------------|--------------------------|-----------|-----|--------------------|-------------------------------------|
| C4.176 | 4 | 21 | Female | Negative | Negative | No | No | No | 2nd dose | Comirnaty (Biontech)     | Comirnaty (Biontech)     | 23/6/2021 | 108 | None               | None                                |
| C4.177 | 4 | 21 | Female | Negative | Negative | No | No | No | 2nd dose | Comirnaty (Biontech)     | Comirnaty (Biontech)     | 21/5/2021 | 141 | None               | None                                |
| C4.178 | 4 | 36 | Male   | Negative | Negative | No | No | No | 2nd dose | Comirnaty (Biontech)     | Comirnaty (Biontech)     | 22/6/2021 | 109 | None               | None                                |
| C4.179 | 4 | 25 | Male   | Negative | Negative | No | No | No | 2nd dose | Comirnaty (Biontech)     | Comirnaty (Biontech)     | 9/7/2021  | 92  | None               | None                                |
| C4.180 | 4 | 31 | Female | Negative | Negative | No | No | No | 2nd dose | Vaxzevria (Astra-Zeneca) | Covid-19 (Moderna)       | 14/6/2021 | 117 | None               | None                                |
| C4.181 | 4 | 23 | Female | Negative | Negative | No | No | No | 2nd dose | Vaxzevria (Astra-Zeneca) | Comirnaty (Biontech)     | 21/5/2021 | 141 | None               | None                                |
| C4.182 | 4 | 21 | Male   | Negative | Negative | No | No | No | 2nd dose | Comirnaty (Biontech)     | Comirnaty (Biontech)     | 6/8/2021  | 64  | None               | None                                |
| C4.183 | 4 | 37 | Male   | Negative | Negative | No | No | No | 2nd dose | Vaxzevria (Astra-Zeneca) | Vaxzevria (Astra-Zeneca) | 8/6/2021  | 123 | None               | None                                |
| C4.184 | 4 | 21 | Male   | Negative | Negative | No | No | No | 2nd dose | Comirnaty (Biontech)     | Comirnaty (Biontech)     | 23/6/2021 | 108 | None               | None                                |
| C4.185 | 4 | 34 | Male   | Negative | Negative | No | No | No | 2nd dose | Comirnaty (Biontech)     | Comirnaty (Biontech)     | 3/6/2021  | 128 | Ulcerative colitis | Vedolizumab, mesalazine, loperamide |
| C4.186 | 4 | 21 | Male   | Negative | Negative | No | No | No | 2nd dose | Comirnaty (Biontech)     | Comirnaty (Biontech)     | N/A       | N/A | None               | None                                |
| C4.187 | 4 | 44 | Female | Negative | Negative | No | No | No | 2nd dose | Vaxzevria (Astra-Zeneca) | Comirnaty (Biontech)     | 5/5/2021  | 157 | None               | None                                |
| C4.188 | 4 | 23 | Male   | Negative | Negative | No | No | No | 1st dose | Johnson & Johnson        |                          | 15/6/2021 | 116 | None               | None                                |
| C4.189 | 4 | 43 | Male   | Negative | Negative | No | No | No | 2nd dose | Comirnaty (Biontech)     | Comirnaty (Biontech)     | 22/5/2021 | 140 | None               | None                                |
| C4.190 | 4 | 36 | Male   | Negative | Negative | No | No | No | 2nd dose | Comirnaty (Biontech)     | Comirnaty (Biontech)     | 27/7/2021 | 74  | None               | None                                |
| C4.191 | 4 | 24 | Female | Negative | Negative | No | No | No | 2nd dose | Comirnaty (Biontech)     | Comirnaty (Biontech)     | 8/6/2021  | 123 | None               | None                                |
| C4.192 | 4 | 23 | Male   | Negative | Negative | No | No | No | 2nd dose | Vaxzevria (Astra-Zeneca) | Comirnaty (Biontech)     | 27/7/2021 | 74  | Chronic urticaria  | Fexofenadine, omalizumab            |
| C4.193 | 4 | 34 | Female | Negative | Negative | No | No | No | 2nd dose | Comirnaty (Biontech)     | Comirnaty (Biontech)     | 27/7/2021 | 74  | None               | None                                |
| C4.194 | 4 | 24 | Female | Negative | Negative | No | No | No | 2nd dose | Covid-19 (Moderna)       | Covid-19 (Moderna)       | 5/6/2021  | 126 | None               | None                                |

|        |   |    |        |          |          |    |        |    |              |                          |                      |           |     |                     |                   |
|--------|---|----|--------|----------|----------|----|--------|----|--------------|--------------------------|----------------------|-----------|-----|---------------------|-------------------|
| C4.195 | 4 | 24 | Female | Negative | Negative | No | No     | No | 2nd dose     | Comirnaty (Biontech)     | Comirnaty (Biontech) | 2/7/2021  | 99  | None                | None              |
| C4.196 | 4 | 26 | Female | Negative | Negative | No | No     | No | 2nd dose     | Vaxzevria (Astra-Zeneca) | Comirnaty (Biontech) | 9/7/2021  | 92  | None                | None              |
| C4.197 | 4 | 42 | Female | Negative | Negative | No | No     | No | 2nd dose     | Comirnaty (Biontech)     | Comirnaty (Biontech) | 21/7/2021 | 80  | None                | None              |
| C4.198 | 4 | 24 | Female | Negative | Negative | No | No     | No | 2nd dose     | Comirnaty (Biontech)     | Comirnaty (Biontech) | 14/7/2021 | 87  | None                | None              |
| C4.199 | 4 | 28 | Male   | Negative | Negative | No | No     | No | 2nd dose     | Comirnaty (Biontech)     | Comirnaty (Biontech) | 25/7/2021 | 76  | None                | None              |
| C4.200 | 4 | 28 | Female | Negative | Negative | No | No     | No | 2nd dose     | Covid-19 (Moderna)       | Covid-19 (Moderna)   | 30/4/2021 | 162 | None                | None              |
| C4.201 | 4 | 23 | Male   | Negative | Negative | No | No     | No | 2nd dose     | Comirnaty (Biontech)     | Comirnaty (Biontech) | 10/6/2021 | 121 | None                | None              |
| C4.202 | 4 | 26 | Female | Negative | Negative | No | No     | No | 1st dose     | Comirnaty (Biontech)     |                      | 5/10/2021 | 4   | Neurodermatitis     | None              |
| C4.203 | 4 | 25 | Male   | Negative | Negative | No | No     | No | 2nd dose     | Comirnaty (Biontech)     | Comirnaty (Biontech) | 8/6/2021  | 123 | None                | None              |
| C4.204 | 4 | 23 | Female | Negative | Negative | No | No     | No | 2nd dose     | Comirnaty (Biontech)     | Comirnaty (Biontech) | 5/8/2021  | 65  | None                | None              |
| C4.205 | 4 | 29 | Female | Negative | Negative | No | Unsure | No | Unvaccinated |                          |                      |           |     | Bechterew's disease | Sertraline        |
| C4.206 | 4 | 31 | Female | Negative | Negative | No | No     | No | 2nd dose     | Comirnaty (Biontech)     | Comirnaty (Biontech) | 14/7/2021 | 87  | Asthma              | None              |
| C4.207 | 4 | 29 | Female | Negative | Negative | No | No     | No | 2nd dose     | Vaxzevria (Astra-Zeneca) | Covid-19 (Moderna)   | 7/7/2021  | 94  | None                | None              |
| C4.208 | 4 | 27 | Male   | Negative | Negative | No | No     | No | 2nd dose     | Comirnaty (Biontech)     | Comirnaty (Biontech) | 24/6/2021 | 107 | None                | None              |
| C4.209 | 4 | 21 | Female | Negative | Negative | No | No     | No | 2nd dose     | Comirnaty (Biontech)     | Comirnaty (Biontech) | 11/6/2021 | 120 | Mental disorder     | Escitalopram      |
| C4.210 | 4 | 26 | Female | Negative | Negative | No | No     | No | 2nd dose     | Comirnaty (Biontech)     | Comirnaty (Biontech) | 22/5/2021 | 140 | None                | None              |
| C4.211 | 4 | 33 | Female | Negative | Negative | No | No     | No | 2nd dose     | Comirnaty (Biontech)     | Comirnaty (Biontech) | 9/9/2021  | 30  | None                | None              |
| C4.212 | 4 | 46 | Male   | Negative | Negative | No | No     | No | 2nd dose     | Comirnaty (Biontech)     | Comirnaty (Biontech) | 13/7/2021 | 88  | Hypertension        | Antihypertensives |
| C4.213 | 4 | 30 | Male   | Negative | Negative | No | No     | No | 1st dose     | Johnson & Johnson        |                      | 17/8/2021 | 53  | None                | None              |
| C4.214 | 4 | 43 | Male   | Negative | Negative | No | No     | No | 2nd dose     | Comirnaty (Biontech)     | Comirnaty (Biontech) | 21/6/2021 | 110 | None                | None              |
| C4.215 | 4 | 23 | Female | Negative | Negative | No | No     | No | 2nd dose     | Comirnaty (Biontech)     | Comirnaty (Biontech) | 18/6/2021 | 113 | None                | None              |

|        |   |    |        |          |          |    |        |    |          |                          |                      |           |     |                 |                |
|--------|---|----|--------|----------|----------|----|--------|----|----------|--------------------------|----------------------|-----------|-----|-----------------|----------------|
| C4.216 | 4 | 27 | Female | Negative | Negative | No | No     | No | 2nd dose | Comirnaty (Biontech)     | Comirnaty (Biontech) | 29/1/2021 | 253 | None            | None           |
| C4.217 | 4 | 21 | Female | Negative | Negative | No | Unsure | No | 2nd dose | Comirnaty (Biontech)     | Comirnaty (Biontech) | 18/6/2021 | 113 | Asthma          | Asthma inhaler |
| C4.218 | 4 | 20 | Female | Negative | Negative | No | Unsure | No | 2nd dose | Covid-19 (Moderna)       | Covid-19 (Moderna)   | 23/8/2021 | 47  | None            | None           |
| C4.219 | 4 | 31 | Male   | Negative | Negative | No | No     | No | 2nd dose | Comirnaty (Biontech)     | Comirnaty (Biontech) | 10/8/2021 | 60  | None            | None           |
| C4.220 | 4 | 51 | Male   | Negative | Negative | No | No     | No | 2nd dose | Comirnaty (Biontech)     | Comirnaty (Biontech) | 18/6/2021 | 113 | None            | None           |
| C4.221 | 4 | 28 | Male   | Negative | Negative | No | No     | No | 2nd dose | Covid-19 (Moderna)       | Covid-19 (Moderna)   | 11/8/2021 | 59  | None            | None           |
| C4.222 | 4 | 28 | Male   | Negative | Negative | No | No     | No | 2nd dose | Comirnaty (Biontech)     | Comirnaty (Biontech) | 25/5/2021 | 137 | None            | None           |
| C4.223 | 4 | 26 | Male   | Negative | Negative | No | No     | No | 1st dose | Johnson & Johnson        |                      | 20/6/2021 | 111 | None            | None           |
| C4.224 | 4 | 31 | Female | Negative | Negative | No | No     | No | 2nd dose | Vaxzevria (Astra-Zeneca) | Comirnaty (Biontech) | 14/6/2021 | 117 | None            | None           |
| C4.225 | 4 | 35 | Male   | Negative | Negative | No | No     | No | 2nd dose | Covid-19 (Moderna)       | Covid-19 (Moderna)   | 1/5/2021  | 161 | None            | None           |
| C4.226 | 4 | 36 | Male   | Negative | Negative | No | No     | No | 2nd dose | Comirnaty (Biontech)     | Comirnaty (Biontech) | 10/6/2021 | 121 | Diabetes type 1 | Insulin        |
| C4.227 | 4 | 27 | Male   | Negative | Negative | No | No     | No | 2nd dose | Covid-19 (Moderna)       | Covid-19 (Moderna)   | 25/7/2021 | 76  | None            | None           |
| C4.228 | 4 | 28 | Female | Negative | Negative | No | No     | No | 2nd dose | Comirnaty (Biontech)     | Comirnaty (Biontech) | 14/5/2021 | 148 | None            | None           |
| C4.229 | 4 | 24 | Female | Negative | Negative | No | No     | No | 2nd dose | Comirnaty (Biontech)     | Comirnaty (Biontech) | 9/6/2021  | 122 | None            | None           |
| C4.230 | 4 | 25 | Female | Negative | Negative | No | No     | No | 2nd dose | Comirnaty (Biontech)     | Comirnaty (Biontech) | 14/7/2021 | 87  | None            | None           |
| C4.231 | 4 | 28 | Female | Negative | Negative | No | No     | No | 2nd dose | Comirnaty (Biontech)     | Comirnaty (Biontech) | 1/6/2021  | 130 | None            | None           |
| C4.232 | 4 | 28 | Male   | Negative | Negative | No | No     | No | 2nd dose | Comirnaty (Biontech)     | Comirnaty (Biontech) | 27/7/2021 | 74  | None            | None           |
| C4.233 | 4 | 22 | Female | Negative | Negative | No | No     | No | 2nd dose | Covid-19 (Moderna)       | Covid-19 (Moderna)   | 9/8/2021  | 61  | None            | None           |
| C4.234 | 4 | 25 | Male   | Negative | Negative | No | No     | No | 2nd dose | Comirnaty (Biontech)     | Comirnaty (Biontech) | 22/7/2021 | 79  | None            | None           |
| C4.235 | 4 | 25 | Female | Negative | Negative | No | Yes    | No | 1st dose | Covid-19 (Moderna)       |                      | 16/9/2021 | 23  | None            | None           |
| C4.236 | 4 | 45 | Female | Negative | Negative | No | No     | No | 2nd dose | Comirnaty (Biontech)     | Comirnaty (Biontech) | 28/6/2021 | 103 | None            | None           |
| C4.237 | 4 | 39 | Female | Negative | Negative | No | No     | No | 2nd dose | Comirnaty (Biontech)     | Comirnaty (Biontech) | 25/6/2021 | 106 | None            | None           |

|        |   |    |        |          |          |    |        |    |          |                          |                      |           |     |                           |              |
|--------|---|----|--------|----------|----------|----|--------|----|----------|--------------------------|----------------------|-----------|-----|---------------------------|--------------|
| C4.238 | 4 | 24 | Female | Negative | Negative | No | No     | No | 2nd dose | Comirnaty (Biontech)     | Comirnaty (Biontech) | 7/7/2021  | 94  | None                      | None         |
| C4.239 | 4 | 33 | Female | Negative | Negative | No | No     | No | 1st dose | Johnson & Johnson        |                      | 11/6/2021 | 120 | None                      | None         |
| C4.240 | 4 | 38 | Male   | Negative | Negative | No | No     | No | 2nd dose | Comirnaty (Biontech)     | Comirnaty (Biontech) | 12/6/2021 | 119 | None                      | None         |
| C4.241 | 4 | 38 | Female | Negative | Negative | No | No     | No | 2nd dose | Comirnaty (Biontech)     | Comirnaty (Biontech) | 17/6/2021 | 114 | None                      | None         |
| C4.242 | 4 | 30 | Female | Negative | Negative | No | No     | No | 2nd dose | Comirnaty (Biontech)     | Comirnaty (Biontech) | 8/2/2021  | 243 | None                      | None         |
| C4.243 | 4 | 34 | Male   | Negative | Negative | No | No     | No | 2nd dose | Covid-19 (Moderna)       | Covid-19 (Moderna)   | 29/6/2021 | 102 | Gastrointestinal disorder | Esomeprazole |
| C4.244 | 4 | 23 | Male   | Negative | Negative | No | No     | No | 2nd dose | Comirnaty (Biontech)     | Comirnaty (Biontech) | 17/6/2021 | 114 | None                      | None         |
| C4.245 | 4 | 25 | Female | Negative | Negative | No | No     | No | 2nd dose | Vaxzevria (Astra-Zeneca) | Covid-19 (Moderna)   | 18/6/2021 | 113 | None                      | None         |
| C4.246 | 4 | 27 | Female | Negative | Negative | No | No     | No | 2nd dose | Comirnaty (Biontech)     | Comirnaty (Biontech) | 20/5/2021 | 142 | None                      | None         |
| C4.247 | 4 | 31 | Male   | Negative | Negative | No | No     | No | 2nd dose | Comirnaty (Biontech)     | Comirnaty (Biontech) | 3/8/2021  | 67  | None                      | None         |
| C4.248 | 4 | 23 | Female | Negative | Negative | No | No     | No | 2nd dose | Comirnaty (Biontech)     | Comirnaty (Biontech) | N/A       | N/A | None                      | None         |
| C4.249 | 4 | 23 | Male   | Negative | Negative | No | Unsure | No | 2nd dose | Comirnaty (Biontech)     | Comirnaty (Biontech) | 16/8/2021 | 54  | None                      | None         |
| C4.250 | 4 | 22 | Female | Negative | Negative | No | No     | No | 2nd dose | Comirnaty (Biontech)     | Comirnaty (Biontech) | 13/7/2021 | 88  | None                      | None         |
| C4.251 | 4 | 24 | Male   | Negative | Negative | No | Unsure | No | 2nd dose | Comirnaty (Biontech)     | Comirnaty (Biontech) | 24/9/2021 | 15  | None                      | None         |
| C4.252 | 4 | 36 | Male   | Negative | Negative | No | No     | No | 2nd dose | Comirnaty (Biontech)     | Comirnaty (Biontech) | 18/2/2021 | 233 | None                      | None         |
| C4.253 | 4 | 20 | Female | Negative | Negative | No | No     | No | 2nd dose | Covid-19 (Moderna)       | Covid-19 (Moderna)   | 29/6/2021 | 102 | None                      | None         |
| C4.254 | 4 | 20 | Male   | Negative | Negative | No | Yes    | No | 1st dose | Comirnaty (Biontech)     |                      | 30/6/2021 | 101 | None                      | None         |
| C4.255 | 4 | 44 | Female | Negative | Negative | No | No     | No | 2nd dose | Comirnaty (Biontech)     | Comirnaty (Biontech) | 3/6/2021  | 128 | None                      | None         |
| C4.256 | 4 | 21 | Male   | Negative | Negative | No | No     | No | 1st dose | Johnson & Johnson        |                      | 26/5/2021 | 136 | None                      | None         |
| C4.257 | 4 | 23 | Male   | Negative | Negative | No | No     | No | 2nd dose | Comirnaty (Biontech)     | Comirnaty (Biontech) | 1/9/2021  | 38  | None                      | None         |
| C4.258 | 4 | 33 | Female | Negative | Negative | No | No     | No | 2nd dose | Comirnaty (Biontech)     | Comirnaty (Biontech) | 29/6/2021 | 102 | Diabetes type 2           | Metformin    |



|        |   |    |        |          |          |    |        |    |              |                          |                      |           |     |                      |                              |
|--------|---|----|--------|----------|----------|----|--------|----|--------------|--------------------------|----------------------|-----------|-----|----------------------|------------------------------|
| C4.259 | 4 | 28 | Male   | Negative | Negative | No | No     | No | 2nd dose     | Vaxzevria (Astra-Zeneca) | Comirnaty (Biontech) | 27/5/2021 | 135 | None                 | None                         |
| C4.260 | 4 | 23 | Female | Negative | Negative | No | No     | No | 2nd dose     | Johnson & Johnson        | Other vaccine        | 15/7/2021 | 86  | Autoimmune hepatitis | Cortisone, immunosuppressors |
| C4.261 | 4 | 27 | Male   | Negative | Negative | No | No     | No | Unvaccinated |                          |                      |           |     | None                 | None                         |
| C4.262 | 4 | 51 | Female | Negative | Negative | No | Yes    | No | Unvaccinated |                          |                      |           |     | None                 | None                         |
| C4.263 | 4 | 25 | Male   | Negative | Negative | No | No     | No | 1st dose     | Johnson & Johnson        |                      | 18/7/2021 | 83  | None                 | None                         |
| C4.264 | 4 | 30 | Female | Negative | Negative | No | No     | No | 2nd dose     | Comirnaty (Biontech)     | Comirnaty (Biontech) | 23/6/2021 | 108 | None                 | None                         |
| C4.265 | 4 | 28 | Male   | Negative | Negative | No | No     | No | 1st dose     | Johnson & Johnson        |                      | 15/7/2021 | 86  | Hypertension         | Candesartan, amlodipine      |
| C4.266 | 4 | 19 | Male   | Negative | Negative | No | No     | No | 2nd dose     | Comirnaty (Biontech)     | Comirnaty (Biontech) | 23/6/2021 | 108 | None                 | None                         |
| C4.267 | 4 | 30 | Male   | Negative | Negative | No | No     | No | 2nd dose     | Vaxzevria (Astra-Zeneca) | Comirnaty (Biontech) | 23/7/2021 | 78  | None                 | None                         |
| C4.268 | 4 | 23 | Male   | Negative | Negative | No | Yes    | No | 1st dose     | Comirnaty (Biontech)     |                      | 1/6/2021  | 130 | None                 | None                         |
| C4.269 | 4 | 33 | Male   | Negative | Negative | No | No     | No | 2nd dose     | Comirnaty (Biontech)     | Comirnaty (Biontech) | 1/9/2021  | 38  | None                 | None                         |
| C4.270 | 4 | 49 | Female | Negative | Negative | No | No     | No | 2nd dose     | Comirnaty (Biontech)     | Comirnaty (Biontech) | 6/8/2021  | 64  | None                 | None                         |
| C4.271 | 4 | 50 | Male   | Negative | Negative | No | Unsure | No | 2nd dose     | Comirnaty (Biontech)     | Comirnaty (Biontech) | 22/7/2021 | 79  | None                 | None                         |
| C4.272 | 4 | 26 | Male   | Negative | Negative | No | No     | No | 1st dose     | Johnson & Johnson        |                      | 5/8/2021  | 65  | None                 | None                         |
| C4.273 | 4 | 49 | Male   | Negative | Negative | No | No     | No | 2nd dose     | Comirnaty (Biontech)     | Comirnaty (Biontech) | 27/7/2021 | 74  | None                 | None                         |
| C4.274 | 4 | 38 | Male   | Negative | Negative | No | No     | No | 2nd dose     | Comirnaty (Biontech)     | Comirnaty (Biontech) | 8/10/2021 | 1   | None                 | None                         |
| C4.275 | 4 | 31 | Male   | Negative | Negative | No | Unsure | No | 2nd dose     | Covid-19 (Moderna)       | Covid-19 (Moderna)   | 24/7/2021 | 77  | None                 | None                         |
| C4.276 | 4 | 25 | Female | Negative | Negative | No | No     | No | 2nd dose     | Vaxzevria (Astra-Zeneca) | Comirnaty (Biontech) | 16/6/2021 | 115 | None                 | None                         |
| C4.277 | 4 | 25 | Female | Negative | Negative | No | No     | No | 2nd dose     | Vaxzevria (Astra-Zeneca) | Comirnaty (Biontech) | 22/5/2021 | 140 | None                 | None                         |
| C4.278 | 4 | 21 | Male   | Negative | Negative | No | Yes    | No | 1st dose     | Comirnaty (Biontech)     |                      | 25/8/2021 | 45  | None                 | None                         |
| C4.279 | 4 | 57 | Male   | Negative | Negative | No | No     | No | 2nd dose     | Comirnaty (Biontech)     | Comirnaty (Biontech) | 24/8/2021 | 46  | None                 | None                         |

|        |   |    |        |          |          |    |        |    |              |                          |                      |           |     |                  |                          |
|--------|---|----|--------|----------|----------|----|--------|----|--------------|--------------------------|----------------------|-----------|-----|------------------|--------------------------|
| C4.280 | 4 | 23 | Female | Negative | Negative | No | No     | No | 2nd dose     | Comirnaty (Biontech)     | Comirnaty (Biontech) | 12/7/2021 | 89  | None             | None                     |
| C4.281 | 4 | 39 | Female | Negative | Negative | No | No     | No | 2nd dose     | Comirnaty (Biontech)     | Comirnaty (Biontech) | 25/5/2021 | 137 | None             | None                     |
| C4.282 | 4 | 28 | Female | Negative | Negative | No | Yes    | No | 1st dose     | Comirnaty (Biontech)     |                      | 23/6/2021 | 108 | None             | None                     |
| C4.283 | 4 | 22 | Female | Negative | Negative | No | No     | No | 2nd dose     | Covid-19 (Moderna)       | Covid-19 (Moderna)   | 7/6/2021  | 124 | None             | None                     |
| C4.284 | 4 | 24 | Male   | Negative | Negative | No | No     | No | 2nd dose     | Comirnaty (Biontech)     | Comirnaty (Biontech) | 25/4/2021 | 167 | None             | None                     |
| C4.285 | 4 | 24 | Female | Negative | Negative | No | No     | No | 2nd dose     | Comirnaty (Biontech)     | Comirnaty (Biontech) | 5/7/2021  | 96  | None             | None                     |
| C4.286 | 4 | 19 | Male   | Negative | Negative | No | No     | No | 2nd dose     | Comirnaty (Biontech)     | Comirnaty (Biontech) | 22/7/2021 | 79  | None             | None                     |
| C4.287 | 4 | 51 | Female | Negative | Negative | No | No     | No | 2nd dose     | Covid-19 (Moderna)       | Covid-19 (Moderna)   | 25/9/2021 | 14  | None             | None                     |
| C4.288 | 4 | 18 | Male   | Negative | Negative | No | No     | No | 2nd dose     | Comirnaty (Biontech)     | Comirnaty (Biontech) | 13/7/2021 | 88  | None             | None                     |
| C4.289 | 4 | 23 | Male   | Negative | Negative | No | No     | No | 2nd dose     | Comirnaty (Biontech)     | Comirnaty (Biontech) | 9/8/2021  | 61  | None             | None                     |
| C4.290 | 4 | 24 | Male   | Negative | Negative | No | No     | No | 2nd dose     | Covid-19 (Moderna)       | Covid-19 (Moderna)   | 20/7/2021 | 81  | Bronchial asthma | Formoterol+beclometasone |
| C4.291 | 4 | 23 | Male   | Negative | Negative | No | No     | No | 2nd dose     | Comirnaty (Biontech)     | Comirnaty (Biontech) | 28/7/2021 | 73  | None             | None                     |
| C4.292 | 4 | 25 | Female | Negative | Negative | No | No     | No | 2nd dose     | Comirnaty (Biontech)     | Comirnaty (Biontech) | 8/6/2021  | 123 | None             | None                     |
| C4.293 | 4 | 24 | Male   | Negative | Negative | No | No     | No | 2nd dose     | Covid-19 (Moderna)       | Covid-19 (Moderna)   | 5/8/2021  | 65  | None             | None                     |
| C4.294 | 4 | 37 | Male   | Negative | Negative | No | No     | No | 2nd dose     | Vaxzevria (Astra-Zeneca) | Comirnaty (Biontech) | 13/7/2021 | 88  | None             | None                     |
| C4.295 | 4 | 25 | Female | Negative | Negative | No | Yes    | No | 1st dose     | Comirnaty (Biontech)     |                      | 28/9/2021 | 11  | None             | None                     |
| C4.296 | 4 | 19 | Female | Negative | Negative | No | No     | No | Unvaccinated |                          |                      |           |     | None             | None                     |
| C4.297 | 4 | 34 | Female | Negative | Negative | No | No     | No | 2nd dose     | Comirnaty (Biontech)     | Comirnaty (Biontech) | 3/2/2021  | 248 | None             | None                     |
| C4.298 | 4 | 35 | Female | Negative | Negative | No | Unsure | No | 2nd dose     | Comirnaty (Biontech)     | Comirnaty (Biontech) | 18/6/2021 | 113 | None             | None                     |
| C4.299 | 4 | 34 | Female | Negative | Negative | No | No     | No | 2nd dose     | Vaxzevria (Astra-Zeneca) | Comirnaty (Biontech) | 26/5/2021 | 136 | None             | None                     |
| C4.300 | 4 | 38 | Male   | Negative | Negative | No | No     | No | 2nd dose     | Covid-19 (Moderna)       | Covid-19 (Moderna)   | 7/7/2021  | 94  | None             | None                     |
| C4.301 | 4 | 36 | Female | Negative | Negative | No | No     | No | 2nd dose     | Covid-19 (Moderna)       | Covid-19 (Moderna)   | 1/5/2021  | 161 | None             | None                     |

|        |   |    |        |          |          |    |        |    |              |                          |                      |           |     |                                                             |                         |
|--------|---|----|--------|----------|----------|----|--------|----|--------------|--------------------------|----------------------|-----------|-----|-------------------------------------------------------------|-------------------------|
| C4.302 | 4 | 28 | Female | Negative | Negative | No | No     | No | 2nd dose     | Comirnaty (Biontech)     | Comirnaty (Biontech) | 3/8/2021  | 67  | None                                                        | None                    |
| C4.303 | 4 | 46 | Male   | Negative | Negative | No | No     | No | 2nd dose     | Covid-19 (Moderna)       | Covid-19 (Moderna)   | 11/6/2021 | 120 | None                                                        | None                    |
| C4.304 | 4 | 25 | Male   | Negative | Negative | No | Unsure | No | 1st dose     | Johnson & Johnson        |                      | 4/6/2021  | 127 | None                                                        | None                    |
| C4.305 | 4 | 18 | Male   | Negative | Negative | No | No     | No | 2nd dose     | Comirnaty (Biontech)     | Comirnaty (Biontech) | 10/7/2021 | 91  | None                                                        | None                    |
| C4.306 | 4 | 70 | Male   | Negative | Negative | No | No     | No | 2nd dose     | Comirnaty (Biontech)     | Comirnaty (Biontech) | 25/5/2021 | 137 | Hypercholesterolemia, mental disorder/neurological disorder | Pregabalin, Simvastatin |
| C4.307 | 4 | 51 | Female | Negative | Negative | No | No     | No | 2nd dose     | Comirnaty (Biontech)     | Comirnaty (Biontech) | 4/6/2021  | 127 | None                                                        | None                    |
| C4.308 | 4 | 36 | Male   | Negative | Negative | No | No     | No | 2nd dose     | Comirnaty (Biontech)     | Comirnaty (Biontech) | 23/6/2021 | 108 | None                                                        | None                    |
| C4.309 | 4 | 18 | Male   | Negative | Negative | No | No     | No | 2nd dose     | Covid-19 (Moderna)       | Covid-19 (Moderna)   | 7/7/2021  | 94  | None                                                        | None                    |
| C4.310 | 4 | 26 | Male   | Negative | Negative | No | No     | No | 2nd dose     | Comirnaty (Biontech)     | Comirnaty (Biontech) | 18/6/2021 | 113 | None                                                        | None                    |
| C4.311 | 4 | 45 | Male   | Negative | Negative | No | No     | No | 2nd dose     | Covid-19 (Moderna)       | Covid-19 (Moderna)   | 25/7/2021 | 76  | None                                                        | None                    |
| C4.312 | 4 | 39 | Male   | Negative | Negative | No | No     | No | 2nd dose     | Comirnaty (Biontech)     | Comirnaty (Biontech) | 10/7/2021 | 91  | None                                                        | None                    |
| C4.313 | 4 | 29 | Female | Negative | Negative | No | No     | No | 1st dose     | Johnson & Johnson        |                      | 3/6/2021  | 128 | None                                                        | None                    |
| C4.314 | 4 | 28 | Male   | Negative | Negative | No | No     | No | Unvaccinated |                          |                      |           |     | None                                                        | None                    |
| C4.315 | 4 | 28 | Male   | Negative | Negative | No | Yes    | No | 1st dose     | Johnson & Johnson        |                      | 7/8/2021  | 63  | None                                                        | None                    |
| C4.316 | 4 | 32 | Male   | Negative | Negative | No | No     | No | Unvaccinated |                          |                      |           |     | None                                                        | None                    |
| C4.317 | 4 | 36 | Female | Negative | Negative | No | No     | No | 2nd dose     | Comirnaty (Biontech)     | Comirnaty (Biontech) | 22/4/2021 | 170 | None                                                        | None                    |
| C4.318 | 4 | 21 | Female | Negative | Negative | No | No     | No | 2nd dose     | Comirnaty (Biontech)     | Comirnaty (Biontech) | 17/5/2021 | 145 | None                                                        | None                    |
| C4.319 | 4 | 32 | Male   | Negative | Negative | No | No     | No | 2nd dose     | Comirnaty (Biontech)     | Comirnaty (Biontech) | 7/7/2021  | 94  | None                                                        | None                    |
| C4.320 | 4 | 25 | Female | Negative | Negative | No | No     | No | 2nd dose     | Comirnaty (Biontech)     | Comirnaty (Biontech) | 2/6/2021  | 129 | None                                                        | None                    |
| C4.321 | 4 | 25 | Male   | Negative | Negative | No | No     | No | 2nd dose     | Comirnaty (Biontech)     | Comirnaty (Biontech) | 27/6/2021 | 104 | None                                                        | None                    |
| C4.322 | 4 | 28 | Male   | Negative | Negative | No | No     | No | 2nd dose     | Vaxzevria (Astra-Zeneca) | Comirnaty (Biontech) | 15/7/2021 | 86  | None                                                        | None                    |
| C4.323 | 4 | 34 | Female | Negative | Negative | No | No     | No | 2nd dose     | Covid-19 (Moderna)       | Covid-19 (Moderna)   | 28/7/2021 | 73  | None                                                        | None                    |

|        |   |    |        |          |          |    |        |    |              |                      |                      |           |     |              |                           |
|--------|---|----|--------|----------|----------|----|--------|----|--------------|----------------------|----------------------|-----------|-----|--------------|---------------------------|
| C4.324 | 4 | 33 | Male   | Negative | Negative | No | No     | No | 2nd dose     | Covid-19 (Moderna)   | Covid-19 (Moderna)   | 26/7/2021 | 75  | N/A          | Methylphenidat, Bupropion |
| C4.325 | 4 | 27 | Male   | Negative | Negative | No | Yes    | No | 1st dose     | Comirnaty (Biontech) |                      | 15/4/2021 | 177 | None         | None                      |
| C4.326 | 4 | 31 | Male   | Negative | Negative | No | No     | No | 2nd dose     | Johnson & Johnson    | Other vaccine        | 6/5/2021  | 156 | None         | None                      |
| C4.327 | 4 | 55 | Female | Negative | Negative | No | No     | No | 2nd dose     | Comirnaty (Biontech) | Comirnaty (Biontech) | 24/7/2021 | 77  | None         | None                      |
| C4.328 | 4 | 19 | Male   | Negative | Negative | No | No     | No | 1st dose     | Johnson & Johnson    |                      | 19/6/2021 | 112 | None         | None                      |
| C4.329 | 4 | 70 | Male   | Negative | Negative | No | No     | No | 2nd dose     | Comirnaty (Biontech) | Comirnaty (Biontech) | 22/6/2021 | 109 | Hypertension | Ramipril                  |
| C4.330 | 4 | 22 | Female | Negative | Negative | No | No     | No | Unvaccinated |                      |                      |           |     | None         | None                      |
| C4.331 | 4 | 37 | Female | Negative | Negative | No | No     | No | Unvaccinated |                      |                      |           |     | None         | None                      |
| C4.332 | 4 | 19 | Female | Negative | Negative | No | No     | No | 2nd dose     | Comirnaty (Biontech) | Comirnaty (Biontech) | 29/7/2021 | 72  | None         | None                      |
| C4.333 | 4 | 22 | Female | Negative | Negative | No | No     | No | 2nd dose     | Comirnaty (Biontech) | Comirnaty (Biontech) | 29/7/2021 | 72  | None         | None                      |
| C4.334 | 4 | 32 | Male   | Negative | Negative | No | No     | No | 2nd dose     | Comirnaty (Biontech) | Comirnaty (Biontech) | 27/7/2021 | 74  | None         | None                      |
| C4.335 | 4 | 28 | Male   | Negative | Negative | No | No     | No | 2nd dose     | Comirnaty (Biontech) | Comirnaty (Biontech) | 23/7/2021 | 78  | None         | None                      |
| C4.336 | 4 | 24 | Female | Negative | Negative | No | No     | No | 2nd dose     | Comirnaty (Biontech) | Comirnaty (Biontech) | 22/7/2021 | 79  | None         | None                      |
| C4.337 | 4 | 25 | Female | Negative | Negative | No | No     | No | 2nd dose     | Comirnaty (Biontech) | Comirnaty (Biontech) | 25/6/2021 | 106 | None         | None                      |
| C4.338 | 4 | 26 | Female | Negative | Negative | No | No     | No | 2nd dose     | Comirnaty (Biontech) | Comirnaty (Biontech) | 16/6/2021 | 115 | None         | None                      |
| C4.339 | 4 | 32 | Male   | Negative | Negative | No | No     | No | 2nd dose     | Covid-19 (Moderna)   | Covid-19 (Moderna)   | 23/7/2021 | 78  | None         | None                      |
| C4.340 | 4 | 29 | Male   | Negative | Negative | No | No     | No | 2nd dose     | Johnson & Johnson    | Other vaccine        | 1/6/2021  | 130 | None         | None                      |
| C4.341 | 4 | 24 | Female | Negative | Negative | No | No     | No | 2nd dose     | Comirnaty (Biontech) | Comirnaty (Biontech) | 27/6/2021 | 104 | None         | None                      |
| C4.342 | 4 | 25 | Male   | Negative | Negative | No | Unsure | No | 2nd dose     | Comirnaty (Biontech) | Comirnaty (Biontech) | 28/7/2021 | 73  | None         | None                      |
| C4.343 | 4 | 24 | Male   | Negative | Negative | No | No     | No | 2nd dose     | Comirnaty (Biontech) | Comirnaty (Biontech) | 6/8/2021  | 64  | None         | None                      |
| C4.344 | 4 | 33 | Male   | Negative | Negative | No | No     | No | 2nd dose     | Comirnaty (Biontech) | Comirnaty (Biontech) | 16/6/2021 | 115 | None         | None                      |
| C4.345 | 4 | 24 | Male   | Negative | Negative | No | No     | No | 2nd dose     | Comirnaty (Biontech) | Comirnaty (Biontech) | 12/7/2021 | 89  | None         | None                      |
| C4.346 | 4 | 22 | Male   | Negative | Negative | No | No     | No | 2nd dose     | Covid-19 (Moderna)   | Covid-19 (Moderna)   | 7/8/2021  | 63  | None         | None                      |

|        |   |    |        |          |          |    |        |    |          |                          |                      |           |     |                  |             |
|--------|---|----|--------|----------|----------|----|--------|----|----------|--------------------------|----------------------|-----------|-----|------------------|-------------|
| C4.347 | 4 | 22 | Male   | Negative | Negative | No | No     | No | 2nd dose | Comirnaty (Biontech)     | Comirnaty (Biontech) | 19/8/2021 | 51  | None             | None        |
| C4.348 | 4 | 25 | Female | Negative | Negative | No | No     | No | 2nd dose | Comirnaty (Biontech)     | Comirnaty (Biontech) | 12/7/2021 | 89  | Thyroid disorder | L-thyroxine |
| C4.349 | 4 | 32 | Male   | Negative | Negative | No | No     | No | 2nd dose | Comirnaty (Biontech)     | Comirnaty (Biontech) | 11/6/2021 | 120 | None             | None        |
| C4.350 | 4 | 26 | Female | Negative | Negative | No | No     | No | 2nd dose | Comirnaty (Biontech)     | Comirnaty (Biontech) | 26/5/2021 | 136 | Hypothyroidism   | L-thyroxine |
| C4.351 | 4 | 33 | Female | Negative | Negative | No | No     | No | 2nd dose | Comirnaty (Biontech)     | Comirnaty (Biontech) | 10/6/2021 | 121 | Hashimoto        | L-thyroxine |
| C4.352 | 4 | 31 | Female | Negative | Negative | No | Unsure | No | 2nd dose | Comirnaty (Biontech)     | Comirnaty (Biontech) | 29/5/2021 | 133 | None             | None        |
| C4.353 | 4 | 40 | Female | Negative | Negative | No | No     | No | 2nd dose | Comirnaty (Biontech)     | Comirnaty (Biontech) | 20/7/2021 | 81  | None             | None        |
| C4.354 | 4 | 51 | Male   | Negative | Negative | No | No     | No | 2nd dose | Comirnaty (Biontech)     | Comirnaty (Biontech) | 8/6/2021  | 123 | Hypertension     | Ramipril    |
| C4.355 | 4 | 36 | Male   | Negative | Negative | No | No     | No | 2nd dose | Covid-19 (Moderna)       | Covid-19 (Moderna)   | 7/8/2021  | 63  | None             | None        |
| C4.356 | 4 | 35 | Female | Negative | Negative | No | No     | No | 2nd dose | Comirnaty (Biontech)     | Comirnaty (Biontech) | 20/7/2021 | 81  | None             | None        |
| C4.357 | 4 | 23 | Female | Negative | Negative | No | No     | No | 2nd dose | Comirnaty (Biontech)     | Comirnaty (Biontech) | 14/7/2021 | 87  | None             | None        |
| C4.358 | 4 | 34 | Male   | Negative | Negative | No | No     | No | 2nd dose | Vaxzevria (Astra-Zeneca) | Comirnaty (Biontech) | 8/8/2021  | 62  | None             | None        |
| C4.359 | 4 | 26 | Male   | Negative | Negative | No | No     | No | 1st dose | Johnson & Johnson        |                      | N/A       | N/A | None             | None        |
| C4.360 | 4 | 24 | Female | Negative | Negative | No | No     | No | 2nd dose | Comirnaty (Biontech)     | Comirnaty (Biontech) | 14/7/2021 | 87  | None             | None        |
| C4.361 | 4 | 33 | Male   | Negative | Negative | No | Unsure | No | 2nd dose | Comirnaty (Biontech)     | Comirnaty (Biontech) | 10/6/2021 | 121 | Hypertension     | Valsartan   |
| C4.362 | 4 | 29 | Female | Negative | Negative | No | No     | No | 2nd dose | Covid-19 (Moderna)       | Covid-19 (Moderna)   | 9/8/2021  | 61  | None             | None        |
| C4.363 | 4 | 37 | Male   | Negative | Negative | No | No     | No | 2nd dose | Comirnaty (Biontech)     | Comirnaty (Biontech) | 29/7/2021 | 72  | Hypertension     | Ramipril    |
| C4.364 | 4 | 23 | Male   | Negative | Negative | No | No     | No | 2nd dose | Comirnaty (Biontech)     | Comirnaty (Biontech) | 2/6/2021  | 129 | None             | None        |
| C4.365 | 4 | 42 | Female | Negative | Negative | No | No     | No | 2nd dose | Comirnaty (Biontech)     | Comirnaty (Biontech) | 10/8/2021 | 60  | None             | None        |
| C4.366 | 4 | 38 | Female | Negative | Negative | No | No     | No | 2nd dose | Covid-19 (Moderna)       | Covid-19 (Moderna)   | 9/8/2021  | 61  | None             | None        |
| C4.367 | 4 | 33 | Female | Negative | Negative | No | No     | No | 2nd dose | Comirnaty (Biontech)     | Comirnaty (Biontech) | 8/6/2021  | 123 | None             | None        |
| C4.368 | 4 | 29 | Male   | Negative | Negative | No | No     | No | 2nd dose | Comirnaty (Biontech)     | Comirnaty (Biontech) | 5/8/2021  | 65  | None             | None        |

|        |   |    |        |          |          |    |    |    |              |                          |                      |           |     |                    |                       |
|--------|---|----|--------|----------|----------|----|----|----|--------------|--------------------------|----------------------|-----------|-----|--------------------|-----------------------|
| C4.369 | 4 | 31 | Male   | Negative | Negative | No | No | No | 2nd dose     | Comirnaty (Biontech)     | Comirnaty (Biontech) | 17/9/2021 | 22  | None               | None                  |
| C4.370 | 4 | 53 | Female | Negative | Negative | No | No | No | 2nd dose     | Vaxzevria (Astra-Zeneca) | Comirnaty (Biontech) | 26/4/2021 | 166 | None               | None                  |
| C4.371 | 4 | 29 | Female | Negative | Negative | No | No | No | 2nd dose     | Covid-19 (Moderna)       | Covid-19 (Moderna)   | 8/7/2021  | 93  | Tachycardia        | Metoprolol            |
| C4.372 | 4 | 22 | Male   | Negative | Negative | No | No | No | 2nd dose     | Covid-19 (Moderna)       | Covid-19 (Moderna)   | 23/8/2021 | 47  | None               | None                  |
| C4.373 | 4 | 31 | Female | Negative | Negative | No | No | No | 2nd dose     | Comirnaty (Biontech)     | Comirnaty (Biontech) | 17/9/2021 | 22  | None               | None                  |
| C4.374 | 4 | 21 | Male   | Negative | Negative | No | No | No | 2nd dose     | Comirnaty (Biontech)     | Comirnaty (Biontech) | 18/8/2021 | 52  | None               | None                  |
| C4.375 | 4 | 21 | Female | Negative | Negative | No | No | No | 2nd dose     | Comirnaty (Biontech)     | Comirnaty (Biontech) | 18/8/2021 | 52  | None               | None                  |
| C4.376 | 4 | 22 | Female | Negative | Negative | No | No | No | 2nd dose     | Comirnaty (Biontech)     | Comirnaty (Biontech) | 14/7/2021 | 87  | None               | None                  |
| C4.377 | 4 | 53 | Female | Negative | Negative | No | No | No | 2nd dose     | Comirnaty (Biontech)     | Comirnaty (Biontech) | 23/2/2021 | 228 | None               | None                  |
| C4.378 | 4 | 22 | Male   | Negative | Negative | No | No | No | 2nd dose     | Comirnaty (Biontech)     | Comirnaty (Biontech) | 11/6/2021 | 120 | None               | None                  |
| C4.379 | 4 | 45 | Female | Negative | Negative | No | No | No | 2nd dose     | Vaxzevria (Astra-Zeneca) | Comirnaty (Biontech) | 14/6/2021 | 117 | None               | None                  |
| C4.380 | 4 | 24 | Female | Negative | Negative | No | No | No | 2nd dose     | Comirnaty (Biontech)     | Comirnaty (Biontech) | 14/7/2021 | 87  | None               | None                  |
| C4.381 | 4 | 27 | Male   | Negative | Negative | No | No | No | 2nd dose     | Comirnaty (Biontech)     | Comirnaty (Biontech) | 21/6/2021 | 110 | Hypertension       | Metoprolol, enalapril |
| C4.382 | 4 | 42 | Female | Negative | Negative | No | No | No | 2nd dose     | Comirnaty (Biontech)     | Comirnaty (Biontech) | 15/6/2021 | 116 | None               | None                  |
| C4.383 | 4 | 33 | Female | Negative | Negative | No | No | No | Unvaccinated |                          |                      |           |     | None               | None                  |
| C4.384 | 4 | 25 | Female | Negative | Negative | No | No | No | 2nd dose     | Comirnaty (Biontech)     | Comirnaty (Biontech) | 5/7/2021  | 96  | Multiple sclerosis | Glatiramer acetate    |
| C4.385 | 4 | 23 | Female | Negative | Negative | No | No | No | 2nd dose     | Comirnaty (Biontech)     | Comirnaty (Biontech) | 28/7/2021 | 73  | None               | None                  |
| C4.386 | 4 | 28 | Male   | Negative | Negative | No | No | No | 2nd dose     | Comirnaty (Biontech)     | Comirnaty (Biontech) | 5/8/2021  | 65  | None               | None                  |
| C4.387 | 4 | 20 | Male   | Negative | Negative | No | No | No | 2nd dose     | Vaxzevria (Astra-Zeneca) | Comirnaty (Biontech) | 11/5/2021 | 151 | Asthma             | Salbutamol            |
| C4.388 | 4 | 25 | Female | Negative | Negative | No | No | No | 2nd dose     | Comirnaty (Biontech)     | Comirnaty (Biontech) | 30/6/2021 | 101 | None               | None                  |
| C4.389 | 4 | 26 | Female | Negative | Negative | No | No | No | 2nd dose     | Comirnaty (Biontech)     | Comirnaty (Biontech) | 7/7/2021  | 94  | None               | None                  |

|        |   |    |        |          |          |    |     |    |              |                          |                          |           |     |                 |                          |
|--------|---|----|--------|----------|----------|----|-----|----|--------------|--------------------------|--------------------------|-----------|-----|-----------------|--------------------------|
| C4.390 | 4 | 43 | Female | Negative | Negative | No | No  | No | 2nd dose     | Comirnaty (Biontech)     | Comirnaty (Biontech)     | 18/6/2021 | 113 | Diabetes        | Insulin                  |
| C4.391 | 4 | 28 | Male   | Negative | Negative | No | No  | No | 2nd dose     | Comirnaty (Biontech)     | Comirnaty (Biontech)     | 27/7/2021 | 74  | None            | None                     |
| C4.392 | 4 | 24 | Male   | Negative | Negative | No | No  | No | 2nd dose     | Comirnaty (Biontech)     | Comirnaty (Biontech)     | 20/7/2021 | 81  | None            | None                     |
| C4.393 | 4 | 43 | Male   | Negative | Negative | No | Yes | No | 1st dose     | Comirnaty (Biontech)     |                          | 16/8/2021 | 54  | None            | None                     |
| C4.394 | 4 | 22 | Female | Negative | Negative | No | No  | No | 2nd dose     | Vaxzevria (Astra-Zeneca) | Comirnaty (Biontech)     | 17/5/2021 | 145 | None            | None                     |
| C4.395 | 4 | 41 | Male   | Negative | Negative | No | No  | No | 2nd dose     | Covid-19 (Moderna)       | Covid-19 (Moderna)       | 30/7/2021 | 71  | None            | None                     |
| C4.396 | 4 | 42 | Female | Negative | Negative | No | No  | No | 2nd dose     | Covid-19 (Moderna)       | Covid-19 (Moderna)       | 25/7/2021 | 76  | None            | None                     |
| C4.397 | 4 | 23 | Female | Negative | Negative | No | No  | No | 2nd dose     | Covid-19 (Moderna)       | Covid-19 (Moderna)       | 25/7/2021 | 76  | None            | None                     |
| C4.398 | 4 | 38 | Female | Negative | Negative | No | No  | No | 2nd dose     | Comirnaty (Biontech)     | Comirnaty (Biontech)     | 29/5/2021 | 133 | Diabetes type 1 | None                     |
| C4.399 | 4 | 48 | Male   | Negative | Negative | No | No  | No | 2nd dose     | Comirnaty (Biontech)     | Comirnaty (Biontech)     | 30/7/2021 | 71  | None            | None                     |
| C4.400 | 4 | 44 | Female | Negative | Negative | No | No  | No | 2nd dose     | Comirnaty (Biontech)     | Comirnaty (Biontech)     | 14/7/2021 | 87  | None            | None                     |
| C4.401 | 4 | 50 | Female | Negative | Negative | No | No  | No | 1st dose     | Johnson & Johnson        |                          | 9/6/2021  | 122 | None            | None                     |
| C4.402 | 4 | 22 | Male   | Negative | Negative | No | No  | No | 2nd dose     | Comirnaty (Biontech)     | Comirnaty (Biontech)     | 4/2/2021  | 247 | None            | None                     |
| C4.403 | 4 | 30 | Male   | Negative | Negative | No | No  | No | 2nd dose     | Covid-19 (Moderna)       | Covid-19 (Moderna)       | 23/7/2021 | 78  | None            | None                     |
| C4.404 | 4 | 35 | Male   | Negative | Negative | No | No  | No | Unvaccinated |                          |                          |           |     | Hypertension    | Ramipril                 |
| C4.405 | 4 | 24 | Male   | Negative | Negative | No | Yes | No | 2nd dose     | Vaxzevria (Astra-Zeneca) | Vaxzevria (Astra-Zeneca) | 4/6/2021  | 127 | None            | None                     |
| C4.406 | 4 | 25 | Male   | Negative | Negative | No | No  | No | 1st dose     | Johnson & Johnson        |                          | 28/5/2021 | 134 | None            | None                     |
| C4.407 | 4 | 50 | Female | Negative | Negative | No | No  | No | 2nd dose     | Comirnaty (Biontech)     | Comirnaty (Biontech)     | 23/6/2021 | 108 | None            | None                     |
| C4.408 | 4 | 23 | Male   | Negative | Negative | No | No  | No | 2nd dose     | Comirnaty (Biontech)     | Comirnaty (Biontech)     | 9/7/2021  | 92  | None            | None                     |
| C4.409 | 4 | 21 | Female | Negative | Negative | No | No  | No | 2nd dose     | Comirnaty (Biontech)     | Comirnaty (Biontech)     | 4/8/2021  | 66  | None            | None                     |
| C4.410 | 4 | 21 | Female | Negative | Negative | No | No  | No | 2nd dose     | Comirnaty (Biontech)     | Comirnaty (Biontech)     | 8/6/2021  | 123 | None            | None                     |
| C4.411 | 4 | 51 | Male   | Negative | Negative | No | No  | No | 2nd dose     | Comirnaty (Biontech)     | Comirnaty (Biontech)     | N/A       | N/A | Hypertension    | Candesartan, simvastatin |

|        |   |    |        |          |          |    |    |    |          |                          |                          |           |     |           |             |
|--------|---|----|--------|----------|----------|----|----|----|----------|--------------------------|--------------------------|-----------|-----|-----------|-------------|
| C4.412 | 4 | 52 | Male   | Negative | Negative | No | No | No | 2nd dose | Comirnaty (Biontech)     | Comirnaty (Biontech)     | 15/7/2021 | 86  | None      | None        |
| C4.413 | 4 | 33 | Female | Negative | Negative | No | No | No | 2nd dose | Comirnaty (Biontech)     | Comirnaty (Biontech)     | 29/7/2021 | 72  | None      | None        |
| C4.414 | 4 | 31 | Male   | Negative | Negative | No | No | No | 2nd dose | Comirnaty (Biontech)     | Comirnaty (Biontech)     | 15/6/2021 | 116 | None      | None        |
| C4.415 | 4 | 28 | Female | Negative | Negative | No | No | No | 2nd dose | Comirnaty (Biontech)     | Comirnaty (Biontech)     | 27/1/2021 | 255 | None      | None        |
| C4.416 | 4 | 25 | Female | Negative | Negative | No | No | No | 2nd dose | Comirnaty (Biontech)     | Comirnaty (Biontech)     | 9/6/2021  | 122 | None      | None        |
| C4.417 | 4 | 37 | Male   | Negative | Negative | No | No | No | 2nd dose | Vaxzevria (Astra-Zeneca) | Vaxzevria (Astra-Zeneca) | 16/6/2021 | 115 | None      | None        |
| C4.418 | 4 | 27 | Male   | Negative | Negative | No | No | No | 2nd dose | Covid-19 (Moderna)       | Covid-19 (Moderna)       | 11/6/2021 | 120 | None      | None        |
| C4.419 | 4 | 25 | Female | Negative | Negative | No | No | No | 2nd dose | Comirnaty (Biontech)     | Comirnaty (Biontech)     | 13/7/2021 | 88  | None      | None        |
| C4.420 | 4 | 24 | Female | Negative | Negative | No | No | No | 2nd dose | Comirnaty (Biontech)     | Comirnaty (Biontech)     | 6/10/2021 | 3   | None      | None        |
| C4.421 | 4 | 24 | Female | Negative | Negative | No | No | No | 2nd dose | Comirnaty (Biontech)     | Comirnaty (Biontech)     | 22/7/2021 | 79  | None      | None        |
| C4.422 | 4 | 34 | Female | Negative | Negative | No | No | No | 2nd dose | Comirnaty (Biontech)     | Comirnaty (Biontech)     | 23/6/2021 | 108 | Hashimoto | L-thyroxine |
| C4.423 | 4 | 23 | Female | Negative | Negative | No | No | No | 2nd dose | Vaxzevria (Astra-Zeneca) | Comirnaty (Biontech)     | 18/6/2021 | 113 | None      | None        |
| C4.424 | 4 | 41 | Female | Negative | Negative | No | No | No | 2nd dose | Covid-19 (Moderna)       | Covid-19 (Moderna)       | 12/8/2021 | 58  | None      | None        |
| C4.425 | 4 | 32 | Male   | Negative | Negative | No | No | No | 2nd dose | Covid-19 (Moderna)       | Covid-19 (Moderna)       | 5/5/2021  | 157 | None      | None        |
| C4.426 | 4 | 45 | Female | Negative | Negative | No | No | No | 2nd dose | Covid-19 (Moderna)       | Covid-19 (Moderna)       | 28/4/2021 | 164 | None      | None        |
| C4.427 | 4 | 27 | Male   | Negative | Negative | No | No | No | 1st dose | Johnson & Johnson        |                          | 26/5/2021 | 136 | None      | None        |
| C4.428 | 4 | 26 | Male   | Negative | Negative | No | No | No | 2nd dose | Vaxzevria (Astra-Zeneca) | Vaxzevria (Astra-Zeneca) | 14/6/2021 | 117 | None      | None        |
| C4.429 | 4 | 20 | Female | Negative | Negative | No | No | No | 2nd dose | Covid-19 (Moderna)       | Covid-19 (Moderna)       | 28/7/2021 | 73  | None      | None        |
| C4.430 | 4 | 18 | Female | Negative | Negative | No | No | No | 2nd dose | Comirnaty (Biontech)     | Comirnaty (Biontech)     | 29/5/2021 | 133 | None      | None        |
| C4.431 | 4 | 18 | Female | Negative | Negative | No | No | No | 2nd dose | Comirnaty (Biontech)     | Comirnaty (Biontech)     | N/A       | N/A | None      | None        |
| C4.432 | 4 | 22 | Female | Negative | Negative | No | No | No | 2nd dose | Comirnaty (Biontech)     | Comirnaty (Biontech)     | 9/6/2021  | 122 | None      | None        |



|        |   |    |        |          |          |    |        |    |              |                          |                      |           |     |                  |             |
|--------|---|----|--------|----------|----------|----|--------|----|--------------|--------------------------|----------------------|-----------|-----|------------------|-------------|
| C4.433 | 4 | 26 | Female | Negative | Negative | No | No     | No | 2nd dose     | Comirnaty (Biontech)     | Comirnaty (Biontech) | 5/2/2021  | 246 | None             | None        |
| C4.434 | 4 | 22 | Female | Negative | Negative | No | No     | No | 2nd dose     | Comirnaty (Biontech)     | Comirnaty (Biontech) | 26/7/2021 | 75  | None             | None        |
| C4.435 | 4 | 39 | Male   | Negative | Negative | No | No     | No | 1st dose     | Comirnaty (Biontech)     |                      | 2/9/2021  | 37  | None             | None        |
| C4.436 | 4 | 22 | Female | Negative | Negative | No | No     | No | 2nd dose     | Vaxzevria (Astra-Zeneca) | Comirnaty (Biontech) | 3/5/2021  | 159 | None             | None        |
| C4.437 | 4 | 25 | Male   | Negative | Negative | No | No     | No | 2nd dose     | Covid-19 (Moderna)       | Covid-19 (Moderna)   | 3/6/2021  | 128 | None             | None        |
| C4.438 | 4 | 39 | Male   | Negative | Negative | No | No     | No | 2nd dose     | Comirnaty (Biontech)     | Comirnaty (Biontech) | 16/7/2021 | 85  | None             | None        |
| C4.439 | 4 | 38 | Female | Negative | Negative | No | No     | No | 2nd dose     | Comirnaty (Biontech)     | Comirnaty (Biontech) | 10/9/2021 | 29  | None             | None        |
| C4.440 | 4 | 28 | Male   | Negative | Negative | No | No     | No | 2nd dose     | Covid-19 (Moderna)       | Covid-19 (Moderna)   | 3/6/2021  | 128 | None             | None        |
| C4.441 | 4 | 22 | Female | Negative | Negative | No | No     | No | 2nd dose     | Comirnaty (Biontech)     | Comirnaty (Biontech) | 8/7/2021  | 93  | None             | None        |
| C4.442 | 4 | 26 | Female | Negative | Negative | No | No     | No | 2nd dose     | Vaxzevria (Astra-Zeneca) | Comirnaty (Biontech) | 11/3/2021 | 212 | Hashimoto        | L-thyroxine |
| C4.443 | 4 | 34 | Female | Negative | Negative | No | No     | No | Unvaccinated |                          |                      |           |     | Bronchial asthma | Salbutamol  |
| C4.444 | 4 | 52 | Male   | Negative | Negative | No | No     | No | 2nd dose     | Comirnaty (Biontech)     | Comirnaty (Biontech) | 15/8/2021 | 55  | None             | None        |
| C4.445 | 4 | 39 | Female | Negative | Negative | No | Unsure | No | Unvaccinated |                          |                      |           |     | None             | Citalopram  |
| C4.446 | 4 | 23 | Female | Negative | Negative | No | No     | No | 2nd dose     | Comirnaty (Biontech)     | Comirnaty (Biontech) | 23/6/2021 | 108 | None             | None        |
| C4.447 | 4 | 31 | Male   | Negative | Negative | No | No     | No | 2nd dose     | Comirnaty (Biontech)     | Comirnaty (Biontech) | 4/6/2021  | 127 | Hypertension     | Ramipril    |
| C4.448 | 4 | 41 | Female | Negative | Negative | No | No     | No | 2nd dose     | Covid-19 (Moderna)       | Covid-19 (Moderna)   | 20/9/2021 | 19  | Hashimoto        | L-thyroxine |
| C4.449 | 4 | 38 | Male   | Negative | Negative | No | No     | No | 2nd dose     | Comirnaty (Biontech)     | Comirnaty (Biontech) | 18/8/2021 | 52  | None             | None        |
| C4.450 | 4 | 38 | Female | Negative | Negative | No | No     | No | 2nd dose     | Covid-19 (Moderna)       | Covid-19 (Moderna)   | 15/7/2021 | 86  | None             | None        |
| C4.451 | 4 | 22 | Female | Negative | Negative | No | No     | No | 2nd dose     | Comirnaty (Biontech)     | Comirnaty (Biontech) | 9/6/2021  | 122 | None             | None        |
| C4.452 | 4 | 56 | Female | Negative | Negative | No | No     | No | 2nd dose     | Comirnaty (Biontech)     | Comirnaty (Biontech) | 15/6/2021 | 116 | None             | None        |
| C4.453 | 4 | 30 | Male   | Negative | Negative | No | No     | No | 2nd dose     | Comirnaty (Biontech)     | Comirnaty (Biontech) | 16/7/2021 | 85  | None             | None        |
| C4.454 | 4 | 58 | Female | Negative | Negative | No | No     | No | 2nd dose     | Comirnaty (Biontech)     | Comirnaty (Biontech) | 19/6/2021 | 112 | Asthma           | Salbutamol  |

|        |   |    |        |          |          |    |     |    |              |                          |                          |           |     |                         |              |
|--------|---|----|--------|----------|----------|----|-----|----|--------------|--------------------------|--------------------------|-----------|-----|-------------------------|--------------|
| C4.455 | 4 | 27 | Female | Negative | Negative | No | No  | No | 2nd dose     | Covid-19 (Moderna)       | Covid-19 (Moderna)       | 25/7/2021 | 76  | None                    | None         |
| C4.456 | 4 | 24 | Female | Negative | Negative | No | No  | No | 2nd dose     | Comirnaty (Biontech)     | Comirnaty (Biontech)     | 17/9/2021 | 22  | Asthma, neurodermatitis | None         |
| C4.457 | 4 | 39 | Male   | Negative | Negative | No | No  | No | 2nd dose     | Comirnaty (Biontech)     | Comirnaty (Biontech)     | 27/7/2021 | 74  | None                    | None         |
| C4.458 | 4 | 27 | Male   | Negative | Negative | No | No  | No | 2nd dose     | Covid-19 (Moderna)       | Covid-19 (Moderna)       | 13/8/2021 | 57  | None                    | None         |
| C4.459 | 4 | 39 | Male   | Negative | Negative | No | No  | No | 2nd dose     | Comirnaty (Biontech)     | Comirnaty (Biontech)     | 9/6/2021  | 122 | None                    | None         |
| C4.460 | 4 | 20 | Female | Negative | Negative | No | No  | No | 2nd dose     | Comirnaty (Biontech)     | Comirnaty (Biontech)     | 16/7/2021 | 85  | None                    | None         |
| C4.461 | 4 | 38 | Male   | Negative | Negative | No | Yes | No | 2nd dose     | Comirnaty (Biontech)     | Comirnaty (Biontech)     | 23/6/2021 | 108 | None                    | None         |
| C4.462 | 4 | 19 | Female | Negative | Negative | No | No  | No | 2nd dose     | Comirnaty (Biontech)     | Comirnaty (Biontech)     | 6/8/2021  | 64  | None                    | None         |
| C4.463 | 4 | 24 | Female | Negative | Negative | No | No  | No | 2nd dose     | Covid-19 (Moderna)       | Covid-19 (Moderna)       | 5/6/2021  | 126 | None                    | None         |
| C4.464 | 4 | 26 | Male   | Negative | Negative | No | No  | No | 2nd dose     | Vaxzevria (Astra-Zeneca) | Vaxzevria (Astra-Zeneca) | 2/7/2021  | 99  | None                    | None         |
| C4.465 | 4 | 26 | Female | Negative | Negative | No | No  | No | 2nd dose     | Comirnaty (Biontech)     | Comirnaty (Biontech)     | 19/7/2021 | 82  | None                    | None         |
| C4.466 | 4 | 53 | Female | Negative | Negative | No | No  | No | 2nd dose     | Comirnaty (Biontech)     | Comirnaty (Biontech)     | 21/5/2021 | 141 | None                    | None         |
| C4.467 | 4 | 24 | Female | Negative | Negative | No | No  | No | 2nd dose     | Covid-19 (Moderna)       | Covid-19 (Moderna)       | 25/7/2021 | 76  | None                    | None         |
| C4.468 | 4 | 24 | Female | Negative | Negative | No | No  | No | 2nd dose     | Vaxzevria (Astra-Zeneca) | Comirnaty (Biontech)     | 27/5/2021 | 135 | None                    | None         |
| C4.469 | 4 | 30 | Female | Negative | Negative | No | Yes | No | 1st dose     | Comirnaty (Biontech)     |                          | 2/9/2021  | 37  | Rheumatism              | Methotrexate |
| C4.470 | 4 | 23 | Male   | Negative | Negative | No | No  | No | 2nd dose     | Comirnaty (Biontech)     | Comirnaty (Biontech)     | N/A       | N/A | Bronchial asthma        | None         |
| C4.471 | 4 | 35 | Male   | Negative | Negative | No | No  | No | 2nd dose     | Covid-19 (Moderna)       | Covid-19 (Moderna)       | 16/7/2021 | 85  | None                    | None         |
| C4.472 | 4 | 23 | Male   | Negative | Negative | No | No  | No | 2nd dose     | Comirnaty (Biontech)     | Comirnaty (Biontech)     | 21/8/2021 | 49  | None                    | None         |
| C4.473 | 4 | 30 | Female | Negative | Negative | No | No  | No | Unvaccinated |                          |                          |           |     | None                    | None         |
| C4.474 | 4 | 25 | Female | Negative | Negative | No | No  | No | 2nd dose     | Comirnaty (Biontech)     | Comirnaty (Biontech)     | 21/7/2021 | 80  | None                    | None         |
| C4.475 | 4 | 25 | Female | Negative | Negative | No | Yes | No | 1st dose     | Comirnaty (Biontech)     |                          | 4/9/2021  | 35  | None                    | None         |
| C4.476 | 4 | 30 | Female | Negative | Negative | No | No  | No | 2nd dose     | Comirnaty (Biontech)     | Comirnaty (Biontech)     | 14/6/2021 | 117 | None                    | None         |

|        |   |    |        |          |          |    |        |    |              |                          |                          |           |     |                        |                            |
|--------|---|----|--------|----------|----------|----|--------|----|--------------|--------------------------|--------------------------|-----------|-----|------------------------|----------------------------|
| C4.477 | 4 | 29 | Male   | Negative | Negative | No | No     | No | 2nd dose     | Comirnaty (Biontech)     | Comirnaty (Biontech)     | 30/7/2021 | 71  | None                   | None                       |
| C4.478 | 4 | 28 | Male   | Negative | Negative | No | No     | No | 2nd dose     | Comirnaty (Biontech)     | Comirnaty (Biontech)     | 20/7/2021 | 81  | None                   | None                       |
| C4.479 | 4 | 37 | Male   | Negative | Negative | No | No     | No | 2nd dose     | Comirnaty (Biontech)     | Comirnaty (Biontech)     | 16/6/2021 | 115 | None                   | None                       |
| C4.480 | 4 | 28 | Female | Negative | Negative | No | No     | No | 2nd dose     | Comirnaty (Biontech)     | Comirnaty (Biontech)     | N/A       | N/A | None                   | None                       |
| C4.481 | 4 | 19 | Female | Negative | Negative | No | No     | No | 2nd dose     | Comirnaty (Biontech)     | Comirnaty (Biontech)     | 16/6/2021 | 115 | None                   | None                       |
| C4.482 | 4 | 19 | Female | Negative | Negative | No | No     | No | 2nd dose     | Covid-19 (Moderna)       | Covid-19 (Moderna)       | 9/8/2021  | 61  | None                   | None                       |
| C4.483 | 4 | 22 | Male   | Negative | Negative | No | No     | No | 2nd dose     | Comirnaty (Biontech)     | Comirnaty (Biontech)     | 9/8/2021  | 61  | None                   | None                       |
| C4.484 | 4 | 24 | Female | Negative | Negative | No | No     | No | 2nd dose     | Vaxzevria (Astra-Zeneca) | Comirnaty (Biontech)     | 18/6/2021 | 113 | None                   | None                       |
| C4.485 | 4 | 22 | Male   | Negative | Negative | No | No     | No | 2nd dose     | Comirnaty (Biontech)     | Comirnaty (Biontech)     | N/A       | N/A | None                   | None                       |
| C4.486 | 4 | 42 | Female | Negative | Negative | No | No     | No | 2nd dose     | Comirnaty (Biontech)     | Comirnaty (Biontech)     | 23/6/2021 | 108 | None                   | None                       |
| C4.487 | 4 | 33 | Female | Negative | Negative | No | No     | No | 2nd dose     | Comirnaty (Biontech)     | Comirnaty (Biontech)     | 8/6/2021  | 123 | None                   | None                       |
| C4.488 | 4 | 30 | Male   | Negative | Negative | No | No     | No | 2nd dose     | Comirnaty (Biontech)     | Comirnaty (Biontech)     | 23/8/2021 | 47  | None                   | None                       |
| C4.489 | 4 | 24 | Male   | Negative | Negative | No | No     | No | 2nd dose     | Comirnaty (Biontech)     | Comirnaty (Biontech)     | 29/7/2021 | 72  | None                   | None                       |
| C4.490 | 4 | 26 | Female | Negative | Negative | No | No     | No | 2nd dose     | Comirnaty (Biontech)     | Comirnaty (Biontech)     | 12/6/2021 | 119 | None                   | None                       |
| C4.491 | 4 | 48 | Female | Negative | Negative | No | No     | No | 2nd dose     | Comirnaty (Biontech)     | Comirnaty (Biontech)     | 21/6/2021 | 110 | Hypertension, diabetes | Antihypertensives, insulin |
| C4.492 | 4 | 26 | Female | Negative | Negative | No | No     | No | Unvaccinated |                          |                          |           |     | None                   | None                       |
| C4.493 | 4 | 23 | Female | Negative | Negative | No | Unsure | No | 2nd dose     | Comirnaty (Biontech)     | Comirnaty (Biontech)     | 4/6/2021  | 127 | None                   | None                       |
| C4.494 | 4 | 42 | Male   | Negative | Negative | No | No     | No | 2nd dose     | Covid-19 (Moderna)       | Covid-19 (Moderna)       | 19/8/2021 | 51  | Crohn's disease        | Diverse                    |
| C4.495 | 4 | 27 | Female | Negative | Negative | No | No     | No | Unvaccinated |                          |                          |           |     | None                   | None                       |
| C4.496 | 4 | 41 | Female | Negative | Negative | No | No     | No | Unvaccinated |                          |                          |           |     | None                   | None                       |
| C4.497 | 4 | 24 | Female | Negative | Negative | No | No     | No | 2nd dose     | Vaxzevria (Astra-Zeneca) | Vaxzevria (Astra-Zeneca) | 11/5/2021 | 151 | Diabetes               | Insulin                    |
| C4.498 | 4 | 27 | Female | Negative | Negative | No | No     | No | 2nd dose     | Comirnaty (Biontech)     | Comirnaty (Biontech)     | 28/6/2021 | 103 | None                   | None                       |

|        |   |    |        |          |          |    |    |    |              |                          |                          |           |     |                 |             |
|--------|---|----|--------|----------|----------|----|----|----|--------------|--------------------------|--------------------------|-----------|-----|-----------------|-------------|
| C4.499 | 4 | 54 | Female | Negative | Negative | No | No | No | 2nd dose     | Comirnaty (Biontech)     | Comirnaty (Biontech)     | 8/7/2021  | 93  | None            | None        |
| C4.500 | 4 | 27 | Male   | Negative | Negative | No | No | No | 2nd dose     | Comirnaty (Biontech)     | Comirnaty (Biontech)     | 8/7/2021  | 93  | None            | None        |
| C4.501 | 4 | 27 | Female | Negative | Negative | No | No | No | 2nd dose     | Comirnaty (Biontech)     | Comirnaty (Biontech)     | 30/5/2021 | 132 | None            | None        |
| C4.502 | 4 | 26 | Male   | Negative | Negative | No | No | No | Unvaccinated |                          |                          |           |     | None            | None        |
| C4.503 | 4 | 20 | Female | Negative | Negative | No | No | No | 2nd dose     | Comirnaty (Biontech)     | Comirnaty (Biontech)     | 11/6/2021 | 120 | None            | None        |
| C4.504 | 4 | 20 | Male   | Negative | Negative | No | No | No | 2nd dose     | Comirnaty (Biontech)     | Comirnaty (Biontech)     | 6/8/2021  | 64  | None            | None        |
| C4.505 | 4 | 43 | Male   | Negative | Negative | No | No | No | 2nd dose     | Comirnaty (Biontech)     | Comirnaty (Biontech)     | 23/6/2021 | 108 | None            | None        |
| C4.506 | 4 | 38 | Male   | Negative | Negative | No | No | No | 2nd dose     | Covid-19 (Moderna)       | Covid-19 (Moderna)       | 15/7/2021 | 86  | None            | None        |
| C4.507 | 4 | 44 | Female | Negative | Negative | No | No | No | 1st dose     | Johnson & Johnson        |                          | 11/6/2021 | 120 | None            | None        |
| C4.508 | 4 | 38 | Female | Negative | Negative | No | No | No | 2nd dose     | Comirnaty (Biontech)     | Comirnaty (Biontech)     | 15/6/2021 | 116 | None            | None        |
| C4.509 | 4 | 28 | Female | Negative | Negative | No | No | No | 2nd dose     | Vaxzevria (Astra-Zeneca) | Vaxzevria (Astra-Zeneca) | 3/5/2021  | 159 | Mental disorder | Milnacipran |
| C4.510 | 4 | 21 | Male   | Negative | Negative | No | No | No | 1st dose     | Johnson & Johnson        |                          | 15/6/2021 | 116 | None            | None        |
| C4.511 | 4 | 36 | Male   | Negative | Negative | No | No | No | 2nd dose     | Comirnaty (Biontech)     | Comirnaty (Biontech)     | 28/7/2021 | 73  | None            | None        |
| C4.512 | 4 | 49 | Male   | Negative | Negative | No | No | No | 1st dose     | Johnson & Johnson        |                          | 10/6/2021 | 121 | None            | None        |
| C4.513 | 4 | 40 | Female | Negative | Negative | No | No | No | Unvaccinated |                          |                          |           |     | None            | None        |
| C4.514 | 4 | 18 | Male   | Negative | Negative | No | No | No | 2nd dose     | Comirnaty (Biontech)     | Comirnaty (Biontech)     | 8/7/2021  | 93  | None            | None        |
| C4.515 | 4 | 24 | Male   | Negative | Negative | No | No | No | 2nd dose     | Comirnaty (Biontech)     | Comirnaty (Biontech)     | 20/8/2021 | 50  | None            | None        |
| C4.516 | 4 | 28 | Male   | Negative | Negative | No | No | No | 2nd dose     | Comirnaty (Biontech)     | Comirnaty (Biontech)     | 20/5/2021 | 142 | None            | None        |
| C4.517 | 4 | 34 | Male   | Negative | Negative | No | No | No | 2nd dose     | Comirnaty (Biontech)     | Comirnaty (Biontech)     | 5/7/2021  | 96  | None            | None        |
| C4.518 | 4 | 22 | Female | Negative | Negative | No | No | No | 2nd dose     | Comirnaty (Biontech)     | Comirnaty (Biontech)     | 5/8/2021  | 65  | None            | None        |
| C4.519 | 4 | 27 | Male   | Negative | Negative | No | No | No | 2nd dose     | Covid-19 (Moderna)       | Covid-19 (Moderna)       | 27/7/2021 | 74  | None            | None        |
| C4.520 | 4 | 36 | Female | Negative | Negative | No | No | No | 2nd dose     | Comirnaty (Biontech)     | Comirnaty (Biontech)     | 1/7/2021  | 100 | None            | None        |
| C4.521 | 4 | 26 | Male   | Negative | Negative | No | No | No | 2nd dose     | Comirnaty (Biontech)     | Comirnaty (Biontech)     | 19/5/2021 | 143 | None            | None        |

|        |   |    |        |          |          |    |     |    |              |                          |                          |           |     |                 |      |
|--------|---|----|--------|----------|----------|----|-----|----|--------------|--------------------------|--------------------------|-----------|-----|-----------------|------|
| C4.522 | 4 | 30 | Female | Negative | Negative | No | No  | No | 2nd dose     | Comirnaty (Biontech)     | Comirnaty (Biontech)     | 21/5/2021 | 141 | None            | None |
| C4.523 | 4 | 21 | Female | Negative | Negative | No | No  | No | 2nd dose     | Comirnaty (Biontech)     | Comirnaty (Biontech)     | 13/7/2021 | 88  | None            | None |
| C4.524 | 4 | 31 | Male   | Negative | Negative | No | No  | No | 2nd dose     | Comirnaty (Biontech)     | Comirnaty (Biontech)     | 2/8/2021  | 68  | Diabetes type 2 | None |
| C4.525 | 4 | 31 | Male   | Negative | Negative | No | No  | No | 2nd dose     | Comirnaty (Biontech)     | Comirnaty (Biontech)     | 2/9/2021  | 37  | None            | None |
| C4.526 | 4 | 37 | Male   | Negative | Negative | No | No  | No | 2nd dose     | Vaxzevria (Astra-Zeneca) | Comirnaty (Biontech)     | 5/7/2021  | 96  | None            | None |
| C4.527 | 4 | 25 | Female | Negative | Negative | No | No  | No | 1st dose     | Johnson & Johnson        |                          | 2/6/2021  | 129 | None            | None |
| C4.528 | 4 | 25 | Female | Negative | Negative | No | No  | No | 2nd dose     | Comirnaty (Biontech)     | Comirnaty (Biontech)     | 20/7/2021 | 81  | None            | None |
| C4.529 | 4 | 29 | Male   | Negative | Negative | No | No  | No | 1st dose     | Johnson & Johnson        |                          | 5/7/2021  | 96  | None            | None |
| C4.530 | 4 | 22 | Female | Negative | Negative | No | No  | No | Unvaccinated |                          |                          |           |     | None            | None |
| C4.531 | 4 | 31 | Female | Negative | Negative | No | No  | No | 2nd dose     | Comirnaty (Biontech)     | Comirnaty (Biontech)     | 21/9/2021 | 18  | None            | None |
| C4.532 | 4 | 22 | Female | Negative | Negative | No | No  | No | 2nd dose     | Comirnaty (Biontech)     | Comirnaty (Biontech)     | 7/7/2021  | 94  | None            | None |
| C4.533 | 4 | 26 | Male   | Negative | Negative | No | No  | No | 2nd dose     | Comirnaty (Biontech)     | Comirnaty (Biontech)     | 17/6/2021 | 114 | None            | None |
| C4.534 | 4 | 21 | Female | Negative | Negative | No | No  | No | 2nd dose     | Comirnaty (Biontech)     | Comirnaty (Biontech)     | 30/7/2021 | 71  | None            | None |
| C4.535 | 4 | 31 | Male   | Negative | Negative | No | No  | No | 2nd dose     | Comirnaty (Biontech)     | Comirnaty (Biontech)     | 26/8/2021 | 44  | None            | None |
| C4.536 | 4 | 24 | Female | Negative | Negative | No | No  | No | 2nd dose     | Comirnaty (Biontech)     | Comirnaty (Biontech)     | 11/6/2021 | 120 | None            | None |
| C4.537 | 4 | 24 | Female | Negative | Negative | No | No  | No | 1st dose     | Johnson & Johnson        |                          | N/A       | N/A | None            | None |
| C4.538 | 4 | 25 | Female | Negative | Negative | No | No  | No | 1st dose     | Johnson & Johnson        |                          | 2/6/2021  | 129 | None            | None |
| C4.539 | 4 | 27 | Male   | Negative | Negative | No | No  | No | 2nd dose     | Covid-19 (Moderna)       | Covid-19 (Moderna)       | 14/9/2021 | 25  | None            | None |
| C4.540 | 4 | 27 | Female | Negative | Negative | No | No  | No | 2nd dose     | Covid-19 (Moderna)       | Covid-19 (Moderna)       | 3/9/2021  | 36  | None            | None |
| C4.541 | 4 | 24 | Female | Negative | Negative | No | No  | No | 2nd dose     | Comirnaty (Biontech)     | Comirnaty (Biontech)     | 28/7/2021 | 73  | None            | None |
| C4.542 | 4 | 26 | Female | Negative | Negative | No | Yes | No | 2nd dose     | Comirnaty (Biontech)     | Comirnaty (Biontech)     | 28/9/2021 | 11  | None            | None |
| C4.543 | 4 | 28 | Male   | Negative | Negative | No | No  | No | 2nd dose     | Vaxzevria (Astra-Zeneca) | Vaxzevria (Astra-Zeneca) | 19/7/2021 | 82  | None            | None |

|        |   |    |        |          |          |    |     |    |              |                          |                      |           |     |                 |            |
|--------|---|----|--------|----------|----------|----|-----|----|--------------|--------------------------|----------------------|-----------|-----|-----------------|------------|
| C4.544 | 4 | 23 | Female | Negative | Negative | No | No  | No | 1st dose     | Comirnaty (Biontech)     |                      | 15/9/2021 | 24  | None            | None       |
| C4.545 | 4 | 30 | Female | Negative | Negative | No | No  | No | 2nd dose     | Comirnaty (Biontech)     | Comirnaty (Biontech) | N/A       | N/A | None            | None       |
| C4.546 | 4 | 29 | Male   | Negative | Negative | No | Yes | No | 2nd dose     | Comirnaty (Biontech)     | Comirnaty (Biontech) | 12/8/2021 | 58  | Hypertension    | None       |
| C4.547 | 4 | 44 | Female | Negative | Negative | No | No  | No | 1st dose     | Johnson & Johnson        |                      | 2/6/2021  | 129 | None            | None       |
| C4.548 | 4 | 24 | Male   | Negative | Negative | No | No  | No | 2nd dose     | Comirnaty (Biontech)     | Comirnaty (Biontech) | 1/8/2021  | 69  | None            | None       |
| C4.549 | 4 | 24 | Male   | Negative | Negative | No | No  | No | 1st dose     | Johnson & Johnson        |                      | 10/6/2021 | 121 | None            | None       |
| C4.550 | 4 | 28 | Female | Negative | Negative | No | No  | No | 2nd dose     | Comirnaty (Biontech)     | Comirnaty (Biontech) | 30/7/2021 | 71  | Mental disorder | Sertraline |
| C4.551 | 4 | 25 | Male   | Negative | Negative | No | No  | No | 2nd dose     | Comirnaty (Biontech)     | Comirnaty (Biontech) | 7/7/2021  | 94  | None            | None       |
| C4.552 | 4 | 27 | Male   | Negative | Negative | No | No  | No | 1st dose     | Johnson & Johnson        |                      | 28/5/2021 | 134 | None            | None       |
| C4.553 | 4 | 19 | Female | Negative | Negative | No | No  | No | 2nd dose     | Comirnaty (Biontech)     | Comirnaty (Biontech) | 2/6/2021  | 129 | None            | None       |
| C4.554 | 4 | 24 | Male   | Negative | Negative | No | No  | No | 2nd dose     | Comirnaty (Biontech)     | Comirnaty (Biontech) | 1/8/2021  | 69  | None            | None       |
| C4.555 | 4 | 19 | Female | Negative | Negative | No | No  | No | 2nd dose     | Covid-19 (Moderna)       | Covid-19 (Moderna)   | 19/8/2021 | 51  | None            | None       |
| C4.556 | 4 | 33 | Female | Negative | Negative | No | No  | No | 2nd dose     | Covid-19 (Moderna)       | Covid-19 (Moderna)   | 28/5/2021 | 134 | None            | None       |
| C4.557 | 4 | 28 | Female | Negative | Negative | No | No  | No | 2nd dose     | Comirnaty (Biontech)     | Comirnaty (Biontech) | 1/6/2021  | 130 | None            | None       |
| C4.558 | 4 | 29 | Male   | Negative | Negative | No | No  | No | 2nd dose     | Vaxzevria (Astra-Zeneca) | Comirnaty (Biontech) | 13/7/2021 | 88  | None            | None       |
| C4.559 | 4 | 20 | Male   | Negative | Negative | No | No  | No | 2nd dose     | Vaxzevria (Astra-Zeneca) | Comirnaty (Biontech) | 23/8/2021 | 47  | None            | None       |
| C4.560 | 4 | 53 | Male   | Negative | Negative | No | No  | No | 2nd dose     | Comirnaty (Biontech)     | Comirnaty (Biontech) | 30/6/2021 | 101 | None            | None       |
| C4.561 | 4 | 36 | Male   | Negative | Negative | No | Yes | No | 1st dose     | Johnson & Johnson        |                      | 24/8/2021 | 46  | None            | None       |
| C4.562 | 4 | 43 | Male   | Negative | Negative | No | No  | No | Unvaccinated |                          |                      |           |     | None            | None       |
| C4.563 | 4 | 23 | Male   | Negative | Negative | No | No  | No | 1st dose     | Johnson & Johnson        |                      | 13/6/2021 | 118 | None            | None       |
| C4.564 | 4 | 23 | Female | Negative | Negative | No | No  | No | 1st dose     | Johnson & Johnson        |                      | 15/6/2021 | 116 | None            | None       |

|        |   |    |        |          |          |    |        |    |          |                          |                          |           |     |                          |                          |
|--------|---|----|--------|----------|----------|----|--------|----|----------|--------------------------|--------------------------|-----------|-----|--------------------------|--------------------------|
| C4.565 | 4 | 50 | Female | Negative | Negative | No | No     | No | 2nd dose | Vaxzevria (Astra-Zeneca) | Covid-19 (Moderna)       | 25/6/2021 | 106 | None                     | None                     |
| C4.566 | 4 | 54 | Female | Negative | Negative | No | No     | No | 2nd dose | Covid-19 (Moderna)       | Covid-19 (Moderna)       | 25/5/2021 | 137 | Hypertension, no thyroid | Candesartan, l-thyroxine |
| C4.567 | 4 | 37 | Female | Negative | Negative | No | No     | No | 1st dose | Comirnaty (Biontech)     |                          | 10/9/2021 | 29  | None                     | None                     |
| C4.568 | 4 | 22 | Female | Negative | Negative | No | No     | No | 2nd dose | Comirnaty (Biontech)     | Comirnaty (Biontech)     | 15/7/2021 | 86  | None                     | None                     |
| C4.569 | 4 | 30 | Male   | Negative | Negative | No | No     | No | 2nd dose | Comirnaty (Biontech)     | Comirnaty (Biontech)     | 21/7/2021 | 80  | None                     | None                     |
| C4.570 | 4 | 23 | Male   | Negative | Negative | No | No     | No | 2nd dose | Vaxzevria (Astra-Zeneca) | Vaxzevria (Astra-Zeneca) | 12/8/2021 | 58  | None                     | None                     |
| C4.571 | 4 | 27 | Female | Negative | Negative | No | No     | No | 2nd dose | Comirnaty (Biontech)     | Comirnaty (Biontech)     | 17/6/2021 | 114 | None                     | None                     |
| C4.572 | 4 | 47 | Female | Negative | Negative | No | No     | No | 2nd dose | Comirnaty (Biontech)     | Comirnaty (Biontech)     | 25/6/2021 | 106 | Hypertension             | Ramipril                 |
| C4.573 | 4 | 27 | Female | Negative | Negative | No | No     | No | 2nd dose | Vaxzevria (Astra-Zeneca) | Vaxzevria (Astra-Zeneca) | 3/5/2021  | 159 | None                     | None                     |
| C4.574 | 4 | 39 | Male   | Negative | Negative | No | No     | No | 2nd dose | Comirnaty (Biontech)     | Comirnaty (Biontech)     | 29/6/2021 | 102 | None                     | None                     |
| C4.575 | 4 | 41 | Male   | Negative | Negative | No | No     | No | 2nd dose | Comirnaty (Biontech)     | Comirnaty (Biontech)     | 18/8/2021 | 52  | None                     | None                     |
| C4.576 | 4 | 21 | Male   | Negative | Negative | No | No     | No | 2nd dose | Covid-19 (Moderna)       | Covid-19 (Moderna)       | 20/7/2021 | 81  | None                     | None                     |
| C4.577 | 4 | 38 | Female | Negative | Negative | No | No     | No | 2nd dose | Vaxzevria (Astra-Zeneca) | Comirnaty (Biontech)     | 29/5/2021 | 133 | None                     | None                     |
| C4.578 | 4 | 18 | Male   | Negative | Negative | No | Unsure | No | 1st dose | Comirnaty (Biontech)     |                          | 30/8/2021 | 40  | Hypertension             | None                     |
| C4.579 | 4 | 24 | Female | Negative | Negative | No | No     | No | 2nd dose | Comirnaty (Biontech)     | Comirnaty (Biontech)     | 18/5/2021 | 144 | None                     | None                     |
| C4.580 | 4 | 22 | Female | Negative | Negative | No | No     | No | 2nd dose | Vaxzevria (Astra-Zeneca) | Covid-19 (Moderna)       | 23/5/2021 | 139 | None                     | None                     |
| C4.581 | 4 | 37 | Female | Negative | Negative | No | No     | No | 2nd dose | Covid-19 (Moderna)       | Covid-19 (Moderna)       | 8/7/2021  | 93  | None                     | None                     |
| C4.582 | 4 | 20 | Male   | Negative | Negative | No | No     | No | 1st dose | Johnson & Johnson        |                          | 25/6/2021 | 106 | None                     | None                     |
| C4.583 | 4 | 43 | Female | Negative | Negative | No | No     | No | 2nd dose | Vaxzevria (Astra-Zeneca) | Comirnaty (Biontech)     | 27/7/2021 | 74  | None                     | None                     |

|        |   |    |        |          |          |    |        |    |              |                          |                      |           |     |                                  |                          |
|--------|---|----|--------|----------|----------|----|--------|----|--------------|--------------------------|----------------------|-----------|-----|----------------------------------|--------------------------|
| C4.584 | 4 | 44 | Female | Negative | Negative | No | No     | No | 2nd dose     | Comirnaty (Biontech)     | Comirnaty (Biontech) | 30/6/2021 | 101 | Multiple sclerosis, collagenosis | Ocrelizumab, pain killer |
| C4.585 | 4 | 43 | Female | Negative | Negative | No | No     | No | 2nd dose     | Comirnaty (Biontech)     | Comirnaty (Biontech) | 23/9/2021 | 16  | Multiple sclerosis, Hashimoto    | L-thyroxine              |
| C4.586 | 4 | 18 | Female | Negative | Negative | No | Yes    | No | 1st dose     | Comirnaty (Biontech)     |                      | 2/9/2021  | 37  | None                             | None                     |
| C4.587 | 4 | 50 | Male   | Negative | Negative | No | No     | No | 1st dose     | Johnson & Johnson        |                      | 17/6/2021 | 114 | None                             | None                     |
| C4.588 | 4 | 46 | Male   | Negative | Negative | No | No     | No | 2nd dose     | Vaxzevria (Astra-Zeneca) | Comirnaty (Biontech) | 21/7/2021 | 80  | None                             | None                     |
| C4.589 | 4 | 26 | Female | Negative | Negative | No | No     | No | 2nd dose     | Comirnaty (Biontech)     | Comirnaty (Biontech) | N/A       | N/A | None                             | None                     |
| C4.590 | 4 | 41 | Female | Negative | Negative | No | No     | No | Unvaccinated |                          |                      |           |     | None                             | None                     |
| C4.591 | 4 | 21 | Female | Negative | Negative | No | No     | No | 2nd dose     | Comirnaty (Biontech)     | Comirnaty (Biontech) | 14/7/2021 | 87  | None                             | None                     |
| C4.592 | 4 | 29 | Female | Negative | Negative | No | No     | No | 2nd dose     | Covid-19 (Moderna)       | Covid-19 (Moderna)   | 19/7/2021 | 82  | None                             | None                     |
| C4.593 | 4 | 41 | Female | Negative | Negative | No | No     | No | 2nd dose     | Comirnaty (Biontech)     | Comirnaty (Biontech) | 4/8/2021  | 66  | None                             | None                     |
| C4.594 | 4 | 41 | Female | Negative | Negative | No | No     | No | 2nd dose     | Vaxzevria (Astra-Zeneca) | Comirnaty (Biontech) | 21/7/2021 | 80  | None                             | None                     |
| C4.595 | 4 | 28 | Male   | Negative | Negative | No | No     | No | 2nd dose     | Comirnaty (Biontech)     | Comirnaty (Biontech) | 18/7/2021 | 83  | None                             | None                     |
| C4.596 | 4 | 33 | Male   | Negative | Negative | No | Unsure | No | 1st dose     | Johnson & Johnson        |                      | 7/6/2021  | 124 | None                             | None                     |
| C4.597 | 4 | 18 | Female | Negative | Negative | No | No     | No | 2nd dose     | Comirnaty (Biontech)     | Comirnaty (Biontech) | 3/8/2021  | 67  | None                             | None                     |
| C4.598 | 4 | 34 | Male   | Negative | Negative | No | No     | No | 2nd dose     | Covid-19 (Moderna)       | Covid-19 (Moderna)   | 26/4/2021 | 166 | None                             | None                     |
| C4.599 | 4 | 26 | Female | Negative | Negative | No | No     | No | 2nd dose     | Comirnaty (Biontech)     | Comirnaty (Biontech) | 27/5/2021 | 135 | None                             | None                     |
| C4.600 | 4 | 23 | Male   | Negative | Negative | No | No     | No | 2nd dose     | Comirnaty (Biontech)     | Comirnaty (Biontech) | 15/7/2021 | 86  | None                             | None                     |
| C4.601 | 4 | 47 | Male   | Negative | Negative | No | No     | No | 2nd dose     | Comirnaty (Biontech)     | Comirnaty (Biontech) | 26/7/2021 | 75  | None                             | None                     |
| C4.602 | 4 | 21 | Male   | Negative | Negative | No | No     | No | 2nd dose     | Comirnaty (Biontech)     | Comirnaty (Biontech) | 1/7/2021  | 100 | None                             | None                     |
| C4.603 | 4 | 39 | Female | Negative | Negative | No | No     | No | 2nd dose     | Comirnaty (Biontech)     | Comirnaty (Biontech) | 8/7/2021  | 93  | Hypertension                     | Enalapril, escitalopram  |
| C4.604 | 4 | 33 | Female | Negative | Negative | No | No     | No | 2nd dose     | Covid-19 (Moderna)       | Covid-19 (Moderna)   | 2/7/2021  | 99  | None                             | None                     |



|        |   |    |        |          |          |    |     |    |          |                          |                          |           |     |                  |                         |
|--------|---|----|--------|----------|----------|----|-----|----|----------|--------------------------|--------------------------|-----------|-----|------------------|-------------------------|
| C4.605 | 4 | 31 | Female | Negative | Negative | No | No  | No | 2nd dose | Comirnaty (Biontech)     | Comirnaty (Biontech)     | 13/8/2021 | 57  | None             | None                    |
| C4.606 | 4 | 20 | Male   | Negative | Negative | No | No  | No | 2nd dose | Comirnaty (Biontech)     | Comirnaty (Biontech)     | 29/7/2021 | 72  | None             | None                    |
| C4.607 | 4 | 40 | Male   | Negative | Negative | No | No  | No | 2nd dose | Vaxzevria (Astra-Zeneca) | Vaxzevria (Astra-Zeneca) | 7/7/2021  | 94  | None             | None                    |
| C4.608 | 4 | 53 | Male   | Negative | Negative | No | No  | No | 2nd dose | Comirnaty (Biontech)     | Comirnaty (Biontech)     | 18/6/2021 | 113 | None             | None                    |
| C4.609 | 4 | 33 | Female | Negative | Negative | No | No  | No | 2nd dose | Covid-19 (Moderna)       | Covid-19 (Moderna)       | 18/5/2021 | 144 | None             | None                    |
| C4.610 | 4 | 23 | Female | Negative | Negative | No | No  | No | 2nd dose | Comirnaty (Biontech)     | Comirnaty (Biontech)     | 22/7/2021 | 79  | None             | None                    |
| C4.611 | 4 | 34 | Female | Negative | Negative | No | No  | No | 2nd dose | Comirnaty (Biontech)     | Comirnaty (Biontech)     | 10/6/2021 | 121 | None             | None                    |
| C4.612 | 4 | 48 | Female | Negative | Negative | No | No  | No | 2nd dose | Comirnaty (Biontech)     | Comirnaty (Biontech)     | 21/7/2021 | 80  | Hypertension     | Amlodipine, candesartan |
| C4.613 | 4 | 50 | Male   | Negative | Negative | No | No  | No | 2nd dose | Vaxzevria (Astra-Zeneca) | Comirnaty (Biontech)     | 11/8/2021 | 59  | Bronchial asthma | None                    |
| C4.614 | 4 | 22 | Male   | Negative | Negative | No | No  | No | 2nd dose | Vaxzevria (Astra-Zeneca) | Vaxzevria (Astra-Zeneca) | 22/6/2021 | 109 | None             | None                    |
| C4.615 | 4 | 28 | Female | Negative | Negative | No | No  | No | 2nd dose | Covid-19 (Moderna)       | Covid-19 (Moderna)       | 28/7/2021 | 73  | None             | None                    |
| C4.616 | 4 | 21 | Female | Negative | Negative | No | No  | No | 2nd dose | Comirnaty (Biontech)     | Comirnaty (Biontech)     | 31/8/2021 | 39  | None             | None                    |
| C4.617 | 4 | 36 | Female | Negative | Negative | No | No  | No | 2nd dose | Comirnaty (Biontech)     | Comirnaty (Biontech)     | 7/7/2021  | 94  | None             | None                    |
| C4.618 | 4 | 36 | Female | Negative | Negative | No | Yes | No | 1st dose | Comirnaty (Biontech)     |                          | 23/9/2021 | 16  | None             | None                    |
| C4.619 | 4 | 23 | Male   | Negative | Negative | No | No  | No | 2nd dose | Vaxzevria (Astra-Zeneca) | Comirnaty (Biontech)     | 20/7/2021 | 81  | None             | None                    |
| C4.620 | 4 | 23 | Female | Negative | Negative | No | No  | No | 2nd dose | Covid-19 (Moderna)       | Covid-19 (Moderna)       | 23/7/2021 | 78  | None             | None                    |
| C4.621 | 4 | 40 | Female | Negative | Negative | No | No  | No | 2nd dose | Comirnaty (Biontech)     | Comirnaty (Biontech)     | 13/7/2021 | 88  | None             | None                    |
| C4.622 | 4 | 37 | Male   | Negative | Negative | No | No  | No | 1st dose | Johnson & Johnson        |                          | 7/8/2021  | 63  | None             | None                    |
| C4.623 | 4 | 27 | Female | Negative | Negative | No | No  | No | 2nd dose | Covid-19 (Moderna)       | Covid-19 (Moderna)       | 1/7/2021  | 100 | Mental disorder  | Venlafaxine             |
| C4.624 | 4 | 21 | Male   | Negative | Negative | No | No  | No | 2nd dose | Comirnaty (Biontech)     | Comirnaty (Biontech)     | 4/6/2021  | 127 | None             | None                    |

|        |   |    |        |          |          |    |    |    |              |                          |                      |           |     |                                 |                      |
|--------|---|----|--------|----------|----------|----|----|----|--------------|--------------------------|----------------------|-----------|-----|---------------------------------|----------------------|
| C4.625 | 4 | 31 | Female | Negative | Negative | No | No | No | 2nd dose     | Covid-19 (Moderna)       | Covid-19 (Moderna)   | 11/8/2021 | 59  | None                            | None                 |
| C4.626 | 4 | 30 | Male   | Negative | Negative | No | No | No | 2nd dose     | Comirnaty (Biontech)     | Comirnaty (Biontech) | 19/6/2021 | 112 | None                            | None                 |
| C4.627 | 4 | 51 | Female | Negative | Negative | No | No | No | 2nd dose     | Vaxzevria (Astra-Zeneca) | Comirnaty (Biontech) | 13/5/2021 | 149 | None                            | None                 |
| C4.628 | 4 | 30 | Female | Negative | Negative | No | No | No | 2nd dose     | Comirnaty (Biontech)     | Comirnaty (Biontech) | 21/6/2021 | 110 | Hypertension                    | Metoprolol           |
| C4.629 | 4 | 47 | Male   | Negative | Negative | No | No | No | 2nd dose     | Vaxzevria (Astra-Zeneca) | Comirnaty (Biontech) | N/A       | N/A | None                            | None                 |
| C4.630 | 4 | 24 | Female | Negative | Negative | No | No | No | Unvaccinated |                          |                      |           |     | None                            | None                 |
| C4.631 | 4 | 29 | Female | Negative | Negative | No | No | No | 2nd dose     | Comirnaty (Biontech)     | Comirnaty (Biontech) | 14/7/2021 | 87  | None                            | None                 |
| C4.632 | 4 | 20 | Female | Negative | Negative | No | No | No | 2nd dose     | Comirnaty (Biontech)     | Comirnaty (Biontech) | 25/2/2021 | 226 | None                            | None                 |
| C4.633 | 4 | 25 | Male   | Negative | Negative | No | No | No | Unvaccinated |                          |                      |           |     | None                            | None                 |
| C4.634 | 4 | 23 | Female | Negative | Negative | No | No | No | 2nd dose     | Comirnaty (Biontech)     | Comirnaty (Biontech) | 13/8/2021 | 57  | None                            | None                 |
| C4.635 | 4 | 48 | Female | Negative | Negative | No | No | No | 2nd dose     | Comirnaty (Biontech)     | Comirnaty (Biontech) | 20/5/2021 | 142 | None                            | None                 |
| C4.636 | 4 | 48 | Male   | Negative | Negative | No | No | No | 2nd dose     | Comirnaty (Biontech)     | Comirnaty (Biontech) | 24/6/2021 | 107 | None                            | None                 |
| C4.637 | 4 | 27 | Male   | Negative | Negative | No | No | No | 2nd dose     | Vaxzevria (Astra-Zeneca) | Comirnaty (Biontech) | 19/8/2021 | 51  | None                            | None                 |
| C4.638 | 4 | 24 | Female | Negative | Negative | No | No | No | 1st dose     | Johnson & Johnson        |                      | 17/6/2021 | 114 | None                            | None                 |
| C4.639 | 4 | 21 | Male   | Negative | Negative | No | No | No | 2nd dose     | Comirnaty (Biontech)     | Comirnaty (Biontech) | 28/7/2021 | 73  | None                            | None                 |
| C4.640 | 4 | 30 | Female | Negative | Negative | No | No | No | 2nd dose     | Vaxzevria (Astra-Zeneca) | Comirnaty (Biontech) | 16/6/2021 | 115 | Diabetes type 1, hypothyroidism | Insulin, l-thyroxine |
| C4.641 | 4 | 51 | Male   | Negative | Negative | No | No | No | 2nd dose     | Comirnaty (Biontech)     | Comirnaty (Biontech) | 30/6/2021 | 101 | None                            | None                 |
| C4.642 | 4 | 23 | Male   | Negative | Negative | No | No | No | 1st dose     | Johnson & Johnson        |                      | 10/8/2021 | 60  | None                            | None                 |
| C4.643 | 4 | 29 | Male   | Negative | Negative | No | No | No | 2nd dose     | Comirnaty (Biontech)     | Comirnaty (Biontech) | 6/5/2021  | 156 | None                            | None                 |
| C4.644 | 4 | 50 | Male   | Negative | Negative | No | No | No | 2nd dose     | Comirnaty (Biontech)     | Comirnaty (Biontech) | 12/8/2021 | 58  | None                            | None                 |

|        |   |    |        |          |          |    |        |    |              |                          |                          |           |     |                        |                                                          |
|--------|---|----|--------|----------|----------|----|--------|----|--------------|--------------------------|--------------------------|-----------|-----|------------------------|----------------------------------------------------------|
| C4.645 | 4 | 57 | Male   | Negative | Negative | No | No     | No | 2nd dose     | Comirnaty (Biontech)     | Comirnaty (Biontech)     | 23/6/2021 | 108 | Diabetes, hypertension | Pantoprazole, amlodipine, bisoprolol, metformin, insulin |
| C4.646 | 4 | 22 | Male   | Negative | Negative | No | No     | No | 2nd dose     | Comirnaty (Biontech)     | Comirnaty (Biontech)     | 21/6/2021 | 110 | None                   | None                                                     |
| C4.647 | 4 | 28 | Female | Negative | Negative | No | No     | No | 2nd dose     | Comirnaty (Biontech)     | Comirnaty (Biontech)     | N/A       | N/A | Hypothyroidism         | L-thyroxine                                              |
| C4.648 | 4 | 30 | Male   | Negative | Negative | No | No     | No | 2nd dose     | Comirnaty (Biontech)     | Comirnaty (Biontech)     | 15/6/2021 | 116 | None                   | None                                                     |
| C4.649 | 4 | 25 | Female | Negative | Negative | No | No     | No | 2nd dose     | Vaxzevria (Astra-Zeneca) | Comirnaty (Biontech)     | 7/7/2021  | 94  | None                   | None                                                     |
| C4.650 | 4 | 29 | Female | Negative | Negative | No | No     | No | 2nd dose     | Comirnaty (Biontech)     | Comirnaty (Biontech)     | 17/6/2021 | 114 | None                   | None                                                     |
| C4.651 | 4 | 50 | Female | Negative | Negative | No | No     | No | 2nd dose     | Comirnaty (Biontech)     | Comirnaty (Biontech)     | 28/5/2021 | 134 | Hypertension           | Ramipril, amlodipine                                     |
| C4.652 | 4 | 25 | Male   | Negative | Negative | No | No     | No | 2nd dose     | Comirnaty (Biontech)     | Comirnaty (Biontech)     | 4/8/2021  | 66  | None                   | None                                                     |
| C4.653 | 4 | 22 | Male   | Negative | Negative | No | No     | No | 2nd dose     | Comirnaty (Biontech)     | Comirnaty (Biontech)     | 12/8/2021 | 58  | None                   | None                                                     |
| C4.654 | 4 | 44 | Male   | Negative | Negative | No | No     | No | 2nd dose     | Comirnaty (Biontech)     | Comirnaty (Biontech)     | 22/5/2021 | 140 | Hypertension           | Candesartan, chlortalidone, metoprolol                   |
| C4.655 | 4 | 45 | Female | Negative | Negative | No | No     | No | 2nd dose     | Comirnaty (Biontech)     | Comirnaty (Biontech)     | 18/6/2021 | 113 | None                   | None                                                     |
| C4.656 | 4 | 25 | Female | Negative | Negative | No | No     | No | 2nd dose     | Comirnaty (Biontech)     | Comirnaty (Biontech)     | 25/8/2021 | 45  | None                   | None                                                     |
| C4.657 | 4 | 34 | Male   | Negative | Negative | No | No     | No | 2nd dose     | Vaxzevria (Astra-Zeneca) | Vaxzevria (Astra-Zeneca) | 12/7/2021 | 89  | None                   | None                                                     |
| C4.658 | 4 | 29 | Male   | Negative | Negative | No | No     | No | 2nd dose     | Comirnaty (Biontech)     | Comirnaty (Biontech)     | 15/7/2021 | 86  | None                   | None                                                     |
| C4.659 | 4 | 21 | Female | Negative | Negative | No | No     | No | 2nd dose     | Covid-19 (Moderna)       | Covid-19 (Moderna)       | 9/8/2021  | 61  | None                   | None                                                     |
| C4.660 | 4 | 49 | Female | Negative | Negative | No | No     | No | Unvaccinated |                          |                          |           |     | None                   | None                                                     |
| C4.661 | 4 | 50 | Male   | Negative | Negative | No | No     | No | 2nd dose     | Comirnaty (Biontech)     | Comirnaty (Biontech)     | 12/8/2021 | 58  | None                   | None                                                     |
| C4.662 | 4 | 31 | Female | Negative | Negative | No | No     | No | 2nd dose     | Comirnaty (Biontech)     | Comirnaty (Biontech)     | 28/1/2021 | 254 | None                   | None                                                     |
| C4.663 | 4 | 33 | Male   | Negative | Negative | No | Unsure | No | Unvaccinated |                          |                          |           |     | None                   | None                                                     |
| C4.664 | 4 | 46 | Female | Negative | Negative | No | No     | No | 2nd dose     | Comirnaty (Biontech)     | Comirnaty (Biontech)     | N/A       | N/A | None                   | None                                                     |
| C4.665 | 4 | 31 | Male   | Negative | Negative | No | Yes    | No | 1st dose     | Comirnaty (Biontech)     |                          | 2/6/2021  | 129 | None                   | None                                                     |

|        |   |    |        |          |          |    |        |    |              |                          |                          |           |     |                                  |                         |
|--------|---|----|--------|----------|----------|----|--------|----|--------------|--------------------------|--------------------------|-----------|-----|----------------------------------|-------------------------|
| C4.666 | 4 | 25 | Female | Negative | Negative | No | No     | No | 2nd dose     | Comirnaty (Biontech)     | Comirnaty (Biontech)     | 30/7/2021 | 71  | None                             | None                    |
| C4.667 | 4 | 40 | Male   | Negative | Negative | No | No     | No | 1st dose     | Comirnaty (Biontech)     |                          | 22/9/2021 | 17  | None                             | None                    |
| C4.668 | 4 | 31 | Male   | Negative | Negative | No | No     | No | Unvaccinated |                          |                          |           |     | None                             | None                    |
| C4.669 | 4 | 23 | Female | Negative | Negative | No | No     | No | 2nd dose     | Comirnaty (Biontech)     | Comirnaty (Biontech)     | 13/8/2021 | 57  | None                             | None                    |
| C4.670 | 4 | 29 | Female | Negative | Negative | No | No     | No | 2nd dose     | Vaxzevria (Astra-Zeneca) | Comirnaty (Biontech)     | 5/6/2021  | 126 | None                             | None                    |
| C4.671 | 4 | 53 | Male   | Negative | Negative | No | No     | No | 2nd dose     | Comirnaty (Biontech)     | Comirnaty (Biontech)     | 18/6/2021 | 113 | Hypertension                     | Ramipril                |
| C4.672 | 4 | 40 | Male   | Negative | Negative | No | No     | No | 2nd dose     | Comirnaty (Biontech)     | Comirnaty (Biontech)     | 11/6/2021 | 120 | None                             | None                    |
| C4.673 | 4 | 27 | Female | Negative | Negative | No | No     | No | 2nd dose     | Comirnaty (Biontech)     | Comirnaty (Biontech)     | 18/8/2021 | 52  | None                             | None                    |
| C4.674 | 4 | 41 | Female | Negative | Negative | No | Unsure | No | 2nd dose     | Comirnaty (Biontech)     | Comirnaty (Biontech)     | 22/5/2021 | 140 | None                             | None                    |
| C4.675 | 4 | 23 | Male   | Negative | Negative | No | No     | No | 2nd dose     | Vaxzevria (Astra-Zeneca) | Comirnaty (Biontech)     | 22/7/2021 | 79  | None                             | None                    |
| C4.676 | 4 | 53 | Male   | Negative | Negative | No | No     | No | 2nd dose     | Comirnaty (Biontech)     | Comirnaty (Biontech)     | 25/6/2021 | 106 | None                             | None                    |
| C4.677 | 4 | 29 | Male   | Negative | Negative | No | No     | No | 2nd dose     | Comirnaty (Biontech)     | Comirnaty (Biontech)     | 9/8/2021  | 61  | None                             | None                    |
| C4.678 | 4 | 32 | Female | Negative | Negative | No | No     | No | 2nd dose     | Vaxzevria (Astra-Zeneca) | Vaxzevria (Astra-Zeneca) | 12/7/2021 | 89  | Bronchial asthma, hypothyroidism | L-thyroxine, formoterol |
| C4.679 | 4 | 23 | Female | Negative | Negative | No | No     | No | 2nd dose     | Covid-19 (Moderna)       | Covid-19 (Moderna)       | 31/5/2021 | 131 | Allergic asthma                  | Asthma inhaler          |
| C4.680 | 4 | 40 | Male   | Negative | Negative | No | No     | No | 2nd dose     | Comirnaty (Biontech)     | Comirnaty (Biontech)     | 10/9/2021 | 29  | None                             | None                    |
| C4.681 | 4 | 26 | Male   | Negative | Negative | No | No     | No | 2nd dose     | Vaxzevria (Astra-Zeneca) | Covid-19 (Moderna)       | 27/6/2021 | 104 | None                             | None                    |
| C4.682 | 4 | 26 | Male   | Negative | Negative | No | No     | No | 2nd dose     | Comirnaty (Biontech)     | Comirnaty (Biontech)     | 21/7/2021 | 80  | None                             | None                    |
| C4.683 | 4 | 39 | Female | Negative | Negative | No | No     | No | 2nd dose     | Covid-19 (Moderna)       | Covid-19 (Moderna)       | N/A       | N/A | None                             | None                    |
| C4.684 | 4 | 34 | Female | Negative | Negative | No | Unsure | No | Unvaccinated |                          |                          |           |     | None                             | None                    |
| C4.685 | 4 | 40 | Male   | Negative | Negative | No | No     | No | 2nd dose     | Comirnaty (Biontech)     | Comirnaty (Biontech)     | 20/6/2021 | 111 | Diabetes                         | Metformin               |
| C4.686 | 4 | 20 | Male   | Negative | Negative | No | No     | No | 2nd dose     | Comirnaty (Biontech)     | Comirnaty (Biontech)     | 7/9/2021  | 32  | None                             | None                    |

|        |   |    |        |          |          |    |    |    |              |                          |                      |           |     |                                              |              |
|--------|---|----|--------|----------|----------|----|----|----|--------------|--------------------------|----------------------|-----------|-----|----------------------------------------------|--------------|
| C4.687 | 4 | 44 | Female | Negative | Negative | No | No | No | 2nd dose     | Comirnaty (Biontech)     | Comirnaty (Biontech) | 19/5/2021 | 143 | None                                         | None         |
| C4.688 | 4 | 26 | Female | Negative | Negative | No | No | No | Unvaccinated |                          |                      |           |     | None                                         | None         |
| C4.689 | 4 | 33 | Female | Negative | Negative | No | No | No | 2nd dose     | Covid-19 (Moderna)       | Covid-19 (Moderna)   | 28/7/2021 | 73  | None                                         | None         |
| C4.690 | 4 | 20 | Male   | Negative | Negative | No | No | No | 2nd dose     | Comirnaty (Biontech)     | Comirnaty (Biontech) | 13/7/2021 | 88  | Reflux                                       | Pantoprazole |
| C4.691 | 4 | 22 | Male   | Negative | Negative | No | No | No | 2nd dose     | Johnson & Johnson        | Other vaccine        | 26/5/2021 | 136 | None                                         | None         |
| C4.692 | 4 | 36 | Female | Negative | Negative | No | No | No | 1st dose     | Comirnaty (Biontech)     |                      | 22/9/2021 | 17  | None                                         | None         |
| C4.693 | 4 | 53 | Female | Negative | Negative | No | No | No | 2nd dose     | Covid-19 (Moderna)       | Covid-19 (Moderna)   | 5/5/2021  | 157 | Survived Miller fisher syndrome and leucemia | Escitalopram |
| C4.694 | 4 | 39 | Male   | Negative | Negative | No | No | No | 2nd dose     | Comirnaty (Biontech)     | Comirnaty (Biontech) | 4/2/2021  | 247 | None                                         | None         |
| C4.695 | 4 | 31 | Female | Negative | Negative | No | No | No | 2nd dose     | Vaxzevria (Astra-Zeneca) | Comirnaty (Biontech) | 25/5/2021 | 137 | None                                         | None         |
| C4.696 | 4 | 24 | Female | Negative | Negative | No | No | No | 2nd dose     | Comirnaty (Biontech)     | Comirnaty (Biontech) | 20/7/2021 | 81  | None                                         | None         |
| C4.697 | 4 | 19 | Male   | Negative | Negative | No | No | No | 2nd dose     | Comirnaty (Biontech)     | Comirnaty (Biontech) | 26/9/2021 | 13  | None                                         | None         |
| C4.698 | 4 | 31 | Male   | Negative | Negative | No | No | No | 2nd dose     | Comirnaty (Biontech)     | Comirnaty (Biontech) | 8/7/2021  | 93  | None                                         | None         |
| C4.699 | 4 | 30 | Male   | Negative | Negative | No | No | No | 2nd dose     | Vaxzevria (Astra-Zeneca) | Comirnaty (Biontech) | 7/7/2021  | 94  | None                                         | None         |
| C4.700 | 4 | 24 | Female | Negative | Negative | No | No | No | 2nd dose     | Comirnaty (Biontech)     | Comirnaty (Biontech) | 14/7/2021 | 87  | None                                         | None         |
| C4.701 | 4 | 27 | Male   | Negative | Negative | No | No | No | 2nd dose     | Comirnaty (Biontech)     | Comirnaty (Biontech) | 27/7/2021 | 74  | None                                         | None         |
| C4.702 | 4 | 24 | Male   | Negative | Negative | No | No | No | 2nd dose     | Comirnaty (Biontech)     | Comirnaty (Biontech) | 14/7/2021 | 87  | None                                         | None         |
| C4.703 | 4 | 31 | Female | Negative | Negative | No | No | No | 2nd dose     | Comirnaty (Biontech)     | Comirnaty (Biontech) | 7/6/2021  | 124 | None                                         | None         |
| C4.704 | 4 | 29 | Female | Negative | Negative | No | No | No | 2nd dose     | Comirnaty (Biontech)     | Comirnaty (Biontech) | 26/6/2021 | 105 | None                                         | None         |
| C4.705 | 4 | 27 | Female | Negative | Negative | No | No | No | 2nd dose     | Comirnaty (Biontech)     | Comirnaty (Biontech) | 14/7/2021 | 87  | None                                         | None         |
| C4.706 | 4 | 25 | Male   | Negative | Negative | No | No | No | 2nd dose     | Covid-19 (Moderna)       | Covid-19 (Moderna)   | 24/6/2021 | 107 | None                                         | None         |
| C4.707 | 4 | 29 | Male   | Negative | Negative | No | No | No | 2nd dose     | Comirnaty (Biontech)     | Comirnaty (Biontech) | 20/7/2021 | 81  | None                                         | None         |

|        |   |    |        |          |          |    |     |    |              |                          |                          |           |     |                        |                                               |
|--------|---|----|--------|----------|----------|----|-----|----|--------------|--------------------------|--------------------------|-----------|-----|------------------------|-----------------------------------------------|
| C4.708 | 4 | 29 | Male   | Negative | Negative | No | No  | No | 2nd dose     | Vaxzevria (Astra-Zeneca) | Comirnaty (Biontech)     | 5/7/2021  | 96  | None                   | None                                          |
| C4.709 | 4 | 24 | Male   | Negative | Negative | No | No  | No | 2nd dose     | Comirnaty (Biontech)     | Comirnaty (Biontech)     | 23/7/2021 | 78  | None                   | None                                          |
| C4.710 | 4 | 27 | Female | Negative | Negative | No | No  | No | 2nd dose     | Comirnaty (Biontech)     | Comirnaty (Biontech)     | 27/7/2021 | 74  | None                   | None                                          |
| C4.711 | 4 | 25 | Female | Negative | Negative | No | No  | No | 2nd dose     | Vaxzevria (Astra-Zeneca) | Comirnaty (Biontech)     | 16/7/2021 | 85  | None                   | None                                          |
| C4.712 | 4 | 27 | Female | Negative | Negative | No | No  | No | 2nd dose     | Comirnaty (Biontech)     | Comirnaty (Biontech)     | 8/6/2021  | 123 | None                   | None                                          |
| C4.713 | 4 | 31 | Male   | Negative | Negative | No | No  | No | 2nd dose     | Vaxzevria (Astra-Zeneca) | Comirnaty (Biontech)     | 29/7/2021 | 72  | None                   | None                                          |
| C4.714 | 4 | 38 | Male   | Negative | Negative | No | No  | No | 2nd dose     | Covid-19 (Moderna)       | Covid-19 (Moderna)       | 25/7/2021 | 76  | None                   | None                                          |
| C4.715 | 4 | 30 | Male   | Negative | Negative | No | No  | No | 2nd dose     | Comirnaty (Biontech)     | Comirnaty (Biontech)     | 21/6/2021 | 110 | None                   | None                                          |
| C4.716 | 4 | 57 | Male   | Negative | Negative | No | No  | No | 2nd dose     | Comirnaty (Biontech)     | Comirnaty (Biontech)     | 28/4/2021 | 164 | Coronary heart disease | Bisoprolol, acetylsalicylic acid, simvastatin |
| C4.717 | 4 | 31 | Female | Negative | Negative | No | No  | No | 2nd dose     | Covid-19 (Moderna)       | Covid-19 (Moderna)       | 13/8/2021 | 57  | None                   | None                                          |
| C4.718 | 4 | 27 | Female | Negative | Negative | No | No  | No | 2nd dose     | Vaxzevria (Astra-Zeneca) | Comirnaty (Biontech)     | 18/6/2021 | 113 | Hashimoto              | L-thyroxine                                   |
| C4.719 | 4 | 18 | Female | Negative | Negative | No | No  | No | 2nd dose     | Comirnaty (Biontech)     | Comirnaty (Biontech)     | 17/6/2021 | 114 | None                   | None                                          |
| C4.720 | 4 | 23 | Male   | Negative | Negative | No | No  | No | 2nd dose     | Comirnaty (Biontech)     | Comirnaty (Biontech)     | 13/8/2021 | 57  | None                   | None                                          |
| C4.721 | 4 | 29 | Male   | Negative | Negative | No | No  | No | 2nd dose     | Comirnaty (Biontech)     | Vaxzevria (Astra-Zeneca) | N/A       | N/A | None                   | None                                          |
| C4.722 | 4 | 29 | Female | Negative | Negative | No | Yes | No | 2nd dose     | Comirnaty (Biontech)     | Comirnaty (Biontech)     | 15/9/2021 | 24  | None                   | None                                          |
| C4.723 | 4 | 43 | Female | Negative | Negative | No | No  | No | Unvaccinated |                          |                          |           |     | None                   | None                                          |
| C4.724 | 4 | 33 | Female | Negative | Negative | No | No  | No | 2nd dose     | Comirnaty (Biontech)     | Comirnaty (Biontech)     | 20/5/2021 | 142 | None                   | None                                          |
| C4.725 | 4 | 42 | Female | Negative | Negative | No | No  | No | 2nd dose     | Vaxzevria (Astra-Zeneca) | Vaxzevria (Astra-Zeneca) | 10/5/2021 | 152 | None                   | None                                          |
| C4.726 | 4 | 20 | Male   | Negative | Negative | No | No  | No | 2nd dose     | Comirnaty (Biontech)     | Comirnaty (Biontech)     | 17/6/2021 | 114 | None                   | None                                          |

|        |   |    |        |          |          |    |    |    |              |                          |                      |           |     |                    |                                                               |
|--------|---|----|--------|----------|----------|----|----|----|--------------|--------------------------|----------------------|-----------|-----|--------------------|---------------------------------------------------------------|
| C4.727 | 4 | 42 | Female | Negative | Negative | No | No | No | 2nd dose     | Comirnaty (Biontech)     | Comirnaty (Biontech) | 21/6/2021 | 110 | None               | None                                                          |
| C4.728 | 4 | 23 | Female | Negative | Negative | No | No | No | Unvaccinated |                          |                      |           |     | None               | None                                                          |
| C4.729 | 4 | 28 | Male   | Negative | Negative | No | No | No | 2nd dose     | Comirnaty (Biontech)     | Comirnaty (Biontech) | 22/7/2021 | 79  | None               | None                                                          |
| C4.730 | 4 | 25 | Male   | Negative | Negative | No | No | No | 2nd dose     | Comirnaty (Biontech)     | Comirnaty (Biontech) | 8/6/2021  | 123 | None               | None                                                          |
| C4.731 | 4 | 47 | Female | Negative | Negative | No | No | No | 2nd dose     | Covid-19 (Moderna)       | Covid-19 (Moderna)   | 10/5/2021 | 152 | None               | None                                                          |
| C4.732 | 4 | 52 | Male   | Negative | Negative | No | No | No | 2nd dose     | Vaxzevria (Astra-Zeneca) | Comirnaty (Biontech) | 12/7/2021 | 89  | None               | None                                                          |
| C4.733 | 4 | 43 | Female | Negative | Negative | No | No | No | 2nd dose     | Comirnaty (Biontech)     | Comirnaty (Biontech) | 21/6/2021 | 110 | None               | None                                                          |
| C4.734 | 4 | 36 | Female | Negative | Negative | No | No | No | 2nd dose     | Comirnaty (Biontech)     | Comirnaty (Biontech) | 26/7/2021 | 75  | None               | None                                                          |
| C4.735 | 4 | 24 | Female | Negative | Negative | No | No | No | 2nd dose     | Covid-19 (Moderna)       | Covid-19 (Moderna)   | N/A       | N/A | None               | None                                                          |
| C4.736 | 4 | 24 | Male   | Negative | Negative | No | No | No | 2nd dose     | Comirnaty (Biontech)     | Comirnaty (Biontech) | 26/6/2021 | 105 | None               | None                                                          |
| C4.737 | 4 | 24 | Female | Negative | Negative | No | No | No | 2nd dose     | Comirnaty (Biontech)     | Comirnaty (Biontech) | 19/7/2021 | 82  | None               | None                                                          |
| C4.738 | 4 | 31 | Female | Negative | Negative | No | No | No | 2nd dose     | Comirnaty (Biontech)     | Comirnaty (Biontech) | 22/7/2021 | 79  | None               | None                                                          |
| C4.739 | 4 | 37 | Male   | Negative | Negative | No | No | No | Unvaccinated |                          |                      |           |     | None               | None                                                          |
| C4.740 | 4 | 27 | Female | Negative | Negative | No | No | No | 2nd dose     | Comirnaty (Biontech)     | Comirnaty (Biontech) | 1/10/2021 | 8   | None               | None                                                          |
| C4.741 | 4 | 25 | Male   | Negative | Negative | No | No | No | 2nd dose     | Comirnaty (Biontech)     | Comirnaty (Biontech) | 22/6/2021 | 109 | None               | None                                                          |
| C4.742 | 4 | 31 | Female | Negative | Negative | No | No | No | 2nd dose     | Comirnaty (Biontech)     | Comirnaty (Biontech) | 21/5/2021 | 141 | Sjögren's-syndrome | Prednisolone, azathioprin, hydroxychloroquin, cholecalciferol |
| C4.743 | 4 | 40 | Male   | Negative | Negative | No | No | No | 2nd dose     | Comirnaty (Biontech)     | Comirnaty (Biontech) | 29/6/2021 | 102 | None               | None                                                          |
| C4.744 | 4 | 19 | Female | Negative | Negative | No | No | No | 2nd dose     | Comirnaty (Biontech)     | Comirnaty (Biontech) | 6/5/2021  | 156 | None               | None                                                          |
| C4.745 | 4 | 32 | Female | Negative | Negative | No | No | No | 2nd dose     | Comirnaty (Biontech)     | Comirnaty (Biontech) | 21/7/2021 | 80  | None               | None                                                          |
| C4.746 | 4 | 25 | Female | Negative | Negative | No | No | No | 2nd dose     | Vaxzevria (Astra-Zeneca) | Comirnaty (Biontech) | 18/6/2021 | 113 | None               | None                                                          |

|        |   |    |        |          |          |    |        |    |              |                          |                      |           |     |                                                                                        |                           |
|--------|---|----|--------|----------|----------|----|--------|----|--------------|--------------------------|----------------------|-----------|-----|----------------------------------------------------------------------------------------|---------------------------|
| C4.747 | 4 | 23 | Male   | Negative | Negative | No | Yes    | No | 2nd dose     | Covid-19 (Moderna)       | Covid-19 (Moderna)   | 9/8/2021  | 61  | Hypertension, atypic migraine headache since corona infection, autoimmune pancreatitis | Metoprolol                |
| C4.748 | 4 | 37 | Female | Negative | Negative | No | No     | No | 2nd dose     | Covid-19 (Moderna)       | Covid-19 (Moderna)   | 1/5/2021  | 161 | None                                                                                   | None                      |
| C4.749 | 4 | 48 | Male   | Negative | Negative | No | No     | No | Unvaccinated |                          |                      |           |     | Hypertension                                                                           | Candesartan, atorvastatin |
| C4.750 | 4 | 34 | Female | Negative | Negative | No | No     | No | 2nd dose     | Comirnaty (Biontech)     | Comirnaty (Biontech) | 13/7/2021 | 88  | None                                                                                   | None                      |
| C4.751 | 4 | 25 | Male   | Negative | Negative | No | No     | No | 2nd dose     | Comirnaty (Biontech)     | Comirnaty (Biontech) | 7/6/2021  | 124 | None                                                                                   | None                      |
| C4.752 | 4 | 34 | Female | Negative | Negative | No | No     | No | 2nd dose     | Comirnaty (Biontech)     | Comirnaty (Biontech) | 9/7/2021  | 92  | None                                                                                   | None                      |
| C4.753 | 4 | 24 | Female | Negative | Negative | No | No     | No | 2nd dose     | Comirnaty (Biontech)     | Comirnaty (Biontech) | N/A       | N/A | None                                                                                   | None                      |
| C4.754 | 4 | 36 | Male   | Negative | Negative | No | No     | No | 2nd dose     | Comirnaty (Biontech)     | Comirnaty (Biontech) | 5/2/2021  | 246 | None                                                                                   | None                      |
| C4.755 | 4 | 44 | Female | Negative | Negative | No | No     | No | 2nd dose     | Comirnaty (Biontech)     | Comirnaty (Biontech) | 29/4/2021 | 163 | Hypertension                                                                           | Bisoprolol                |
| C4.756 | 4 | 43 | Male   | Negative | Negative | No | Unsure | No | 2nd dose     | Comirnaty (Biontech)     | Comirnaty (Biontech) | 27/7/2021 | 74  | None                                                                                   | None                      |
| C4.757 | 4 | 24 | Female | Negative | Negative | No | No     | No | 2nd dose     | Vaxzevria (Astra-Zeneca) | Comirnaty (Biontech) | 2/6/2021  | 129 | None                                                                                   | None                      |
| C4.758 | 4 | 46 | Female | Negative | Negative | No | No     | No | 2nd dose     | Comirnaty (Biontech)     | Comirnaty (Biontech) | 28/7/2021 | 73  | None                                                                                   | None                      |
| C4.759 | 4 | 23 | Female | Negative | Negative | No | No     | No | 2nd dose     | Comirnaty (Biontech)     | Comirnaty (Biontech) | 7/7/2021  | 94  | None                                                                                   | None                      |
| C4.760 | 4 | 26 | Female | Negative | Negative | No | No     | No | 2nd dose     | Comirnaty (Biontech)     | Comirnaty (Biontech) | 16/6/2021 | 115 | None                                                                                   | None                      |
| C4.761 | 4 | 30 | Male   | Negative | Negative | No | No     | No | 2nd dose     | Comirnaty (Biontech)     | Comirnaty (Biontech) | 22/5/2021 | 140 | None                                                                                   | None                      |
| C4.762 | 4 | 39 | Male   | Negative | Negative | No | No     | No | Unvaccinated |                          |                      |           |     | None                                                                                   | None                      |
| C4.763 | 4 | 25 | Female | Negative | Negative | No | No     | No | 1st dose     | Johnson & Johnson        |                      | 2/6/2021  | 129 | None                                                                                   | None                      |
| C4.764 | 4 | 32 | Male   | Negative | Negative | No | No     | No | 2nd dose     | Comirnaty (Biontech)     | Comirnaty (Biontech) | 17/8/2021 | 53  | None                                                                                   | None                      |
| C4.765 | 4 | 30 | Female | Negative | Negative | No | No     | No | 2nd dose     | Covid-19 (Moderna)       | Covid-19 (Moderna)   | 1/5/2021  | 161 | None                                                                                   | None                      |
| C4.766 | 4 | 31 | Male   | Negative | Negative | No | No     | No | 2nd dose     | Comirnaty (Biontech)     | Comirnaty (Biontech) | N/A       | N/A | None                                                                                   | None                      |



|        |   |    |        |          |          |    |        |    |              |                          |                          |           |     |      |      |
|--------|---|----|--------|----------|----------|----|--------|----|--------------|--------------------------|--------------------------|-----------|-----|------|------|
| C4.767 | 4 | 25 | Male   | Negative | Negative | No | No     | No | 2nd dose     | Comirnaty (Biontech)     | Comirnaty (Biontech)     | 13/7/2021 | 88  | None | None |
| C4.768 | 4 | 43 | Female | Negative | Negative | No | No     | No | 2nd dose     | Comirnaty (Biontech)     | Comirnaty (Biontech)     | 10/6/2021 | 121 | None | None |
| C4.769 | 4 | 19 | Female | Negative | Negative | No | No     | No | 2nd dose     | Comirnaty (Biontech)     | Comirnaty (Biontech)     | 9/9/2021  | 30  | None | None |
| C4.770 | 4 | 31 | Male   | Negative | Negative | No | No     | No | 2nd dose     | Comirnaty (Biontech)     | Comirnaty (Biontech)     | 2/6/2021  | 129 | None | None |
| C4.771 | 4 | 28 | Male   | Negative | Negative | No | No     | No | 2nd dose     | Comirnaty (Biontech)     | Comirnaty (Biontech)     | N/A       | N/A | None | None |
| C4.772 | 4 | 22 | Female | Negative | Negative | No | No     | No | 2nd dose     | Comirnaty (Biontech)     | Comirnaty (Biontech)     | 8/6/2021  | 123 | None | None |
| C4.773 | 4 | 38 | Male   | Negative | Negative | No | No     | No | Unvaccinated |                          |                          |           |     | None | None |
| C4.774 | 4 | 52 | Male   | Negative | Negative | No | No     | No | 2nd dose     | Vaxzevria (Astra-Zeneca) | Comirnaty (Biontech)     | 14/7/2021 | 87  | None | None |
| C4.775 | 4 | 34 | Male   | Negative | Negative | No | No     | No | 2nd dose     | Vaxzevria (Astra-Zeneca) | Vaxzevria (Astra-Zeneca) | 23/6/2021 | 108 | None | None |
| C4.776 | 4 | 26 | Female | Negative | Negative | No | Unsure | No | 2nd dose     | Comirnaty (Biontech)     | Comirnaty (Biontech)     | N/A       | N/A | None | None |
| C4.777 | 4 | 21 | Female | Negative | Negative | No | No     | No | 2nd dose     | Comirnaty (Biontech)     | Comirnaty (Biontech)     | 17/6/2021 | 114 | None | None |
| C4.778 | 4 | 29 | Female | Negative | Negative | No | No     | No | 2nd dose     | Vaxzevria (Astra-Zeneca) | Comirnaty (Biontech)     | 19/6/2021 | 112 | None | None |
| C4.779 | 4 | 37 | Male   | Negative | Negative | No | No     | No | 2nd dose     | Comirnaty (Biontech)     | Comirnaty (Biontech)     | 4/8/2021  | 66  | None | None |
| C4.780 | 4 | 38 | Female | Negative | Negative | No | No     | No | 2nd dose     | Comirnaty (Biontech)     | Comirnaty (Biontech)     | N/A       | N/A | None | None |
| C4.781 | 4 | 30 | Female | Negative | Negative | No | No     | No | 2nd dose     | Comirnaty (Biontech)     | Comirnaty (Biontech)     | 14/6/2021 | 117 | None | None |
| C4.782 | 4 | 24 | Female | Negative | Negative | No | No     | No | 2nd dose     | Comirnaty (Biontech)     | Comirnaty (Biontech)     | 20/5/2021 | 142 | None | None |
| C4.783 | 4 | 42 | Female | Negative | Negative | No | No     | No | 2nd dose     | Comirnaty (Biontech)     | Comirnaty (Biontech)     | 21/6/2021 | 110 | None | None |
| C4.784 | 4 | 23 | Female | Negative | Negative | No | No     | No | 2nd dose     | Covid-19 (Moderna)       | Covid-19 (Moderna)       | 10/7/2021 | 91  | None | None |
| C4.785 | 4 | 26 | Male   | Negative | Negative | No | No     | No | 1st dose     | Johnson & Johnson        |                          | 9/6/2021  | 122 | None | None |
| C4.786 | 4 | 20 | Male   | Negative | Negative | No | No     | No | 2nd dose     | Covid-19 (Moderna)       | Covid-19 (Moderna)       | 25/7/2021 | 76  | None | None |
| C4.787 | 4 | 39 | Male   | Negative | Negative | No | No     | No | 2nd dose     | Covid-19 (Moderna)       | Covid-19 (Moderna)       | 20/5/2021 | 142 | None | None |

|        |   |    |        |          |          |    |        |    |              |                          |                      |           |     |                      |                                                             |
|--------|---|----|--------|----------|----------|----|--------|----|--------------|--------------------------|----------------------|-----------|-----|----------------------|-------------------------------------------------------------|
| C4.788 | 4 | 43 | Male   | Negative | Negative | No | No     | No | 1st dose     | Johnson & Johnson        |                      | N/A       | N/A | None                 | None                                                        |
| C4.789 | 4 | 19 | Male   | Negative | Negative | No | No     | No | 1st dose     | Johnson & Johnson        |                      | 13/9/2021 | 26  | None                 | None                                                        |
| C4.790 | 4 | 48 | Male   | Negative | Negative | No | No     | No | 2nd dose     | Comirnaty (Biontech)     | Comirnaty (Biontech) | 15/8/2021 | 55  | None                 | None                                                        |
| C4.791 | 4 | 20 | Female | Negative | Negative | No | No     | No | 2nd dose     | Comirnaty (Biontech)     | Comirnaty (Biontech) | 10/6/2021 | 121 | None                 | None                                                        |
| C4.792 | 4 | 39 | Female | Negative | Negative | No | No     | No | 2nd dose     | Vaxzevria (Astra-Zeneca) | Comirnaty (Biontech) | 18/6/2021 | 113 | None                 | None                                                        |
| C4.793 | 4 | 24 | Female | Negative | Negative | No | No     | No | 2nd dose     | Comirnaty (Biontech)     | Comirnaty (Biontech) | 16/6/2021 | 115 | None                 | None                                                        |
| C4.794 | 4 | 27 | Male   | Negative | Negative | No | Unsure | No | 2nd dose     | Covid-19 (Moderna)       | Covid-19 (Moderna)   | 21/6/2021 | 110 | None                 | None                                                        |
| C4.795 | 4 | 28 | Female | Negative | Negative | No | No     | No | 2nd dose     | Comirnaty (Biontech)     | Comirnaty (Biontech) | N/A       | N/A | None                 | None                                                        |
| C4.796 | 4 | 20 | Male   | Negative | Negative | No | No     | No | Unvaccinated |                          |                      |           |     | None                 | None                                                        |
| C4.797 | 4 | 32 | Female | Negative | Negative | No | No     | No | 1st dose     | Comirnaty (Biontech)     |                      | 22/9/2021 | 17  | None                 | None                                                        |
| C4.798 | 4 | 45 | Male   | Negative | Negative | No | No     | No | 2nd dose     | Comirnaty (Biontech)     | Comirnaty (Biontech) | 3/6/2021  | 128 | Hypertension, asthma | Amlodipine, ramipril, moxonidine, formoterol+beclomethasone |
| C4.799 | 4 | 48 | Male   | Negative | Negative | No | No     | No | 2nd dose     | Covid-19 (Moderna)       | Covid-19 (Moderna)   | 9/8/2021  | 61  | None                 | None                                                        |
| C4.800 | 4 | 46 | Female | Negative | Negative | No | No     | No | 1st dose     | Johnson & Johnson        |                      | 9/6/2021  | 122 | None                 | None                                                        |
| C4.801 | 4 | 36 | Female | Negative | Negative | No | No     | No | Unvaccinated |                          |                      |           |     | None                 | None                                                        |
| C4.802 | 4 | 22 | Male   | Negative | Negative | No | No     | No | 2nd dose     | Covid-19 (Moderna)       | Covid-19 (Moderna)   | 16/9/2021 | 23  | None                 | None                                                        |
| C4.803 | 4 | 27 | Female | Negative | Negative | No | No     | No | 2nd dose     | Covid-19 (Moderna)       | Covid-19 (Moderna)   | 25/7/2021 | 76  | None                 | None                                                        |
| C4.804 | 4 | 22 | Female | Negative | Negative | No | No     | No | 2nd dose     | Covid-19 (Moderna)       | Covid-19 (Moderna)   | 22/7/2021 | 79  | None                 | None                                                        |
| C4.805 | 4 | 37 | Female | Negative | Negative | No | No     | No | 2nd dose     | Comirnaty (Biontech)     | Comirnaty (Biontech) | 15/7/2021 | 86  | None                 | None                                                        |
| C4.806 | 4 | 19 | Female | Negative | Negative | No | No     | No | 2nd dose     | Vaxzevria (Astra-Zeneca) | Comirnaty (Biontech) | 11/5/2021 | 151 | None                 | None                                                        |
| C4.807 | 4 | 30 | Female | Negative | Negative | No | No     | No | Unvaccinated |                          |                      |           |     | None                 | None                                                        |
| C4.808 | 4 | 51 | Female | Negative | Negative | No | No     | No | 2nd dose     | Comirnaty (Biontech)     | Comirnaty (Biontech) | 23/6/2021 | 108 | Hypertension         | Bisoprolol                                                  |

|        |   |    |        |          |          |    |    |    |              |                          |                      |           |     |                           |                         |
|--------|---|----|--------|----------|----------|----|----|----|--------------|--------------------------|----------------------|-----------|-----|---------------------------|-------------------------|
| C4.809 | 4 | 30 | Female | Negative | Negative | No | No | No | 2nd dose     | Covid-19 (Moderna)       | Covid-19 (Moderna)   | 31/7/2021 | 70  | None                      | None                    |
| C4.810 | 4 | 38 | Male   | Negative | Negative | No | No | No | Unvaccinated |                          |                      |           |     | None                      | None                    |
| C4.811 | 4 | 44 | Male   | Negative | Negative | No | No | No | 1st dose     | Johnson & Johnson        |                      | 28/5/2021 | 134 | None                      | None                    |
| C4.812 | 4 | 22 | Male   | Negative | Negative | No | No | No | 2nd dose     | Covid-19 (Moderna)       | Covid-19 (Moderna)   | 29/6/2021 | 102 | None                      | None                    |
| C4.813 | 4 | 21 | Male   | Negative | Negative | No | No | No | 2nd dose     | Comirnaty (Biontech)     | Comirnaty (Biontech) | 16/9/2021 | 23  | None                      | None                    |
| C4.814 | 4 | 20 | Female | Negative | Negative | No | No | No | Unvaccinated |                          |                      |           |     | None                      | None                    |
| C4.815 | 4 | 44 | Female | Negative | Negative | No | No | No | 2nd dose     | Vaxzevria (Astra-Zeneca) | Comirnaty (Biontech) | N/A       | N/A | None                      | None                    |
| C4.816 | 4 | 25 | Male   | Negative | Negative | No | No | No | 2nd dose     | Comirnaty (Biontech)     | Comirnaty (Biontech) | 26/6/2021 | 105 | None                      | None                    |
| C4.817 | 4 | 23 | Male   | Negative | Negative | No | No | No | 1st dose     | Johnson & Johnson        |                      | 10/6/2021 | 121 | None                      | None                    |
| C4.818 | 4 | 33 | Male   | Negative | Negative | No | No | No | 1st dose     | Johnson & Johnson        |                      | 5/6/2021  | 126 | None                      | None                    |
| C4.819 | 4 | 37 | Female | Negative | Negative | No | No | No | 1st dose     | Johnson & Johnson        |                      | 5/5/2021  | 157 | None                      | None                    |
| C4.820 | 4 | 37 | Female | Negative | Negative | No | No | No | 2nd dose     | Vaxzevria (Astra-Zeneca) | Comirnaty (Biontech) | 15/6/2021 | 116 | None                      | None                    |
| C4.821 | 4 | 39 | Female | Negative | Negative | No | No | No | 1st dose     | Johnson & Johnson        |                      | 25/5/2021 | 137 | None                      | None                    |
| C4.822 | 4 | 28 | Male   | Negative | Negative | No | No | No | 2nd dose     | Covid-19 (Moderna)       | Covid-19 (Moderna)   | 2/6/2021  | 129 | None                      | None                    |
| C4.823 | 4 | 31 | Male   | Negative | Negative | No | No | No | 2nd dose     | Vaxzevria (Astra-Zeneca) | Comirnaty (Biontech) | 18/6/2021 | 113 | Hypertension, sleep apnea | Candesartan, amlodipine |
| C4.824 | 4 | 21 | Female | Negative | Negative | No | No | No | 2nd dose     | Comirnaty (Biontech)     | Comirnaty (Biontech) | 18/6/2021 | 113 | None                      | None                    |
| C4.825 | 4 | 44 | Male   | Negative | Negative | No | No | No | 2nd dose     | Comirnaty (Biontech)     | Comirnaty (Biontech) | 23/6/2021 | 108 | Hypercholesterolemia      | Atorvastatin            |
| C4.826 | 4 | 42 | Male   | Negative | Negative | No | No | No | 2nd dose     | Comirnaty (Biontech)     | Comirnaty (Biontech) | 16/8/2021 | 54  | None                      | None                    |
| C4.827 | 4 | 54 | Female | Negative | Negative | No | No | No | 2nd dose     | Comirnaty (Biontech)     | Comirnaty (Biontech) | 10/6/2021 | 121 | None                      | None                    |
| C4.828 | 4 | 29 | Male   | Negative | Negative | No | No | No | 2nd dose     | Comirnaty (Biontech)     | Comirnaty (Biontech) | 20/6/2021 | 111 | None                      | None                    |
| C4.829 | 4 | 23 | Female | Negative | Negative | No | No | No | 2nd dose     | Comirnaty (Biontech)     | Comirnaty (Biontech) | 4/8/2021  | 66  | None                      | None                    |
| C4.830 | 4 | 23 | Female | Negative | Negative | No | No | No | 2nd dose     | Comirnaty (Biontech)     | Comirnaty (Biontech) | 3/8/2021  | 67  | None                      | None                    |

|        |   |    |        |          |          |    |    |    |              |                          |                      |           |     |                 |                         |
|--------|---|----|--------|----------|----------|----|----|----|--------------|--------------------------|----------------------|-----------|-----|-----------------|-------------------------|
| C4.831 | 4 | 24 | Male   | Negative | Negative | No | No | No | 2nd dose     | Comirnaty (Biontech)     | Comirnaty (Biontech) | 22/6/2021 | 109 | None            | None                    |
| C4.832 | 4 | 26 | Female | Negative | Negative | No | No | No | 2nd dose     | Vaxzevria (Astra-Zeneca) | Comirnaty (Biontech) | 12/7/2021 | 89  | None            | None                    |
| C4.833 | 4 | 29 | Male   | Negative | Negative | No | No | No | 2nd dose     | Vaxzevria (Astra-Zeneca) | Comirnaty (Biontech) | 5/8/2021  | 65  | None            | None                    |
| C4.834 | 4 | 21 | Female | Negative | Negative | No | No | No | 2nd dose     | Vaxzevria (Astra-Zeneca) | Comirnaty (Biontech) | 22/6/2021 | 109 | None            | None                    |
| C4.835 | 4 | 29 | Female | Negative | Negative | No | No | No | 2nd dose     | Covid-19 (Moderna)       | Covid-19 (Moderna)   | 7/7/2021  | 94  | None            | None                    |
| C4.836 | 4 | 33 | Male   | Negative | Negative | No | No | No | Unvaccinated |                          |                      |           |     | Allergy         | Cetirizine              |
| C4.837 | 4 | 32 | Female | Negative | Negative | No | No | No | 2nd dose     | Comirnaty (Biontech)     | Comirnaty (Biontech) | 20/5/2021 | 142 | Crohn's disease | Infliximab              |
| C4.838 | 4 | 36 | Male   | Negative | Negative | No | No | No | 1st dose     | Johnson & Johnson        |                      | 5/6/2021  | 126 | None            | None                    |
| C4.839 | 4 | 39 | Female | Negative | Negative | No | No | No | Unvaccinated |                          |                      |           |     | None            | None                    |
| C4.840 | 4 | 18 | Female | Negative | Negative | No | No | No | 2nd dose     | Comirnaty (Biontech)     | Comirnaty (Biontech) | 27/7/2021 | 74  | None            | None                    |
| C4.841 | 4 | 54 | Female | Negative | Negative | No | No | No | 2nd dose     | Comirnaty (Biontech)     | Comirnaty (Biontech) | 12/6/2021 | 119 | None            | None                    |
| C4.842 | 4 | 27 | Female | Negative | Negative | No | No | No | 2nd dose     | Covid-19 (Moderna)       | Covid-19 (Moderna)   | 2/7/2021  | 99  | None            | None                    |
| C4.843 | 4 | 52 | Male   | Negative | Negative | No | No | No | 2nd dose     | Vaxzevria (Astra-Zeneca) | Comirnaty (Biontech) | 21/7/2021 | 80  | None            | None                    |
| C4.844 | 4 | 33 | Female | Negative | Negative | No | No | No | 2nd dose     | Comirnaty (Biontech)     | Comirnaty (Biontech) | 10/9/2021 | 29  | None            | None                    |
| C4.845 | 4 | 50 | Female | Negative | Negative | No | No | No | 2nd dose     | Covid-19 (Moderna)       | Covid-19 (Moderna)   | 21/7/2021 | 80  | None            | None                    |
| C4.846 | 4 | 47 | Female | Negative | Negative | No | No | No | 2nd dose     | Comirnaty (Biontech)     | Comirnaty (Biontech) | 6/5/2021  | 156 | Hypertension    | L-thyroxine, amlodipine |
| C4.847 | 4 | 41 | Female | Negative | Negative | No | No | No | 2nd dose     | Comirnaty (Biontech)     | Comirnaty (Biontech) | 21/5/2021 | 141 | None            | None                    |
| C4.848 | 4 | 30 | Female | Negative | Negative | No | No | No | 2nd dose     | Comirnaty (Biontech)     | Comirnaty (Biontech) | 14/6/2021 | 117 | None            | None                    |
| C4.849 | 4 | 56 | Female | Negative | Negative | No | No | No | 2nd dose     | Comirnaty (Biontech)     | Comirnaty (Biontech) | 22/5/2021 | 140 | None            | None                    |
| C4.850 | 4 | 24 | Female | Negative | Negative | No | No | No | 2nd dose     | Comirnaty (Biontech)     | Comirnaty (Biontech) | 6/7/2021  | 95  | None            | None                    |
| C4.851 | 4 | 30 | Female | Negative | Negative | No | No | No | Unvaccinated |                          |                      |           |     | None            | None                    |

|        |   |    |        |          |          |    |        |    |              |                          |                      |           |     |                        |                                             |
|--------|---|----|--------|----------|----------|----|--------|----|--------------|--------------------------|----------------------|-----------|-----|------------------------|---------------------------------------------|
| C4.852 | 4 | 42 | Male   | Negative | Negative | No | Unsure | No | 2nd dose     | Comirnaty (Biontech)     | Comirnaty (Biontech) | 16/6/2021 | 115 | None                   | None                                        |
| C4.853 | 4 | 30 | Female | Negative | Negative | No | No     | No | Unvaccinated |                          |                      |           |     | None                   | None                                        |
| C4.854 | 4 | 26 | Female | Negative | Negative | No | No     | No | 2nd dose     | Comirnaty (Biontech)     | Comirnaty (Biontech) | 9/7/2021  | 92  | None                   | None                                        |
| C4.855 | 4 | 23 | Male   | Negative | Negative | No | No     | No | 2nd dose     | Comirnaty (Biontech)     | Comirnaty (Biontech) | 19/6/2021 | 112 | None                   | None                                        |
| C4.856 | 4 | 38 | Female | Negative | Negative | No | No     | No | 2nd dose     | Vaxzevria (Astra-Zeneca) | Comirnaty (Biontech) | 4/5/2021  | 158 | None                   | None                                        |
| C4.857 | 4 | 53 | Male   | Negative | Negative | No | No     | No | 1st dose     | Johnson & Johnson        |                      | 27/5/2021 | 135 | Hypertension, diabetes | Telmisartan, hydrochlorothiazid, amlodipine |
| C4.858 | 4 | 52 | Female | Negative | Negative | No | No     | No | 2nd dose     | Comirnaty (Biontech)     | Comirnaty (Biontech) | 9/6/2021  | 122 | None                   | None                                        |
| C4.859 | 4 | 53 | Male   | Negative | Negative | No | No     | No | 2nd dose     | Covid-19 (Moderna)       | Covid-19 (Moderna)   | 28/7/2021 | 73  | None                   | None                                        |
| C4.860 | 4 | 42 | Female | Negative | Negative | No | No     | No | 2nd dose     | Comirnaty (Biontech)     | Comirnaty (Biontech) | 17/8/2021 | 53  | None                   | None                                        |
| C4.861 | 4 | 23 | Male   | Negative | Negative | No | No     | No | 2nd dose     | Comirnaty (Biontech)     | Comirnaty (Biontech) | 12/8/2021 | 58  | None                   | None                                        |
| C4.862 | 4 | 37 | Female | Negative | Negative | No | No     | No | 2nd dose     | Vaxzevria (Astra-Zeneca) | Comirnaty (Biontech) | 9/5/2021  | 153 | None                   | None                                        |
| C4.863 | 4 | 25 | Female | Negative | Negative | No | No     | No | 2nd dose     | Comirnaty (Biontech)     | Comirnaty (Biontech) | 19/6/2021 | 112 | None                   | None                                        |
| C4.864 | 4 | 27 | Male   | Negative | Negative | No | No     | No | 2nd dose     | Comirnaty (Biontech)     | Comirnaty (Biontech) | 16/8/2021 | 54  | None                   | None                                        |
| C4.865 | 4 | 25 | Male   | Negative | Negative | No | No     | No | 2nd dose     | Comirnaty (Biontech)     | Comirnaty (Biontech) | 15/6/2021 | 116 | None                   | None                                        |
| C4.866 | 4 | 26 | Female | Negative | Negative | No | No     | No | 2nd dose     | Vaxzevria (Astra-Zeneca) | Comirnaty (Biontech) | 18/5/2021 | 144 | None                   | None                                        |
| C4.867 | 4 | 57 | Male   | Negative | Negative | No | No     | No | 2nd dose     | Comirnaty (Biontech)     | Comirnaty (Biontech) | 18/6/2021 | 113 | None                   | None                                        |
| C4.868 | 4 | 29 | Female | Negative | Negative | No | No     | No | 2nd dose     | Vaxzevria (Astra-Zeneca) | Comirnaty (Biontech) | 9/7/2021  | 92  | None                   | None                                        |
| C4.869 | 4 | 69 | Male   | Negative | Negative | No | Unsure | No | 1st dose     | Johnson & Johnson        |                      | 4/6/2021  | 127 | None                   | None                                        |
| C4.870 | 4 | 28 | Female | Negative | Negative | No | No     | No | 2nd dose     | Comirnaty (Biontech)     | Comirnaty (Biontech) | 19/5/2021 | 143 | None                   | None                                        |
| C4.871 | 4 | 37 | Female | Negative | Negative | No | No     | No | 2nd dose     | Covid-19 (Moderna)       | Covid-19 (Moderna)   | 18/5/2021 | 144 | None                   | None                                        |

|        |   |    |        |          |          |    |        |    |              |                          |                          |           |     |                                                                         |                                                             |
|--------|---|----|--------|----------|----------|----|--------|----|--------------|--------------------------|--------------------------|-----------|-----|-------------------------------------------------------------------------|-------------------------------------------------------------|
| C4.872 | 4 | 28 | Female | Negative | Negative | No | No     | No | 2nd dose     | Comirnaty (Biontech)     | Comirnaty (Biontech)     | 22/5/2021 | 140 | None                                                                    | None                                                        |
| C4.873 | 4 | 38 | Female | Negative | Negative | No | No     | No | 2nd dose     | Comirnaty (Biontech)     | Comirnaty (Biontech)     | 29/5/2021 | 133 | None                                                                    | None                                                        |
| C4.874 | 4 | 37 | Male   | Negative | Negative | No | No     | No | 1st dose     | Johnson & Johnson        |                          | 7/5/2021  | 155 | None                                                                    | None                                                        |
| C4.875 | 4 | 36 | Male   | Negative | Negative | No | No     | No | 2nd dose     | Comirnaty (Biontech)     | Comirnaty (Biontech)     | 26/6/2021 | 105 | Asthma                                                                  | Salmeterol+fluticasone                                      |
| C4.876 | 4 | 39 | Female | Negative | Negative | No | Unsure | No | Unvaccinated |                          |                          |           |     | None                                                                    | None                                                        |
| C4.877 | 4 | 27 | Female | Negative | Negative | No | No     | No | 2nd dose     | Comirnaty (Biontech)     | Comirnaty (Biontech)     | 8/6/2021  | 123 | Cardiovascular disorder                                                 | Rivaroxaban                                                 |
| C4.878 | 4 | 26 | Male   | Negative | Negative | No | No     | No | 2nd dose     | Comirnaty (Biontech)     | Comirnaty (Biontech)     | 25/5/2021 | 137 | None                                                                    | None                                                        |
| C4.879 | 4 | 20 | Female | Negative | Negative | No | No     | No | 2nd dose     | Covid-19 (Moderna)       | Covid-19 (Moderna)       | 29/4/2021 | 163 | None                                                                    | None                                                        |
| C4.880 | 4 | 24 | Female | Negative | Negative | No | No     | No | 2nd dose     | Comirnaty (Biontech)     | Comirnaty (Biontech)     | 3/2/2021  | 248 | None                                                                    | None                                                        |
| C4.881 | 4 | 43 | Male   | Negative | Negative | No | No     | No | 2nd dose     | Comirnaty (Biontech)     | Comirnaty (Biontech)     | 11/6/2021 | 120 | None                                                                    | None                                                        |
| C4.882 | 4 | 28 | Female | Negative | Negative | No | No     | No | 1st dose     | Johnson & Johnson        |                          | 5/6/2021  | 126 | None                                                                    | None                                                        |
| C4.883 | 4 | 52 | Female | Negative | Negative | No | No     | No | 2nd dose     | Comirnaty (Biontech)     | Comirnaty (Biontech)     | 19/5/2021 | 143 | Diabetes type 2, hypertension, rheumatism, trachealstenosis, depression | Metformin, semaglutide, bisoprolol, infliximab, venlafaxine |
| C4.884 | 4 | 37 | Female | Negative | Negative | No | No     | No | 2nd dose     | Comirnaty (Biontech)     | Comirnaty (Biontech)     | 24/6/2021 | 107 | None                                                                    | None                                                        |
| C4.885 | 4 | 28 | Female | Negative | Negative | No | No     | No | 2nd dose     | Comirnaty (Biontech)     | Comirnaty (Biontech)     | 7/7/2021  | 94  | None                                                                    | None                                                        |
| C4.886 | 4 | 23 | Male   | Negative | Negative | No | No     | No | 2nd dose     | Vaxzevria (Astra-Zeneca) | Vaxzevria (Astra-Zeneca) | 30/6/2021 | 101 | None                                                                    | None                                                        |
| C4.887 | 4 | 28 | Female | Negative | Negative | No | No     | No | 2nd dose     | Comirnaty (Biontech)     | Comirnaty (Biontech)     | 26/6/2021 | 105 | None                                                                    | None                                                        |
| C4.888 | 4 | 27 | Female | Negative | Negative | No | No     | No | 2nd dose     | Comirnaty (Biontech)     | Comirnaty (Biontech)     | 13/7/2021 | 88  | None                                                                    | None                                                        |
| C4.889 | 4 | 27 | Female | Negative | Negative | No | No     | No | 2nd dose     | Comirnaty (Biontech)     | Comirnaty (Biontech)     | 12/7/2021 | 89  | None                                                                    | None                                                        |
| C4.890 | 4 | 42 | Female | Negative | Negative | No | Unsure | No | 2nd dose     | Comirnaty (Biontech)     | Comirnaty (Biontech)     | 17/8/2021 | 53  | None                                                                    | None                                                        |
| C4.891 | 4 | 20 | Female | Negative | Negative | No | No     | No | 2nd dose     | Covid-19 (Moderna)       | Covid-19 (Moderna)       | 10/7/2021 | 91  | None                                                                    | None                                                        |
| C4.892 | 4 | 25 | Male   | Negative | Negative | No | No     | No | 2nd dose     | Comirnaty (Biontech)     | Comirnaty (Biontech)     | 26/7/2021 | 75  | None                                                                    | None                                                        |

|        |   |    |        |          |          |    |        |    |              |                          |                          |           |     |              |                     |
|--------|---|----|--------|----------|----------|----|--------|----|--------------|--------------------------|--------------------------|-----------|-----|--------------|---------------------|
| C4.893 | 4 | 53 | Male   | Negative | Negative | No | No     | No | 2nd dose     | Comirnaty (Biontech)     | Comirnaty (Biontech)     | 8/6/2021  | 123 | None         | None                |
| C4.894 | 4 | 45 | Female | Negative | Negative | No | No     | No | 2nd dose     | Comirnaty (Biontech)     | Comirnaty (Biontech)     | 22/6/2021 | 109 | None         | None                |
| C4.895 | 4 | 40 | Female | Negative | Negative | No | No     | No | 2nd dose     | Vaxzevria (Astra-Zeneca) | Comirnaty (Biontech)     | 6/5/2021  | 156 | None         | None                |
| C4.896 | 4 | 26 | Female | Negative | Negative | No | No     | No | 2nd dose     | Comirnaty (Biontech)     | Comirnaty (Biontech)     | 19/6/2021 | 112 | None         | None                |
| C4.897 | 4 | 37 | Female | Negative | Negative | No | No     | No | Unvaccinated |                          |                          |           |     | None         | None                |
| C4.898 | 4 | 50 | Female | Negative | Negative | No | No     | No | 2nd dose     | Comirnaty (Biontech)     | Comirnaty (Biontech)     | 20/8/2021 | 50  | Asthma       | Budesonide          |
| C4.899 | 4 | 24 | Female | Negative | Negative | No | No     | No | 2nd dose     | Comirnaty (Biontech)     | Comirnaty (Biontech)     | 9/6/2021  | 122 | None         | None                |
| C4.900 | 4 | 21 | Female | Negative | Negative | No | No     | No | 2nd dose     | Comirnaty (Biontech)     | Comirnaty (Biontech)     | 16/8/2021 | 54  | None         | None                |
| C4.901 | 4 | 20 | Male   | Negative | Negative | No | Yes    | No | 1st dose     | Comirnaty (Biontech)     |                          | 23/7/2021 | 78  | None         | None                |
| C4.902 | 4 | 29 | Female | Negative | Negative | No | Unsure | No | 2nd dose     | Comirnaty (Biontech)     | Comirnaty (Biontech)     | 9/6/2021  | 122 | None         | None                |
| C4.903 | 4 | 49 | Male   | Negative | Negative | No | No     | No | 1st dose     | Johnson & Johnson        |                          | 8/6/2021  | 123 | None         | None                |
| C4.904 | 4 | 25 | Female | Negative | Negative | No | No     | No | 2nd dose     | Comirnaty (Biontech)     | Comirnaty (Biontech)     | 30/7/2021 | 71  | None         | None                |
| C4.905 | 4 | 20 | Female | Negative | Negative | No | Yes    | No | 2nd dose     | Covid-19 (Moderna)       | Covid-19 (Moderna)       | 2/9/2021  | 37  | None         | None                |
| C4.906 | 4 | 25 | Female | Negative | Negative | No | No     | No | 2nd dose     | Vaxzevria (Astra-Zeneca) | Vaxzevria (Astra-Zeneca) | 25/5/2021 | 137 | None         | None                |
| C4.907 | 4 | 27 | Male   | Negative | Negative | No | No     | No | 2nd dose     | Comirnaty (Biontech)     | Comirnaty (Biontech)     | 3/8/2021  | 67  | None         | None                |
| C4.908 | 4 | 22 | Female | Negative | Negative | No | No     | No | 2nd dose     | Covid-19 (Moderna)       | Covid-19 (Moderna)       | 27/5/2021 | 135 | None         | None                |
| C4.909 | 4 | 38 | Female | Negative | Negative | No | No     | No | 2nd dose     | Covid-19 (Moderna)       | Covid-19 (Moderna)       | 15/6/2021 | 116 | None         | None                |
| C4.910 | 4 | 45 | Male   | Negative | Negative | No | No     | No | 2nd dose     | Comirnaty (Biontech)     | Comirnaty (Biontech)     | N/A       | N/A | None         | None                |
| C4.911 | 4 | 43 | Male   | Negative | Negative | No | No     | No | 2nd dose     | Comirnaty (Biontech)     | Comirnaty (Biontech)     | 30/7/2021 | 71  | Hypertension | Amlodipin, ramipril |
| C4.912 | 4 | 39 | Female | Negative | Negative | No | No     | No | 2nd dose     | Comirnaty (Biontech)     | Comirnaty (Biontech)     | 15/7/2021 | 86  | None         | None                |
| C4.913 | 4 | 27 | Female | Negative | Negative | No | No     | No | 2nd dose     | Comirnaty (Biontech)     | Comirnaty (Biontech)     | 15/6/2021 | 116 | None         | None                |
| C4.914 | 4 | 44 | Male   | Negative | Negative | No | No     | No | 2nd dose     | Comirnaty (Biontech)     | Comirnaty (Biontech)     | 23/6/2021 | 108 | None         | None                |

|        |   |    |        |          |          |    |        |    |              |                          |                      |           |     |                         |                                                        |
|--------|---|----|--------|----------|----------|----|--------|----|--------------|--------------------------|----------------------|-----------|-----|-------------------------|--------------------------------------------------------|
| C4.915 | 4 | 26 | Male   | Negative | Negative | No | No     | No | 2nd dose     | Covid-19 (Moderna)       | Covid-19 (Moderna)   | 17/6/2021 | 114 | Asthma, neurodermatitis | Tiotropium bromide, fluticasone+vilanterol, omalizumab |
| C4.916 | 4 | 18 | Female | Negative | Negative | No | No     | No | 2nd dose     | Comirnaty (Biontech)     | Comirnaty (Biontech) | N/A       | N/A | None                    | None                                                   |
| C4.917 | 4 | 29 | Male   | Negative | Negative | No | No     | No | 2nd dose     | Covid-19 (Moderna)       | Covid-19 (Moderna)   | 5/8/2021  | 65  | None                    | None                                                   |
| C4.918 | 4 | 24 | Female | Negative | Negative | No | No     | No | 1st dose     | Johnson & Johnson        |                      | 6/9/2021  | 33  | None                    | None                                                   |
| C4.919 | 4 | 33 | Male   | Negative | Negative | No | No     | No | 1st dose     | Johnson & Johnson        |                      | 8/6/2021  | 123 | None                    | None                                                   |
| C4.920 | 4 | 24 | Male   | Negative | Negative | No | No     | No | 2nd dose     | Vaxzevria (Astra-Zeneca) | Comirnaty (Biontech) | 23/7/2021 | 78  | None                    | None                                                   |
| C4.921 | 4 | 30 | Male   | Negative | Negative | No | No     | No | 1st dose     | Johnson & Johnson        |                      | 20/8/2021 | 50  | None                    | None                                                   |
| C4.922 | 4 | 38 | Female | Negative | Negative | No | No     | No | 2nd dose     | Comirnaty (Biontech)     | Comirnaty (Biontech) | N/A       | N/A | N/A                     | N/A                                                    |
| C4.923 | 4 | 22 | Female | Negative | Negative | No | No     | No | 2nd dose     | Comirnaty (Biontech)     | Comirnaty (Biontech) | 22/7/2021 | 79  | None                    | None                                                   |
| C4.924 | 4 | 19 | Female | Negative | Negative | No | No     | No | 2nd dose     | Covid-19 (Moderna)       | Covid-19 (Moderna)   | 3/5/2021  | 159 | None                    | None                                                   |
| C4.925 | 4 | 53 | Female | Negative | Negative | No | No     | No | 2nd dose     | Comirnaty (Biontech)     | Comirnaty (Biontech) | 15/7/2021 | 86  | None                    | None                                                   |
| C4.926 | 4 | 39 | Female | Negative | Negative | No | No     | No | Unvaccinated |                          |                      |           |     | None                    | None                                                   |
| C4.927 | 4 | 23 | Female | Negative | Negative | No | No     | No | 2nd dose     | Comirnaty (Biontech)     | Comirnaty (Biontech) | 16/7/2021 | 85  | None                    | None                                                   |
| C4.928 | 4 | 23 | Male   | Negative | Negative | No | No     | No | 2nd dose     | Comirnaty (Biontech)     | Comirnaty (Biontech) | 20/6/2021 | 111 | None                    | None                                                   |
| C4.929 | 4 | 38 | Male   | Negative | Negative | No | Unsure | No | 2nd dose     | Vaxzevria (Astra-Zeneca) | Comirnaty (Biontech) | 7/7/2021  | 94  | None                    | None                                                   |
| C4.930 | 4 | 30 | Male   | Negative | Negative | No | No     | No | 2nd dose     | Comirnaty (Biontech)     | Comirnaty (Biontech) | 3/2/2021  | 248 | None                    | None                                                   |
| C4.931 | 4 | 27 | Female | Negative | Negative | No | No     | No | 2nd dose     | Comirnaty (Biontech)     | Comirnaty (Biontech) | 29/9/2021 | 10  | None                    | None                                                   |
| C4.932 | 4 | 27 | Female | Negative | Negative | No | No     | No | 2nd dose     | Covid-19 (Moderna)       | Covid-19 (Moderna)   | 13/5/2021 | 149 | None                    | None                                                   |
| C4.933 | 4 | 21 | Male   | Negative | Negative | No | No     | No | 2nd dose     | Comirnaty (Biontech)     | Comirnaty (Biontech) | 23/6/2021 | 108 | None                    | None                                                   |
| C4.934 | 4 | 21 | Female | Negative | Negative | No | No     | No | 2nd dose     | Covid-19 (Moderna)       | Covid-19 (Moderna)   | 7/6/2021  | 124 | Mental disorder         | Fluoxetine                                             |
| C4.935 | 4 | 25 | Male   | Negative | Negative | No | No     | No | Unvaccinated |                          |                      |           |     | None                    | None                                                   |



|        |   |    |        |          |          |    |        |    |          |                          |                      |           |     |                      |                                       |
|--------|---|----|--------|----------|----------|----|--------|----|----------|--------------------------|----------------------|-----------|-----|----------------------|---------------------------------------|
| C4.936 | 4 | 18 | Female | Negative | Negative | No | No     | No | 2nd dose | Comirnaty (Biontech)     | Comirnaty (Biontech) | 11/6/2021 | 120 | None                 | None                                  |
| C4.937 | 4 | 53 | Male   | Negative | Negative | No | No     | No | 2nd dose | Vaxzevria (Astra-Zeneca) | Comirnaty (Biontech) | 12/8/2021 | 58  | None                 | None                                  |
| C4.938 | 4 | 27 | Male   | Negative | Negative | No | No     | No | 2nd dose | Comirnaty (Biontech)     | Comirnaty (Biontech) | 9/7/2021  | 92  | None                 | None                                  |
| C4.939 | 4 | 24 | Female | Negative | Negative | No | No     | No | 2nd dose | Vaxzevria (Astra-Zeneca) | Comirnaty (Biontech) | 4/6/2021  | 127 | None                 | None                                  |
| C4.940 | 4 | 25 | Male   | Negative | Negative | No | No     | No | 2nd dose | Covid-19 (Moderna)       | Covid-19 (Moderna)   | 8/7/2021  | 93  | None                 | None                                  |
| C4.941 | 4 | 20 | Male   | Negative | Negative | No | Unsure | No | 2nd dose | Comirnaty (Biontech)     | Comirnaty (Biontech) | 21/7/2021 | 80  | None                 | None                                  |
| C4.942 | 4 | 21 | Male   | Negative | Negative | No | No     | No | 2nd dose | Comirnaty (Biontech)     | Comirnaty (Biontech) | 15/7/2021 | 86  | None                 | None                                  |
| C4.943 | 4 | 26 | Male   | Negative | Negative | No | No     | No | 2nd dose | Comirnaty (Biontech)     | Comirnaty (Biontech) | N/A       | N/A | None                 | None                                  |
| C4.944 | 4 | 29 | Male   | Negative | Negative | No | No     | No | 2nd dose | Comirnaty (Biontech)     | Comirnaty (Biontech) | 20/6/2021 | 111 | None                 | None                                  |
| C4.945 | 4 | 25 | Female | Negative | Negative | No | No     | No | 2nd dose | Comirnaty (Biontech)     | Comirnaty (Biontech) | 16/6/2021 | 115 | None                 | None                                  |
| C4.946 | 4 | 47 | Male   | Negative | Negative | No | No     | No | 2nd dose | Comirnaty (Biontech)     | Comirnaty (Biontech) | 9/6/2021  | 122 | Hypertension, asthma | Beclomethasone+formoterol, bisoprolol |
| C4.947 | 4 | 38 | Female | Negative | Negative | No | No     | No | 2nd dose | Comirnaty (Biontech)     | Comirnaty (Biontech) | N/A       | N/A | None                 | None                                  |
| C4.948 | 4 | 31 | Female | Negative | Negative | No | No     | No | 2nd dose | Comirnaty (Biontech)     | Comirnaty (Biontech) | 21/5/2021 | 141 | None                 | None                                  |
| C4.949 | 4 | 31 | Male   | Negative | Negative | No | No     | No | 2nd dose | Comirnaty (Biontech)     | Comirnaty (Biontech) | 29/5/2021 | 133 | None                 | None                                  |
| C4.950 | 4 | 26 | Male   | Negative | Negative | No | No     | No | 2nd dose | Vaxzevria (Astra-Zeneca) | Comirnaty (Biontech) | 4/8/2021  | 66  | None                 | None                                  |
| C4.951 | 4 | 21 | Male   | Negative | Negative | No | No     | No | 2nd dose | Comirnaty (Biontech)     | Comirnaty (Biontech) | 30/6/2021 | 101 | None                 | None                                  |
| C4.952 | 4 | 32 | Male   | Negative | Negative | No | No     | No | 2nd dose | Comirnaty (Biontech)     | Comirnaty (Biontech) | 11/6/2021 | 120 | None                 | None                                  |
| C4.953 | 4 | 25 | Male   | Negative | Negative | No | No     | No | 2nd dose | Comirnaty (Biontech)     | Comirnaty (Biontech) | 25/6/2021 | 106 | None                 | None                                  |
| C4.954 | 4 | 38 | Male   | Negative | Negative | No | No     | No | 2nd dose | Comirnaty (Biontech)     | Comirnaty (Biontech) | 21/6/2021 | 110 | Hypertension         | Antihypertensives                     |
| C4.955 | 4 | 25 | Female | Negative | Negative | No | No     | No | 2nd dose | Vaxzevria (Astra-Zeneca) | Comirnaty (Biontech) | 14/6/2021 | 117 | Hypertension         | Bisoprolol, ramipril                  |

|        |   |    |        |          |          |    |        |    |              |                      |                      |           |     |                   |                   |
|--------|---|----|--------|----------|----------|----|--------|----|--------------|----------------------|----------------------|-----------|-----|-------------------|-------------------|
| C4.956 | 4 | 33 | Female | Negative | Negative | No | No     | No | 1st dose     | Johnson & Johnson    |                      | 8/6/2021  | 123 | None              | None              |
| C4.957 | 4 | 26 | Female | Negative | Negative | No | No     | No | 2nd dose     | Comirnaty (Biontech) | Comirnaty (Biontech) | 20/7/2021 | 81  | None              | None              |
| C4.958 | 4 | 48 | Female | Negative | Negative | No | No     | No | 2nd dose     | Comirnaty (Biontech) | Comirnaty (Biontech) | 20/6/2021 | 111 | None              | None              |
| C4.959 | 4 | 47 | Male   | Negative | Negative | No | No     | No | 2nd dose     | Comirnaty (Biontech) | Comirnaty (Biontech) | 1/6/2021  | 130 | None              | None              |
| C4.960 | 4 | 51 | Male   | Negative | Negative | No | Unsure | No | Unvaccinated |                      |                      |           |     | None              | None              |
| C4.961 | 4 | 31 | Female | Negative | Negative | No | No     | No | 2nd dose     | Comirnaty (Biontech) | Comirnaty (Biontech) | 21/5/2021 | 141 | None              | None              |
| C4.962 | 4 | 24 | Male   | Negative | Negative | No | No     | No | 2nd dose     | Comirnaty (Biontech) | Comirnaty (Biontech) | 27/7/2021 | 74  | None              | None              |
| C4.963 | 4 | 35 | Male   | Negative | Negative | No | No     | No | 2nd dose     | Covid-19 (Moderna)   | Covid-19 (Moderna)   | 31/5/2021 | 131 | Hypertension      | Antihypertensives |
| C4.964 | 4 | 34 | Male   | Negative | Negative | No | No     | No | 2nd dose     | Comirnaty (Biontech) | Comirnaty (Biontech) | 1/6/2021  | 130 | None              | None              |
| C4.965 | 4 | 36 | Male   | Negative | Negative | No | No     | No | 2nd dose     | Comirnaty (Biontech) | Comirnaty (Biontech) | 19/7/2021 | 82  | Chronic urticaria | Omalizumab        |
| C4.966 | 4 | 20 | Female | Negative | Negative | No | No     | No | 2nd dose     | Comirnaty (Biontech) | Comirnaty (Biontech) | N/A       | N/A | None              | None              |
| C4.967 | 4 | 36 | Female | Negative | Negative | No | No     | No | 2nd dose     | Comirnaty (Biontech) | Comirnaty (Biontech) | 23/7/2021 | 78  | None              | None              |
| C4.968 | 4 | 35 | Male   | Negative | Negative | No | No     | No | Unvaccinated |                      |                      |           |     | None              | None              |
| C4.969 | 4 | 47 | Female | Negative | Negative | No | No     | No | Unvaccinated |                      |                      |           |     | None              | None              |
| C4.970 | 4 | 24 | Male   | Negative | Negative | No | No     | No | 2nd dose     | Covid-19 (Moderna)   | Covid-19 (Moderna)   | 30/7/2021 | 71  | None              | None              |
| C4.971 | 4 | 32 | Female | Negative | Negative | No | No     | No | 2nd dose     | Comirnaty (Biontech) | Comirnaty (Biontech) | 9/6/2021  | 122 | None              | None              |
| C4.972 | 4 | 20 | Male   | Negative | Negative | No | No     | No | 2nd dose     | Comirnaty (Biontech) | Comirnaty (Biontech) | 7/7/2021  | 94  | None              | None              |
| C4.973 | 4 | 41 | Female | Negative | Negative | No | No     | No | Unvaccinated |                      |                      |           |     | None              | None              |
| C4.974 | 4 | 25 | Male   | Negative | Negative | No | No     | No | 2nd dose     | Covid-19 (Moderna)   | Covid-19 (Moderna)   | N/A       | N/A | None              | None              |
| C4.975 | 4 | 27 | Female | Negative | Negative | No | No     | No | 2nd dose     | Comirnaty (Biontech) | Comirnaty (Biontech) | 20/7/2021 | 81  | None              | None              |
| C4.976 | 4 | 40 | Male   | Negative | Negative | No | No     | No | 2nd dose     | Comirnaty (Biontech) | Comirnaty (Biontech) | 17/8/2021 | 53  | None              | None              |
| C4.977 | 4 | 60 | Male   | Negative | Negative | No | No     | No | 2nd dose     | Comirnaty (Biontech) | Comirnaty (Biontech) | 5/6/2021  | 126 | None              | None              |
| C4.978 | 4 | 56 | Female | Negative | Negative | No | No     | No | 2nd dose     | Comirnaty (Biontech) | Comirnaty (Biontech) | 29/5/2021 | 133 | None              | None              |
| C4.979 | 4 | 28 | Female | Negative | Negative | No | No     | No | 2nd dose     | Comirnaty (Biontech) | Comirnaty (Biontech) | 26/6/2021 | 105 | Crohn's disease   | None              |

|         |   |     |        |          |          |    |     |     |              |                          |                          |           |     |                                |      |
|---------|---|-----|--------|----------|----------|----|-----|-----|--------------|--------------------------|--------------------------|-----------|-----|--------------------------------|------|
| C4.980  | 4 | 28  | Male   | Negative | Negative | No | No  | No  | 2nd dose     | Comirnaty (Biontech)     | Comirnaty (Biontech)     | 5/6/2021  | 126 | None                           | None |
| C4.981  | 4 | 37  | Male   | Negative | Negative | No | No  | No  | Unvaccinated |                          |                          |           |     | None                           | None |
| C4.982  | 4 | 31  | Female | Negative | Negative | No | No  | No  | 2nd dose     | Vaxzevria (Astra-Zeneca) | Comirnaty (Biontech)     | 17/6/2021 | 114 | None                           | None |
| C4.983  | 4 | 43  | Female | Negative | Negative | No | No  | No  | 2nd dose     | Comirnaty (Biontech)     | Comirnaty (Biontech)     | 26/5/2021 | 136 | None                           | None |
| C4.984  | 4 | 23  | Female | Negative | Negative | No | No  | No  | 2nd dose     | Comirnaty (Biontech)     | Comirnaty (Biontech)     | 28/5/2021 | 134 | None                           | None |
| C4.985  | 4 | 24  | Male   | Negative | Negative | No | No  | No  | 2nd dose     | Comirnaty (Biontech)     | Comirnaty (Biontech)     | 25/5/2021 | 137 | None                           | None |
| C4.986  | 4 | 47  | Female | Negative | Negative | No | No  | No  | 2nd dose     | Covid-19 (Moderna)       | Covid-19 (Moderna)       | 14/7/2021 | 87  | None                           | None |
| C4.987  | 4 | 33  | Male   | Negative | Negative | No | No  | No  | 2nd dose     | Covid-19 (Moderna)       | Covid-19 (Moderna)       | 19/7/2021 | 82  | None                           | None |
| C4.988  | 4 | 50  | Female | Negative | Negative | No | No  | No  | 2nd dose     | Vaxzevria (Astra-Zeneca) | Vaxzevria (Astra-Zeneca) | 29/6/2021 | 102 | Menopausal bleeding, hay fever | None |
| C4.989  | 4 | N/A | N/A    | Negative | Negative | No | N/A | N/A | N/A          | N/A                      | N/A                      | N/A       | N/A | N/A                            | N/A  |
| C4.990  | 4 | N/A | N/A    | Negative | Negative | No | N/A | N/A | N/A          | N/A                      | N/A                      | N/A       | N/A | N/A                            | N/A  |
| C4.991  | 4 | N/A | N/A    | Negative | Negative | No | N/A | N/A | N/A          | N/A                      | N/A                      | N/A       | N/A | N/A                            | N/A  |
| C4.992  | 4 | N/A | N/A    | Negative | Negative | No | N/A | N/A | N/A          | N/A                      | N/A                      | N/A       | N/A | N/A                            | N/A  |
| C4.993  | 4 | N/A | N/A    | Negative | Negative | No | N/A | N/A | N/A          | N/A                      | N/A                      | N/A       | N/A | N/A                            | N/A  |
| C4.994  | 4 | N/A | N/A    | Negative | Negative | No | N/A | N/A | N/A          | N/A                      | N/A                      | N/A       | N/A | N/A                            | N/A  |
| C4.995  | 4 | N/A | N/A    | Negative | Negative | No | N/A | N/A | N/A          | N/A                      | N/A                      | N/A       | N/A | N/A                            | N/A  |
| C4.996  | 4 | N/A | N/A    | Negative | Negative | No | N/A | N/A | N/A          | N/A                      | N/A                      | N/A       | N/A | N/A                            | N/A  |
| C4.997  | 4 | N/A | N/A    | Negative | Negative | No | N/A | N/A | N/A          | N/A                      | N/A                      | N/A       | N/A | N/A                            | N/A  |
| C4.998  | 4 | N/A | N/A    | Negative | Negative | No | N/A | N/A | N/A          | N/A                      | N/A                      | N/A       | N/A | N/A                            | N/A  |
| C4.999  | 4 | N/A | N/A    | Negative | Negative | No | N/A | N/A | N/A          | N/A                      | N/A                      | N/A       | N/A | N/A                            | N/A  |
| C4.1000 | 4 | N/A | N/A    | Negative | Negative | No | N/A | N/A | N/A          | N/A                      | N/A                      | N/A       | N/A | N/A                            | N/A  |
| C4.1001 | 4 | N/A | N/A    | Negative | Negative | No | N/A | N/A | N/A          | N/A                      | N/A                      | N/A       | N/A | N/A                            | N/A  |
| C4.1002 | 4 | N/A | N/A    | Negative | Negative | No | N/A | N/A | N/A          | N/A                      | N/A                      | N/A       | N/A | N/A                            | N/A  |
| C4.1003 | 4 | N/A | N/A    | Negative | Negative | No | N/A | N/A | N/A          | N/A                      | N/A                      | N/A       | N/A | N/A                            | N/A  |
| C4.1004 | 4 | N/A | N/A    | Negative | Negative | No | N/A | N/A | N/A          | N/A                      | N/A                      | N/A       | N/A | N/A                            | N/A  |
| C4.1005 | 4 | N/A | N/A    | Negative | Negative | No | N/A | N/A | N/A          | N/A                      | N/A                      | N/A       | N/A | N/A                            | N/A  |
| C4.1006 | 4 | N/A | N/A    | Negative | Negative | No | N/A | N/A | N/A          | N/A                      | N/A                      | N/A       | N/A | N/A                            | N/A  |
| C4.1007 | 4 | N/A | N/A    | Negative | Negative | No | N/A | N/A | N/A          | N/A                      | N/A                      | N/A       | N/A | N/A                            | N/A  |

|         |   |     |     |          |          |    |     |     |     |     |     |     |     |     |     |     |
|---------|---|-----|-----|----------|----------|----|-----|-----|-----|-----|-----|-----|-----|-----|-----|-----|
| C4.1008 | 4 | N/A | N/A | Negative | Negative | No | N/A |
| C4.1009 | 4 | N/A | N/A | Negative | Negative | No | N/A |
| C4.1010 | 4 | N/A | N/A | Negative | Negative | No | N/A |
| C4.1011 | 4 | N/A | N/A | Negative | Negative | No | N/A |
| C4.1012 | 4 | N/A | N/A | Negative | Negative | No | N/A |
| C4.1013 | 4 | N/A | N/A | Negative | Negative | No | N/A |
| C4.1014 | 4 | N/A | N/A | Negative | Negative | No | N/A |
| C4.1015 | 4 | N/A | N/A | Negative | Negative | No | N/A |
| C4.1016 | 4 | N/A | N/A | Negative | Negative | No | N/A |
| C4.1017 | 4 | N/A | N/A | Negative | Negative | No | N/A |
| C4.1018 | 4 | N/A | N/A | Negative | Negative | No | N/A |
