# Supplementary material for: Canine real-time detection of SARS-CoV-2 infections in the context of a mass screening event
Source: PubMed Central journal article supplement — BMJ Glob Health. 2022 Nov 10;7(11):e010276. doi: 10.1136/bmjgh-2022-010276 (PMC9659709; doi:10.1136/bmjgh-2022-010276), 2022-11-10
Supplement: bmjgh-2022-010276supp002.pdf [file bmjgh-2022-010276supp002.pdf]

**Supplemental Table 2. Distribution of age of participants**

|                | <b>Age of the participants in years</b> |             |               |            |           |                |                        |                         |                |
|----------------|-----------------------------------------|-------------|---------------|------------|-----------|----------------|------------------------|-------------------------|----------------|
|                | <b>number of participants</b>           | <b>Mean</b> | <b>Median</b> | <b>STD</b> | <b>CV</b> | <b>Minimum</b> | <b>5%-<br/>Quantil</b> | <b>95%-<br/>Quantil</b> | <b>Maximum</b> |
| <b>Concert</b> |                                         |             |               |            |           |                |                        |                         |                |
| <b>1</b>       | 466                                     | 46.22       | 48.00         | 10.74      | 23.24     | 19.00          | 26.00                  | 61.00                   | 82.00          |
| <b>2</b>       | 640                                     | 38.88       | 38.00         | 11.60      | 29.83     | 18.00          | 22.00                  | 58.00                   | 74.00          |
| <b>3</b>       | 678                                     | 34.09       | 30.00         | 11.96      | 35.08     | 18.00          | 20.00                  | 57.00                   | 69.00          |
| <b>4</b>       | 1018                                    | 30.80       | 28.00         | 9.46       | 30.70     | 18.00          | 20.00                  | 51.00                   | 70.00          |
