# Supplementary material for: Canine real-time detection of SARS-CoV-2 infections in the context of a mass screening event
Source: PubMed Central journal article supplement — BMJ Glob Health. 2022 Nov 10;7(11):e010276. doi: 10.1136/bmjgh-2022-010276 (PMC9659709; doi:10.1136/bmjgh-2022-010276), 2022-11-10
Supplement: bmjgh-2022-010276supp003.pdf [file bmjgh-2022-010276supp003.pdf]

Supplemental table 3. Chronic diseases of the participants

|                                   | Disease                                     | Number of participants | Percentage |
|-----------------------------------|---------------------------------------------|------------------------|------------|
| <b>Metabolic disorders</b>        | Diabetes                                    | 40                     | 1.43%      |
|                                   | Insulin resistance                          | 2                      | 0.07%      |
| <b>Cardiovascular disorders</b>   | Hypertension                                | 195                    | 6.96%      |
|                                   | Cardiovascular disorder                     | 7                      | 0.25%      |
|                                   | Hypercholesterolemia                        | 6                      | 0.21%      |
|                                   | Heart failure                               | 3                      | 0.11%      |
|                                   | Coronary heart disease                      | 2                      | 0.07%      |
|                                   | Tachycardia                                 | 2                      | 0.07%      |
|                                   | Alpha-1-antitrypsin deficiency              | 2                      | 0.07%      |
|                                   | Cardiac arrhythmia                          | 1                      | 0.04%      |
|                                   | Aortic coarctation                          | 1                      | 0.04%      |
|                                   | Factor V deficiency                         | 1                      | 0.04%      |
|                                   | Willebrand von jürgens disease              | 1                      | 0.04%      |
|                                   | Factor II and VIII deficiency               | 1                      | 0.04%      |
|                                   | Prothrombin gene mutation                   | 1                      | 0.04%      |
| <b>Thyroid disorders</b>          | Hypothyroidism/Hashimoto                    | 104                    | 3.71%      |
|                                   | Thyroid removal                             | 4                      | 0.14%      |
|                                   | No thyroid                                  | 1                      | 0.04%      |
|                                   | Status post thyroid cancer                  | 1                      | 0.04%      |
|                                   | Chronic thyroiditis                         | 1                      | 0.04%      |
| <b>Mental disorders</b>           | Unspecified mental disorder                 | 15                     | 0.54%      |
|                                   | Depression                                  | 6                      | 0.21%      |
|                                   | Unspecified mental or neurological disorder | 4                      | 0.14%      |
|                                   | Bipolar disorder                            | 1                      | 0.04%      |
| <b>Dermatological disorders</b>   | Neurodermatitis                             | 6                      | 0.21%      |
|                                   | Psoriasis                                   | 3                      | 0.11%      |
|                                   | Chronic urticaria                           | 3                      | 0.11%      |
|                                   | Hidradenitis suppurative (acne inversa)     | 1                      | 0.04%      |
| <b>Oncological diseases</b>       | Breast cancer                               | 5                      | 0.18%      |
|                                   | Unspecified cancer                          | 1                      | 0.04%      |
|                                   | Colon cancer                                | 1                      | 0.04%      |
| <b>Respiratory disorders</b>      | Asthma                                      | 59                     | 2.11%      |
|                                   | Allergy                                     | 12                     | 0.43%      |
|                                   | Respiratory disorder                        | 3                      | 0.11%      |
|                                   | Chronic obstructive pulmonary disease       | 2                      | 0.07%      |
|                                   | Tracheal stenosis                           | 2                      | 0.07%      |
|                                   | Sleep apnoe                                 | 1                      | 0.04%      |
| <b>Renal disorders</b>            | Renal insufficiency                         | 3                      | 0.11%      |
|                                   | Hyperuricemia                               | 2                      | 0.07%      |
|                                   | Solitary kidney                             | 1                      | 0.04%      |
|                                   | Polycystic kidney disease                   | 1                      | 0.04%      |
| <b>Gastrointestinal disorders</b> | Crohn's disease                             | 9                      | 0.32%      |
|                                   | Unspecified gastrointestinal disorder       | 6                      | 0.21%      |
|                                   | Celiac disease                              | 2                      | 0.07%      |

|                                   |                                                 |    |       |
|-----------------------------------|-------------------------------------------------|----|-------|
| <b>Gastrointestinal disorders</b> | Ulcerative colitis                              | 2  | 0.07% |
|                                   | Colitis (other than IBD)                        | 1  | 0.04% |
|                                   | Diverticulitis                                  | 1  | 0.04% |
|                                   | Reflux                                          | 1  | 0.04% |
| <b>Orthopedic disorders</b>       | Rheumatic disease                               | 14 | 0.50% |
|                                   | Osteoporosis                                    | 1  | 0.04% |
|                                   | Arthritis                                       | 1  | 0.04% |
|                                   | Bechterew's disease                             | 1  | 0.04% |
|                                   | Collagenosis                                    | 1  | 0.04% |
|                                   | Acromegaly                                      | 1  | 0.04% |
| <b>Neurological disorders</b>     | Multiple sclerosis                              | 6  | 0.21% |
|                                   | Epilepsy                                        | 5  | 0.18% |
|                                   | Neurological disorder                           | 2  | 0.07% |
|                                   | Hand tremor                                     | 1  | 0.04% |
|                                   | Orthostatic leg tremor                          | 1  | 0.04% |
|                                   | Chronic pain syndrome                           | 1  | 0.04% |
|                                   | Tourette syndrome                               | 1  | 0.04% |
| <b>Infectious diseases</b>        | Human immunodeficiency virus                    | 3  | 0.11% |
|                                   | Fungal infection                                | 1  | 0.04% |
| <b>Ophthalmic diseases</b>        | Glaucoma                                        | 1  | 0.04% |
|                                   | Sicca syndrome                                  | 1  | 0.04% |
| <b>Gynaecological disorders</b>   | Endometriosis                                   | 2  | 0.07% |
|                                   | Menopausal bleeding                             | 1  | 0.04% |
| <b>Autoimmune disorders</b>       | Systemic lupus erythematoses                    | 1  | 0.04% |
|                                   | Autoimmune hepatitis                            | 1  | 0.04% |
|                                   | Autoimmune pancreatitis                         | 1  | 0.04% |
|                                   | Sjögren's-syndrome                              | 1  | 0.04% |
| <b>Other</b>                      | Primary sclerosing cholangitis                  | 2  | 0.07% |
|                                   | Atypic migraine headache since corona infection | 1  | 0.04% |
|                                   | Survived Miller fisher syndrome and leucemia    | 1  | 0.04% |
