# Supplementary material for: Canine real-time detection of SARS-CoV-2 infections in the context of a mass screening event
Source: PubMed Central journal article supplement — BMJ Glob Health. 2022 Nov 10;7(11):e010276. doi: 10.1136/bmjgh-2022-010276 (PMC9659709; doi:10.1136/bmjgh-2022-010276), 2022-11-10
Supplement: bmjgh-2022-010276supp004.pdf [file bmjgh-2022-010276supp004.pdf]

Supplemental Table 4. Chronic medication of the participants

| Medication                      | Number of participants | Percentage |
|---------------------------------|------------------------|------------|
| Abacavir                        | 1                      | 0.04%      |
| ACE-inhibitor                   | 1                      | 0.04%      |
| Acetylsalicylic acid            | 6                      | 0.21%      |
| Adalimumab                      | 1                      | 0.04%      |
| Allopurinol                     | 4                      | 0.14%      |
| Amitriptylin                    | 1                      | 0.04%      |
| Amlodipine                      | 20                     | 0.71%      |
| Anastrozole                     | 1                      | 0.04%      |
| Antidiabetics                   | 1                      | 0.04%      |
| Antihypertensives               | 12                     | 0.43%      |
| Apixaban                        | 5                      | 0.18%      |
| Aripiprazole                    | 2                      | 0.07%      |
| Asthma inhaler                  | 4                      | 0.14%      |
| Atorvastatin                    | 6                      | 0.21%      |
| Azathioprine                    | 4                      | 0.14%      |
| Beclomethasone                  | 10                     | 0.36%      |
| Beta-blocker                    | 4                      | 0.14%      |
| Bictegravir                     | 1                      | 0.04%      |
| Bisoprolol                      | 1                      | 0.04%      |
| Blood thinner                   | 1                      | 0.04%      |
| Budesonide                      | 14                     | 0.50%      |
| Bupropion                       | 3                      | 0.11%      |
| Candesartan                     | 52                     | 1.86%      |
| Carbamazepin                    | 1                      | 0.04%      |
| Carbimazole                     | 1                      | 0.04%      |
| Cetirizine                      | 3                      | 0.11%      |
| Chemotherapy                    | 2                      | 0.07%      |
| Chlormadinone                   | 1                      | 0.04%      |
| Chlorthalidone                  | 5                      | 0.18%      |
| Cholecalciferol                 | 3                      | 0.11%      |
| Cholesterol reducing medication | 1                      | 0.04%      |
| Cimetidine                      | 1                      | 0.04%      |
| Citalopram                      | 8                      | 0.29%      |
| Clonazepam                      | 1                      | 0.04%      |
| Cortisone                       | 3                      | 0.11%      |
| Cromoglicic acid                | 1                      | 0.04%      |
| Dapagliflozin                   | 1                      | 0.04%      |
| Darunavir                       | 1                      | 0.04%      |
| Desogestrel                     | 1                      | 0.04%      |
| Dihydralazine                   | 1                      | 0.04%      |
| Diltiazem                       | 1                      | 0.04%      |
| Dimethyl fumarate               | 1                      | 0.04%      |
| Dolutegravir                    | 1                      | 0.04%      |
| Doxazosin                       | 1                      | 0.04%      |
| Dulaglutide                     | 1                      | 0.04%      |

|                        |     |       |
|------------------------|-----|-------|
| Duloxetine             | 1   | 0.04% |
| Ebastin                | 1   | 0.04% |
| Empagliflozin          | 2   | 0.07% |
| Emtricitabin           | 2   | 0.07% |
| Enalapril              | 3   | 0.11% |
| Escitalopram           | 5   | 0.18% |
| Esomeprazole           | 1   | 0.04% |
| Etanercept             | 1   | 0.04% |
| Etravirine             | 1   | 0.04% |
| Ezetemibe              | 1   | 0.04% |
| Fexofenadine           | 1   | 0.04% |
| Fluconazol             | 1   | 0.04% |
| Fluticasone            | 8   | 0.29% |
| Formoterol             | 20  | 0.71% |
| Furosemide             | 1   | 0.04% |
| Gabapentin             | 1   | 0.04% |
| Glatiramer acetate     | 2   | 0.07% |
| Hormones               | 1   | 0.04% |
| Hydroxychloroquin      | 2   | 0.07% |
| Hydrochlorothiazide    | 4   | 0.14% |
| Ibuprofen              | 1   | 0.04% |
| Immunsuppressors       | 1   | 0.04% |
| Indapamide             | 1   | 0.04% |
| Infliximab             | 4   | 0.14% |
| Insulin                | 20  | 0.71% |
| Irbesartan             | 1   | 0.04% |
| Ivabradine             | 1   | 0.04% |
| Lamivudin              | 1   | 0.04% |
| Lamotrigine            | 6   | 0.21% |
| Lanreotid              | 1   | 0.04% |
| Lansoprazole           | 1   | 0.04% |
| Latanoprost            | 1   | 0.04% |
| Lercanidipin           | 1   | 0.04% |
| Letrozole              | 3   | 0.11% |
| Liraglutide            | 1   | 0.04% |
| Lisinopril             | 1   | 0.04% |
| Lithium carbonate      | 2   | 0.07% |
| Loperamide             | 1   | 0.04% |
| Losartan               | 4   | 0.14% |
| L-thyroxine            | 109 | 3.89% |
| Mesalazine             | 2   | 0.07% |
| Metamizole             | 1   | 0.04% |
| Metformin              | 13  | 0.46% |
| Metforminhydrochloride | 1   | 0.04% |
| Methasone nasal spray  | 1   | 0.04% |
| Methotrexate           | 10  | 0.36% |
| Methylphenidat         | 3   | 0.11% |
| Metoprolol             | 17  | 0.61% |
| Milnacipran            | 1   | 0.04% |
| Mirtazapine            | 5   | 0.18% |

|                            |    |       |
|----------------------------|----|-------|
| Montelukast                | 2  | 0.07% |
| Moxonidine                 | 1  | 0.04% |
| Nebivolol                  | 4  | 0.14% |
| Ocrelizumab                | 1  | 0.04% |
| Olanzapine                 | 1  | 0.04% |
| Olmesartan                 | 1  | 0.04% |
| Omalizumab                 | 4  | 0.14% |
| Omeprazole                 | 4  | 0.14% |
| Pantoprazole               | 7  | 0.25% |
| Paracetamol                | 1  | 0.04% |
| Paroxetine                 | 2  | 0.07% |
| Prasugrel                  | 1  | 0.04% |
| Pertuzumab                 | 1  | 0.04% |
| Phenprocoumon              | 2  | 0.07% |
| Phosphorus-lowering agents | 1  | 0.04% |
| Pindolol                   | 1  | 0.04% |
| Pipamperone                | 1  | 0.04% |
| Potassium iodide           | 3  | 0.11% |
| Prednisolone               | 3  | 0.11% |
| Prednisone                 | 3  | 0.11% |
| Pregabalin                 | 4  | 0.14% |
| Primidone                  | 2  | 0.07% |
| Promethazine               | 1  | 0.04% |
| Propranolol                | 2  | 0.07% |
| Quetiapin                  | 1  | 0.04% |
| Ramipril                   | 65 | 2.32% |
| Reproterol                 | 1  | 0.04% |
| Ritonavir                  | 1  | 0.04% |
| Rivaroxaban                | 2  | 0.07% |
| Rosuvastatin               | 4  | 0.14% |
| Sacubitrile                | 1  | 0.04% |
| Salbutamol                 | 9  | 0.32% |
| Salmeterol                 | 5  | 0.18% |
| Secukinumab                | 1  | 0.04% |
| Semaglutide                | 2  | 0.07% |
| Sertraline                 | 5  | 0.18% |
| Simvastatin                | 6  | 0.21% |
| Sitagliptin                | 1  | 0.04% |
| Sodium hydrogen carbonate  | 1  | 0.04% |
| Spirolactone               | 1  | 0.04% |
| Sulfasalazine              | 1  | 0.04% |
| Tamoxifen                  | 1  | 0.04% |
| Tamsulosin                 | 1  | 0.04% |
| Tapentadol                 | 1  | 0.04% |
| Telmisartan                | 5  | 0.18% |
| Tenofovir alafenamide      | 1  | 0.04% |
| Tenofoviridisoproxil       | 1  | 0.04% |
| Teriflunomide              | 1  | 0.04% |
| Tianeptin                  | 1  | 0.04% |
| Timolol                    | 1  | 0.04% |

|                       |   |       |
|-----------------------|---|-------|
| Tiotropium bromide    | 1 | 0.04% |
| Topiramate            | 1 | 0.04% |
| Torsemide             | 2 | 0.07% |
| Trastuzumab           | 2 | 0.07% |
| Ursodesoxycholic acid | 1 | 0.04% |
| Ustekinumab           | 1 | 0.04% |
| Valproic acid         | 1 | 0.04% |
| Valsartan             | 8 | 0.29% |
| Vedolizumab           | 1 | 0.04% |
| Venlafaxine           | 3 | 0.11% |
| Verapamil             | 1 | 0.04% |
| Vilanterol            | 3 | 0.11% |
