# Supplementary material for: Canine real-time detection of SARS-CoV-2 infections in the context of a mass screening event
Source: PubMed Central journal article supplement — BMJ Glob Health. 2022 Nov 10;7(11):e010276. doi: 10.1136/bmjgh-2022-010276 (PMC9659709; doi:10.1136/bmjgh-2022-010276), 2022-11-10
Supplement: bmjgh-2022-010276supp005.pdf [file bmjgh-2022-010276supp005.pdf]

**Supplemental Table 5. Dogs**

| <b>Name</b> | <b>Sex</b> | <b>Age (years)</b> | <b>Breed</b>       | <b>Specialty</b>                                |
|-------------|------------|--------------------|--------------------|-------------------------------------------------|
| Donnie      | male       | 5                  | Malinois           | Explosive detection, protection work, obedience |
| Bellatrix   | female     | 2                  | Labrador Retriever | No previous training except obedience           |
| Margo       | female     | 2                  | Labrador Retriever | No previous training except obedience           |
| Erec junior | male       | 4                  | Malinois           | Explosive detection, protection work, obedience |
| Rebell      | male       | 3                  | Malinois           | Explosive detection work, obedience             |
| Drago       | male       | 4                  | German Sheperd Mix | Explosive detection work, obedience             |
| Baila       | female     | 4                  | German Shepherd    | Tracking, obedience, protection work            |
| Poldi       | male       | 10                 | Shepherd Mix       | Area search, obedience                          |
