# Supplementary material for: Canine real-time detection of SARS-CoV-2 infections in the context of a mass screening event
Source: PubMed Central journal article supplement — BMJ Glob Health. 2022 Nov 10;7(11):e010276. doi: 10.1136/bmjgh-2022-010276 (PMC9659709; doi:10.1136/bmjgh-2022-010276), 2022-11-10
Supplement: bmjgh-2022-010276supp006.pdf [file bmjgh-2022-010276supp006.pdf]

Supplemental table 2. Characteristics of the positive samples used for the study

| Sample ID | Sex    | Age (years) | Sample material | Beta propriolactone inactivation | Dog decision | SARS-CoV-2 RT-PCR (swab) | SARS-CoV-2 RT-PCR (sample material) |                                        | PoC-antigen test | Symptom status | Concert |
|-----------|--------|-------------|-----------------|----------------------------------|--------------|--------------------------|-------------------------------------|----------------------------------------|------------------|----------------|---------|
|           |        |             |                 |                                  |              |                          | PCR result SARS-CoV-2 (IP4_FAM)     | PCR result internal control (EGFP-HEX) |                  |                |         |
| 192011    | Male   | 33          | Urine           | Yes                              | No           | Positive                 | No Cq                               | 34.80                                  | N/A              | Moderate       | 1       |
| 189833    | Male   | 23          | Sweat           | Yes                              | No           | Positive                 | No Cq                               | 31.75                                  | N/A              | Mild           | 1       |
| 189846    | Female | 77          | Urine           | Yes                              | Yes          | Positive                 | No Cq                               | 31.78                                  | N/A              | Asymptomatic   | 1       |
| 192021    | Female | 68          | Urine           | Yes                              | No           | Positive                 | No Cq                               | 31.02                                  | N/A              | Moderate       | 1       |
| 191998    | Male   | 89          | Urine           | Yes                              | Yes          | Positive                 | No Cq                               | 31.32                                  | N/A              | Moderate       | 1       |
| 189739    | Female | 69          | Saliva          | Yes                              | Yes          | Positive                 | 34.31                               | 34.22                                  | N/A              | Moderate       | 1       |
| 192071    | Male   | 44          | Urine           | Yes                              | Yes          | Positive                 | No Cq                               | 32.84                                  | N/A              | Severe         | 1       |
| 192020    | Female | 55          | Urine           | Yes                              | Yes          | Positive                 | No Cq                               | 33.79                                  | N/A              | Severe         | 1       |
| 192019    | Female | 82          | Urine           | Yes                              | Yes          | Positive                 | No Cq                               | 33.62                                  | N/A              | Moderate       | 1       |
| 189743    | Female | 75          | Sweat           | Yes                              | No           | Positive                 | No Cq                               | 30.73                                  | N/A              | Moderate       | 2       |
| 192022    | Male   | 58          | Urine           | Yes                              | Yes          | Positive                 | No Cq                               | 33.74                                  | N/A              | Severe         | 2       |
| 192009    | Male   | 61          | Urine           | Yes                              | Yes          | Positive                 | No Cq                               | 34.38                                  | N/A              | Mild           | 2       |
| 189744    | Female | 57          | Sweat           | Yes                              | Yes          | Positive                 | No Cq                               | 30.67                                  | N/A              | Mild           | 2       |
| 189745    | Female | 24          | Urine           | Yes                              | Yes          | Positive                 | No Cq                               | 31.33                                  | N/A              | Mild           | 2       |
| 192008    | Male   | 63          | Urine           | Yes                              | Yes          | Positive                 | No Cq                               | 35.36                                  | N/A              | Moderate       | 2       |
| 192010    | Male   | 66          | Urine           | Yes                              | Yes          | Positive                 | No Cq                               | 34.54                                  | N/A              | Moderate       | 2       |
| 192028    | Male   | 55          | Urine           | Yes                              | Yes          | Positive                 | No Cq                               | 35.09                                  | N/A              | Moderate       | 2       |
| 192018    | Female | 70          | Urine           | Yes                              | Yes          | Positive                 | No Cq                               | 32.86                                  | N/A              | Moderate       | 2       |
| 192026    | Female | 67          | Urine           | Yes                              | No           | Positive                 | No Cq                               | 34.02                                  | N/A              | Severe         | 2       |
| 192057    | Female | 65          | Urine           | Yes                              | No           | Positive                 | No Cq                               | 33.09                                  | N/A              | Severe         | 3       |
| 189831    | Male   | 15          | Urine           | Yes                              | Yes          | Positive                 | No Cq                               | 31.24                                  | N/A              | Mild           | 3       |
| 192056    | Male   | 80          | Sweat           | Yes                              | Yes          | Positive                 | No Cq                               | 32.93                                  | N/A              | Moderate       | 3       |
| 189849    | Female | 16          | Urine           | Yes                              | Yes          | Positive                 | No Cq                               | 31.71                                  | N/A              | Mild           | 3       |
| 192064    | Female | 51          | Urine           | Yes                              | Yes          | Positive                 | No Cq                               | 33.00                                  | N/A              | Moderate       | 3       |
| 189382    | Female | 26          | Sweat           | Yes                              | Yes          | Positive                 | No Cq                               | 31.68                                  | N/A              | Mild           | 3       |
| 192065    | Male   | 85          | Urine           | Yes                              | No           | Positive                 | No Cq                               | 33.95                                  | N/A              | Moderate       | 3       |

|        |        |     |        |     |     |          |       |       |          |          |   |
|--------|--------|-----|--------|-----|-----|----------|-------|-------|----------|----------|---|
| 189848 | Female | 15  | Urine  | Yes | Yes | Positive | No Cq | 31.93 | N/A      | Mild     | 3 |
| P.Q    | Male   | N/A | Sweat  | No  | Yes | Positive | N/A   | N/A   | Positive | N/A      | 3 |
| P.6.1  | Female | N/A | Sweat  | No  | Yes | Positive | N/A   | N/A   | Positive | Mild     | 3 |
| P.L    | N/A    | N/A | N/A    | No  | Yes | Positive | N/A   | N/A   | N/A      | N/A      | 3 |
| 189828 | Female | 34  | Sweat  | Yes | Yes | Positive | No Cq | 31.68 | N/A      | Mild     | 4 |
| 189746 | Female | 24  | Urine  | Yes | Yes | Positive | No Cq | 31.09 | N/A      | Mild     | 4 |
| 189741 | Female | 75  | Sweat  | Yes | Yes | Positive | No Cq | 30.7  | N/A      | Severe   | 4 |
| 189830 | Female | 44  | Saliva | Yes | Yes | Positive | No Cq | 31.86 | N/A      | Mild     | 4 |
| 192029 | Male   | 20  | Urine  | Yes | Yes | Positive | No Cq | 34.30 | N/A      | Severe   | 4 |
| 192066 | Female | 66  | Urine  | Yes | Yes | Positive | No Cq | 31.30 | N/A      | Moderate | 4 |
| P.M    | Male   | N/A | Sweat  | No  | Yes | Positive | N/A   | N/A   | Positive | N/A      | 4 |
| P.V    | Female | N/A | Sweat  | No  | Yes | Positive | N/A   | N/A   | Positive | N/A      | 4 |
